# Supplementary material for: Comparative genomics of Coffea species highlights expansion of gene families linked to adaptation and secondary metabolism
Source: Research Square preprint supplement (doi:10.21203/rs.3.rs-7032019/v1), 2025-07-10
Supplement: Supplementary file 1 [file 4bf8ac04cee5a885f2e66abc.xlsx]

## Sheet: List of Supplementary Tables
Comparative genomics of Coffea species highlights expansion of gene families linked to adaptation and secondary metabolism
Sunchung Park1*, Ezekiel Ahn1, Sookyung Oh2, Dapeng Zhang1, Lyndel W. Meinhardt1
1Sustainable Perennial Crops Laboratory, United States Department of Agriculture, Agriculture Research Service, Beltsville, MD, United States.
2Environmental Microbial & Food Safety Laboratory, United States Department of Agriculture, Agriculture Research Service, Beltsville, MD, United States.
Table S1 List of 24 plant species including three coffee species for comparative genomic analysis
Table S2 Orthogroups containing at least one gene from Coffea species
Table S3 Orthogroups specific to the Coffea-lineage
Table S4 Enriched GO biological processes in Coffea-specific orthogroups
Table S5 Species-specific orthogroups in C. arabica, C. canephora, and C. eugenioides
Table S6 Enriched GO biological processes for unassigned genes in C. eugenioides
Table S7 Rapidly evolving gene families (expansion or contraction) in the Coffea-lineage
Table S8 Enriched GO biological processes in rapidly expanded orthogroups of the Coffea-lineage
Table S9 Rapidly evolving gene families (expansion or contraction) in C. arabica
Table S10 Rapidly evolving gene families (expansion or contraction) in C. canephora
Table S11 Rapidly evolving gene families (expansion or contraction) in C. eugenioides
Table S12 Enriched GO biological processes for duplicated genes in C. eugenioides and C. canephora

## Sheet: Table S1
Table S1. List of 24 plant species including three coffee species for comparative genomic analysis
Species	NCBI Acc#	Species Acronym	Family	Order	Total protein count
Phtheirospermum japonicum	GCA_014905375.1	Pj	Orobanchaceae	Lamiales	27814
Striga asiatica	GCA_008636005.1	Sa	Orobanchaceae	Lamiales	31804
Erythranthe guttata	GCF_000504015.1	Eg	Phrymaceae	Lamiales	26891
Sesamum indicum	GCF_000512975.1	Si	Pedaliaceae	Lamiales	23817
Handroanthus impetiginosus	GCA_002762385.1	Hi	Bignoniaceae	Lamiales	30241
Buddleja alternifolia	GCA_019426215.1	Ba	Scrophulariaceae	Lamiales	29352
Salvia splendens	GCF_004379255.2	Ss	Lamiaceae	Lamiales	55107
Andrographis paniculata	GCF_009805555.1	Ap	Acanthaceae	Lamiales	24595
Genlisea aurea	GCA_000441915.1	Ga	Lentibulariaceae	Lamiales	17668
Dorcoceras hygrometricum	GCA_001598015.1	Dh	Gesneriaceae	Lamiales	46635
Fraxinus pennsylvanica	GCA_912172775.2	Fp	Oleaceae	Lamiales	35468
Olea europaea	GCF_002742605.1	Oe	Oleaceae	Lamiales	39167
Solanum lycopersicum	GCF_000188115.5	Sl	Solanaceae	Solanales	25339
Capsicum annuum	GCF_002878395.1	Can	Solanaceae	Solanales	31467
Datura stramonium	GCA_018107945.1	Ds	Solanaceae	Solanales	44778
Lycium ferocissimum	GCF_029784015.1	Lf	Solanaceae	Solanales	30386
Anisodus acutangulus	GCA_029783415.1	Aa	Solanaceae	Solanales	38129
Nicotiana attenuata	GCF_001879085.1	Na	Solanaceae	Solanales	33843
Cuscuta europaea	GCA_945859875.1	Ceu	Convolvulaceae	Solanales	22773
Ipomoea triloba	GCF_003576645.1	It	Convolvulaceae	Solanales	30487
Coffea arabica	GCF_003713225.1	Ca	Rubiaceae	Gentianales	44478
Coffea eugenioides	GCF_003713205.1	Ce	Rubiaceae	Gentianales	28952
Coffea canephora	GCA_900059795.1	Cc	Rubiaceae	Gentianales	25287
Oldenlandia corymbosa	GCA_949775105.1	Oc	Rubiaceae	Gentianales	24917

## Sheet: Table S2
Table S2 Orthogroups containing at least one gene from Coffea species
*Functional annotation is provided based on UniProt and Pfam database hits.
Orthogroup ID	Total gene count	UniPro.Hit*	Pfam.Hit*	Gene count
				C. canephora	C. eugenioides	C. arabica
OG00000	1764	MY106_ARATH;Transcription factor MYB106 {ECO:0000305}	Myb_DNA-binding;PF00249.34^Myb_DNA-bind_6;PF13921.9	55	62	91
OG00001	1505	POLR2_ARATH;Retrovirus-related Pol polyprotein from transposon RE2	RVT_2;PF07727.17	1	13	21
OG00003	1282	POL3_DROME;Retrovirus-related Pol polyprotein from transposon 17.6	RT_RNaseH_2;PF17919.4^RT_RNaseH;PF17917.4^rve;PF00665.29^RVT_1;PF00078.30^Integrase_H2C2;PF17921.4^Retrotrans_gag;PF03732.20	0	104	105
OG00004	1149	RNHX1_ARATH;Putative ribonuclease H protein At1g65750	RVT_1;PF00078.30^RVT_3;PF13456.9^zf-RVT;PF13966.9	17	164	236
OG00006	1064	Y3475_ARATH;Probable LRR receptor-like serine/threonine-protein kinase At3g47570	LRR_4;PF12799.10^LRR_8;PF13855.9^LRR_1;PF00560.36^Pkinase;PF00069.28^PK_Tyr_Ser-Thr;PF07714.20^ABC1;PF03109.19^LRRNT_2;PF08263.15^LRR_6;PF13516.9	75	89	115
OG00007	1038	TF211_SCHPO;Transposon Tf2-11 polyprotein	RVT_3;PF13456.9^rve;PF00665.29^RT_RNaseH_2;PF17919.4^RVT_1;PF00078.30^RT_RNaseH;PF17917.4^Retrotrans_gag;PF03732.20	0	101	127
OG00009	996	PP258_ARATH;Pentatricopeptide repeat-containing protein At3g26782 mitochondrial	PPR;PF01535.23^PPR_2;PF13041.9^PPR_1;PF12854.10^PPR_3;PF13812.9^PPR_long;PF17177.7^E_motif;PF20431.1^DYW_deaminase;PF14432.9^Eplus_motif;PF20430.1^TPR_14;PF13428.9^TPR_19;PF14559.9	45	53	70
OG00010	953	YI31B_YEAST;Transposon Ty3-I Gag-Pol polyprotein	Integrase_H2C2;PF17921.4	0	67	100
OG00011	952	ZMYM1_HUMAN;Zinc finger MYM-type protein 1	DUF4371;PF14291.9^Dimer_Tnp_hAT;PF05699.17	0	47	78
OG00012	946	Y1130_ARATH;G-type lectin S-receptor-like serine/threonine-protein kinase At1g11300	PK_Tyr_Ser-Thr;PF07714.20^Pkinase;PF00069.28^S_locus_glycop;PF00954.23^PAN_2;PF08276.14^B_lectin;PF01453.27^DUF3403;PF11883.11^ABC1;PF03109.19	38	37	73
OG00013	933	POLR1_ARATH;Retrovirus-related Pol polyprotein from transposon RE1	Retrotran_gag_3;PF14244.9^Retrotrans_gag;PF03732.20^Retrotran_gag_2;PF14223.9^gag_pre-integrs;PF13976.9^rve;PF00665.29	2	3	4
OG00014	925	DIT1_ARATH;Dicarboxylate transporter 1 chloroplastic	MULE;PF10551.12^DBD_Tnp_Mut;PF03108.18^SWIM;PF04434.20	4	61	105
OG00015	872	DHH1_ASPNC;ATP-dependent RNA helicase dhh1	Transposase_21;PF02992.17^DUF4218;PF13960.9^Transpos_assoc;PF13963.9^DUF4216;PF13952.9	0	76	93
OG00016	843	YG31B_YEAST;Transposon Ty3-G Gag-Pol polyprotein	RVP_2;PF08284.14^Retrotrans_gag;PF03732.20^Ty3_capsid;PF19259.2^RVT_1;PF00078.30^RT_RNaseH_2;PF17919.4^RT_RNaseH;PF17917.4^gag-asp_proteas;PF13975.9^Integrase_H2C2;PF17921.4^Asp_protease_2;PF13650.9	1	58	104
OG00017	783	POLR_DROME;Retrovirus-related Pol polyprotein from type-2 retrotransposable element R2DM	RVT_1;PF00078.30^zf-RVT;PF13966.9	2	7	8
OG00019	733	PIF1_SCHPO;ATP-dependent DNA helicase pfh1	PIF1;PF05970.17^Helitron_like_N;PF14214.9^AAA_30;PF13604.9	0	10	21
OG00020	713	RRM3_YEAST;ATP-dependent DNA helicase RRM3 {ECO:0000255|HAMAP-Rule:MF_03177}	PIF1;PF05970.17^Helitron_like_N;PF14214.9^AAA_30;PF13604.9	4	119	183
OG00021	648	M1250_ARATH;Uncharacterized mitochondrial protein AtMg01250	RVT_1;PF00078.30^zf-RVT;PF13966.9^RVT_3;PF13456.9	3	78	121
OG00022	617	R1A10_SOLDE;Putative late blight resistance protein homolog R1A-10	NB-ARC;PF00931.25^Rx_N;PF18052.4^Arm;PF00514.26	27	35	54
OG00024	591	LRL22_ARATH;LEAF RUST 10 DISEASE-RESISTANCE LOCUS RECEPTOR-LIKE PROTEIN KINASE-like 2.2 {ECO:0000303|PubMed:12805585}	PK_Tyr_Ser-Thr;PF07714.20^Pkinase;PF00069.28^GUB_WAK_bind;PF13947.9^WAK_assoc;PF14380.9	37	50	65
OG00025	585	FAR1_ARATH;Protein FAR-RED IMPAIRED RESPONSE 1	MULE;PF10551.12^FAR1;PF03101.18^SWIM;PF04434.20^COMM_domain;PF07258.17	1	34	48
OG00026	583	RAB14_PIG;Ras-related protein Rab-14	DDE_Tnp_4;PF13359.9^Plant_tran;PF04827.17^DDE_Tnp_1;PF01609.24	11	37	78
OG00027	582	RNHX1_ARATH;Putative ribonuclease H protein At1g65750	DUF4283;PF14111.9	2	32	51
OG00028	571	AB3B_ARATH;ABC transporter B family member 3	Retrotran_gag_2;PF14223.9	0	33	41
OG00029	567	C7D55_HYOMU;Premnaspirodiene oxygenase	p450;PF00067.25	33	45	70
OG00030	557	WAKLG_ARATH;Wall-associated receptor kinase-like 8	EGF_CA;PF07645.18^Pkinase;PF00069.28^PK_Tyr_Ser-Thr;PF07714.20^GUB_WAK_bind;PF13947.9^EGF_3;PF12947.10^cEGF;PF12662.10^EGF;PF00008.30^FXa_inhibition;PF14670.9	17	28	43
OG00031	548	POL3_DROME;Retrovirus-related Pol polyprotein from transposon 17.6	RVP_2;PF08284.14^RVT_1;PF00078.30^Retrotrans_gag;PF03732.20^RT_RNaseH_2;PF17919.4^Ty3_capsid;PF19259.2^RT_RNaseH;PF17917.4^gag-asp_proteas;PF13975.9^Integrase_H2C2;PF17921.4	1	61	68
OG00033	546	MIK2_ARATH;MDIS1-interacting receptor like kinase 2 {ECO:0000303|PubMed:26863186}	LRR_4;PF12799.10^LRR_8;PF13855.9^LRR_1;PF00560.36^PK_Tyr_Ser-Thr;PF07714.20^Pkinase;PF00069.28^LRRNT_2;PF08263.15^LRR_6;PF13516.9^ABC1;PF03109.19	90	101	101
OG00035	526	CA225_CATRO;Cytochrome P450 72A225 {ECO:0000303|PubMed:24710322}	p450;PF00067.25	37	41	58
OG00038	445	Y5597_ARATH;Probable receptor-like protein kinase At5g59700	Malectin;PF11721.11^Malectin_like;PF12819.10^Pkinase;PF00069.28^PK_Tyr_Ser-Thr;PF07714.20	18	22	36
OG00039	443	YI31B_YEAST;Transposon Ty3-I Gag-Pol polyprotein	Retrotrans_gag;PF03732.20^RT_RNaseH_2;PF17919.4^RT_RNaseH;PF17917.4^RVT_1;PF00078.30^Integrase_H2C2;PF17921.4^Ty3_capsid;PF19259.2^rve;PF00665.29	0	83	83
OG00040	439	PPR38_ARATH;Putative pentatricopeptide repeat-containing protein At1g12700 mitochondrial	PPR_2;PF13041.9^PPR;PF01535.23^PPR_1;PF12854.10^PPR_3;PF13812.9^PPR_long;PF17177.7^MRP-S27;PF10037.12^RPM2;PF08579.14^TPR_19;PF14559.9^ATP13;PF12921.10	22	48	61
OG00041	438	POLX_TOBAC;Retrovirus-related Pol polyprotein from transposon TNT 1-94	Retrotran_gag_2;PF14223.9^gag_pre-integrs;PF13976.9	0	12	20
OG00042	435	POL3_DROME;Retrovirus-related Pol polyprotein from transposon 17.6	Retrotrans_gag;PF03732.20	0	98	91
OG00043	435	Y3471_ARATH;Putative receptor-like protein kinase At3g47110	LRR_8;PF13855.9^LRR_4;PF12799.10^LRR_1;PF00560.36^PK_Tyr_Ser-Thr;PF07714.20^Pkinase;PF00069.28^LRRNT_2;PF08263.15^LRR_6;PF13516.9^ABC1;PF03109.19	61	72	70
OG00044	428	EIX2_SOLLC;Receptor-like protein EIX2 {ECO:0000305}	LRR_4;PF12799.10^LRR_8;PF13855.9^LRR_1;PF00560.36^LRR_6;PF13516.9^LRRNT_2;PF08263.15	20	20	22
OG00047	421	POL4_DROME;Retrovirus-related Pol polyprotein from transposon 412	RVT_3;PF13456.9^RT_RNaseH_2;PF17919.4^RT_RNaseH;PF17917.4^RVT_1;PF00078.30^Retrotrans_gag;PF03732.20^rve;PF00665.29^Integrase_H2C2;PF17921.4^RNase_H;PF00075.27	1	40	55
OG00048	417	RPM1_ARATH;Disease resistance protein RPM1 {ECO:0000303|PubMed:7638602}	NB-ARC;PF00931.25^Rx_N;PF18052.4^LRR_8;PF13855.9^LRR_4;PF12799.10	84	106	69
OG00054	387	RNHX1_ARATH;Putative ribonuclease H protein At1g65750	RVT_1;PF00078.30	0	13	20
OG00055	385	C7317_PRUMU;Cytochrome P450 736A117 {ECO:0000303|PubMed:25015725}	p450;PF00067.25	19	41	49
OG00057	376	Y3475_ARATH;Probable LRR receptor-like serine/threonine-protein kinase At3g47570	LRR_4;PF12799.10^LRR_8;PF13855.9^LRR_1;PF00560.36^LRRNT_2;PF08263.15^LRR_6;PF13516.9	29	44	48
OG00059	369	FH13_ARATH;Formin-like protein 13	zf-GRF;PF06839.15	1	36	40
OG00060	366	PLY11_ARATH;Putative pectate lyase 11	DUF4283;PF14111.9^zf-CCHC_4;PF14392.9	4	54	70
OG00064	359	UGT29_PANGI;UDP-glucosyltransferase 29 {ECO:0000303|PubMed:25769286}	UDPGT;PF00201.21	15	17	30
OG00065	358	AB39G_ORYSJ;ABC transporter G family member 39 {ECO:0000303|PubMed:18299247}	ABC2_membrane_7;PF19055.3^AAA_21;PF13304.9^ABC2_membrane;PF01061.27^ABC_tran;PF00005.30^PDR_assoc;PF08370.14^ABC_trans_N;PF14510.9^AAA_16;PF13191.9^AAA_29;PF13555.9	12	16	21
OG00067	353	CYT24_CATRO;Cytochrome P450 76T24 {ECO:0000303|PubMed:24710322}	p450;PF00067.25	17	25	41
OG00068	353	FB145_ARATH;Putative F-box protein At3g16210	NA	0	3	9
OG00069	348	FRA16_FRAAN;Major strawberry allergen Fra a 1.06 {ECO:0000305}	Bet_v_1;PF00407.22	17	21	41
OG00072	344	CRK25_ARATH;Cysteine-rich receptor-like protein kinase 25	Stress-antifung;PF01657.20^PK_Tyr_Ser-Thr;PF07714.20^Pkinase;PF00069.28^ABC1;PF03109.19	24	40	40
OG00073	343	NA#	DUF659;PF04937.18^Dimer_Tnp_hAT;PF05699.17	5	25	26
OG00074	343	RSLE2_ORYSJ;Zinc finger BED domain-containing protein RICESLEEPER 2	DUF4413;PF14372.9^Dimer_Tnp_hAT;PF05699.17^zf-BED;PF02892.18	6	39	73
OG00075	343	TPS32_SOLLC;Viridiflorene synthase {ECO:0000303|PubMed:21813655}	Terpene_synth_C;PF03936.19^Terpene_syn_C_2;PF19086.3^Terpene_synth;PF01397.24	12	32	28
OG00076	340	POLX_TOBAC;Retrovirus-related Pol polyprotein from transposon TNT 1-94	Retrotran_gag_2;PF14223.9^DUF4219;PF13961.9^gag_pre-integrs;PF13976.9	0	9	17
OG00077	339	XB35_ORYSJ;Probable E3 ubiquitin-protein ligase XBOS35	Ank_2;PF12796.10^Ank_4;PF13637.9^Ank_5;PF13857.9^PGG;PF13962.9^Ank_3;PF13606.9^Ank;PF00023.33^DUF4219;PF13961.9	16	28	25
OG00078	331	SCGT_TOBAC;Scopoletin glucosyltransferase	UDPGT;PF00201.21	9	11	12
OG00079	330	AX15A_SOYBN;Auxin-induced protein 15A	Auxin_inducible;PF02519.17	11	12	15
OG00080	322	C71A1_PERAE;Cytochrome P450 71A1	p450;PF00067.25	14	19	34
OG00081	319	DRL31_ARATH;Putative disease resistance protein At5g05400	LRR_4;PF12799.10^LRR_8;PF13855.9^NB-ARC;PF00931.25^ATPase_2;PF01637.21^AAA_22;PF13401.9	27	49	36
OG00082	315	TF29_SCHPO;Transposon Tf2-9 polyprotein	RVT_3;PF13456.9^RT_RNaseH;PF17917.4^RT_RNaseH_2;PF17919.4^RVT_1;PF00078.30^rve;PF00665.29^Integrase_H2C2;PF17921.4^RNase_H;PF00075.27	0	35	66
OG00083	314	SAT_CATRO;Stemmadenine O-acetyltransferase {ECO:0000303|PubMed:29511102}	Transferase;PF02458.18	14	19	22
OG00084	313	IDD10_ARATH;Zinc finger protein JACKDAW {ECO:0000303|PubMed:17785527}	zf-C2H2;PF00096.29	9	9	18
OG00085	309	C76AD_BETVU;Cytochrome P450 76AD1 {ECO:0000303|PubMed:22660548}	RVT_3;PF13456.9^zf-RVT;PF13966.9	4	63	97
OG00086	308	F6H_OCIBA;Flavonoid-6-hydroxylase {ECO:0000303|PubMed:23184958}	p450;PF00067.25	11	14	14
OG00087	302	DIR23_ARATH;Dirigent protein 23	Dirigent;PF03018.17	19	17	44
OG00088	302	GL118_ARATH;Germin-like protein subfamily 1 member 18	Cupin_1;PF00190.25^Cupin_2;PF07883.14	14	29	53
OG00089	300	SCPL2_ARATH;Serine carboxypeptidase-like 2	Peptidase_S10;PF00450.25^Peptidase_S9;PF00326.24	23	22	33
OG00090	296	PBL23_ARATH;Probable serine/threonine-protein kinase PBL23 {ECO:0000305}	Pkinase;PF00069.28^PK_Tyr_Ser-Thr;PF07714.20	8	8	10
OG00091	296	FBL64_ARATH;F-box/LRR-repeat protein At3g59200	FBD;PF08387.13^F-box;PF00646.36^LRR_2;PF07723.16	14	20	25
OG00092	295	AAP5_ARATH;Amino acid permease 5	Aa_trans;PF01490.21^Trp_Tyr_perm;PF03222.16	11	17	25
OG00093	292	HSP14_SOYBN;17.5 kDa class I heat shock protein	HSP20;PF00011.24^ArsA_HSP20;PF17886.4	11	8	18
OG00094	290	POLX_TOBAC;Retrovirus-related Pol polyprotein from transposon TNT 1-94	RVT_2;PF07727.17^LRR_8;PF13855.9	0	5	5
OG00095	288	PGLR_PERAE;Polygalacturonase	MULE;PF10551.12^SWIM;PF04434.20	2	21	30
OG00096	282	RSLE2_ORYSJ;Zinc finger BED domain-containing protein RICESLEEPER 2	DUF4413;PF14372.9^Dimer_Tnp_hAT;PF05699.17^zf-BED;PF02892.18	0	10	21
OG00098	279	SBT4_LOTJA;Subtilisin-like protease 4 {ECO:0000303|PubMed:19220794}	Peptidase_S8;PF00082.25^fn3_6;PF17766.4^PA;PF02225.25^Inhibitor_I9;PF05922.19	11	16	17
OG00099	278	ZOX_PHAVU;Zeatin O-xylosyltransferase {ECO:0000303|PubMed:10364407}	UDPGT;PF00201.21	10	8	19
OG00100	275	NLTP_HELAN;Non-specific lipid-transfer protein	Tryp_alpha_amyl;PF00234.25^LTP_2;PF14368.9	6	9	20
OG00101	272	H32_ICTBU;Histone H3.2	Histone;PF00125.27	7	8	12
OG00102	272	UGT2_GARJA;7-deoxyloganetin glucosyltransferase	UDPGT;PF00201.21	22	25	31
OG00103	271	SWT10_ARATH;Bidirectional sugar transporter SWEET10 {ECO:0000303|PubMed:21107422}	MtN3_slv;PF03083.19	7	6	11
OG00104	271	XYL2_MEDSV;Beta-xylosidase/alpha-L-arabinofuranosidase 2 {ECO:0000303|PubMed:17615411 ECO:0000312|EMBL:ABQ45228.1}	Glyco_hydro_3_C;PF01915.25^Glyco_hydro_3;PF00933.24^Fn3-like;PF14310.9	13	11	21
OG00105	271	U74C1_ARATH;UDP-glycosyltransferase 74C1	UDPGT;PF00201.21	20	26	40
OG00106	270	PMA2_ARATH;ATPase 2 plasma membrane-type {ECO:0000303|PubMed:2143186}	E1-E2_ATPase;PF00122.23^Hydrolase;PF00702.29^Cation_ATPase_N;PF00690.29	11	9	16
OG00108	266	NEPRN_NEPVE;Protein neprosin {ECO:0000303|PubMed:27481162}	Neprosin;PF03080.18^Neprosin_AP;PF14365.9	21	21	29
OG00109	266	RGA3_SOLBU;Putative disease resistance protein RGA3	LRR_4;PF12799.10^LRR_8;PF13855.9^NB-ARC;PF00931.25^Rx_N;PF18052.4^LRR_1;PF00560.36^Nucleoporin2;PF04096.17	31	36	31
OG00110	263	OMT3_HUMLU;Probable O-methyltransferase 3 {ECO:0000303|PubMed:18223037}	Methyltransf_2;PF00891.21^Dimerisation;PF08100.14	19	31	28
OG00112	260	RL40A_ARATH;Ubiquitin-ribosomal protein eL40z fusion protein {ECO:0000305}	ubiquitin;PF00240.26^Rad60-SLD;PF11976.11^Ubiquitin_2;PF14560.9^TBK1_ULD;PF18396.4^Ribosomal_L40e;PF01020.20^Ribosomal_S27;PF01599.22^Ribosomal_S19;PF00203.24	19	5	10
OG00113	260	CESA5_ORYSI;Probable cellulose synthase A catalytic subunit 5 [UDP-forming]	Cellulose_synt;PF03552.17^zf-UDP;PF14569.9^Glyco_trans_2_3;PF13632.9^WD40;PF00400.35	7	7	11
OG00114	260	POL2_DROME;Retrovirus-related Pol polyprotein from transposon 297	Retrotrans_gag;PF03732.20	0	2	4
OG00115	259	XYN5L_ARATH;Endo-14-beta-xylanase 5-like {ECO:0000305}	Retrotrans_gag;PF03732.20	0	1	4
OG00116	257	ACT1_ORYSJ;Actin-1	Actin;PF00022.22	7	8	13
OG00117	254	GSTXA_TOBAC;Probable glutathione S-transferase parA	GST_N;PF02798.23^GST_N_3;PF13417.9^GST_C_2;PF13410.9^GST_N_2;PF13409.9^GST_C;PF00043.28	14	16	29
OG00118	253	AGL62_ARATH;Agamous-like MADS-box protein AGL62	SRF-TF;PF00319.21	8	14	32
OG00119	252	GGM13_GNEGN;MADS-box protein GGM13	SRF-TF;PF00319.21^K-box;PF01486.20	9	5	12
OG00120	250	9DC3_SOLPI;Receptor-like protein 9DC3 {ECO:0000312|EMBL:AAT77550.1}	LRR_4;PF12799.10^LRR_8;PF13855.9^LRR_1;PF00560.36^LRR_6;PF13516.9^LRRNT_2;PF08263.15	14	22	23
OG00121	247	LRL12_ARATH;LEAF RUST 10 DISEASE-RESISTANCE LOCUS RECEPTOR-LIKE PROTEIN KINASE-like 1.2 {ECO:0000303|PubMed:12805585}	Pkinase;PF00069.28^PK_Tyr_Ser-Thr;PF07714.20^WAK_assoc;PF14380.9^GUB_WAK_bind;PF13947.9	4	5	6
OG00122	246	SUT32_ARATH;Sulfate transporter 3.2	Sulfate_transp;PF00916.23^STAS;PF01740.24	6	7	13
OG00123	244	TBB_HORVU;Tubulin beta chain	Tubulin;PF00091.28^Tubulin_C;PF03953.20	7	8	13
OG00125	243	H41_WHEAT;Histone H4 variant TH011	CENP-T_C;PF15511.9	6	6	11
OG00126	242	MTDH_APIGR;Mannitol dehydrogenase	ADH_N;PF08240.15^ADH_zinc_N;PF00107.29	9	14	22
OG00127	242	ACCH3_SOLLC;1-aminocyclopropane-1-carboxylate oxidase homolog	2OG-FeII_Oxy;PF03171.23^DIOX_N;PF14226.9	10	10	9
OG00128	242	POLR1_ARATH;Retrovirus-related Pol polyprotein from transposon RE1	Retrotran_gag_2;PF14223.9	1	0	0
OG00129	241	OGG1_RAT;N-glycosylase/DNA lyase	Retrotran_gag_2;PF14223.9	0	3	8
OG00130	241	LIN1_NYCCO;LINE-1 reverse transcriptase homolog	DUF4283;PF14111.9	1	1	3
OG00131	239	UFOG6_FRAAN;UDP-glucose flavonoid 3-O-glucosyltransferase 6 {ECO:0000303|PubMed:18487633}	UDPGT;PF00201.21	15	17	35
OG00132	238	UBC8_ARATH;Ubiquitin-conjugating enzyme E2 8	UQ_con;PF00179.29	5	5	8
OG00133	238	RGA2_SOLBU;Disease resistance protein RGA2	LRR_4;PF12799.10^LRR_8;PF13855.9^NB-ARC;PF00931.25^Rx_N;PF18052.4^AAA_16;PF13191.9	8	26	27
OG00134	233	C7150_PRUMU;Cytochrome P450 71AU50 {ECO:0000303|PubMed:25015725}	p450;PF00067.25	12	13	19
OG00135	233	RGLB_NEOFI;Probable rhamnogalacturonate lyase B	CBM-like;PF14683.9^fn3_3;PF14686.9^Rhamnogal_lyase;PF06045.14^CarboxypepD_reg;PF13620.9	10	7	16
OG00138	230	GSK3B_XENLA;Glycogen synthase kinase-3 beta	PK_Tyr_Ser-Thr;PF07714.20^Pkinase;PF00069.28	7	8	11
OG00140	229	RAC5_ORYSJ;Rac-like GTP-binding protein 5	Ras;PF00071.25^Roc;PF08477.16	6	6	12
OG00141	228	KIRO_ACTDE;Kirola {ECO:0000303|PubMed:21309790}	Bet_v_1;PF00407.22	6	6	10
OG00142	228	SPH5_ARATH;S-protein homolog 5 {ECO:0000303|PubMed:10344198}	Self-incomp_S1;PF05938.14	3	3	5
OG00143	226	ERLL2_ARATH;pEARLI1-like lipid transfer protein 2	Hydrophob_seed;PF14547.9^Tryp_alpha_amyl;PF00234.25^LTP_2;PF14368.9	4	5	8
OG00144	226	CPR1_ARATH;F-box protein CPR1	F-box;PF00646.36^F-box-like;PF12937.10^FBA_1;PF07734.16	2	6	10
OG00148	223	MYBF_ARATH;Putative Myb family transcription factor At1g14600	Myb_DNA-binding;PF00249.34	9	6	15
OG00150	222	SOT14_ARATH;Cytosolic sulfotransferase 14	Sulfotransfer_1;PF00685.30^Sulfotransfer_3;PF13469.9	14	19	23
OG00151	221	RPP13_ARATH;Disease resistance protein RPP13	NB-ARC;PF00931.25^Rx_N;PF18052.4^LRR_4;PF12799.10^LRR_8;PF13855.9	36	25	50
OG00152	218	FBL47_ARATH;F-box/LRR-repeat protein At3g26922	FBD;PF08387.13^F-box;PF00646.36	10	23	19
OG00153	217	ACD6_ARATH;Protein ACCELERATED CELL DEATH 6 {ECO:0000303|PubMed:10488236}	Ank_3;PF13606.9^Ank;PF00023.33^Ank_5;PF13857.9^Ank_2;PF12796.10^Ank_4;PF13637.9^PGG;PF13962.9	11	17	21
OG00154	216	H2B11_ORYSJ;Histone H2B.11	Histone;PF00125.27	5	5	8
OG00155	214	EXPA2_ARATH;Expansin-A2	DPBB_1;PF03330.21^Expansin_C;PF01357.24	6	7	10
OG00156	213	TRNH_DATST;Tropinone reductase homolog	adh_short_C2;PF13561.9^adh_short;PF00106.28^KR;PF08659.13	16	17	18
OG00158	212	5MAT1_SALSN;Malonyl-coenzyme:anthocyanin 5-O-glucoside-6'''-O-malonyltransferase {ECO:0000303|PubMed:11598135}	Transferase;PF02458.18	4	7	16
OG00160	210	POLR_DROME;Retrovirus-related Pol polyprotein from type-2 retrotransposable element R2DM	RVT_1;PF00078.30^DUF4283;PF14111.9	2	1	4
OG00161	209	BGH3B_BACO1;Beta-glucosidase BoGH3B	Glyco_hydro_3;PF00933.24^Glyco_hydro_3_C;PF01915.25	7	10	6
OG00162	209	POL4_DROME;Retrovirus-related Pol polyprotein from transposon 412	Retrotrans_gag;PF03732.20^RVT_3;PF13456.9^RT_RNaseH;PF17917.4^RT_RNaseH_2;PF17919.4^RVT_1;PF00078.30^Integrase_H2C2;PF17921.4^RNase_H;PF00075.27^rve;PF00665.29	0	16	23
OG00163	208	PPO_MALDO;Polyphenol oxidase chloroplastic	Tyrosinase;PF00264.23^PPO1_KFDV;PF12143.11^PPO1_DWL;PF12142.11	3	5	12
OG00164	208	DRL4_ARATH;Putative disease resistance protein At1g50180	NB-ARC;PF00931.25^Rx_N;PF18052.4^LRR_8;PF13855.9^LRR_4;PF12799.10	26	29	42
OG00165	206	DIOX2_PAPSO;Protopine O-dealkylase {ECO:0000303|PubMed:23928311}	2OG-FeII_Oxy;PF03171.23^DIOX_N;PF14226.9	14	20	27
OG00166	206	GDL8_ARATH;GDSL esterase/lipase At1g28590	Lipase_GDSL;PF00657.25	11	20	32
OG00167	204	POLX_TOBAC;Retrovirus-related Pol polyprotein from transposon TNT 1-94	RVT_2;PF07727.17	0	0	5
OG00168	204	LAMT_CATRO;Loganic acid O-methyltransferase {ECO:0000303|PubMed:24104568 ECO:0000303|PubMed:29399933}	Methyltransf_7;PF03492.18	11	19	16
OG00169	204	HSP7N_ARATH;Heat shock 70 kDa protein 18	MreB_Mbl;PF06723.16^HSP70;PF00012.23	9	9	16
OG00170	204	RGA3_SOLBU;Putative disease resistance protein RGA3	LRR_4;PF12799.10^LRR_8;PF13855.9^NB-ARC;PF00931.25^Rx_N;PF18052.4	12	48	15
OG00171	204	AUR2_ARATH;Serine/threonine-protein kinase Aurora-2	Retrotrans_gag;PF03732.20	0	37	39
OG00172	203	EIX1_SOLLC;Receptor-like protein EIX1 {ECO:0000305}	LRR_4;PF12799.10^LRR_8;PF13855.9^LRR_1;PF00560.36^LRR_6;PF13516.9^LRRNT_2;PF08263.15	29	64	42
OG00173	201	AT17_ACTDE;Alcohol acyltransferase 17 {ECO:0000303|PubMed:21450321}	Transferase;PF02458.18	8	9	20
OG00174	201	GSTX6_SOYBN;Probable glutathione S-transferase	GST_N_3;PF13417.9^GST_N;PF02798.23^GST_N_2;PF13409.9^GST_C;PF00043.28^GST_C_2;PF13410.9	4	5	5
OG00175	200	LERK4_ORYSI;G-type lectin S-receptor-like serine/threonine-protein kinase LECRK4 {ECO:0000305}	B_lectin;PF01453.27^PK_Tyr_Ser-Thr;PF07714.20^Pkinase;PF00069.28	11	11	23
OG00176	200	PRB1_TOBAC;Basic form of pathogenesis-related protein 1	CAP;PF00188.29	6	8	17
OG00178	198	TPSGD_VITVI;(-)-germacrene D synthase	Terpene_synth_C;PF03936.19^Terpene_syn_C_2;PF19086.3^Terpene_synth;PF01397.24	8	7	4
OG00179	197	U86A2_ARATH;UDP-glycosyltransferase 86A2	UDPGT;PF00201.21	5	9	7
OG00180	196	ATESY_VITVI;(-)-alpha-terpineol synthase	Terpene_synth_C;PF03936.19^Terpene_syn_C_2;PF19086.3^Terpene_synth;PF01397.24	7	5	8
OG00183	193	HOX1A_MAIZE;Homeobox protein HOX1A	Retrotran_gag_2;PF14223.9^DUF4219;PF13961.9	0	10	11
OG00184	192	DTX43_ARATH;Protein DETOXIFICATION 43 {ECO:0000303|PubMed:11739388}	BPS1;PF03087.17	4	6	13
OG00185	192	NA	Ank_3;PF13606.9^Ank_5;PF13857.9^Ank_4;PF13637.9^Ank;PF00023.33^Ank_2;PF12796.10^PGG;PF13962.9	8	13	19
OG00186	191	Y3720_ARATH;UPF0481 protein At3g47200	DUF247;PF03140.18	19	20	22
OG00187	189	Y1465_ARATH;Late embryogenesis abundant protein At1g64065 {ECO:0000305}	LEA_2;PF03168.16	13	16	32
OG00188	188	ERF92_ARATH;Ethylene-responsive transcription factor 1B	AP2;PF00847.23	4	9	13
OG00189	187	7DLGT_CATRO;7-deoxyloganetic acid glucosyl transferase {ECO:0000303|PubMed:24104568 ECO:0000303|PubMed:24710322}	UDPGT;PF00201.21	10	12	14
OG00191	186	NA	DBD_Tnp_Mut;PF03108.18^MULE;PF10551.12^SWIM;PF04434.20^PB1;PF00564.27	0	16	15
OG00192	186	CCR1_PETHY;Cinnamoyl-CoA reductase 1 {ECO:0000303|PubMed:24985707 ECO:0000303|PubMed:25217505}	Epimerase;PF01370.24^3Beta_HSD;PF01073.22^NAD_binding_4;PF07993.15^NAD_binding_10;PF13460.9^GDP_Man_Dehyd;PF16363.8^NmrA;PF05368.16	16	19	32
OG00193	185	LRX5_ARATH;Leucine-rich repeat extensin-like protein 5	LRR_8;PF13855.9^LRR_4;PF12799.10^LRR_1;PF00560.36	5	6	7
OG00194	185	YAKC_SCHPO;Aldo-keto reductase yakc [NADP(+)]	Aldo_ket_red;PF00248.24	22	32	39
OG00195	185	UBP13_ARATH;Ubiquitin C-terminal hydrolase 13 {ECO:0000303|PubMed:11115897}	MATH;PF00917.29	4	7	13
OG00196	185	PERK6_ARATH;Putative proline-rich receptor-like protein kinase PERK6	PK_Tyr_Ser-Thr;PF07714.20^Pkinase;PF00069.28	4	4	5
OG00197	183	CDR1_ARATH;Aspartic proteinase CDR1	Asp;PF00026.26^TAXi_N;PF14543.9^TAXi_C;PF14541.9	7	11	13
OG00198	183	XTH18_ARATH;Probable xyloglucan endotransglucosylase/hydrolase protein 18	Glyco_hydro_16;PF00722.24^XET_C;PF06955.15	7	8	13
OG00200	182	BBE15_ARATH;Monolignol oxidoreductase AtBBE-like 15 {ECO:0000303|PubMed:26037923}	FAD_binding_4;PF01565.26^BBE;PF08031.15	8	9	14
OG00201	181	RADL6_ARATH;Protein RADIALIS-like 6	Myb_DNA-binding;PF00249.34	5	4	7
OG00202	181	SDR2B_ARATH;Short-chain dehydrogenase/reductase 2b	adh_short_C2;PF13561.9^adh_short;PF00106.28^KR;PF08659.13^Epimerase;PF01370.24	12	15	21
OG00203	181	R13L1_ARATH;Putative disease resistance RPP13-like protein 1	LRR_4;PF12799.10^LRR_8;PF13855.9^NB-ARC;PF00931.25^Rx_N;PF18052.4	45	26	37
OG00204	180	GDL16_ARATH;GDSL esterase/lipase At1g31550	Lipase_GDSL;PF00657.25	11	18	18
OG00205	179	PGLR_PRUPE;Polygalacturonase	Pectate_lyase_3;PF12708.10^Glyco_hydro_28;PF00295.20	9	23	15
OG00206	178	PFKA6_ARATH;ATP-dependent 6-phosphofructokinase 6 {ECO:0000255|HAMAP-Rule:MF_03186}	PFK;PF00365.23	7	5	11
OG00207	178	PTR32_ARATH;Protein NRT1/ PTR FAMILY 1.1	PTR2;PF00854.24^MFS_1;PF07690.19	13	12	23
OG00208	177	WRK43_ARATH;Probable WRKY transcription factor 43	WRKY;PF03106.18	6	5	8
OG00209	177	EF2_CALJA;Elongation factor 2	DUF4283;PF14111.9	0	4	3
OG00210	176	JMT2_THECC;Probable jasmonic acid carboxyl methyltransferase 2 {ECO:0000312|EMBL:EOY14825.1}	Methyltransf_7;PF03492.18	6	8	7
OG00211	176	PLP3_ARATH;Patatin-like protein 3	Patatin;PF01734.25	14	10	19
OG00213	175	YIF1A_HUMAN;Protein YIF1A	NA	2	3	2
OG00214	175	PIP25_ORYSJ;Aquaporin PIP2-5	MIP;PF00230.23	4	5	6
OG00215	174	GIP2_NICBE;Probable aspartic proteinase GIP2 {ECO:0000305}	TAXi_C;PF14541.9^TAXi_N;PF14543.9	6	11	17
OG00216	174	C92C6_MAIZE;Trimethyltridecatetraene synthase {ECO:0000303|PubMed:27662898}	p450;PF00067.25	16	21	30
OG00217	173	CHIA_TOBAC;Acidic endochitinase	Glyco_hydro_18;PF00704.31	18	21	26
OG00218	173	PPP7L_ARATH;Serine/threonine-protein phosphatase 7 long form homolog	PMD;PF10536.12	24	5	13
OG00219	172	SAG39_ORYSI;Senescence-specific cysteine protease SAG39 {ECO:0000305}	Peptidase_C1;PF00112.26^Inhibitor_I29;PF08246.15	10	9	18
OG00220	172	PGLR_TOBAC;Polygalacturonase	Glyco_hydro_28;PF00295.20^Pectate_lyase_3;PF12708.10	7	15	22
OG00222	171	AER_ARATH;NADPH-dependent oxidoreductase 2-alkenal reductase {ECO:0000303|PubMed:16299173}	ADH_zinc_N;PF00107.29^ADH_N_2;PF16884.8^ADH_zinc_N_2;PF13602.9	16	17	22
OG00223	171	LRK44_ARATH;L-type lectin-domain containing receptor kinase IV.4 {ECO:0000303|PubMed:19773388}	Lectin_legB;PF00139.22^Pkinase;PF00069.28^PK_Tyr_Ser-Thr;PF07714.20	28	36	42
OG00224	170	CALM2_SOYBN;Calmodulin-2	EF-hand_1;PF00036.35^EF-hand_6;PF13405.9^EF-hand_5;PF13202.9^EF-hand_8;PF13833.9^EF-hand_7;PF13499.9^EF-hand_9;PF14658.9^EF-hand_4;PF12763.10^SPARC_Ca_bdg;PF10591.12	4	4	7
OG00225	170	SKI23_ARATH;F-box protein SKIP23	DUF295;PF03478.21	9	7	13
OG00226	170	SAU67_ARATH;Auxin-responsive protein SAUR67 {ECO:0000305}	Auxin_inducible;PF02519.17	1	0	0
OG00227	170	RRPO_OENBE;RNA-directed DNA polymerase homolog	RVT_1;PF00078.30	0	0	2
OG00229	169	ADF2_ARATH;Actin-depolymerizing factor 2	Cofilin_ADF;PF00241.23^zf-CCHC;PF00098.26	5	5	8
OG00230	169	LOGLA_ORYSJ;Probable cytokinin riboside 5'-monophosphate phosphoribohydrolase LOGL10	Lysine_decarbox;PF03641.17^LDcluster4;PF18306.4	7	6	6
OG00231	169	LHTL1_ARATH;Lysine histidine transporter-like 1	Aa_trans;PF01490.21^Trp_Tyr_perm;PF03222.16	5	5	5
OG00232	169	SBT3_SOLLC;Subtilisin-like protease SBT3 {ECO:0000303|PubMed:27259555}	Peptidase_S8;PF00082.25^fn3_6;PF17766.4^Inhibitor_I9;PF05922.19	5	4	7
OG00233	168	POLR2_ARATH;Retrovirus-related Pol polyprotein from transposon RE2	Retrotran_gag_3;PF14244.9^gag_pre-integrs;PF13976.9^rve;PF00665.29^Retrotran_gag_2;PF14223.9	0	16	26
OG00235	167	R1A6_SOLDE;Putative late blight resistance protein homolog R1A-6	NB-ARC;PF00931.25^NB-LRR;PF12061.11^Rx_N;PF18052.4^AAA_16;PF13191.9^AAA_22;PF13401.9^AAA_14;PF13173.9^LRR_4;PF12799.10	26	30	47
OG00236	166	REML3_ARATH;B3 domain-containing protein REM-like 3	B3;PF02362.24^MazE_antitoxin;PF04014.21	6	4	8
OG00237	166	TT1_ARATH;Protein TRANSPARENT TESTA 1	NA	5	5	10
OG00238	166	MIRA_SYNDU;Miraculin	Kunitz_legume;PF00197.21	14	15	34
OG00239	165	KAT3_ARATH;Potassium channel KAT3	Ank_4;PF13637.9^Ank_5;PF13857.9^Ank;PF00023.33^Ank_3;PF13606.9^Ion_trans;PF00520.34^Ank_2;PF12796.10^Ion_trans_2;PF07885.19^KHA;PF11834.11^cNMP_binding;PF00027.32	5	7	9
OG00240	165	MYB54_ARATH;Transcription factor MYB54 {ECO:0000303|PubMed:9839469}	Myb_DNA-binding;PF00249.34^Myb_DNA-bind_6;PF13921.9	4	5	7
OG00241	164	PCR3_ARATH;Protein PLANT CADMIUM RESISTANCE 3	PLAC8;PF04749.20	13	13	24
OG00242	163	D14L_ORYSJ;Probable esterase D14L	Abhydrolase_1;PF00561.23^Abhydrolase_6;PF12697.10^Hydrolase_4;PF12146.11	5	9	11
OG00243	163	RRPO_OENBE;RNA-directed DNA polymerase homolog	Retrotrans_gag;PF03732.20^gag-asp_proteas;PF13975.9^Asp_protease_2;PF13650.9^Ty3_capsid;PF19259.2^RVT_1;PF00078.30^RVP_2;PF08284.14^RT_RNaseH;PF17917.4^RT_RNaseH_2;PF17919.4^Asp_protease;PF09668.13^Integrase_H2C2;PF17921.4	0	4	0
OG00244	163	FHY3_ARATH;Protein FAR-RED ELONGATED HYPOCOTYL 3	FAR1;PF03101.18^MULE;PF10551.12	0	1	0
OG00245	162	NA	mTERF;PF02536.17	4	6	10
OG00246	161	SOC1_ARATH;MADS-box protein SOC1 {ECO:0000303|PubMed:15805477 ECO:0000303|PubMed:17428825 ECO:0000303|PubMed:18339670}	K-box;PF01486.20^SRF-TF;PF00319.21	9	4	15
OG00247	161	GDL15_ARATH;GDSL esterase/lipase At1g29670	Lipase_GDSL;PF00657.25	6	9	12
OG00248	160	Y5389_ARATH;Probable receptor-like protein kinase At5g38990	PK_Tyr_Ser-Thr;PF07714.20^Pkinase;PF00069.28^Malectin;PF11721.11^Malectin_like;PF12819.10^ABC1;PF03109.19	7	7	16
OG00249	160	C81F1_ARATH;Cytochrome P450 81F1 {ECO:0000305}	p450;PF00067.25	10	18	18
OG00250	160	RSLE1_ORYSJ;Zinc finger BED domain-containing protein RICESLEEPER 1	DUF4413;PF14372.9^Dimer_Tnp_hAT;PF05699.17^PPR_2;PF13041.9	1	28	49
OG00251	160	ITR1_NICSY;Trypsin inhibitor 1	potato_inhibit;PF00280.21	4	4	3
OG00252	160	CURE1_SOLLC;Cuscuta receptor 1 {ECO:0000303|PubMed:27471302 ECO:0000303|PubMed:33082345}	LRR_4;PF12799.10^LRR_8;PF13855.9^LRR_1;PF00560.36^LRR_6;PF13516.9^LRRNT_2;PF08263.15	3	17	23
OG00253	159	GRP1_TOBAC;Glycine-rich protein	GRP;PF07172.14	12	23	30
OG00254	158	PIK1_ORYSJ;Disease resistance protein Pik-1 {ECO:0000305}	NA	4	4	5
OG00255	158	BGL12_ORYSI;Beta-glucosidase 12 {ECO:0000305}	Glyco_hydro_1;PF00232.21	18	21	27
OG00257	157	SAU51_ARATH;Protein SMALL AUXIN UP-REGULATED RNA 51 {ECO:0000303|PubMed:29258424}	Auxin_inducible;PF02519.17	3	5	8
OG00262	156	DOF14_ARATH;Dof zinc finger protein DOF1.4	zf-Dof;PF02701.18	3	5	6
OG00263	156	PAE6_ARATH;Pectin acetylesterase 6 {ECO:0000303|PubMed:25115560}	PAE;PF03283.16	1	1	2
OG00264	156	6FEH_BETVU;Fructan 6-exohydrolase {ECO:0000312|EMBL:CAD48404.1}	Glyco_hydro_32N;PF00251.23^Glyco_hydro_32C;PF08244.15	9	9	12
OG00267	154	ATCA7_ARATH;Alpha carbonic anhydrase 7	Carb_anhydrase;PF00194.24	5	6	8
OG00269	153	ROG1_YEAST;Putative lipase ROG1	DUF676;PF05057.17	4	4	6
OG00270	152	RUMI_CULQU;O-glucosyltransferase rumi homolog	Glyco_transf_90;PF05686.15	9	11	21
OG00271	152	PDS5C_ARATH;Sister chromatid cohesion protein PDS5 homolog C {ECO:0000305}	PDS5;PF20168.1	6	4	11
OG00273	150	MCTP7_ARATH;Multiple C2 domain and transmembrane region protein 7 {ECO:0000305}	C2;PF00168.33^PRT_C;PF08372.13^Pex24p;PF06398.14	5	5	9
OG00274	150	GOLS1_AJURE;Galactinol synthase 1	Glyco_transf_8;PF01501.23	5	9	10
OG00275	150	STC_RICCO;Sugar carrier protein C	MFS_1;PF07690.19^Sugar_tr;PF00083.27^TRI12;PF06609.16	3	3	6
OG00276	150	PME28_ARATH;Putative pectinesterase/pectinesterase inhibitor 28	Pectinesterase;PF01095.22^PMEI;PF04043.18	4	4	8
OG00277	150	RNHX1_ARATH;Putative ribonuclease H protein At1g65750	RVT_3;PF13456.9^zf-RVT;PF13966.9^RNase_H;PF00075.27	0	6	6
OG00279	149	CSLAA_ARATH;Probable glucomannan 4-beta-mannosyltransferase 10 {ECO:0000305}	Glyco_trans_2_3;PF13632.9^Glycos_transf_2;PF00535.29^Glyco_tranf_2_3;PF13641.9^Glyco_transf_21;PF13506.9	4	5	5
OG00280	148	YCF2_NICTO;Protein Ycf2 {ECO:0000255|HAMAP-Rule:MF_01330}	DUF825;PF05695.15^AAA;PF00004.32	2	0	0
OG00281	148	1433C_TOBAC;14-3-3-like protein C	14-3-3;PF00244.23	1	5	9
OG00282	148	POLR1_ARATH;Retrovirus-related Pol polyprotein from transposon RE1	DUF659;PF04937.18^Dimer_Tnp_hAT;PF05699.17^zf-BED;PF02892.18	3	29	56
OG00283	148	LTPG5_ARATH;Non-specific lipid transfer protein GPI-anchored 5 {ECO:0000303|PubMed:23893219}	LTP_2;PF14368.9^Tryp_alpha_amyl;PF00234.25	3	3	7
OG00284	148	YG31B_YEAST;Transposon Ty3-G Gag-Pol polyprotein	Retrotrans_gag;PF03732.20^Ty3_capsid;PF19259.2	0	0	1
OG00285	148	RNH_HALSA;Ribonuclease HI	RT_RNaseH_2;PF17919.4^RVT_3;PF13456.9^RVT_1;PF00078.30^RT_RNaseH;PF17917.4^rve;PF00665.29^RNase_H;PF00075.27^Retrotrans_gag;PF03732.20^Integrase_H2C2;PF17921.4	0	69	56
OG00286	147	CYCLD_ANTMA;Transcription factor CYCLOIDEA	TCP;PF03634.16	2	2	4
OG00287	147	IPT3_ARATH;Adenylate isopentenyltransferase 3 chloroplastic	IPPT;PF01715.20^IPT;PF01745.19	2	3	5
OG00288	147	XTH24_ARATH;Xyloglucan endotransglucosylase/hydrolase protein 24	Glyco_hydro_16;PF00722.24^XET_C;PF06955.15	2	14	9
OG00289	147	NA	BPS1;PF03087.17	3	4	8
OG00290	147	PMEI_ACTDE;Pectinesterase inhibitor	PMEI;PF04043.18	1	7	12
OG00291	146	ARF1_DAUCA;ADP-ribosylation factor 1	G-alpha;PF00503.23^Roc;PF08477.16^Arf;PF00025.24^Ras;PF00071.25^SRPRB;PF09439.13^Gtr1_RagA;PF04670.15	6	6	12
OG00292	146	SINA3_ARATH;E3 ubiquitin-protein ligase SINAT3 {ECO:0000305}	Sina;PF03145.19	3	5	4
OG00293	146	PERX_NICSY;Lignin-forming anionic peroxidase	peroxidase;PF00141.26	7	9	16
OG00296	145	SUS4_ORYSJ;Sucrose synthase 4	Sucrose_synth;PF00862.22^Glycos_transf_1;PF00534.23^Glyco_trans_1_4;PF13692.9	5	5	8
OG00297	145	SMXL3_ARATH;Protein SMAX1-LIKE 3 {ECO:0000303|PubMed:23893171}	DUF3339;PF11820.11	5	6	7
OG00298	145	JMJ29_ARATH;Lysine-specific demethylase JMJ29 {ECO:0000303|PubMed:18713399}	JmjC;PF02373.25^WRC;PF08879.13	5	5	11
OG00299	145	LAX11_ORYSJ;Auxin transporter-like protein 1	Aa_trans;PF01490.21	5	8	9
OG00300	145	BH118_ARATH;Transcription factor bHLH118	HLH;PF00010.29	5	7	12
OG00302	144	HOX10_ORYSJ;Homeobox-leucine zipper protein HOX10	START;PF01852.22^MEKHLA;PF08670.14^Homeodomain;PF00046.32	3	3	5
OG00303	144	RLK5_ARATH;Receptor-like protein kinase 5	LRR_4;PF12799.10^LRR_8;PF13855.9^LRR_1;PF00560.36^Pkinase;PF00069.28^PK_Tyr_Ser-Thr;PF07714.20^LRR_6;PF13516.9^LRRNT_2;PF08263.15	4	6	7
OG00304	144	GDL79_ARATH;GDSL esterase/lipase At5g33370	Lipase_GDSL;PF00657.25	4	4	3
OG00305	144	C79D3_LOTJA;Isoleucine N-monooxygenase 1	p450;PF00067.25	13	16	22
OG00307	143	TIM10_ARATH;Mitochondrial import inner membrane translocase subunit TIM10	RINGv;PF12906.10	4	4	5
OG00308	143	LERK1_ORYSJ;G-type lectin S-receptor-like serine/threonine-protein kinase LECRK1 {ECO:0000305}	B_lectin;PF01453.27^Pkinase;PF00069.28^PK_Tyr_Ser-Thr;PF07714.20^S_locus_glycop;PF00954.23^ABC1;PF03109.19	17	16	31
OG00309	143	U91A1_ARATH;UDP-glycosyltransferase 91A1	UDPGT;PF00201.21	14	11	18
OG00310	143	POL5_DROME;Retrovirus-related Pol polyprotein from transposon opus	RVT_3;PF13456.9^RT_RNaseH_2;PF17919.4^RT_RNaseH;PF17917.4^rve;PF00665.29^RVT_1;PF00078.30^Integrase_H2C2;PF17921.4	0	2	2
OG00311	142	NA	NA	0	25	26
OG00313	141	NA	Plant_tran;PF04827.17^DDE_Tnp_4;PF13359.9	1	3	5
OG00314	141	ZFP1_ORYSJ;Probable E3 ubiquitin-protein ligase ZFP1 {ECO:0000305}	zf-RING_2;PF13639.9^zf-rbx1;PF12678.10^zf-C3HC4_2;PF13923.9^zf-C3HC4;PF00097.28^zf-RING_11;PF17123.8^zf-RING_5;PF14634.9^zf-C3HC4_3;PF13920.9	2	8	15
OG00315	141	FDL1_ARATH;F-box/FBD/LRR-repeat protein At1g13570	F-box;PF00646.36	1	2	3
OG00317	141	LIN1_NYCCO;LINE-1 reverse transcriptase homolog	RVT_1;PF00078.30^DUF4283;PF14111.9	0	0	2
OG00319	140	ABAH3_ORYSJ;Abscisic acid 8'-hydroxylase 3	p450;PF00067.25	4	4	8
OG00320	140	Y4844_ARATH;Uncharacterized protein At4g28440	NA	4	5	7
OG00321	140	RLF23_ARATH;Rapid alkalinization factor 23	RALF;PF05498.14	5	6	8
OG00322	140	PHG1A_DICDI;Putative phagocytic receptor 1a	EMP70;PF02990.19	3	3	3
OG00323	140	G1L4_ORYSI;Protein G1-like4	ALOG_dom;PF04852.15	4	4	7
OG00324	140	RBE_ARATH;Probable transcriptional regulator RABBIT EARS	zf-C2H2_6;PF13912.9	4	5	7
OG00325	140	UGT7_CATRO;UDP-glucose iridoid glucosyltransferase	UDPGT;PF00201.21	13	14	18
OG00326	140	DRP1A_ARATH;Phragmoplastin DRP1A {ECO:0000305}	Dynamin_M;PF01031.23^GED;PF02212.21^Dynamin_N;PF00350.26	4	6	6
OG00327	140	OPR5_ORYSJ;Putative 12-oxophytodienoate reductase 5	Oxidored_FMN;PF00724.23	10	11	18
OG00328	139	DIR1_ARATH;Dirigent protein 1	DUF707;PF05212.15	4	3	7
OG00329	139	OS13_SOLCO;Osmotin-like protein OSML13	Thaumatin;PF00314.20	5	6	10
OG00331	138	ZAT5_ARATH;Zinc finger protein ZAT5	zf-C2H2_6;PF13912.9^zf-C2H2_4;PF13894.9	3	3	4
OG00332	137	PT112_ORYSJ;Probable inorganic phosphate transporter 1-12	MFS_1;PF07690.19^Sugar_tr;PF00083.27	5	4	6
OG00333	137	RFA1B_ORYSJ;Replication protein A 70 kDa DNA-binding subunit B	REPA_OB_2;PF16900.8^Rep_fac-A_C;PF08646.13	9	22	48
OG00334	137	DRL3_ARATH;Probable disease resistance protein At1g15890	NB-ARC;PF00931.25^LRR_8;PF13855.9^AAA_22;PF13401.9^NACHT;PF05729.15	21	34	16
OG00336	136	COPIA_DROME;Copia protein	Retrotran_gag_2;PF14223.9	0	0	5
OG00337	136	FRS12_ARATH;Protein FAR1-RELATED SEQUENCE 12	MULE;PF10551.12^FAR1;PF03101.18	0	58	46
OG00338	136	GLOX1_ARATH;Aldehyde oxidase GLOX1 {ECO:0000305}	Glyoxal_oxid_N;PF07250.14^GO-like_E_set;PF09118.14	3	2	4
OG00339	136	GPX8_ARATH;Probable glutathione peroxidase 8	GSHPx;PF00255.22^AhpC-TSA;PF00578.24^Redoxin;PF08534.13	5	5	9
OG00340	136	NA	DUF674;PF05056.15	1	1	1
OG00342	135	R144A_XENTR;Probable E3 ubiquitin-protein ligase RNF144A	IBR;PF01485.24	5	5	7
OG00343	135	ERF36_ARATH;Ethylene-responsive transcription factor ERF036	AP2;PF00847.23	3	3	7
OG00344	135	PP2AB_BOVIN;Serine/threonine-protein phosphatase 2A catalytic subunit beta isoform	Metallophos;PF00149.31	3	3	5
OG00345	135	E13C_MUSAC;Glucan endo-13-beta-glucosidase {ECO:0000305}	Glyco_hydro_17;PF00332.21	6	6	14
OG00346	135	ALMT8_ARATH;Aluminum-activated malate transporter 8	ALMT;PF11744.11^FUSC_2;PF13515.9^FUSC;PF04632.15	2	2	2
OG00347	134	YG31B_YEAST;Transposon Ty3-G Gag-Pol polyprotein	NA	0	9	14
OG00348	134	PPA27_ARATH;Probable inactive purple acid phosphatase 27	Metallophos;PF00149.31^fn3_PAP;PF17808.4^Metallophos_C;PF14008.9^Pur_ac_phosph_N;PF16656.8^PPR;PF01535.23^PPR_2;PF13041.9	11	8	10
OG00349	134	RGP5_ARATH;Probable UDP-arabinopyranose mutase 5 {ECO:0000305}	RGP;PF03214.16	3	4	7
OG00350	134	FBL23_ARATH;Putative F-box/LRR-repeat protein 23	F-box-like;PF12937.10^LRR_6;PF13516.9^F-box;PF00646.36^LRR_4;PF12799.10	3	3	5
OG00354	133	TBA6_ARATH;Tubulin alpha-6 chain	Tubulin;PF00091.28^Tubulin_C;PF03953.20	6	6	10
OG00355	133	TF211_SCHPO;Transposon Tf2-11 polyprotein	RT_RNaseH;PF17917.4^Integrase_H2C2;PF17921.4^Chromo;PF00385.27^RT_RNaseH_2;PF17919.4^rve;PF00665.29^RVT_1;PF00078.30	0	2	1
OG00356	133	RBP1_ARATH;RNA-binding protein 1	RRM_1;PF00076.25^RRM_7;PF16367.8	2	2	3
OG00357	132	ERF96_ARATH;Ethylene-responsive transcription factor ERF096	AP2;PF00847.23	2	4	5
OG00358	132	P2B10_ARATH;F-box protein PP2-B10	PP2;PF14299.9	4	4	6
OG00359	132	HD16N_ORYSJ;Casein kinase 1-like protein HD16 {ECO:0000305}	Pkinase;PF00069.28^Pkinase_fungal;PF17667.4^PK_Tyr_Ser-Thr;PF07714.20	4	5	6
OG00360	132	PUP1_ARATH;Purine permease 1 {ECO:0000303|PubMed:10662864}	PUNUT;PF16913.8^EamA;PF00892.23^Nuc_sug_transp;PF04142.18	4	4	9
OG00361	132	POL5_DROME;Retrovirus-related Pol polyprotein from transposon opus	Integrase_H2C2;PF17921.4^RT_RNaseH_2;PF17919.4^RT_RNaseH;PF17917.4^LRR_4;PF12799.10	0	1	3
OG00362	131	LSH10_ARATH;Protein LIGHT-DEPENDENT SHORT HYPOCOTYLS 10	ALOG_dom;PF04852.15	3	3	6
OG00363	131	NUD10_ARATH;Nudix hydrolase 10	Nudix_hydro;PF18290.4^NUDIX;PF00293.31	5	7	10
OG00364	131	REMO_SOLTU;Remorin	Remorin_C;PF03763.16^Remorin_N;PF03766.16	3	4	6
OG00365	131	GLYT3_ARATH;Probable glycosyltransferase At5g03795	Exostosin;PF03016.18	6	4	7
OG00366	131	PER5_VITVI;Peroxidase 5 {ECO:0000250|UniProtKB:P22195}	peroxidase;PF00141.26	4	4	10
OG00367	131	PP12_TOBAC;Serine/threonine-protein phosphatase PP1 isozyme 2	Metallophos;PF00149.31^STPPase_N;PF16891.8	5	5	6
OG00368	131	Y3720_ARATH;UPF0481 protein At3g47200	DUF247;PF03140.18	1	2	2
OG00369	131	SHI_ARATH;Protein SHORT INTERNODES	DUF702;PF05142.15	3	3	4
OG00370	131	CHI5_ORYSJ;Chitinase 5	Glyco_hydro_19;PF00182.22^Chitin_bind_1;PF00187.22	5	14	16
OG00371	131	ODD19_ORYSJ;2-oxoglutarate-dependent dioxygenase 19 {ECO:0000303|PubMed:25728912}	2OG-FeII_Oxy;PF03171.23^DIOX_N;PF14226.9	5	6	11
OG00372	130	RBL10_ARATH;RHOMBOID-like protein 10 chloroplastic {ECO:0000303|PubMed:17181860}	DUF3511;PF12023.11	5	3	4
OG00373	130	RLP6_ARATH;Receptor-like protein 6 {ECO:0000303|PubMed:18434605}	LRR_4;PF12799.10^LRR_8;PF13855.9^LRR_1;PF00560.36^LRR_6;PF13516.9^LRRNT_2;PF08263.15	4	6	13
OG00374	130	UXS2_ARATH;UDP-glucuronic acid decarboxylase 2	NAD_binding_4;PF07993.15^GDP_Man_Dehyd;PF16363.8^Epimerase;PF01370.24^3Beta_HSD;PF01073.22^RmlD_sub_bind;PF04321.20^Polysacc_synt_2;PF02719.18	3	3	8
OG00375	130	IAL1_MAIZE;Protein IAL1	LOB;PF03195.17	3	4	6
OG00376	130	ILI6_ORYSJ;Transcription factor ILI6	HLH;PF00010.29	4	4	7
OG00377	130	RGLG4_ARATH;E3 ubiquitin-protein ligase RGLG4 {ECO:0000305}	Copine;PF07002.19^zf-C3HC4_3;PF13920.9	4	4	6
OG00378	130	Y5698_ARATH;Putative B3 domain-containing protein At5g66980	B3;PF02362.24	3	5	9
OG00379	130	CB25_PETSP;Chlorophyll a-b binding protein 91R chloroplastic	Chloroa_b-bind;PF00504.24	3	2	5
OG00380	130	AATP6_ARATH;AAA-ATPase At3g28520	AAA;PF00004.32^AAA_assoc;PF14363.9	4	4	8
OG00382	129	DNJ49_ARATH;Chaperone protein dnaJ 49	DUF3444;PF11926.11^DnaJ;PF00226.34	2	1	2
OG00383	129	CYP1_CROXC;Flavonoid 3'-monooxygenase CYP75B137 {ECO:0000305}	p450;PF00067.25	3	4	4
OG00384	129	LOX13_SOLTU;Probable linoleate 9S-lipoxygenase 3	Lipoxygenase;PF00305.22^PLAT;PF01477.26	5	5	9
OG00385	129	NBS_NARPS;Norbelladine synthase {ECO:0000303|PubMed:30526483}	Bet_v_1;PF00407.22^Polyketide_cyc2;PF10604.12	4	1	5
OG00386	128	FACR8_ARATH;Fatty acyl-CoA reductase 8 {ECO:0000305}	NAD_binding_4;PF07993.15^Sterile;PF03015.22^Epimerase;PF01370.24^3Beta_HSD;PF01073.22	2	1	3
OG00387	128	CAX1A_ORYSJ;Vacuolar cation/proton exchanger 1a	Na_Ca_ex;PF01699.27	4	4	7
OG00388	128	NA	PAR1;PF06521.14	2	3	4
OG00389	128	C87A3_ORYSJ;Cytochrome P450 87A3	p450;PF00067.25	10	16	22
OG00390	128	BBE21_ARATH;Berberine bridge enzyme-like 21 {ECO:0000303|PubMed:26037923}	BBE;PF08031.15^FAD_binding_4;PF01565.26	6	7	15
OG00391	128	21KD_DAUCA;21 kDa protein	PMEI;PF04043.18	4	4	8
OG00392	128	ASOL_BRANA;L-ascorbate oxidase homolog	Cu-oxidase_2;PF07731.17^Cu-oxidase;PF00394.25^Cu-oxidase_3;PF07732.18	4	5	6
OG00393	128	PSE1_ARATH;Protein LEAD-SENSITIVE 1 {ECO:0000303|PubMed:27335453}	LRAT;PF04970.16	5	5	6
OG00394	128	GEML7_ARATH;GEM-like protein 7	GRAM;PF02893.23	4	5	8
OG00395	128	YS1_MAIZE;Iron-phytosiderophore transporter yellow stripe 1	mTERF;PF02536.17	4	8	15
OG00397	127	AUXI1_ARATH;Auxilin-related protein 1 {ECO:0000305}	NA	4	3	5
OG00398	127	HDR3_ORYSJ;LIM domain-containing protein HDR3 {ECO:0000305}	LIM;PF00412.25^DA1-like;PF12315.11	3	3	4
OG00399	127	CIPKI_ORYSJ;CBL-interacting protein kinase 18	Pkinase;PF00069.28^PK_Tyr_Ser-Thr;PF07714.20^NAF;PF03822.17^Kinase-like;PF14531.9^ABC1;PF03109.19	3	4	5
OG00400	127	GLIP5_ARATH;GDSL esterase/lipase 5	Lipase_GDSL;PF00657.25	11	12	24
OG00401	126	FER1_NOSSO;Ferredoxin-1	Abhydrolase_1;PF00561.23^Abhydrolase_6;PF12697.10^Hydrolase_4;PF12146.11	2	2	5
OG00402	126	VAP13_ARATH;Vesicle-associated protein 1-3	Motile_Sperm;PF00635.29	3	4	6
OG00403	126	WTR13_ARATH;WAT1-related protein At2g37460	EamA;PF00892.23	3	4	6
OG00404	126	UBP12_ARATH;Ubiquitin C-terminal hydrolase 12 {ECO:0000303|PubMed:11115897}	USP7_C2;PF14533.9^USP7_ICP0_bdg;PF12436.11^UCH_1;PF13423.9^UCH;PF00443.32^MATH;PF00917.29	2	4	2
OG00405	126	SCP34_ARATH;Serine carboxypeptidase-like 34	Peptidase_S10;PF00450.25	14	9	11
OG00406	126	NA	Transposase_24;PF03004.17^Transposase_23;PF03017.17^DUF4216;PF13952.9	0	31	22
OG00407	125	IPYR_ORYSJ;Soluble inorganic pyrophosphatase	Pyrophosphatase;PF00719.22	3	3	5
OG00408	125	NAC32_ARATH;NAC transcription factor 32 {ECO:0000305}	NAM;PF02365.18	4	4	6
OG00409	125	BCA2_ARATH;Beta carbonic anhydrase 2 chloroplastic	Pro_CA;PF00484.22	3	4	6
OG00410	125	PTR1_ARATH;Protein NRT1/ PTR FAMILY 8.1	PTR2;PF00854.24^MFS_1;PF07690.19	4	4	8
OG00411	125	RFA1B_ORYSJ;Replication protein A 70 kDa DNA-binding subunit B	Rep_fac-A_C;PF08646.13^REPA_OB_2;PF16900.8	15	16	33
OG00413	124	LRK91_ARATH;L-type lectin-domain containing receptor kinase IX.1 {ECO:0000303|PubMed:19773388}	Lectin_legB;PF00139.22^Pkinase;PF00069.28^PK_Tyr_Ser-Thr;PF07714.20^Bact_lectin;PF18483.4	3	1	2
OG00414	124	STAD_BRANA;Stearoyl-[acyl-carrier-protein] 9-desaturase chloroplastic	FA_desaturase_2;PF03405.17	3	7	4
OG00415	124	PLI2B_ORYSJ;LIM domain-containing protein PLIM2b {ECO:0000305}	LIM;PF00412.25	3	3	5
OG00416	124	GSTX6_SOYBN;Probable glutathione S-transferase	GST_N;PF02798.23^GST_N_3;PF13417.9^GST_N_2;PF13409.9^GST_C;PF00043.28^GST_C_2;PF13410.9	4	11	10
OG00417	124	EGS2_CLABR;Eugenol synthase 2 {ECO:0000303|PubMed:18208524}	NmrA;PF05368.16^NAD_binding_10;PF13460.9^Epimerase;PF01370.24^GDP_Man_Dehyd;PF16363.8^Sacchrp_dh_NADP;PF03435.21	8	23	25
OG00418	124	Y3518_ARATH;B3 domain-containing protein At3g25182	At2g31720-like;PF03754.16	0	5	14
OG00421	123	CP19B_ARATH;Peptidyl-prolyl cis-trans isomerase CYP19-2	Pro_isomerase;PF00160.24	3	4	5
OG00422	123	G2OX_PHACN;Gibberellin 2-beta-dioxygenase	2OG-FeII_Oxy;PF03171.23^DIOX_N;PF14226.9	2	2	3
OG00423	123	ACCH9_ARATH;1-aminocyclopropane-1-carboxylate oxidase homolog 9	DIOX_N;PF14226.9^2OG-FeII_Oxy;PF03171.23	4	5	5
OG00424	123	BAD1_ARATH;Ankyrin repeat-containing protein BDA1 {ECO:0000305}	Ank_3;PF13606.9^Ank_5;PF13857.9^Ank_4;PF13637.9^Ank_2;PF12796.10^Ank;PF00023.33^PGG;PF13962.9	9	11	26
OG00425	123	CDPKS_ORYSJ;Calcium-dependent protein kinase 28 {ECO:0000305}	EF-hand_1;PF00036.35^EF-hand_8;PF13833.9^EF-hand_6;PF13405.9^EF-hand_5;PF13202.9^EF-hand_7;PF13499.9^EF-hand_4;PF12763.10^PK_Tyr_Ser-Thr;PF07714.20^Pkinase;PF00069.28^EF-hand_9;PF14658.9	3	3	4
OG00426	123	UBP14_ARATH;Ubiquitin carboxyl-terminal hydrolase 14	DUF3774;PF12609.11	7	4	6
OG00427	123	NA	Retrotrans_gag;PF03732.20	0	36	61
OG00428	122	EXPA8_ARATH;Expansin-A8	DPBB_1;PF03330.21^Expansin_C;PF01357.24	4	4	6
OG00429	122	GRXS6_ARATH;Monothiol glutaredoxin-S6	Glutaredoxin;PF00462.27	7	10	11
OG00430	122	DVL4_ARATH;Small polypeptide DEVIL 4 {ECO:0000303|PubMed:14871303}	DVL;PF08137.15	3	4	9
OG00432	121	E70H1_ARATH;Exocyst complex component EXO70H1 {ECO:0000303|PubMed:16942608}	Exo70;PF03081.18	3	3	5
OG00433	121	NAC87_ARATH;NAC domain-containing protein 87 {ECO:0000303|PubMed:15029955}	NAM;PF02365.18	3	3	5
OG00434	121	MJE1_VITVI;Methyl jasmonate esterase 1 {ECO:0000303|PubMed:26934101}	Abhydrolase_6;PF12697.10^Abhydrolase_1;PF00561.23^Hydrolase_4;PF12146.11	2	4	6
OG00435	121	IMPA4_ARATH;Importin subunit alpha-4 {ECO:0000305}	Arm;PF00514.26^HEAT_2;PF13646.9^HEAT_EZ;PF13513.9^HEAT;PF02985.25^Arm_2;PF04826.16^IBB;PF01749.23^Arm_3;PF16186.8	3	3	7
OG00436	121	RTNLA_ARATH;Reticulon-like protein B1	Reticulon;PF02453.20	3	3	7
OG00437	121	DEF02_ARATH;Defensin-like protein 2	Gamma-thionin;PF00304.23	2	2	5
OG00438	121	NA	DUF674;PF05056.15	7	3	6
OG00440	120	PBL9_ARATH;Probable serine/threonine-protein kinase PBL9 {ECO:0000305}	PK_Tyr_Ser-Thr;PF07714.20^Pkinase;PF00069.28	3	4	6
OG00441	120	FB79_ARATH;Putative F-box protein At1g67623	NA	7	30	32
OG00442	120	ARFV_ORYSJ;Auxin response factor 22	Auxin_resp;PF06507.16^B3;PF02362.24	3	3	2
OG00443	120	DRE1A_ARATH;Dehydration-responsive element-binding protein 1A {ECO:0000303|PubMed:9707537}	AP2;PF00847.23	2	2	4
OG00444	120	LPP2_ARATH;Lipid phosphate phosphatase 2	PAP2;PF01569.24	4	5	7
OG00445	120	U83A1_ARATH;UDP-glycosyltransferase 83A1	UDPGT;PF00201.21	12	12	16
OG00446	120	LAC16_ARATH;Laccase-16	Cu-oxidase_2;PF07731.17^Cu-oxidase_3;PF07732.18^Cu-oxidase;PF00394.25	3	4	8
OG00447	120	GL21_ORYSJ;Putative germin-like protein 2-1	Cupin_1;PF00190.25^Cupin_2;PF07883.14	6	7	10
OG00448	120	NA	DUF604;PF04646.15^Fringe;PF02434.19	3	4	5
OG00452	119	VA711_ARATH;Vesicle-associated membrane protein 711 {ECO:0000303|PubMed:11115874}	Synaptobrevin;PF00957.24^Longin;PF13774.9	2	3	4
OG00453	119	JGB_ARATH;Protein JINGUBANG {ECO:0000303|PubMed:27468890}	WD40;PF00400.35^NBCH_WD40;PF20426.1^PQQ_3;PF13570.9^WD40_2;PF19056.3	4	4	8
OG00454	119	PBP1_ARATH;Calcium-binding protein PBP1	EF-hand_8;PF13833.9	5	8	10
OG00455	119	SERK2_ARATH;Somatic embryogenesis receptor kinase 2 {ECO:0000303|PubMed:11706164}	LRR_4;PF12799.10^LRR_8;PF13855.9^LRR_1;PF00560.36^LRRNT_2;PF08263.15	6	4	9
OG00458	118	SDR4_ARATH;Short-chain dehydrogenase reductase 4	adh_short_C2;PF13561.9^adh_short;PF00106.28^KR;PF08659.13	5	9	11
OG00459	118	METK2_CATRO;S-adenosylmethionine synthase 2	S-AdoMet_synt_M;PF02772.19^S-AdoMet_synt_N;PF00438.23^S-AdoMet_synt_C;PF02773.19	3	3	6
OG00460	118	IF4A2_NICPL;Eukaryotic initiation factor 4A-2	DEAD;PF00270.32^Helicase_C;PF00271.34	3	2	4
OG00461	118	BZP11_ARATH;bZIP transcription factor 11 {ECO:0000305}	bZIP_1;PF00170.24^bZIP_2;PF07716.18	2	4	4
OG00462	118	HIP39_ARATH;Heavy metal-associated isoprenylated plant protein 39 {ECO:0000303|PubMed:21072340 ECO:0000303|PubMed:23368984}	HMA;PF00403.29	4	3	7
OG00463	118	LAC11_ARATH;Laccase-11	Cu-oxidase_2;PF07731.17^Cu-oxidase;PF00394.25^Cu-oxidase_3;PF07732.18	5	5	6
OG00464	118	BDH_LAVIN;Borneol dehydrogenase mitochondrial {ECO:0000303|PubMed:23058847}	adh_short_C2;PF13561.9^adh_short;PF00106.28^KR;PF08659.13	5	4	4
OG00468	117	TERA_XENLA;Transitional endoplasmic reticulum ATPase	AAA;PF00004.32^AAA_2;PF07724.17^AAA_5;PF07728.17^AAA_33;PF13671.9^RuvB_N;PF05496.15^AAA_16;PF13191.9^AAA_22;PF13401.9^AAA_lid_3;PF17862.4^TIP49;PF06068.16^AAA_14;PF13173.9^AAA_18;PF13238.9^CDC48_2;PF02933.20^CDC48_N;PF02359.21^RNA_helicase;PF00910.25	5	3	4
OG00469	117	CDF3_ARATH;Cyclic dof factor 3	zf-Dof;PF02701.18	3	3	4
OG00470	117	FBK15_ARATH;F-box/kelch-repeat protein At1g26930	Kelch_6;PF13964.9^Kelch_1;PF01344.28^Kelch_4;PF13418.9^Kelch_3;PF13415.9^Kelch_2;PF07646.18	6	4	6
OG00471	117	GASA6_ARATH;Gibberellin-regulated protein 6	GASA;PF02704.17	6	5	7
OG00472	117	KCS3_ARATH;3-ketoacyl-CoA synthase 3 {ECO:0000303|PubMed:18465198}	FAE1_CUT1_RppA;PF08392.15^Chal_sti_synt_C;PF02797.18^ACP_syn_III_C;PF08541.13	5	6	7
OG00473	117	DHG_PRIMG;Glucose 1-dehydrogenase	adh_short;PF00106.28^adh_short_C2;PF13561.9^KR;PF08659.13	6	5	7
OG00474	117	NA	Retrotran_gag_2;PF14223.9	0	13	18
OG00476	116	PROF3_HEVBR;Profilin-3	Profilin;PF00235.22	3	3	6
OG00477	116	NA	PMD;PF10536.12	0	0	4
OG00478	116	ADT_CHLRE;ADPATP carrier protein	Mito_carr;PF00153.30	4	4	7
OG00479	116	KIPK2_ARATH;Serine/threonine-protein kinase KIPK2 {ECO:0000305}	PK_Tyr_Ser-Thr;PF07714.20^Pkinase;PF00069.28	3	3	4
OG00480	116	DOF1_ORYSJ;Dof zinc finger protein 1 {ECO:0000305}	zf-Dof;PF02701.18	3	3	5
OG00481	116	FB202_ARATH;Putative F-box protein At3g52320	FBA_1;PF07734.16^F-box;PF00646.36^F-box-like;PF12937.10^FBA_3;PF08268.15	4	5	7
OG00482	115	EF114_ARATH;Ethylene-responsive transcription factor ERF114 {ECO:0000303|PubMed:16407444}	AP2;PF00847.23	3	4	4
OG00483	115	DTX33_ARATH;Protein DETOXIFICATION 33 {ECO:0000303|PubMed:11739388}	MatE;PF01554.21	3	2	3
OG00485	114	ATPA_NICSY;ATP synthase subunit alpha chloroplastic {ECO:0000255|HAMAP-Rule:MF_01346}	ATP-synt_ab;PF00006.28^ATP-synt_ab_C;PF00306.30^ATP-synt_ab_N;PF02874.26	2	0	0
OG00486	114	PIP11_ORYSJ;Aquaporin PIP1-1	MIP;PF00230.23	3	3	4
OG00487	114	VATL_BETVU;V-type proton ATPase 16 kDa proteolipid subunit	ATP-synt_C;PF00137.24	3	3	5
OG00488	114	EIF1B_HUMAN;Eukaryotic translation initiation factor 1b	SUI1;PF01253.25	4	4	8
OG00489	114	SBT56_ARATH;Subtilisin-like protease SBT5.6 {ECO:0000303|PubMed:16193095}	Peptidase_S8;PF00082.25^fn3_6;PF17766.4^Inhibitor_I9;PF05922.19^PA;PF02225.25	5	10	8
OG00490	114	CNG15_ARATH;Putative cyclic nucleotide-gated ion channel 15	Ion_trans;PF00520.34^cNMP_binding;PF00027.32	4	5	7
OG00491	114	ASMT_ARATH;Acetylserotonin O-methyltransferase {ECO:0000305}	Methyltransf_2;PF00891.21^Dimerisation;PF08100.14	4	5	6
OG00492	114	HIDM_GLYEC;2-hydroxyisoflavanone dehydratase	Abhydrolase_3;PF07859.16^BD-FAE;PF20434.1^COesterase;PF00135.31	5	8	8
OG00493	114	POLX_TOBAC;Retrovirus-related Pol polyprotein from transposon TNT 1-94	gag_pre-integrs;PF13976.9^rve;PF00665.29^Retrotran_gag_2;PF14223.9^RVT_2;PF07727.17	2	6	4
OG00494	114	RGA2_SOLBU;Disease resistance protein RGA2	LRR_8;PF13855.9^NB-ARC;PF00931.25^Rx_N;PF18052.4	58	16	36
OG00495	114	F6H1_ARATH;Feruloyl CoA ortho-hydroxylase 1 {ECO:0000303|PubMed:18547395}	2OG-FeII_Oxy;PF03171.23^DIOX_N;PF14226.9	11	8	21
OG00496	113	EF1A_VICFA;Elongation factor 1-alpha	GTP_EFTU;PF00009.30^GTP_EFTU_D3;PF03143.20^GTP_EFTU_D2;PF03144.28	3	3	3
OG00497	113	CPR1_ARATH;F-box protein CPR1	F-box;PF00646.36^F-box-like;PF12937.10^FBA_1;PF07734.16	4	5	10
OG00498	113	VLN3_ORYSJ;Villin-3 {ECO:0000303|PubMed:20807878}	Gelsolin;PF00626.25^VHP;PF02209.22	4	3	5
OG00499	112	AGL61_ARATH;Agamous-like MADS-box protein AGL61	SRF-TF;PF00319.21	1	2	3
OG00500	112	LBD1_ARATH;LOB domain-containing protein 1	LOB;PF03195.17	2	2	4
OG00501	112	RLA2B_MAIZE;Large ribosomal subunit protein P2B {ECO:0000305}	Ribosomal_60s;PF00428.22	5	4	7
OG00502	112	NA	DUF1645;PF07816.14	2	2	3
OG00503	112	SAP8_ORYSI;Zinc finger A20 and AN1 domain-containing stress-associated protein 8	zf-A20;PF01754.19^zf-AN1;PF01428.19	2	2	4
OG00504	112	XYN5L_ARATH;Endo-14-beta-xylanase 5-like {ECO:0000305}	Glyco_hydro_10;PF00331.23^CBM_4_9;PF02018.20^CarboxypepD_reg;PF13620.9	2	1	2
OG00505	112	GAOX3_ARATH;Gibberellin 20 oxidase 3 {ECO:0000305|PubMed:7630935}	2OG-FeII_Oxy;PF03171.23^DIOX_N;PF14226.9	10	8	14
OG00506	112	NRT21_ARATH;High-affinity nitrate transporter 2.1	MFS_1;PF07690.19	2	2	4
OG00507	112	LAC3_ORYSJ;Laccase-3	Cu-oxidase_2;PF07731.17^Cu-oxidase_3;PF07732.18^Cu-oxidase;PF00394.25	6	8	6
OG00508	112	M3K17_ARATH;Mitogen-activated protein kinase kinase kinase 17 {ECO:0000303|PubMed:25720833}	Pkinase;PF00069.28^PK_Tyr_Ser-Thr;PF07714.20	2	3	4
OG00509	112	UBQ10_ARATH;Polyubiquitin 10	ubiquitin;PF00240.26^Rad60-SLD;PF11976.11^Ubiquitin_2;PF14560.9^TBK1_ULD;PF18396.4^Rad60-SLD_2;PF13881.9^Dsc3_N;PF10302.12^DUF2604;PF10790.12^Ubiquitin_5;PF18037.4^Plexin_RBD;PF20170.1^TmoB;PF06234.15^Crinkler;PF20147.2^DUF3861;PF12977.10^Staphylokinase;PF02821.19^HemeBinding_Shp;PF11545.11^Sde2_N_Ubi;PF13019.9^ACT_5;PF13710.9^CFAP298;PF11069.11^UDP-g_GGTase;PF06427.14^DUF493;PF04359.17^NEAT;PF05…	5	7	14
OG00510	112	TGA10_ARATH;Transcription factor TGA10 {ECO:0000303|PubMed:20805327}	DOG1;PF14144.9^bZIP_1;PF00170.24^bZIP_2;PF07716.18	3	3	5
OG00511	112	SD25_ARATH;G-type lectin S-receptor-like serine/threonine-protein kinase SD2-5	B_lectin;PF01453.27^PK_Tyr_Ser-Thr;PF07714.20^Pkinase;PF00069.28^PAN_2;PF08276.14	11	9	19
OG00514	111	GLNA1_MEDSA;Glutamine synthetase cytosolic isozyme	Gln-synt_C;PF00120.27^Gln-synt_N;PF03951.22	3	3	6
OG00515	111	NA	NA	3	3	5
OG00516	111	2A5B_ARATH;Serine/threonine protein phosphatase 2A 57 kDa regulatory subunit B' beta isoform	B56;PF01603.23	2	2	2
OG00517	111	DTX10_ARATH;Protein DETOXIFICATION 10 {ECO:0000303|PubMed:11739388}	MatE;PF01554.21	4	5	4
OG00518	111	MUB6_ARATH;Membrane-anchored ubiquitin-fold protein 6	Rad60-SLD_2;PF13881.9	3	3	4
OG00519	111	14311_ARATH;14-3-3-like protein GF14 omicron	14-3-3;PF00244.23	3	3	6
OG00520	111	RL23_SYNRU;Large ribosomal subunit protein uL14 {ECO:0000305}	Ribosomal_L14;PF00238.22	3	2	3
OG00521	111	Y2416_ARATH;Uncharacterized protein At2g34160	Alba;PF01918.24	4	4	8
OG00522	111	TPL_ARATH;Protein TOPLESS	WD40;PF00400.35^ANAPC4_WD40;PF12894.10	5	3	6
OG00523	111	INVC_ARATH;Alkaline/neutral invertase C mitochondrial {ECO:0000305}	Glyco_hydro_100;PF12899.10	2	2	4
OG00524	111	STKLP_ARATH;Probable transcription factor At4g00390 {ECO:0000305}	DUF573;PF04504.17	1	1	2
OG00526	110	Y5659_ARATH;Probable inactive receptor kinase At5g16590	LRR_8;PF13855.9^LRR_4;PF12799.10^PK_Tyr_Ser-Thr;PF07714.20^Pkinase;PF00069.28^LRRNT_2;PF08263.15	4	3	6
OG00527	110	ASP36_ARATH;Aspartic proteinase 36 {ECO:0000303|PubMed:27872247}	Asp;PF00026.26^TAXi_N;PF14543.9^TAXi_C;PF14541.9	3	2	3
OG00528	110	ATG8C_ARATH;Autophagy-related protein 8c	ATG8;PF02991.19^APG12;PF04110.16	3	4	7
OG00529	110	DJA6_ORYSJ;Chaperone protein dnaJ A6 {ECO:0000305}	DnaJ;PF00226.34^DnaJ_C;PF01556.21^DnaJ_CXXCXGXG;PF00684.22	3	3	6
OG00530	110	IF5A5_SOLTU;Eukaryotic translation initiation factor 5A-5	eIF-5a;PF01287.23	2	4	3
OG00531	110	TC32B_BRANA;Short-chain dehydrogenase TIC 32 B chloroplastic {ECO:0000305}	adh_short;PF00106.28^adh_short_C2;PF13561.9^KR;PF08659.13	7	8	12
OG00532	110	NA	NA	5	5	8
OG00533	110	WAXS4_ARATH;Probable long-chain-alcohol O-fatty-acyltransferase 4	MBOAT_2;PF13813.9	3	5	10
OG00534	110	E131_ARATH;Glucan endo-13-beta-glucosidase 1	X8;PF07983.16	3	4	5
OG00535	110	PTR29_ARATH;Protein NRT1/ PTR FAMILY 5.5	PTR2;PF00854.24^MFS_1;PF07690.19	10	9	18
OG00536	110	CRR55_ARATH;Cysteine-rich repeat secretory protein 55	Stress-antifung;PF01657.20	5	8	16
OG00537	110	NA	NA	3	2	4
OG00539	109	B3GT3_ARATH;Probable beta-13-galactosyltransferase 3	Galactosyl_T;PF01762.24^DUF4094;PF13334.9	3	3	5
OG00540	109	ASOL_TOBAC;L-ascorbate oxidase homolog	Cu-oxidase_2;PF07731.17^Cu-oxidase;PF00394.25^Cu-oxidase_3;PF07732.18	2	2	3
OG00541	109	KWL1_MAIZE;Kiwellin-1 {ECO:0000305}	DPBB_1;PF03330.21	3	2	4
OG00542	109	RAB1B_PONAB;Ras-related protein Rab-1B	Roc;PF08477.16^Ras;PF00071.25^Arf;PF00025.24	3	4	6
OG00543	109	C14B1_ORYSJ;Cytochrome P450 714B1	p450;PF00067.25	5	5	8
OG00544	109	VITH4_ARATH;Vacuolar iron transporter homolog 4 {ECO:0000305}	VIT1;PF01988.22	2	3	5
OG00545	109	ACCO_DIOKA;1-aminocyclopropane-1-carboxylate oxidase	2OG-FeII_Oxy;PF03171.23^DIOX_N;PF14226.9	3	13	16
OG00546	109	C81E7_MEDTR;Isoflavone 2'-hydroxylase {ECO:0000303|PubMed:14617078}	p450;PF00067.25	4	7	6
OG00547	109	AGO4_ARATH;Protein argonaute 4 {ECO:0000303|PubMed:12522258 ECO:0000303|PubMed:28229965}	Piwi;PF02171.20^PAZ;PF02170.25^ArgoL2;PF16488.8^ArgoN;PF16486.8^ArgoL1;PF08699.13^ArgoMid;PF16487.8	4	4	7
OG00549	109	RGA1_SOLBU;Putative disease resistance protein RGA1	LRR_4;PF12799.10^NB-ARC;PF00931.25^Rx_N;PF18052.4^LRR_8;PF13855.9^AAA_22;PF13401.9	24	31	33
OG00550	109	POL5_DROME;Retrovirus-related Pol polyprotein from transposon opus	RVT_3;PF13456.9^RVT_1;PF00078.30^Retrotrans_gag;PF03732.20^Integrase_H2C2;PF17921.4^RT_RNaseH_2;PF17919.4^RT_RNaseH;PF17917.4^RNase_H;PF00075.27^rve;PF00665.29	0	0	1
OG00553	108	PLDA2_BRAOC;Phospholipase D alpha 2	PLDc_2;PF13091.9^PLDc;PF00614.25^PLD_C;PF12357.11^C2;PF00168.33	4	3	6
OG00554	108	CAMK8_ARATH;CDPK-related kinase 8	PK_Tyr_Ser-Thr;PF07714.20^Pkinase;PF00069.28^ABC1;PF03109.19^Mito_carr;PF00153.30	4	3	5
OG00555	108	KN14F_ORYSJ;Kinesin-like protein KIN-14F {ECO:0000305}	Kinesin;PF00225.26^CH;PF00307.34^Microtub_bd;PF16796.8	3	4	5
OG00556	108	IAA4_ARATH;Auxin-responsive protein IAA4	AUX_IAA;PF02309.19	2	2	2
OG00557	108	C80B3_PAPSO;(S)-N-methylcoclaurine 3'-hydroxylase isozyme 1 {ECO:0000305}	p450;PF00067.25	8	7	10
OG00558	108	H2A2_MEDTR;Probable histone H2A.2	Histone;PF00125.27^Histone_H2A_C;PF16211.8	3	3	5
OG00559	108	DTX30_ARATH;Protein DETOXIFICATION 30 {ECO:0000303|PubMed:11739388}	MatE;PF01554.21	8	7	11
OG00560	108	CCL3_HUMLU;Acetate--CoA ligase CCL3 {ECO:0000305|PubMed:23300257}	AMP-binding;PF00501.31^AMP-binding_C;PF13193.9	4	4	5
OG00561	108	GLO16_ORYSJ;Very-long-chain aldehyde decarbonylase GL1-6 {ECO:0000305}	Wax2_C;PF12076.11^FA_hydroxylase;PF04116.16	2	3	5
OG00562	107	NA	NA	1	2	2
OG00563	107	MADS2_VITVI;Agamous-like MADS-box protein MADS2 {ECO:0000305}	K-box;PF01486.20^SRF-TF;PF00319.21	3	3	5
OG00564	107	JOIN_SOLLC;MADS-box protein JOINTLESS	K-box;PF01486.20^SRF-TF;PF00319.21	3	3	6
OG00565	107	AGL17_ARATH;Agamous-like MADS-box protein AGL17	K-box;PF01486.20^SRF-TF;PF00319.21	4	4	6
OG00566	107	U90A1_ARATH;UDP-glycosyltransferase 90A1	UDPGT;PF00201.21	5	7	11
OG00567	107	OCT7_ARATH;Organic cation/carnitine transporter 7	MFS_1;PF07690.19^Sugar_tr;PF00083.27	4	5	8
OG00568	107	PER1_ORYSJ;Peroxidase 1	peroxidase;PF00141.26	5	2	8
OG00569	107	ARFL_ORYSI;Auxin response factor 12	AUX_IAA;PF02309.19^Auxin_resp;PF06507.16^B3;PF02362.24	3	3	6
OG00570	107	Y4648_ARATH;Uncharacterized protein At4g26485	BMT5-like;PF10354.12	4	3	6
OG00571	107	CEN_ARATH;Protein CENTRORADIALIS-like	PBP;PF01161.23	5	4	8
OG00572	107	BSP_BOSSE;Basic secretory protease {ECO:0000303|PubMed:22773449}	BSP;PF04450.15	2	4	5
OG00573	107	NA	NA	0	39	63
OG00577	106	CSLD2_ORYSI;Cellulose synthase-like protein D2	Cellulose_synt;PF03552.17^zf-RING_4;PF14570.9^Glyco_trans_2_3;PF13632.9	3	3	6
OG00578	106	MAOC_FLAPR;NADP-dependent malic enzyme chloroplastic	malic;PF00390.22^Malic_M;PF03949.18	3	4	5
OG00579	106	CAL_BRARC;Transcription factor CAULIFLOWER	K-box;PF01486.20^SRF-TF;PF00319.21	3	4	5
OG00580	106	OBL1_TOBAC;Triacylglycerol lipase OBL1 {ECO:0000305}	Lipase_3;PF01764.28^Mbeg1-like;PF11187.11	6	8	14
OG00581	106	CSCL1_ARATH;CSC1-like protein At1g32090	RSN1_TM;PF13967.9^RSN1_7TM;PF02714.18^PHM7_cyt;PF14703.9	3	4	6
OG00582	106	MDIS1_ARATH;Protein MALE DISCOVERER 1 {ECO:0000303|PubMed:26863186}	PK_Tyr_Ser-Thr;PF07714.20^Pkinase;PF00069.28^LRRNT_2;PF08263.15^LRR_8;PF13855.9^LRR_4;PF12799.10	3	3	6
OG00583	106	POLX_TOBAC;Retrovirus-related Pol polyprotein from transposon TNT 1-94	NA	5	6	7
OG00584	106	Y1154_ARATH;Probable serine/threonine-protein kinase At1g01540	PK_Tyr_Ser-Thr;PF07714.20^Pkinase;PF00069.28	3	3	5
OG00585	106	KPRO_MAIZE;Putative receptor protein kinase ZmPK1	B_lectin;PF01453.27^Pkinase;PF00069.28^PK_Tyr_Ser-Thr;PF07714.20^S_locus_glycop;PF00954.23	7	12	17
OG00586	106	TOM1_ARATH;Tobamovirus multiplication protein 1	THH1_TOM1-3_dom;PF06454.14	3	5	5
OG00587	106	FRS5_ARATH;Protein FAR1-RELATED SEQUENCE 5	FAR1;PF03101.18	5	5	7
OG00589	106	Y1475_ARATH;B3 domain-containing protein At1g49475	B3;PF02362.24	5	5	8
OG00592	105	RGGA_TOBAC;RGG repeats nuclear RNA binding protein A {ECO:0000303|PubMed:11905967}	HABP4_PAI-RBP1;PF04774.18^Stm1_N;PF09598.13^PPR_2;PF13041.9^PPR;PF01535.23^PPR_1;PF12854.10	2	2	5
OG00593	105	CAR2_ARATH;Protein C2-DOMAIN ABA-RELATED 2 {ECO:0000303|PubMed:25465408}	C2;PF00168.33	2	2	4
OG00594	105	CIPK2_ORYSJ;CBL-interacting protein kinase 2	PK_Tyr_Ser-Thr;PF07714.20^Pkinase;PF00069.28^NAF;PF03822.17^Kinase-like;PF14531.9^ABC1;PF03109.19	3	3	6
OG00595	105	DSEL_ARATH;Phospholipase A1-IIgamma	Lipase_3;PF01764.28	3	4	4
OG00596	105	BH114_ARATH;Transcription factor bHLH114	NA	2	2	3
OG00597	105	E134_MAIZE;Endo-13;14-beta-D-glucanase	DLH;PF01738.21	5	5	9
OG00598	105	RH52_ARATH;DEAD-box ATP-dependent RNA helicase 52	Helicase_C;PF00271.34^DEAD;PF00270.32	3	3	5
OG00599	105	E138_ARATH;Glucan endo-13-beta-glucosidase 8	Glyco_hydro_17;PF00332.21^X8;PF07983.16	5	7	7
OG00600	105	C7A22_PANGI;Cytochrome P450 CYP749A22	p450;PF00067.25	4	5	8
OG00601	104	RAP29_ARATH;Ethylene-responsive transcription factor RAP2-9	AP2;PF00847.23	2	4	3
OG00602	104	SAU12_ARATH;Protein SMALL AUXIN UP-REGULATED RNA 12 {ECO:0000303|PubMed:29258424}	Auxin_inducible;PF02519.17	1	1	2
OG00603	104	RGAP2_ARATH;Rho GTPase-activating protein 2	RhoGAP;PF00620.30	3	3	4
OG00604	104	SAR1_CRYNB;Small COPII coat GTPase SAR1	G-alpha;PF00503.23^Arf;PF00025.24^Roc;PF08477.16^SRPRB;PF09439.13^MMR_HSR1;PF01926.26^Ras;PF00071.25	2	3	3
OG00605	104	NCL_ARATH;Sodium/calcium exchanger NCL {ECO:0000305}	EF-hand_1;PF00036.35^Na_Ca_ex;PF01699.27^EF-hand_6;PF13405.9^EF-hand_7;PF13499.9^EF-hand_5;PF13202.9^EF-hand_8;PF13833.9^PPR;PF01535.23^PPR_2;PF13041.9^PPR_1;PF12854.10	2	2	4
OG00606	104	AATP5_ARATH;AAA-ATPase At3g28510	AAA;PF00004.32^AAA_assoc;PF14363.9	7	4	9
OG00607	104	CPS1_ISORU;Copalyl diphosphate synthase 1 chloroplastic {ECO:0000303|PubMed:28381502 ECO:0000303|PubMed:28445526 ECO:0000303|Ref.3}	Terpene_synth_C;PF03936.19^Terpene_synth;PF01397.24	6	6	5
OG00608	104	NIPA3_HUMAN;Magnesium transporter NIPA3	Mg_trans_NIPA;PF05653.17^EamA;PF00892.23	2	2	5
OG00609	104	NLTP1_FOEVU;Non-specific lipid-transfer protein 1 {ECO:0000303|PubMed:33277525}	LTP_2;PF14368.9^Tryp_alpha_amyl;PF00234.25	2	4	5
OG00610	104	PTR19_ARATH;Protein NRT1/ PTR FAMILY 4.6	PTR2;PF00854.24^MFS_1;PF07690.19	6	6	8
OG00611	104	CAES_ARATH;Probable carbohydrate esterase At4g34215	SASA;PF03629.21	3	3	6
OG00612	104	PLAT3_ARATH;PLAT domain-containing protein 3 {ECO:0000305}	PLAT;PF01477.26^ATS3;PF06232.14	2	4	7
OG00616	103	RAB8B_PONAB;Ras-related protein Rab-8B	Ras;PF00071.25^Roc;PF08477.16^Arf;PF00025.24	3	5	7
OG00617	103	PDCB2_ARATH;PLASMODESMATA CALLOSE-BINDING PROTEIN 2	X8;PF07983.16	2	2	3
OG00618	103	CYSKM_ARATH;Cysteine synthase mitochondrial	PALP;PF00291.28	5	6	7
OG00619	103	KC1E_HUMAN;Casein kinase I isoform epsilon	Pkinase;PF00069.28^PK_Tyr_Ser-Thr;PF07714.20^Pkinase_fungal;PF17667.4	2	2	2
OG00620	103	SQE2_PANGI;Squalene monooxygenase SE2 {ECO:0000305}	DAO;PF01266.27^SE;PF08491.13^FAD_binding_3;PF01494.22^GIDA;PF01134.25^FAD_binding_2;PF00890.27	5	4	8
OG00621	103	RS8_MAIZE;Small ribosomal subunit protein eS8 {ECO:0000305}	Ribosomal_S8e;PF01201.25	3	2	4
OG00622	103	PLST_HUMAN;Plastin-3	CH;PF00307.34^CAMSAP_CH;PF11971.11^CH_2;PF06294.14	3	4	6
OG00623	103	UFAA1_MYCTU;Tuberculostearic acid methyltransferase UfaA1 {ECO:0000305}	CMAS;PF02353.23^DAO;PF01266.27^Methyltransf_25;PF13649.9^Methyltransf_11;PF08241.15^Amino_oxidase;PF01593.27^Methyltransf_23;PF13489.9^Methyltransf_12;PF08242.15^NAD_binding_8;PF13450.9^Methyltransf_31;PF13847.9^Pyr_redox_2;PF07992.17^HI0933_like;PF03486.17^Pyr_redox;PF00070.30^FAD_binding_2;PF00890.27^FAD_oxidored;PF12831.10	1	1	2
OG00624	103	FRO3_ARATH;Ferric reduction oxidase 3 mitochondrial	Ferric_reduct;PF01794.22^NAD_binding_6;PF08030.15^FAD_binding_8;PF08022.15^NAD_binding_1;PF00175.24	2	2	4
OG00625	103	UNC13_ARATH;Protein unc-13 homolog {ECO:0000305}	NA	3	3	5
OG00626	103	IAA16_ARATH;Auxin-responsive protein IAA16	AUX_IAA;PF02309.19	2	2	3
OG00627	103	NA	NA	6	8	9
OG00628	103	NA	Myb_DNA-bind_4;PF13837.9	3	4	7
OG00629	103	HIDM_GLYEC;2-hydroxyisoflavanone dehydratase	COesterase;PF00135.31^Abhydrolase_3;PF07859.16^BD-FAE;PF20434.1	6	9	13
OG00631	103	NA	RVT_3;PF13456.9^zf-RVT;PF13966.9	1	7	6
OG00633	102	R23A2_ARATH;Large ribosomal subunit protein uL23y {ECO:0000303|PubMed:36423343}	Ribosomal_L23eN;PF03939.16^Ribosomal_L23;PF00276.23	2	19	20
OG00634	102	MYO10_ARATH;Myosin-10	IQ;PF00612.30^Myosin_head;PF00063.24^DIL;PF01843.22^Myosin_N;PF02736.22	3	4	4
OG00635	102	PGIP_VITVI;Polygalacturonase inhibitor {ECO:0000250|UniProtKB:P58822}	LRR_8;PF13855.9^LRR_4;PF12799.10^LRR_1;PF00560.36^LRRNT_2;PF08263.15^LRR_6;PF13516.9	4	6	6
OG00636	102	YGI3_SCHPO;Uncharacterized WD repeat-containing protein C2A9.03	WD40;PF00400.35^ANAPC4_WD40;PF12894.10	2	3	3
OG00637	102	RAA1E_ARATH;Ras-related protein RABA1e	Roc;PF08477.16^Ras;PF00071.25^Arf;PF00025.24	2	2	3
OG00638	102	GAE4_ARATH;UDP-glucuronate 4-epimerase 4	GDP_Man_Dehyd;PF16363.8^Epimerase;PF01370.24^RmlD_sub_bind;PF04321.20^3Beta_HSD;PF01073.22^Polysacc_synt_2;PF02719.18^NAD_binding_4;PF07993.15	2	2	3
OG00639	102	SUVH5_ARATH;Histone-lysine N-methyltransferase H3 lysine-9 specific SUVH5	Pre-SET;PF05033.19^SAD_SRA;PF02182.20^SET;PF00856.31	4	4	8
OG00640	102	DTX32_ARATH;Protein DETOXIFICATION 32 {ECO:0000303|PubMed:11739388}	MatE;PF01554.21^Polysacc_synt_C;PF14667.9	2	2	4
OG00641	102	FAD2B_CALOF;Delta(12) fatty acid desaturase DES8.11	FA_desaturase;PF00487.27^DUF3474;PF11960.11	7	3	7
OG00644	101	RTM2A_ARATH;Inactive protein RESTRICTED TEV MOVEMENT 2	HSP20;PF00011.24	2	3	5
OG00645	101	GRP_HORVU;Glycine-rich RNA-binding protein blt801 {ECO:0000250|UniProtKB:Q03250 ECO:0000303|PubMed:8639753}	RRM_1;PF00076.25	2	1	3
OG00646	101	CRTE_SYNP2;Geranylgeranyl pyrophosphate synthase {ECO:0000303|PubMed:32523588}	polyprenyl_synt;PF00348.20^LRR_8;PF13855.9^LRR_4;PF12799.10^LRR_1;PF00560.36	3	3	5
OG00647	101	PMTE_ARATH;Probable methyltransferase PMT14	Methyltransf_11;PF08241.15^Methyltransf_29;PF03141.19^Methyltransf_25;PF13649.9	3	3	4
OG00648	101	LOR4_ARATH;Protein LURP-one-related 4	LOR;PF04525.15	2	2	3
OG00649	101	SABP2_TOBAC;Salicylic acid-binding protein 2 {ECO:0000303|PubMed:14673096}	Abhydrolase_6;PF12697.10^Abhydrolase_1;PF00561.23^Hydrolase_4;PF12146.11	8	10	5
OG00650	101	PYL10_ARATH;Abscisic acid receptor PYL10	Polyketide_cyc2;PF10604.12	3	3	5
OG00651	101	PHI1_TOBAC;Protein PHOSPHATE-INDUCED 1 {ECO:0000303|PubMed:10189698}	Phi_1;PF04674.15	4	5	9
OG00652	101	MAD21_ORYSJ;MADS-box transcription factor 21	K-box;PF01486.20^SRF-TF;PF00319.21	3	4	6
OG00653	101	CEEH1_CAEEL;Epoxide hydrolase 1 {ECO:0000312|WormBase:K02F3.6}	Hydrolase_4;PF12146.11^Abhydrolase_1;PF00561.23^Abhydrolase_6;PF12697.10	6	6	9
OG00654	101	BH084_ARATH;Transcription factor bHLH84	HLH;PF00010.29	2	3	3
OG00655	101	SUMO2_ARATH;Small ubiquitin-related modifier 2	Rad60-SLD;PF11976.11^ubiquitin;PF00240.26	3	4	7
OG00656	100	4CL2_PETCR;4-coumarate--CoA ligase 2	AMP-binding;PF00501.31^AMP-binding_C;PF13193.9	2	2	2
OG00657	100	NHL12_ARATH;NDR1/HIN1-like protein 12 {ECO:0000303|PubMed:14666423}	LEA_2;PF03168.16	2	2	2
OG00658	100	ALFL5_ORYSI;PHD finger protein ALFIN-LIKE 5	Alfin;PF12165.11^PHD;PF00628.32	3	3	7
OG00659	100	CALS2_ARATH;Callose synthase 2	Glucan_synthase;PF02364.18^Vta1;PF04652.19^FKS1_dom1;PF14288.9	3	4	6
OG00660	100	MY119_ARATH;Transcription factor MYB119 {ECO:0000303|PubMed:11597504}	Myb_DNA-binding;PF00249.34^Myb_DNA-bind_6;PF13921.9	3	4	6
OG00661	100	CGR3_ARATH;Probable pectin methylesterase CGR3 {ECO:0000303|PubMed:25704846}	NA	4	3	5
OG00662	100	CDPKN_ARATH;Calcium-dependent protein kinase 23	EF-hand_1;PF00036.35^EF-hand_5;PF13202.9^EF-hand_6;PF13405.9^EF-hand_8;PF13833.9^EF-hand_7;PF13499.9^EF-hand_4;PF12763.10^Pkinase;PF00069.28^PK_Tyr_Ser-Thr;PF07714.20^SPARC_Ca_bdg;PF10591.12^EF-hand_9;PF14658.9^Kinase-like;PF14531.9	3	3	4
OG00663	100	BGL12_ORYSI;Beta-glucosidase 12 {ECO:0000305}	Glyco_hydro_1;PF00232.21	3	2	3
OG00664	100	NFD4_ARATH;Protein NUCLEAR FUSION DEFECTIVE 4 {ECO:0000303|PubMed:16698901}	MFS_1;PF07690.19^Nodulin-like;PF06813.16	5	6	9
OG00665	100	TBL34_ARATH;Protein trichome birefringence-like 34	PC-Esterase;PF13839.9^PMR5N;PF14416.9	3	3	6
OG00666	100	AGL80_ARATH;Agamous-like MADS-box protein AGL80	SRF-TF;PF00319.21	0	2	1
OG00667	100	PER36_ARATH;Peroxidase 36	peroxidase;PF00141.26	2	2	3
OG00669	100	PUN1_CAPAN;Acyltransferase Pun1 {ECO:0000305}	Transferase;PF02458.18	1	2	5
OG00670	100	PTGR1_CAVPO;Prostaglandin reductase 1	DUF295;PF03478.21^LRR_8;PF13855.9	0	1	1
OG00671	99	YSL8_ARATH;Probable metal-nicotianamine transporter YSL8	OPT;PF03169.18	4	4	7
OG00672	99	HHO3_ARATH;Transcription factor HHO3 {ECO:0000305}	Myb_DNA-binding;PF00249.34	2	2	4
OG00673	99	Y4052_ARATH;Probable LRR receptor-like serine/threonine-protein kinase At4g30520	LRR_4;PF12799.10^LRR_8;PF13855.9^PK_Tyr_Ser-Thr;PF07714.20^Pkinase;PF00069.28^LRRNT_2;PF08263.15	4	2	4
OG00674	99	AB2B_ARATH;ABC transporter B family member 2	SMC_N;PF02463.22^ABC_membrane;PF00664.26^ABC_tran;PF00005.30^ABC_ATPase;PF09818.12^AAA_29;PF13555.9^AAA_16;PF13191.9^AAA_22;PF13401.9^RsgA_GTPase;PF03193.19^Zeta_toxin;PF06414.15	5	4	8
OG00675	99	RABC1_ARATH;Ras-related protein RABC1	Ras;PF00071.25^Roc;PF08477.16^Arf;PF00025.24	4	4	6
OG00676	99	SBP1_ANTMA;Squamosa promoter-binding protein 1	SBP;PF03110.17	3	3	5
OG00677	99	MF14A_MOUSE;Hippocampus abundant transcript 1 protein {ECO:0000250|UniProtKB:Q96MC6}	MFS_1;PF07690.19^Sugar_tr;PF00083.27	1	2	0
OG00678	99	HA22I_ARATH;HVA22-like protein i	TB2_DP1_HVA22;PF03134.22	3	3	3
OG00679	99	ZAT10_ARATH;Zinc finger protein ZAT10	zf-C2H2_6;PF13912.9^zf-C2H2_4;PF13894.9	1	2	3
OG00680	99	TYDC5_PAPSO;Tyrosine/DOPA decarboxylase 5	Pyridoxal_deC;PF00282.22	7	6	10
OG00681	99	BH115_ARATH;Transcription factor bHLH115	HLH;PF00010.29	2	3	3
OG00682	99	STP13_ARATH;Sugar transport protein 13	MFS_1;PF07690.19^Sugar_tr;PF00083.27	5	6	6
OG00683	99	SOFL5_ARATH;Protein SOB FIVE-LIKE 5 {ECO:0000303|PubMed:29467189}	NA	4	3	5
OG00684	99	FDL10_ARATH;F-box/FBD/LRR-repeat protein At1g78750	FBD;PF08387.13^F-box;PF00646.36	5	5	9
OG00686	98	ROGFE_ARATH;Rop guanine nucleotide exchange factor 14	PRONE;PF03759.16	2	2	4
OG00687	98	RL341_ARATH;Large ribosomal subunit protein eL34z {ECO:0000303|PubMed:36423343}	Ribosomal_L34e;PF01199.21	2	2	3
OG00688	98	PRB1_ARATH;Pathogenesis-related protein 1 {ECO:0000303|PubMed:11725949}	NA	0	2	4
OG00689	98	EGC_CITJA;EG45-like domain containing protein	DPBB_1;PF03330.21	4	4	10
OG00690	98	HSP81_ORYSI;Heat shock protein 81-1	HSP90;PF00183.21^HATPase_c;PF02518.29^HATPase_c_3;PF13589.9	3	4	5
OG00691	98	NFYB4_ARATH;Nuclear transcription factor Y subunit B-4	CBFD_NFYB_HMF;PF00808.26^Histone;PF00125.27	3	3	6
OG00692	98	ACA12_ARATH;Calcium-transporting ATPase 12 plasma membrane-type	Cation_ATPase_C;PF00689.24^E1-E2_ATPase;PF00122.23^Cation_ATPase;PF13246.9^Hydrolase;PF00702.29^Cation_ATPase_N;PF00690.29	6	12	10
OG00693	98	BSK1_ARATH;Serine/threonine-protein kinase BSK1 {ECO:0000305}	Pkinase;PF00069.28^PK_Tyr_Ser-Thr;PF07714.20^TPR_2;PF07719.20	3	3	4
OG00694	98	ARI9_ARATH;Probable E3 ubiquitin-protein ligase ARI9	A_thal_3526;PF09713.13^PPR_2;PF13041.9^PPR_1;PF12854.10^PPR;PF01535.23^PPR_3;PF13812.9	2	2	4
OG00695	98	PTI5_SOLLC;Pathogenesis-related genes transcriptional activator PTI5	AP2;PF00847.23	1	4	9
OG00698	97	PTR39_ARATH;Protein NRT1/ PTR FAMILY 2.3	PTR2;PF00854.24^MFS_1;PF07690.19	6	8	10
OG00699	97	ICR2_ARATH;Interactor of constitutive active ROPs 2 chloroplastic	NA	2	2	3
OG00700	97	MAVI_CUCPE;Mavicyanin	Cu_bind_like;PF02298.20	2	3	7
OG00702	97	PABN2_ARATH;Polyadenylate-binding protein 2 {ECO:0000303|PubMed:18479511}	RRM_1;PF00076.25	2	2	3
OG00703	97	UBC8_SCHPO;Ubiquitin-conjugating enzyme E2 8	UQ_con;PF00179.29	3	3	5
OG00704	97	OTU11_ARATH;OVARIAN TUMOR DOMAIN-containing deubiquitinating enzyme 11 {ECO:0000303|PubMed:24659992}	OTU;PF02338.22	3	3	5
OG00705	97	PMTG_ARATH;Probable methyltransferase PMT16	Methyltransf_11;PF08241.15^Methyltransf_25;PF13649.9^Methyltransf_29;PF03141.19^Methyltransf_31;PF13847.9	3	3	6
OG00706	97	HPAT3_ARATH;Hydroxyproline O-arabinosyltransferase 3 {ECO:0000303|PubMed:24036508}	NA	3	3	4
OG00707	97	PSI1_ARATH;Protein PSK SIMULATOR 1 {ECO:0000303|PubMed:25062973}	DUF668;PF05003.15^DUF3475;PF11961.11	2	3	7
OG00708	97	CPR1_ARATH;F-box protein CPR1	F-box;PF00646.36^FBA_1;PF07734.16^F-box-like;PF12937.10^FBA_3;PF08268.15	4	7	12
OG00709	97	VAP43_ARATH;Vesicle-associated protein 4-3	Motile_Sperm;PF00635.29	4	3	6
OG00710	97	PUB23_ARATH;E3 ubiquitin-protein ligase PUB23	U-box;PF04564.18	2	2	2
OG00711	97	CSP4_ARATH;Cold shock domain-containing protein 4	zf-CCHC;PF00098.26^CSD;PF00313.25^zf-CCHC_4;PF14392.9^zf-CCHC_3;PF13917.9^zf-CCHC_5;PF14787.9	2	7	6
OG00712	97	NFD6_ARATH;Protein NUCLEAR FUSION DEFECTIVE 6 mitochondrial {ECO:0000303|PubMed:16698901}	NA	7	3	6
OG00713	97	WTR14_ARATH;WAT1-related protein At2g39510	EamA;PF00892.23	2	3	3
OG00714	97	HDT3_ARATH;Histone deacetylase HDT3	NA	2	2	4
OG00715	97	Y4597_ARATH;Uncharacterized protein At4g15970	Nucleotid_trans;PF03407.19	6	5	8
OG00716	97	SSL3_ARATH;Protein STRICTOSIDINE SYNTHASE-LIKE 3 {ECO:0000303|PubMed:10777701}	SGL;PF08450.15^Str_synth;PF03088.19^NHL;PF01436.24^SSL_N;PF20067.2	8	7	14
OG00717	97	NA	NA	0	4	5
OG00718	97	TF26_SCHPO;Transposon Tf2-6 polyprotein	Retrotrans_gag;PF03732.20^Ty3_capsid;PF19259.2^RVP_2;PF08284.14	2	50	45
OG00722	96	CPT5_SOLLC;Dehydrodolichyl diphosphate synthase CPT5 chloroplastic {ECO:0000305}	Prenyltransf;PF01255.22	1	1	0
OG00723	96	BCP_PETHY;Blue copper protein {ECO:0000303|PubMed:25971550}	Cu_bind_like;PF02298.20	3	3	6
OG00724	96	AHL22_ARATH;AT-hook motif nuclear-localized protein 22 {ECO:0000312|EMBL:FAA00293.1}	PCC;PF03479.18	2	2	3
OG00725	96	LTG20_ARATH;Non-specific lipid transfer protein GPI-anchored 20 {ECO:0000303|PubMed:23893219}	LTP_2;PF14368.9	2	3	5
OG00726	96	FAF3_ARATH;Protein FANTASTIC FOUR 3	FAF;PF11250.11	2	2	4
OG00727	96	MIP1B_ARATH;B-box domain protein 31 {ECO:0000303|PubMed:19920209}	zf-B_box;PF00643.27	2	2	3
OG00728	96	CYPR1_CYNCA;Cyprosin	Asp;PF00026.26^SapB_2;PF03489.20^SapB_1;PF05184.18^TAXi_N;PF14543.9	3	3	6
OG00729	96	WRN_HUMAN;Bifunctional 3'-5' exonuclease/ATP-dependent helicase WRN {ECO:0000305}	DNA_pol_A_exo1;PF01612.23	1	3	5
OG00730	96	FB253_ARATH;F-box protein At5g07610	F-box;PF00646.36	11	19	24
OG00736	95	DTX4_ARATH;Protein DETOXIFICATION 4 {ECO:0000303|PubMed:11739388}	MatE;PF01554.21	4	5	6
OG00737	95	GH5FP_CHAOB;Glycosyl hydrolase 5 family protein {ECO:0000303|PubMed:27237746}	Cellulase;PF00150.21^Ricin_B_lectin;PF00652.25	3	2	4
OG00738	95	SP1L2_ORYSJ;Protein SPIRAL1-like 2	NA	2	2	4
OG00739	95	SR34A_ARATH;Serine/arginine-rich splicing factor SR34A	RRM_1;PF00076.25	3	4	6
OG00740	95	WRK50_ARATH;Probable WRKY transcription factor 50	WRKY;PF03106.18	3	4	6
OG00741	95	MBD2_ARATH;Methyl-CpG-binding domain-containing protein 2	zf-CW;PF07496.18^MBD;PF01429.22	1	1	2
OG00742	95	RLA13_ARATH;Large ribosomal subunit protein P1y {ECO:0000303|PubMed:36423343}	Ribosomal_60s;PF00428.22	4	3	7
OG00743	95	MEL1_ORYSJ;Protein argonaute MEL1	ArgoN;PF16486.8^ArgoL1;PF08699.13^ArgoL2;PF16488.8^ArgoMid;PF16487.8^Piwi;PF02171.20^PAZ;PF02170.25^Gly-rich_Ago1;PF12764.10	3	3	5
OG00744	95	ORR3_ORYSI;Two-component response regulator ORR3 {ECO:0000305}	Response_reg;PF00072.27	2	1	2
OG00745	95	CYT1_ACTCC;Cysteine proteinase inhibitor 1 {ECO:0000303|PubMed:14697268}	SQAPI;PF16845.8^Cystatin;PF00031.24	1	2	3
OG00746	95	ENDB1_SOLTU;External alternative NAD(P)H-ubiquinone oxidoreductase B1 mitochondrial	Pyr_redox;PF00070.30^Pyr_redox_2;PF07992.17^EF-hand_1;PF00036.35^EF-hand_7;PF13499.9^EF-hand_6;PF13405.9^DAO;PF01266.27	3	4	6
OG00747	95	MPK6_ORYSJ;Mitogen-activated protein kinase 6	Pkinase;PF00069.28^PK_Tyr_Ser-Thr;PF07714.20	3	4	6
OG00748	95	VPEG_ARATH;Vacuolar-processing enzyme gamma-isozyme	Peptidase_C13;PF01650.21	3	3	4
OG00749	95	GGLO2_ARATH;L-gulonolactone oxidase 2 {ECO:0000303|PubMed:20622436}	ALO;PF04030.17^FAD_binding_4;PF01565.26	5	12	11
OG00750	95	Y5374_ARATH;Probable LRR receptor-like serine/threonine-protein kinase At5g37450	LRR_8;PF13855.9^LRR_4;PF12799.10^PK_Tyr_Ser-Thr;PF07714.20^Pkinase;PF00069.28^LRRNT_2;PF08263.15	3	4	5
OG00751	95	LYK3_MEDTR;LysM domain receptor-like kinase 3 {ECO:0000303|PubMed:12947035}	PK_Tyr_Ser-Thr;PF07714.20^Pkinase;PF00069.28^LysM;PF01476.23	5	7	10
OG00752	95	AAPC_CENCI;Putative glucose-6-phosphate 1-epimerase {ECO:0000250|UniProtKB:Q03161}	Aldose_epim;PF01263.23	3	3	5
OG00753	95	NEPS1_NEPRA;(+)-cistrans-nepetalactol synthase NEPS1 {ECO:0000305}	adh_short_C2;PF13561.9^adh_short;PF00106.28^KR;PF08659.13	5	10	13
OG00754	95	SRC2_ARATH;Protein SRC2 homolog {ECO:0000305}	C2;PF00168.33	3	5	12
OG00756	95	VLG_ARATH;Protein VACUOLELESS GAMETOPHYTES {ECO:0000303|PubMed:28107777}	C1_2;PF03107.19^C1_1;PF00130.25^PHD;PF00628.32	10	12	24
OG00757	95	RNHX1_ARATH;Putative ribonuclease H protein At1g65750	RVT_1;PF00078.30^RVT_3;PF13456.9^zf-RVT;PF13966.9^Exo_endo_phos;PF03372.26	0	3	5
OG00759	94	DTX50_ARATH;Protein DETOXIFICATION 50 {ECO:0000303|PubMed:11739388}	MatE;PF01554.21	3	3	6
OG00760	94	Y2228_MYCTO;Uncharacterized protein MT2287	RVT_3;PF13456.9^RNase_H;PF00075.27	3	3	4
OG00761	94	BAME2_ARATH;Leucine-rich repeat receptor-like serine/threonine-protein kinase BAM2	LRR_4;PF12799.10^LRR_8;PF13855.9^LRR_1;PF00560.36^Pkinase;PF00069.28^PK_Tyr_Ser-Thr;PF07714.20^LRRNT_2;PF08263.15^LRR_6;PF13516.9	3	3	3
OG00762	94	BH025_ARATH;Transcription factor bHLH25	HLH;PF00010.29	9	12	19
OG00763	94	DRB2_ARATH;Double-stranded RNA-binding protein 2	dsrm;PF00035.29	4	3	5
OG00764	94	NA	NA	2	2	3
OG00765	94	GSTT2_ARATH;Glutathione S-transferase T2	GST_N;PF02798.23^GST_N_3;PF13417.9^GST_N_2;PF13409.9^GST_C_2;PF13410.9	5	7	11
OG00766	94	HSP21_MAIZE;17.5 kDa class II heat shock protein	HSP20;PF00011.24^ArsA_HSP20;PF17886.4	1	5	9
OG00767	94	MOM1_ARATH;Helicase protein MOM1 {ECO:0000303|PubMed:17082821}	Chromo;PF00385.27^SNF2-rel_dom;PF00176.26	2	4	5
OG00768	94	PVHE_TALVA;Cytochrome P450 monooxygenase pvhE {ECO:0000303|PubMed:30609896}	Endosulfine;PF04667.20	5	3	5
OG00769	94	PAL1_DAUCA;Phenylalanine ammonia-lyase 1	Lyase_aromatic;PF00221.22	4	4	6
OG00770	94	PLT5_ARATH;Polyol transporter 5	MFS_1;PF07690.19^Sugar_tr;PF00083.27	6	7	10
OG00771	94	CMT1_ORYSJ;DNA (cytosine-5)-methyltransferase CMT1 {ECO:0000305}	DNA_methylase;PF00145.20^Chromo;PF00385.27^BAH;PF01426.21^DNMT1-RFD;PF12047.11	2	2	4
OG00772	94	CXE1_PAPSO;3-O-acetylpapaveroxine carboxylesterase CXE1 {ECO:0000305}	Abhydrolase_3;PF07859.16^BD-FAE;PF20434.1^Say1_Mug180;PF10340.12	9	14	22
OG00780	93	HXK5_ORYSJ;Hexokinase-5	Hexokinase_2;PF03727.19^Hexokinase_1;PF00349.24	3	3	4
OG00781	93	CML46_ARATH;Probable calcium-binding protein CML46 {ECO:0000305}	EF-hand_1;PF00036.35^EF-hand_6;PF13405.9^EF-hand_5;PF13202.9^EF-hand_8;PF13833.9^EF-hand_7;PF13499.9	3	3	3
OG00782	93	NA	DUF4050;PF13259.9	4	3	4
OG00783	93	BZP43_ARATH;Basic leucine zipper 43 {ECO:0000303|PubMed:11906833}	bZIP_1;PF00170.24^bZIP_2;PF07716.18	2	3	2
OG00784	93	HMR2A_PANGI;3-hydroxy-3-methylglutaryl coenzyme A reductase 2-A {ECO:0000305|PubMed:24569845}	HMG-CoA_red;PF00368.21	2	2	3
OG00785	93	YUC4_ORYSJ;Indole-3-pyruvate monooxygenase YUCCA4 {ECO:0000305}	Lys_Orn_oxgnase;PF13434.9^Pyr_redox_2;PF07992.17^Pyr_redox_3;PF13738.9^FMO-like;PF00743.22^Pyr_redox;PF00070.30^FAD_binding_3;PF01494.22^NAD_binding_9;PF13454.9	2	2	2
OG00786	93	CDPKE_ARATH;Calcium-dependent protein kinase 14	EF-hand_1;PF00036.35^EF-hand_6;PF13405.9^EF-hand_5;PF13202.9^EF-hand_8;PF13833.9^EF-hand_7;PF13499.9^Pkinase;PF00069.28^PK_Tyr_Ser-Thr;PF07714.20^Kinase-like;PF14531.9	2	2	3
OG00787	93	GDU3_ARATH;Protein GLUTAMINE DUMPER 3	NA	2	3	4
OG00788	93	PIN3A_ORYSJ;Auxin efflux carrier component 3a {ECO:0000305}	Mem_trans;PF03547.21	3	4	4
OG00789	93	CBP3_WHEAT;Serine carboxypeptidase 3	Peptidase_S10;PF00450.25	4	5	4
OG00790	93	UXT2_ARATH;UDP-xylose transporter 2 {ECO:0000312|EMBL:AKA88213.1}	TPT;PF03151.19^EamA;PF00892.23	3	3	6
OG00791	93	PTR23_ARATH;Protein NRT1/ PTR FAMILY 5.13	PTR2;PF00854.24^MFS_1;PF07690.19	3	6	5
OG00792	93	C96T1_NARAP;Noroxomaritidine synthase {ECO:0000303|PubMed:26941773}	p450;PF00067.25	1	2	2
OG00793	93	WRK57_ARATH;Probable WRKY transcription factor 57	WRKY;PF03106.18	2	2	2
OG00794	93	P2A13_ARATH;F-box protein PP2-A13	PP2;PF14299.9	3	3	7
OG00795	92	LAC3_ARATH;Laccase-3	Cu-oxidase_2;PF07731.17^Cu-oxidase;PF00394.25^Cu-oxidase_3;PF07732.18	4	4	7
OG00796	92	NA	Glyco_transf_17;PF04724.16	2	2	1
OG00797	92	ORR26_ORYSJ;Two-component response regulator ORR26 {ECO:0000305}	Myb_DNA-binding;PF00249.34^Response_reg;PF00072.27	1	1	2
OG00798	92	PLY12_ARATH;Probable pectate lyase 12	Pectate_lyase_4;PF00544.22	3	3	5
OG00799	92	LPE1_MAIZE;Nucleobase-ascorbate transporter LPE1	Xan_ur_permease;PF00860.23	2	2	4
OG00800	92	C3H52_ARATH;Zinc finger CCCH domain-containing protein 52	zf-CCCH;PF00642.27^zf-CCCH_4;PF18044.4^zf_CCCH_4;PF18345.4^zf-CCCH_2;PF14608.9^Torus;PF16131.8^KH_1;PF00013.32	5	3	2
OG00801	92	CLPX1_ARATH;CLP protease regulatory subunit CLPX1 mitochondrial {ECO:0000303|PubMed:11299370}	AAA_2;PF07724.17^ClpB_D2-small;PF10431.12^AAA;PF00004.32	6	3	4
OG00802	92	RS9_CAEEL;Small ribosomal subunit protein uS4 {ECO:0000305}	Ribosomal_S4;PF00163.22^S4;PF01479.28	2	2	2
OG00803	92	PRAF1_ARATH;PH RCC1 and FYVE domains-containing protein 1 {ECO:0000303|PubMed:11563980}	RCC1_2;PF13540.9^RCC1;PF00415.21^FYVE;PF01363.24^BRX_N;PF13713.9^BRX;PF08381.14^BRX_assoc;PF16627.8^PH_12;PF16457.8	3	3	5
OG00804	92	AHL2_ARATH;AT-hook motif nuclear-localized protein 2 {ECO:0000312|EMBL:FAA00273.1}	PCC;PF03479.18	2	2	4
OG00805	92	Y4374_ARATH;Probable inactive receptor kinase At4g23740	LRR_8;PF13855.9^LRR_4;PF12799.10^PK_Tyr_Ser-Thr;PF07714.20^Pkinase;PF00069.28^LRRNT_2;PF08263.15	3	3	5
OG00806	92	PDC1_ARATH;Pyruvate decarboxylase 1	TPP_enzyme_C;PF02775.24^TPP_enzyme_M;PF00205.25^TPP_enzyme_N;PF02776.21	3	3	5
OG00807	92	PME59_ARATH;Probable pectinesterase/pectinesterase inhibitor 59	Pectinesterase;PF01095.22^PMEI;PF04043.18	5	8	13
OG00808	92	U75B1_ARATH;UDP-glycosyltransferase 75B1	UDPGT;PF00201.21	5	5	12
OG00809	92	BIP5_TOBAC;Luminal-binding protein 5	MreB_Mbl;PF06723.16^HSP70;PF00012.23	3	6	8
OG00810	92	C7A94_KALSE;Beta-amyrin 28-monooxygenase	p450;PF00067.25	3	2	5
OG00811	92	2SS5_HELAN;2S seed storage protein	Tryp_alpha_amyl;PF00234.25	0	3	5
OG00812	92	CF0_SOLLC;Receptor-like protein Cf-9 homolog {ECO:0000305}	LRR_8;PF13855.9^LRR_4;PF12799.10^LRR_1;PF00560.36^LRR_6;PF13516.9^LRRNT_2;PF08263.15	2	1	2
OG00816	91	MBD10_ARATH;Methyl-CpG-binding domain-containing protein 10	MBD;PF01429.22	3	3	5
OG00817	91	ARI10_ARATH;Probable E3 ubiquitin-protein ligase ARI10	IBR;PF01485.24^Ariadne;PF19422.2	3	3	3
OG00818	91	Y4312_ARATH;Probable LRR receptor-like serine/threonine-protein kinase At4g31250	LRR_8;PF13855.9^Pkinase;PF00069.28^PK_Tyr_Ser-Thr;PF07714.20^LRR_4;PF12799.10^LRRNT_2;PF08263.15	1	1	2
OG00819	91	NA	NA	3	3	5
OG00820	91	B561J_ARATH;Cytochrome b561 and DOMON domain-containing protein At5g47530	DUF568;PF04526.16^Cytochrom_B561;PF03188.19	4	4	8
OG00821	91	NAT5_ARATH;Nucleobase-ascorbate transporter 5	Xan_ur_permease;PF00860.23	3	3	7
OG00822	91	CML23_ORYSJ;Putative calcium-binding protein CML23	EF-hand_6;PF13405.9^EF-hand_1;PF00036.35^EF-hand_8;PF13833.9^EF-hand_5;PF13202.9^EF-hand_7;PF13499.9	1	1	1
OG00823	91	TCP5_ARATH;Transcription factor TCP5	TCP;PF03634.16	2	2	4
OG00824	91	NCED6_ARATH;9-cis-epoxycarotenoid dioxygenase NCED6 chloroplastic	RPE65;PF03055.18	2	2	3
OG00825	91	ZHD10_ARATH;Zinc-finger homeodomain protein 10	ZF-HD_dimer;PF04770.15	1	2	3
OG00827	91	CCD41_ORYSJ;Cyclin-D4-1	Cyclin_N;PF00134.26^Cyclin_C;PF02984.22	2	2	4
OG00828	91	ERF08_ARATH;Ethylene-responsive transcription factor ERF008	AP2;PF00847.23	2	2	4
OG00829	91	SNL3_ARATH;Paired amphipathic helix protein Sin3-like 3	PAH;PF02671.24^Sin3a_C;PF16879.8^Sin3_corepress;PF08295.15	2	2	2
OG00830	91	VDAC4_ORYSJ;Mitochondrial outer membrane protein porin 4	Porin_3;PF01459.25	3	3	6
OG00831	91	GSTF3_ARATH;Glutathione S-transferase F3	GST_C;PF00043.28^GST_N;PF02798.23^GST_N_3;PF13417.9^GST_N_2;PF13409.9^GST_C_2;PF13410.9^GST_C_3;PF14497.9	1	2	2
OG00832	91	NCED1_ORYSJ;9-cis-epoxycarotenoid dioxygenase NCED1 chloroplastic {ECO:0000305}	RPE65;PF03055.18	1	1	2
OG00833	91	RAB2A_RABIT;Ras-related protein Rab-2A	Roc;PF08477.16^Ras;PF00071.25^Arf;PF00025.24	2	2	3
OG00834	91	IP5P6_ARATH;Type IV inositol polyphosphate 5-phosphatase 6 {ECO:0000305}	Exo_endo_phos;PF03372.26	3	2	3
OG00835	91	RSLE2_ORYSJ;Zinc finger BED domain-containing protein RICESLEEPER 2	Dimer_Tnp_hAT;PF05699.17^DUF4413;PF14372.9	2	0	1
OG00836	91	FB345_ARATH;F-box protein At4g00755	NA	3	2	4
OG00837	91	FH6_ARATH;Formin-like protein 6	FH2;PF02181.26	2	2	2
OG00838	91	WRKY6_ARATH;WRKY transcription factor 6 {ECO:0000303|PubMed:11722756}	WRKY;PF03106.18	2	2	4
OG00839	91	ZIP10_ARATH;Probable zinc transporter 10	Zip;PF02535.25	5	6	7
OG00840	91	Y4744_ARATH;Uncharacterized protein At4g06744	LRR_8;PF13855.9^LRR_4;PF12799.10^LRR_1;PF00560.36	4	3	8
OG00841	91	ENOL1_ORYSJ;Early nodulin-like protein 1 {ECO:0000303|PubMed:15653800}	Cu_bind_like;PF02298.20	3	2	7
OG00843	91	B561C_ARATH;Cytochrome b561 and DOMON domain-containing protein At3g25290	DUF568;PF04526.16^Cytochrom_B561;PF03188.19	2	2	5
OG00844	91	VPP1_NEUCR;V-type proton ATPase subunit a	V_ATPase_I;PF01496.22	3	3	5
OG00847	90	TIP11_MAIZE;Aquaporin TIP1-1	MIP;PF00230.23	3	4	5
OG00848	90	SCL30_ARATH;Scarecrow-like protein 30	GRAS;PF03514.17	5	5	11
OG00849	90	NA	CUE;PF02845.19	2	2	3
OG00850	90	UBC2_DICDI;Ubiquitin-conjugating enzyme E2 2	UQ_con;PF00179.29	3	2	3
OG00851	90	ERF25_ARATH;Ethylene-responsive transcription factor ERF025	AP2;PF00847.23	2	2	4
OG00852	90	EXB12_ORYSJ;Expansin-B12	Expansin_C;PF01357.24^DPBB_1;PF03330.21	2	2	3
OG00853	90	TLP1_PRUPE;Thaumatin-like protein 1	Thaumatin;PF00314.20	3	4	5
OG00854	90	DTX27_ARATH;Protein DETOXIFICATION 27 {ECO:0000303|PubMed:11739388}	MatE;PF01554.21	8	6	16
OG00855	90	ALFP_ORYSJ;Fructose-bisphosphate aldolase chloroplastic {ECO:0000305}	Glycolytic;PF00274.22	3	3	4
OG00856	90	MSSP3_ARATH;Monosaccharide-sensing protein 3 {ECO:0000305}	MFS_1;PF07690.19^Sugar_tr;PF00083.27	3	4	5
OG00857	90	WRK41_ARATH;Probable WRKY transcription factor 41	WRKY;PF03106.18	2	2	5
OG00858	90	HPPA_FUSNN;Putative K(+)-stimulated pyrophosphate-energized sodium pump {ECO:0000255|HAMAP-Rule:MF_01129}	H_PPase;PF03030.19	3	4	6
OG00859	90	RS15A_HUMAN;Small ribosomal subunit protein uS8 {ECO:0000303|PubMed:24524803}	Ribosomal_S8;PF00410.22	2	2	3
OG00860	90	Y3028_ARATH;Uncharacterized acetyltransferase At3g50280	Transferase;PF02458.18	2	2	3
OG00861	90	TRI1_YEAST;Protein TRI1	SWIB;PF02201.21	4	4	6
OG00862	90	DEGP2_ARATH;Protease Do-like 2 chloroplastic	Trypsin_2;PF13365.9^PDZ_3;PF17815.4^Trypsin;PF00089.29^PDZ_2;PF13180.9	4	3	5
OG00863	90	SBT51_ARATH;Subtilisin-like protease SBT5.1 {ECO:0000303|PubMed:16193095}	Peptidase_S8;PF00082.25^fn3_6;PF17766.4^Inhibitor_I9;PF05922.19^PA;PF02225.25	2	2	2
OG00864	90	E134_ARATH;Glucan endo-13-beta-glucosidase 4	X8;PF07983.16	3	4	7
OG00865	90	NA	mTERF;PF02536.17	1	0	1
OG00866	90	NHX3_ARATH;Sodium/hydrogen exchanger 3	Na_H_Exchanger;PF00999.24	4	4	7
OG00867	90	SNAK2_SOLTU;Snakin-2	GASA;PF02704.17	6	6	7
OG00868	90	EIN3_ARATH;Protein ETHYLENE INSENSITIVE 3 {ECO:0000303|PubMed:9215635}	EIN3;PF04873.16	2	2	4
OG00869	90	Y1675_ARATH;G-type lectin S-receptor-like serine/threonine-protein kinase At1g67520	PK_Tyr_Ser-Thr;PF07714.20^Pkinase;PF00069.28^B_lectin;PF01453.27^PAN_2;PF08276.14^ABC1;PF03109.19^DUF3403;PF11883.11^Pkinase_fungal;PF17667.4^Haspin_kinase;PF12330.11	2	1	3
OG00870	90	PMT4_TOBAC;Putrescine N-methyltransferase 4 {ECO:0000303|PubMed:10598105}	Spermine_synth;PF01564.20^Spermine_synt_N;PF17284.5	2	2	4
OG00871	90	RS13_MOUSE;Small ribosomal subunit protein uS15 {ECO:0000305}	Ribosomal_S13_N;PF08069.15^Ribosomal_S15;PF00312.25	3	2	5
OG00872	90	HOX22_ORYSJ;Homeobox-leucine zipper protein HOX22	HALZ;PF02183.21^Homeodomain;PF00046.32	2	3	3
OG00873	90	NRP32_POPTR;Metal transporter Nramp3.2 {ECO:0000303|PubMed:20623158 ECO:0000303|PubMed:35700212}	Nramp;PF01566.21	3	4	4
OG00874	90	PSAA_COFAR;Photosystem I P700 chlorophyll a apoprotein A1 {ECO:0000255|HAMAP-Rule:MF_00458}	PsaA_PsaB;PF00223.22	2	0	0
OG00875	90	C7263_MEDTR;11-oxo-beta-amyrin 30-oxidase	PMD;PF10536.12	1	1	1
OG00876	90	FB49_ARATH;F-box protein At1g49360	NA	1	2	2
OG00878	90	RGA2_SOLBU;Disease resistance protein RGA2	LRR_4;PF12799.10^LRR_8;PF13855.9^NB-ARC;PF00931.25^Rx_N;PF18052.4^AAA_22;PF13401.9	46	13	29
OG00881	89	PER52_ARATH;Peroxidase 52	peroxidase;PF00141.26	3	3	5
OG00882	89	NUD17_ARATH;Nudix hydrolase 17 mitochondrial	NUDIX;PF00293.31	3	3	6
OG00883	89	UBP16_ARATH;Ubiquitin carboxyl-terminal hydrolase 16	UCH;PF00443.32^UCH_1;PF13423.9^zf-MYND;PF01753.21	2	3	5
OG00884	89	PAH2_ARATH;Phosphatidate phosphatase PAH2	LNS2;PF08235.16^Lipin_N;PF04571.17^Lipin_mid;PF16876.8	3	2	4
OG00885	89	ALE2_ARATH;Receptor-like serine/threonine-protein kinase ALE2	Pkinase;PF00069.28^PK_Tyr_Ser-Thr;PF07714.20	3	3	5
OG00886	89	PR1B3_ARATH;PRA1 family protein B3	PRA1;PF03208.22	4	3	6
OG00887	89	RL30_BOVIN;Large ribosomal subunit protein eL30 {ECO:0000305}	Ribosomal_L7Ae;PF01248.29	2	2	2
OG00888	89	NA	DUF547;PF04784.17^Lzipper-MIP1;PF14389.9	3	4	3
OG00889	89	SEOB_ARATH;Protein SIEVE ELEMENT OCCLUSION B {ECO:0000303|PubMed:20932300}	SEO_C;PF14577.9^SEO_N;PF14576.9	4	3	8
OG00890	89	RNHX1_ARATH;Putative ribonuclease H protein At1g65750	RVT_3;PF13456.9^zf-RVT;PF13966.9	1	1	2
OG00891	89	CSK23_HUMAN;Casein kinase II subunit alpha 3	Pkinase;PF00069.28^PK_Tyr_Ser-Thr;PF07714.20^APH;PF01636.26	3	3	4
OG00892	89	DCEC_LISIN;Probable glutamate decarboxylase gamma	Pyridoxal_deC;PF00282.22	4	4	7
OG00894	89	NA	DUF538;PF04398.15	2	4	6
OG00895	89	SUVR2_ARATH;Probable inactive histone-lysine N-methyltransferase SUVR2	WIYLD;PF10440.12^Pre-SET;PF05033.19^SET;PF00856.31^CinA_KH;PF18146.4^DUF1133;PF06576.14^T3SS_ATPase_C;PF18269.4^FlaC_arch;PF05377.14	4	5	5
OG00896	89	DGR2_ARATH;Protein DUF642 L-GALACTONO-14-LACTONE-RESPONSIVE GENE 2 {ECO:0000303|PubMed:22323769}	DUF642;PF04862.15	3	3	7
OG00897	89	CNBL9_ARATH;Calcineurin B-like protein 9	EF-hand_6;PF13405.9^EF-hand_1;PF00036.35^EF-hand_5;PF13202.9^EF-hand_7;PF13499.9^EF-hand_8;PF13833.9	4	4	6
OG00898	89	C3H30_ARATH;Zinc finger CCCH domain-containing protein 30	Ank;PF00023.33^Ank_3;PF13606.9^Ank_4;PF13637.9^Ank_5;PF13857.9^Ank_2;PF12796.10	2	2	3
OG00899	89	NOI4_ARATH;Protein NOI4 {ECO:0000303|PubMed:15845764}	AvrRpt-cleavage;PF05627.14	2	3	6
OG00900	89	PHO32_ARATH;Universal stress protein PHOS32 {ECO:0000303|PubMed:12644671}	Usp;PF00582.29	3	3	4
OG00901	89	KS1_ORYSJ;Ent-kaur-16-ene synthase chloroplastic	Terpene_synth_C;PF03936.19^Terpene_synth;PF01397.24^Terpene_syn_C_2;PF19086.3	5	3	7
OG00902	89	STY46_ARATH;Serine/threonine-protein kinase STY46 {ECO:0000305}	PK_Tyr_Ser-Thr;PF07714.20^Pkinase;PF00069.28^ABC1;PF03109.19^ACT;PF01842.28	3	3	3
OG00903	89	NACA_PINTA;Nascent polypeptide-associated complex subunit alpha-like protein	HYPK_UBA;PF19026.3^NAC;PF01849.21	5	3	4
OG00904	89	P4KG3_ARATH;Phosphatidylinositol 4-kinase gamma 3	ubiquitin;PF00240.26^PI3_PI4_kinase;PF00454.30^Rad60-SLD;PF11976.11	3	3	4
OG00906	89	TM2NV_SOLLC;ToMV resistant protein Tm-2 netted virescent {ECO:0000303|Ref.1 ECO:0000303|Ref.2}	NB-ARC;PF00931.25^NB-LRR;PF12061.11	17	37	35
OG00908	88	NA	NA	1	3	2
OG00909	88	Y5780_ARATH;BTB/POZ domain-containing protein At5g47800	NPH3;PF03000.17^BTB;PF00651.34	2	2	4
OG00910	88	AB17C_XENLA;Alpha/beta hydrolase domain-containing protein 17C {ECO:0000305}	Hydrolase_4;PF12146.11^Abhydrolase_1;PF00561.23^Peptidase_S9;PF00326.24	3	3	5
OG00911	88	JUGR4_JUGRE;11S globulin seed storage protein Jug r 4 {ECO:0000305}	Cupin_1;PF00190.25^Cupin_2;PF07883.14	3	1	2
OG00912	88	RCI2B_ARATH;Hydrophobic protein RCI2B	Pmp3;PF01679.20	1	3	5
OG00913	88	ATB13_ARATH;Homeobox-leucine zipper protein ATHB-13	Homeodomain;PF00046.32^HALZ;PF02183.21	2	2	3
OG00914	88	XDH_CHICK;Xanthine dehydrogenase/oxidase	MoCoBD_2;PF20256.1^MoCoBD_1;PF02738.21^Ald_Xan_dh_C;PF01315.25^FAD_binding_5;PF00941.24^CO_deh_flav_C;PF03450.20^Fer2_2;PF01799.23^Fer2;PF00111.30	10	5	10
OG00915	88	G3PC_PETCR;Glyceraldehyde-3-phosphate dehydrogenase cytosolic	Gp_dh_N;PF00044.27^Gp_dh_C;PF02800.23	2	2	2
OG00916	88	DI193_ARATH;Protein DEHYDRATION-INDUCED 19 homolog 3	Di19_C;PF14571.9^zf-Di19;PF05605.15	3	2	4
OG00917	88	YIPL4_ARATH;Protein yippee-like At3g55890	Yippee-Mis18;PF03226.17	2	4	7
OG00918	88	FB333_ARATH;Probable F-box protein At4g22030	Chloroplast_duf;PF14476.9	7	5	7
OG00919	88	PGLR_VITVI;Probable polygalacturonase	Pectate_lyase_3;PF12708.10^Glyco_hydro_28;PF00295.20	2	2	3
OG00920	88	SNF4_ARATH;Sucrose nonfermenting 4-like protein	CBS;PF00571.31^AMPK1_CBM;PF16561.8	3	4	6
OG00921	88	2ODD_SINHE;Deoxypodophyllotoxin synthase {ECO:0000303|PubMed:26359402}	2OG-FeII_Oxy;PF03171.23^DIOX_N;PF14226.9	7	10	11
OG00922	88	1A11_CUCPE;1-aminocyclopropane-1-carboxylate synthase 1	Aminotran_1_2;PF00155.24	3	4	5
OG00923	88	ENL14_ARATH;Early nodulin-like protein 14 {ECO:0000303|PubMed:19897921}	Cu_bind_like;PF02298.20	2	2	3
OG00924	88	IQD1_ARATH;Protein IQ-DOMAIN 1 {ECO:0000303|PubMed:15960618}	NA	2	3	2
OG00925	88	PRPX_HORVU;Pathogen-related protein	NA	3	5	6
OG00931	87	UGDH_RAT;UDP-glucose 6-dehydrogenase	UDPG_MGDP_dh_C;PF03720.18^UDPG_MGDP_dh_N;PF03721.17^UDPG_MGDP_dh;PF00984.22	3	4	4
OG00932	87	KCS19_ARATH;3-ketoacyl-CoA synthase 19 {ECO:0000303|PubMed:18465198}	ACP_syn_III_C;PF08541.13^FAE1_CUT1_RppA;PF08392.15^Chal_sti_synt_C;PF02797.18	3	5	6
OG00933	87	LYPA1_PONAB;Acyl-protein thioesterase 1	Abhydrolase_2;PF02230.19^FSH1;PF03959.16^Hydrolase_4;PF12146.11	4	3	6
OG00934	87	CCA21_ORYSJ;Cyclin-A2-1	Cyclin_N;PF00134.26^Cyclin_C;PF02984.22	2	3	2
OG00935	87	MO25N_ARATH;Putative MO25-like protein At5g47540	Mo25;PF08569.14	4	3	6
OG00936	87	FBK50_ARATH;F-box/kelch-repeat protein At3g06240	FBA_1;PF07734.16^F-box;PF00646.36^FBA_3;PF08268.15^F-box-like;PF12937.10	3	9	12
OG00937	87	CUL1_HUMAN;Cullin-1	Cullin;PF00888.25^Cullin_Nedd8;PF10557.12	2	3	5
OG00938	87	Y2626_ARATH;BTB/POZ domain-containing protein At2g46260	BACK;PF07707.18^BTB;PF00651.34	2	2	4
OG00939	87	GLYT6_ARATH;Probable glycosyltransferase At5g25310	Exostosin;PF03016.18	2	2	2
OG00940	87	OXS3_ARATH;Protein OXIDATIVE STRESS 3 {ECO:0000303|PubMed:18980652}	NA	3	3	6
OG00941	87	GSTU8_ARATH;Glutathione S-transferase U8	GST_N;PF02798.23^GST_N_2;PF13409.9^GST_N_3;PF13417.9^GST_C;PF00043.28	6	5	10
OG00942	87	G3OX_PEA;Gibberellin 3-beta-dioxygenase 1	2OG-FeII_Oxy;PF03171.23^DIOX_N;PF14226.9	3	5	8
OG00943	87	APY_SOLTU;Apyrase	GDA1_CD39;PF01150.20	4	4	8
OG00944	87	STORR_PAPSO;Bifunctional protein STORR {ECO:0000303|PubMed:26113639}	Aldo_ket_red;PF00248.24	6	6	7
OG00945	87	POL2_DROME;Retrovirus-related Pol polyprotein from transposon 297	RVT_3;PF13456.9^Integrase_H2C2;PF17921.4^RT_RNaseH_2;PF17919.4^RT_RNaseH;PF17917.4^RVT_1;PF00078.30^rve;PF00665.29^RNase_H;PF00075.27	0	0	3
OG00947	86	DRM2_ORYSJ;DNA (cytosine-5)-methyltransferase DRM2 {ECO:0000305}	DNA_methylase;PF00145.20	4	3	5
OG00948	86	HCT1_ACTRA;Hydroxycinnamoyl-CoA:piscidic acid hydroxycinnamoyltransferase {ECO:0000303|PubMed:31069522}	Transferase;PF02458.18	3	7	10
OG00949	86	SHL_ARATH;Chromatin remodeling protein SHL {ECO:0000305}	BAH;PF01426.21^PHD;PF00628.32	3	3	5
OG00950	86	PPA7_ARATH;Purple acid phosphatase 7	Metallophos;PF00149.31	3	3	6
OG00951	86	XGAT3_POPTR;Xyloglucan O-acetyltransferase 3 {ECO:0000303|PubMed:30083810}	PC-Esterase;PF13839.9^PMR5N;PF14416.9	4	6	12
OG00952	86	PPSP2_ARATH;Inorganic pyrophosphatase 2	Put_Phosphatase;PF06888.15^HAD;PF12710.10	2	2	3
OG00953	86	PI5K4_ARATH;Phosphatidylinositol 4-phosphate 5-kinase 4	MORN;PF02493.23^PIP5K;PF01504.21	2	2	4
OG00954	86	CAAT8_ARATH;Cationic amino acid transporter 8 vacuolar	AA_permease_C;PF13906.9^AA_permease_2;PF13520.9^AA_permease;PF00324.24	3	4	8
OG00955	86	UCKA_DICDI;Uridine-cytidine kinase A	UPRTase;PF14681.9^PRK;PF00485.21	2	4	2
OG00956	86	R18A3_ARATH;Large ribosomal subunit protein eL20x {ECO:0000303|PubMed:36423343}	Ribosomal_L18A;PF01775.20	1	1	2
OG00957	86	TBL4_ARATH;Protein trichome birefringence-like 4	PC-Esterase;PF13839.9^PMR5N;PF14416.9	2	2	3
OG00958	86	ADHL1_ARATH;Alcohol dehydrogenase-like 1	ADH_N;PF08240.15^ADH_zinc_N;PF00107.29	11	10	12
OG00959	86	TMK4_ARATH;Receptor-like kinase TMK4 {ECO:0000303|PubMed:23613767}	LRR_4;PF12799.10^LRR_8;PF13855.9^Pkinase;PF00069.28^PK_Tyr_Ser-Thr;PF07714.20^LRRNT_2;PF08263.15^LRR_1;PF00560.36^PPR;PF01535.23^PPR_2;PF13041.9^PPR_1;PF12854.10	2	3	5
OG00960	86	AOP2V_ARATH;2-oxoglutarate-dependent dioxygenase AOP2	2OG-FeII_Oxy;PF03171.23^DIOX_N;PF14226.9	3	3	7
OG00961	86	Y1648_ARATH;Uncharacterized protein At1g66480	PADRE;PF14009.9	2	2	4
OG00962	86	PPP7L_ARATH;Serine/threonine-protein phosphatase 7 long form homolog	PMD;PF10536.12	0	0	1
OG00963	85	IDD4_ARATH;Protein indeterminate-domain 4 chloroplastic {ECO:0000303|PubMed:16784536}	zf-C2H2;PF00096.29	3	3	6
OG00964	85	FMO1_ARATH;Probable flavin-containing monooxygenase 1	Pyr_redox_3;PF13738.9^FMO-like;PF00743.22^Pyr_redox_2;PF07992.17^Lys_Orn_oxgnase;PF13434.9^NAD_binding_8;PF13450.9	2	1	3
OG00965	85	TFL1_ARATH;Protein TERMINAL FLOWER 1	PBP;PF01161.23	3	4	5
OG00966	85	ZHD2_ARATH;Zinc-finger homeodomain protein 2	ZF-HD_dimer;PF04770.15	3	2	2
OG00967	85	NA	VARLMGL;PF14383.9^DUF4378;PF14309.9	1	1	2
OG00968	85	VTI13_ARATH;Vesicle transport v-SNARE 13 {ECO:0000303|PubMed:24737717}	V-SNARE_C;PF12352.11^V-SNARE;PF05008.18^Sec20;PF03908.16	3	3	5
OG00969	85	RL192_ARATH;Large ribosomal subunit protein eL19z {ECO:0000303|PubMed:36423343}	Ribosomal_L19e;PF01280.23	3	3	6
OG00970	85	ERF1Z_BRAOB;Eukaryotic peptide chain release factor subunit 1-3 {ECO:0000305}	eRF1_2;PF03464.18^eRF1_3;PF03465.18^eRF1_1;PF03463.18	2	3	4
OG00971	85	PYL10_ORYSJ;Abscisic acid receptor PYL10 {ECO:0000305}	Polyketide_cyc2;PF10604.12	1	1	2
OG00972	85	IRT1_ARATH;Fe(2+) transport protein 1	Zip;PF02535.25	2	2	5
OG00973	85	Y5614_ARATH;Probable LRR receptor-like serine/threonine-protein kinase At1g56140	LRR_8;PF13855.9^LRR_4;PF12799.10^PK_Tyr_Ser-Thr;PF07714.20^Pkinase;PF00069.28^Malectin;PF11721.11^LRR_1;PF00560.36	1	1	2
OG00974	85	HIDM_GLYEC;2-hydroxyisoflavanone dehydratase	Abhydrolase_3;PF07859.16^BD-FAE;PF20434.1^COesterase;PF00135.31^Say1_Mug180;PF10340.12	4	4	8
OG00975	85	CHX20_ARATH;Cation/H(+) antiporter 20	Na_H_Exchanger;PF00999.24	2	2	2
OG00976	85	Y1725_ARATH;Putative receptor-like protein kinase At1g72540	PK_Tyr_Ser-Thr;PF07714.20^Pkinase;PF00069.28	2	3	3
OG00977	85	TSR2_MOUSE;Pre-rRNA-processing protein TSR2 homolog	WGG;PF10273.12	2	2	5
OG00978	85	HIRL2_ORYSJ;Hypersensitive-induced response protein-like protein 2	Band_7;PF01145.28	3	3	5
OG00979	85	H2AZ_CHICK;Histone H2A.Z	Histone;PF00125.27^Histone_H2A_C;PF16211.8	3	3	4
OG00980	85	ASK13_ARATH;SKP1-like protein 13	Skp1;PF01466.22^Skp1_POZ;PF03931.18	1	1	2
OG00981	85	AI5L6_ARATH;ABSCISIC ACID-INSENSITIVE 5-like protein 6	bZIP_1;PF00170.24^bZIP_2;PF07716.18	2	2	5
OG00982	85	RNS1_ARATH;Ribonuclease 1	Ribonuclease_T2;PF00445.21	5	4	8
OG00983	85	DEF19_ARATH;Defensin-like protein 19	Gamma-thionin;PF00304.23	4	6	9
OG00984	85	FBK67_ARATH;F-box/kelch-repeat protein At3g23880	F-box;PF00646.36^F-box-like;PF12937.10^FBA_1;PF07734.16^FBA_3;PF08268.15	2	10	18
OG00985	85	ZMYM1_HUMAN;Zinc finger MYM-type protein 1	DUF4371;PF14291.9^Dimer_Tnp_hAT;PF05699.17^LRR_8;PF13855.9^LRR_4;PF12799.10	1	21	27
OG00986	85	5MAT2_SALSN;Pelargonidin 3-O-(6-caffeoylglucoside) 5-O-(6-O-malonylglucoside) 4'''-malonyltransferase	Transferase;PF02458.18	1	2	1
OG00988	84	CKL2_ARATH;Casein kinase 1-like protein 2 {ECO:0000305}	Pkinase;PF00069.28^PK_Tyr_Ser-Thr;PF07714.20^Pkinase_fungal;PF17667.4	2	2	2
OG00989	84	BH143_ARATH;Transcription factor bHLH143	NA	2	2	4
OG00990	84	2A5A_MOUSE;Serine/threonine-protein phosphatase 2A 56 kDa regulatory subunit alpha isoform	B56;PF01603.23	1	2	3
OG00991	84	AHL7_ARATH;AT-hook motif nuclear-localized protein 7 {ECO:0000312|EMBL:FAA00278.1}	PCC;PF03479.18	2	2	4
OG00992	84	BAK1_ARATH;BRASSINOSTEROID INSENSITIVE 1-associated receptor kinase 1 {ECO:0000303|PubMed:12150929}	LRR_8;PF13855.9^LRR_4;PF12799.10^Pkinase;PF00069.28^PK_Tyr_Ser-Thr;PF07714.20^LRRNT_2;PF08263.15^LRR_1;PF00560.36	3	3	5
OG00993	84	RHM3_ARATH;Trifunctional UDP-glucose 46-dehydratase/UDP-4-keto-6-deoxy-D-glucose 35-epimerase/UDP-4-keto-L-rhamnose-reductase RHM3 {ECO:0000305|PubMed:17190829}	GDP_Man_Dehyd;PF16363.8^Epimerase;PF01370.24^NAD_binding_4;PF07993.15^RmlD_sub_bind;PF04321.20^Polysacc_synt_2;PF02719.18^3Beta_HSD;PF01073.22	3	2	3
OG00994	84	ACP2_HORVU;Acyl carrier protein 2 chloroplastic	PP-binding;PF00550.28^PP-binding_2;PF14573.9	3	4	6
OG00995	84	KPYM_HUMAN;Pyruvate kinase PKM	PK_C;PF02887.19^PK;PF00224.24	3	3	6
OG00996	84	M860_ARATH;Uncharacterized mitochondrial protein AtMg00860	RT_RNaseH_2;PF17919.4^RVT_1;PF00078.30^RT_RNaseH;PF17917.4	0	5	10
OG00997	84	OSS2_PEA;Organ-specific protein S2	Organ_specific;PF10950.11^Chordopox_A13L;PF05961.14^DUF4246;PF14033.9^GST_C_3;PF14497.9	3	8	9
OG00998	84	MYB75_ARATH;Transcription factor MYB75	Myb_DNA-binding;PF00249.34^Myb_DNA-bind_6;PF13921.9	1	1	3
OG00999	84	U2AF1_MOUSE;Splicing factor U2AF 35 kDa subunit	zf-CCCH;PF00642.27^RRM_1;PF00076.25	3	3	3
OG01000	84	H2AXA_ORYSI;Probable histone H2AXa	Histone_H2A_C;PF16211.8^Histone;PF00125.27	3	3	6
OG01001	84	Y2837_ARATH;WEB family protein At2g38370	WEMBL;PF05701.14	2	2	4
OG01002	84	Y1490_ARATH;Hypothetical protein At1g04090	Vps62;PF06101.14	5	5	10
OG01003	84	CBP22_HORVU;Serine carboxypeptidase II-2	Peptidase_S10;PF00450.25	7	7	12
OG01004	84	GDL52_ARATH;GDSL esterase/lipase At3g14820	Lipase_GDSL;PF00657.25	2	1	0
OG01005	84	P24D3_ARATH;Transmembrane emp24 domain-containing protein p24delta3	EMP24_GP25L;PF01105.27	2	2	4
OG01006	84	M313B_XENLA;Mitogen-activated protein kinase kinase kinase 13-B	PK_Tyr_Ser-Thr;PF07714.20^Pkinase;PF00069.28^PB1;PF00564.27	3	4	7
OG01007	84	HMGYA_SOYBN;HMG-Y-related protein A	Linker_histone;PF00538.22	3	3	5
OG01008	84	CHSJ_PETHY;Chalcone synthase J	Chal_sti_synt_C;PF02797.18^Chal_sti_synt_N;PF00195.22^ACP_syn_III_C;PF08541.13^FAE1_CUT1_RppA;PF08392.15^ACP_syn_III;PF08545.13	2	6	7
OG01009	84	EPHX3_HUMAN;Epoxide hydrolase 3	Hydrolase_4;PF12146.11^Abhydrolase_1;PF00561.23^Abhydrolase_6;PF12697.10^Chlorophyllase2;PF12740.10^Chlorophyllase;PF07224.14	3	4	6
OG01010	84	RK2_NICSY;Large ribosomal subunit protein uL2cz/uL2cy {ECO:0000255|HAMAP-Rule:MF_01320}	Ribosomal_L2_C;PF03947.21^Ribosomal_L2;PF00181.26	2	1	2
OG01011	84	KEA6_ARATH;K(+) efflux antiporter 6 {ECO:0000303|PubMed:11500563}	Na_H_Exchanger;PF00999.24	3	3	4
OG01012	84	RD22_ARATH;BURP domain protein RD22 {ECO:0000303|PubMed:9790599}	BURP;PF03181.18	17	11	20
OG01013	84	Y4095_ARATH;Uncharacterized protein At4g00950	NA	2	2	3
OG01014	84	VESTR_MEDSA;Vestitone reductase	Epimerase;PF01370.24^3Beta_HSD;PF01073.22^GDP_Man_Dehyd;PF16363.8^NAD_binding_4;PF07993.15^NAD_binding_10;PF13460.9^NmrA;PF05368.16	2	3	5
OG01015	84	NA	PMD;PF10536.12	2	7	28
OG01017	84	R13L1_ARATH;Putative disease resistance RPP13-like protein 1	LRR_4;PF12799.10^NB-ARC;PF00931.25^Rx_N;PF18052.4^LRR_8;PF13855.9^AAA_16;PF13191.9	4	3	3
OG01018	84	CBPR_HEVBR;Citrate-binding protein	Alginate_lyase2;PF08787.14	13	18	23
OG01022	83	Y3264_ARATH;Putative UPF0481 protein At3g02645	DUF247;PF03140.18^PPR;PF01535.23^PPR_2;PF13041.9^PPR_1;PF12854.10	4	3	6
OG01023	83	MLO10_ARATH;MLO-like protein 10	Mlo;PF03094.18	3	3	4
OG01024	83	PT153_ARATH;Probable sugar phosphate/phosphate translocator At1g53660	TPT;PF03151.19^UAA;PF08449.14	2	2	4
OG01025	83	MT2Z_SOLLC;Metallothionein-like protein type 2	Metallothio_2;PF01439.21	4	4	2
OG01026	83	OPF13_ARATH;Transcription repressor OFP13	Ovate;PF04844.16	2	2	3
OG01027	83	RHF2A_ARATH;E3 ubiquitin-protein ligase RHF2A {ECO:0000305}	zf-RING_2;PF13639.9^zf-rbx1;PF12678.10^zf-C3HC4_2;PF13923.9^zf-RING_11;PF17123.8^zf-C3HC4;PF00097.28	2	2	2
OG01028	83	FLZ6_ARATH;FCS-Like Zinc finger 6 {ECO:0000303|PubMed:24901469}	zf-FLZ;PF04570.17	2	2	3
OG01029	83	RL241_ARATH;Large ribosomal subunit protein eL24z {ECO:0000303|PubMed:36423343}	Ribosomal_L24e;PF01246.23	4	4	5
OG01030	83	1A12_CUCPE;1-aminocyclopropane-1-carboxylate synthase 2	Aminotran_1_2;PF00155.24	2	2	4
OG01031	83	VLG_ARATH;Protein VACUOLELESS GAMETOPHYTES {ECO:0000303|PubMed:28107777}	C1_2;PF03107.19^C1_1;PF00130.25^PHD;PF00628.32	2	6	4
OG01032	83	SHN2_ARATH;Ethylene-responsive transcription factor SHINE 2	AP2;PF00847.23	3	3	6
OG01033	83	PPCK2_ARATH;Phosphoenolpyruvate carboxylase kinase 2	Pkinase;PF00069.28^PK_Tyr_Ser-Thr;PF07714.20^Kinase-like;PF14531.9	3	1	3
OG01034	83	NAC83_ARATH;NAC domain-containing protein 83 {ECO:0000303|PubMed:15029955}	NAM;PF02365.18	2	2	4
OG01035	83	CRK42_ARATH;Cysteine-rich receptor-like protein kinase 42	Stress-antifung;PF01657.20^Pkinase;PF00069.28^PK_Tyr_Ser-Thr;PF07714.20	1	1	1
OG01036	83	NA	DUF3755;PF12579.11	2	2	4
OG01037	83	PLY12_ARATH;Probable pectate lyase 12	Pectate_lyase_4;PF00544.22^Pec_lyase_N;PF04431.16	2	3	5
OG01038	83	SAC8_ARATH;Phosphoinositide phosphatase SAC8	Syja_N;PF02383.21	3	2	4
OG01039	83	AB15G_ARATH;ABC transporter G family member 15	ABC2_membrane_7;PF19055.3^AAA_21;PF13304.9^ABC2_membrane;PF01061.27^ABC_tran;PF00005.30	3	4	6
OG01040	83	TPP9_ORYSJ;Probable trehalose-phosphate phosphatase 9	Trehalose_PPase;PF02358.19	2	2	4
OG01041	83	RAA5C_ARATH;Ras-related protein RABA5c	Ras;PF00071.25^Roc;PF08477.16^Arf;PF00025.24	3	3	6
OG01042	83	NA	NA	2	5	2
OG01043	83	CSK2B_XENLA;Casein kinase II subunit beta	CK_II_beta;PF01214.21	2	2	3
OG01044	83	PHO12_ARATH;Phosphate transporter PHO1 homolog 2	EXS;PF03124.17^SPX;PF03105.22	1	1	1
OG01045	83	NAC54_ORYSJ;NAC domain-containing protein 54 {ECO:0000303|PubMed:18813954}	NAM;PF02365.18	2	2	2
OG01046	83	CKX6_ORYSJ;Cytokinin dehydrogenase 6	FAD_binding_4;PF01565.26^Cytokin-bind;PF09265.13	2	2	5
OG01047	83	PABP2_ARATH;Polyadenylate-binding protein 2	RRM_1;PF00076.25^RRM_5;PF13893.9^RRM_occluded;PF16842.8^RRM_3;PF08777.14^RRM_7;PF16367.8^PABP;PF00658.21^Nup35_RRM;PF05172.16^Nup35_RRM_2;PF14605.9^SET_assoc;PF11767.11	3	3	5
OG01048	83	Y5586_ARATH;WEB family protein At5g55860	WEMBL;PF05701.14	3	3	5
OG01049	83	OCT3_ARATH;Organic cation/carnitine transporter 3	MFS_1;PF07690.19^Sugar_tr;PF00083.27	1	2	3
OG01050	83	KASC1_HORVU;3-oxoacyl-[acyl-carrier-protein] synthase I chloroplastic	ketoacyl-synt;PF00109.29^Ketoacyl-synt_C;PF02801.25	2	1	4
OG01051	83	MAIL2_ARATH;Protein MAIN-LIKE 2 {ECO:0000303|PubMed:24635680}	PMD;PF10536.12	2	3	3
OG01052	83	S404_ARATH;Protein S40-4 {ECO:0000303|PubMed:20238146}	Senescence_reg;PF04520.16	1	2	2
OG01053	83	C76A2_SOLME;Cytochrome P450 76A2	p450;PF00067.25	2	2	2
OG01054	83	HPCA1_ARATH;Leucine-rich repeat receptor protein kinase HPCA1 {ECO:0000305}	LRR_8;PF13855.9^LRR_4;PF12799.10^PK_Tyr_Ser-Thr;PF07714.20^Pkinase;PF00069.28	2	2	2
OG01055	83	PER44_ARATH;Peroxidase 44	peroxidase;PF00141.26	5	10	10
OG01057	83	FRS10_ARATH;Putative protein FAR1-RELATED SEQUENCE 10	MULE;PF10551.12^FAR1;PF03101.18	0	39	36
OG01058	83	YI31B_YEAST;Transposon Ty3-I Gag-Pol polyprotein	Retrotrans_gag;PF03732.20^Ty3_capsid;PF19259.2^RVP_2;PF08284.14^gag-asp_proteas;PF13975.9^RVT_1;PF00078.30	0	1	0
OG01062	82	RL72_ARATH;Large ribosomal subunit protein uL30y {ECO:0000303|PubMed:36423343}	Ribosomal_L30_N;PF08079.15^Ribosomal_L30;PF00327.23	2	2	6
OG01063	82	CAPP1_SORBI;Phosphoenolpyruvate carboxylase 1	PEPcase;PF00311.20	2	2	4
OG01064	82	PPA10_ARATH;Purple acid phosphatase 10	Metallophos;PF00149.31^Pur_ac_phosph_N;PF16656.8^Metallophos_C;PF14008.9	3	4	4
OG01065	82	MAKR4_ARATH;Probable membrane-associated kinase regulator 4	NA	2	2	4
OG01066	82	SERA_PANTR;D-3-phosphoglycerate dehydrogenase	PGDH_inter;PF19304.2^2-Hacid_dh_C;PF02826.22^2-Hacid_dh;PF00389.33^ACT;PF01842.28	3	3	6
OG01067	82	NLTP2_PRUAR;Non-specific lipid-transfer protein 2	LTP_2;PF14368.9	6	3	4
OG01068	82	RAH1C_ARATH;Ras-related protein RABH1c	Arf;PF00025.24^Ras;PF00071.25^Roc;PF08477.16	2	2	4
OG01069	82	H1_SOLLC;Histone H1	Linker_histone;PF00538.22	3	3	5
OG01070	82	DCAM_ORYSI;S-adenosylmethionine decarboxylase proenzyme	SAM_decarbox;PF01536.19^AdoMetDC_leader;PF08132.14	2	2	1
OG01071	82	GSTL2_ARATH;Glutathione S-transferase L2 chloroplastic	GST_N_3;PF13417.9^GST_N_2;PF13409.9^GST_C_2;PF13410.9^GST_N;PF02798.23^GST_C_5;PF16865.8	5	7	11
OG01072	82	NA	NA	2	2	5
OG01073	82	NA	NA	4	3	5
OG01074	82	WK72A_SOLLC;WRKY transcription factor 72A {ECO:0000305}	WRKY;PF03106.18	3	3	5
OG01075	82	AROF_CATRO;Probable phospho-2-dehydro-3-deoxyheptonate aldolase chloroplastic	DAHP_synth_2;PF01474.19	3	3	6
OG01076	82	C81Q2_SESRA;(+)-piperitol/(+)-sesamin synthase CYP81Q2 {ECO:0000305}	p450;PF00067.25	19	9	15
OG01077	82	AOX_AJECA;Alternative oxidase mitochondrial	AOX;PF01786.20	3	3	7
OG01078	82	OPT9_ARATH;Oligopeptide transporter 9	OPT;PF03169.18	5	6	8
OG01079	82	M3K1_ARATH;Mitogen-activated protein kinase kinase kinase 1	PK_Tyr_Ser-Thr;PF07714.20^Pkinase;PF00069.28	2	2	4
OG01080	82	ARAE1_ORYSJ;Probable UDP-arabinose 4-epimerase 1	GDP_Man_Dehyd;PF16363.8^Epimerase;PF01370.24^Polysacc_synt_2;PF02719.18^RmlD_sub_bind;PF04321.20^3Beta_HSD;PF01073.22^NAD_binding_10;PF13460.9^NAD_binding_4;PF07993.15	3	2	3
OG01081	82	BH093_ARATH;Transcription factor bHLH93	HLH;PF00010.29	2	2	4
OG01082	82	SCAM4_ORYSJ;Secretory carrier-associated membrane protein 4	SCAMP;PF04144.16	1	3	3
OG01083	82	BSPA_POPDE;Bark storage protein A	PNP_UDP_1;PF01048.23	11	9	15
OG01084	82	TCMO_RUTGR;Trans-cinnamate 4-monooxygenase	p450;PF00067.25	3	5	5
OG01085	82	BGAL3_ORYSJ;Beta-galactosidase 3	Glyco_hydro_35;PF01301.22^GHD;PF17834.4^Glyco_hydro_42;PF02449.18^Gal_Lectin;PF02140.21^BetaGal_dom4_5;PF13364.9	3	3	3
OG01086	82	JOX2_ARATH;Jasmonate-induced oxygenase 2 {ECO:0000303|PubMed:28559313}	2OG-FeII_Oxy;PF03171.23^DIOX_N;PF14226.9	4	3	7
OG01087	82	BH049_ARATH;Transcription factor bHLH49	NA	2	3	4
OG01088	82	VP322_ARATH;Vacuolar protein sorting-associated protein 32 homolog 2	Snf7;PF03357.24	1	2	1
OG01089	82	AAE2_ARATH;Isovalerate--CoA ligase AAE2 {ECO:0000303|PubMed:23300257}	AMP-binding;PF00501.31^AMP-binding_C;PF13193.9	2	2	4
OG01090	82	TMN5_ARATH;Transmembrane 9 superfamily member 5 {ECO:0000305}	EMP70;PF02990.19	3	4	6
OG01091	82	NA	Ank;PF00023.33^Ank_2;PF12796.10^Ank_5;PF13857.9^Ank_3;PF13606.9^Ank_4;PF13637.9^PGG;PF13962.9	9	26	26
OG01092	82	NLP4_ARATH;Protein NLP4	RWP-RK;PF02042.18^PB1;PF00564.27	29	11	17
OG01096	81	NAP1B_ORYSI;Nucleosome assembly protein 1;2	NAP;PF00956.21	2	2	3
OG01097	81	PPT1_CAEEL;Palmitoyl-protein thioesterase 1 {ECO:0000303|PubMed:15672447}	Palm_thioest;PF02089.18	3	3	5
OG01098	81	LBD27_ARATH;LOB domain-containing protein 27	LOB;PF03195.17	3	4	4
OG01099	81	NA	NA	2	3	5
OG01100	81	CSPL4_VITVI;CASP-like protein 1F1	CASP_dom;PF04535.15	2	3	5
OG01101	81	ALA4_ARATH;Probable phospholipid-transporting ATPase 4 {ECO:0000303|PubMed:11402198}	Hydrolase;PF00702.29^PhoLip_ATPase_C;PF16212.8^Cation_ATPase;PF13246.9^PhoLip_ATPase_N;PF16209.8	2	2	3
OG01102	81	TCP8_ARATH;Transcription factor TCP8	TCP;PF03634.16	2	2	4
OG01103	81	AFC2_ARATH;Serine/threonine-protein kinase AFC2	PK_Tyr_Ser-Thr;PF07714.20^Pkinase;PF00069.28	3	3	6
OG01104	81	RPOT2_ARATH;DNA-directed RNA polymerase 2 chloroplastic/mitochondrial	RNA_pol;PF00940.22^RPOL_N;PF14700.9	3	3	7
OG01105	81	CNGC2_ARATH;Cyclic nucleotide-gated ion channel 2	Ion_trans;PF00520.34^cNMP_binding;PF00027.32	3	3	3
OG01106	81	MAN2_SOLLC;Mannan endo-14-beta-mannosidase 2	Cellulase;PF00150.21	3	3	5
OG01107	81	RL15_MOUSE;Large ribosomal subunit protein eL15 {ECO:0000305}	Ribosomal_L15e;PF00827.20	2	3	4
OG01108	81	RL223_ARATH;Large ribosomal subunit protein eL22y {ECO:0000303|PubMed:36423343}	Ribosomal_L22e;PF01776.20	2	2	5
OG01109	81	SMXL3_ARATH;Protein SMAX1-LIKE 3 {ECO:0000303|PubMed:23893171}	Clp_N;PF02861.23	2	2	3
OG01110	81	RL92_ARATH;Large ribosomal subunit protein uL6x {ECO:0000303|PubMed:36423343}	Ribosomal_L6;PF00347.26	5	7	6
OG01111	81	MA653_ARATH;65-kDa microtubule-associated protein 3	MAP65_ASE1;PF03999.15	2	2	4
OG01112	81	HDG3_ARATH;Homeobox-leucine zipper protein HDG3 {ECO:0000303|PubMed:16778018}	START;PF01852.22^Homeodomain;PF00046.32	1	1	2
OG01113	81	TSAP1_RAT;tRNA selenocysteine 1-associated protein 1	RRM_1;PF00076.25^RRM_5;PF13893.9^RRM_7;PF16367.8	2	2	5
OG01114	81	NA	NA	2	2	4
OG01115	81	NFYB3_ARATH;Nuclear transcription factor Y subunit B-3 {ECO:0000303|PubMed:11250072 ECO:0000303|PubMed:11867211}	CBFD_NFYB_HMF;PF00808.26	2	2	6
OG01116	81	YP109_YEAST;ABC1 family protein YPL109C mitochondrial	ABC1;PF03109.19	2	2	3
OG01117	81	DNJB4_BOVIN;DnaJ homolog subfamily B member 4	DnaJ_C;PF01556.21^DnaJ;PF00226.34	3	3	5
OG01118	81	STEL_TOXVR;Stellacyanin	DUF868;PF05910.15	3	7	9
OG01119	81	GRXS3_ARATH;Monothiol glutaredoxin-S3	Glutaredoxin;PF00462.27	0	1	2
OG01120	81	CBK1_DEBHA;Serine/threonine-protein kinase CBK1	PK_Tyr_Ser-Thr;PF07714.20^Pkinase;PF00069.28	1	2	3
OG01121	81	INT2_ARATH;Probable inositol transporter 2	Sugar_tr;PF00083.27^MFS_1;PF07690.19^TRI12;PF06609.16^MFS_2;PF13347.9	4	6	7
OG01122	81	P2C46_ARATH;Probable protein phosphatase 2C 46 {ECO:0000303|PubMed:19021904}	PP2C;PF00481.24	2	2	3
OG01123	81	IRIS_CATRO;(S)-8-oxocitronellyl enol synthase {ECO:0000305}	NA	3	3	3
OG01124	81	LBD18_ARATH;LOB domain-containing protein 18	LOB;PF03195.17	2	2	4
OG01125	81	ENT2_ARATH;Equilibrative nucleotide transporter 2	Nucleoside_tran;PF01733.21	4	5	8
OG01126	81	QWRF2_ARATH;QWRF motif-containing protein 2	QWRF;PF04484.15	2	2	3
OG01127	81	Y8948_DICDI;Putative methyltransferase DDB_G0268948	Methyltransf_11;PF08241.15^Methyltransf_25;PF13649.9^Methyltransf_12;PF08242.15^Methyltransf_31;PF13847.9	7	9	12
OG01128	81	TAUE4_ARATH;Sulfite exporter TauE/SafE family protein 4 {ECO:0000312|EMBL:AEC09275.1}	TauE;PF01925.22	2	2	2
OG01129	81	ACTN_ACTDE;Actinidain {ECO:0000250|UniProtKB:P00785 ECO:0000312|EMBL:ABQ10189.1}	Granulin;PF00396.21^Inhibitor_I29;PF08246.15^Peptidase_C1;PF00112.26	2	2	6
OG01131	80	DNJ20_ARATH;Chaperone protein dnaJ 20 chloroplastic	DnaJ;PF00226.34	2	1	4
OG01132	80	DTX23_ARATH;Protein DETOXIFICATION 23 {ECO:0000303|PubMed:11739388}	MatE;PF01554.21	1	1	2
OG01133	80	KPYK_EIMTE;Pyruvate kinase	PK;PF00224.24^PK_C;PF02887.19	2	2	3
OG01134	80	NA	NA	3	2	4
OG01135	80	NA	FUSC_2;PF13515.9^FUSC;PF04632.15	4	5	5
OG01136	80	COBL1_ORYSJ;COBRA-like protein 1	COBRA;PF04833.18	4	4	8
OG01137	80	NA	VQ;PF05678.17	2	2	4
OG01138	80	MLO12_ARATH;MLO-like protein 12	Mlo;PF03094.18	2	2	2
OG01139	80	DEXH1_ARATH;DExH-box ATP-dependent RNA helicase DExH1 {ECO:0000305}	Helicase_C;PF00271.34^HA2;PF04408.26^OB_NTP_bind;PF07717.19^DEAD;PF00270.32^dsrm;PF00035.29	3	3	4
OG01140	80	AT8A2_HUMAN;Phospholipid-transporting ATPase IB {ECO:0000305|PubMed:31397519}	Hydrolase;PF00702.29^PhoLip_ATPase_C;PF16212.8^Cation_ATPase;PF13246.9^PhoLip_ATPase_N;PF16209.8^E1-E2_ATPase;PF00122.23	3	3	4
OG01141	80	BPA1_ARATH;Binding partner of ACD11 1 {ECO:0000303|PubMed:18845362}	RRM_1;PF00076.25	2	2	4
OG01142	80	RL112_ARATH;Large ribosomal subunit protein uL5y/uL5x/uL5w {ECO:0000303|PubMed:36423343}	Ribosomal_L5;PF00281.22^Ribosomal_L5_C;PF00673.24	1	1	2
OG01143	80	OFP6_ARATH;Transcription repressor OFP6	Ovate;PF04844.16	2	2	3
OG01144	80	PLY9_ARATH;Probable pectate lyase 9	Pectate_lyase_4;PF00544.22	2	2	3
OG01145	80	S14L5_HUMAN;SEC14-like protein 5	CRAL_TRIO;PF00650.23^CRAL_TRIO_2;PF13716.9	2	2	3
OG01146	80	CB60D_ARATH;Calmodulin-binding protein 60 D {ECO:0000303|PubMed:11782485}	Calmodulin_bind;PF07887.14^Calmod_bind_M;PF20451.1^Calmod_bind_C;PF20452.1	3	2	2
OG01147	80	NA	DUF620;PF04788.15	2	2	2
OG01148	80	GDIR_ARATH;Rho GDP-dissociation inhibitor 1	Rho_GDI;PF02115.20	2	2	4
OG01149	80	AGL80_ARATH;Agamous-like MADS-box protein AGL80	SRF-TF;PF00319.21	2	3	3
OG01151	80	GCR2_ARATH;LanC-like protein GCR2	LANC_like;PF05147.16	3	3	4
OG01152	80	CSLE2_ORYSJ;Cellulose synthase-like protein E2	Cellulose_synt;PF03552.17^EMP24_GP25L;PF01105.27	3	2	6
OG01153	80	SLD1_KLULA;Delta 8-(E)-sphingolipid desaturase {ECO:0000250|UniProtKB:Q8NKG8}	FA_desaturase;PF00487.27^Cyt-b5;PF00173.31	2	2	4
OG01154	80	DIV_ANTMA;Transcription factor DIVARICATA	Myb_DNA-binding;PF00249.34^Myb_DNA-bind_6;PF13921.9	2	2	4
OG01155	80	RL12_CANAL;Large ribosomal subunit protein uL11 {ECO:0000250|UniProtKB:P0CX53}	Ribosomal_L11;PF00298.22^Ribosomal_L11_N;PF03946.17	1	2	2
OG01156	80	LEA1_CICAR;Late embryogenesis abundant protein 1	NA	9	2	9
OG01157	80	C98A1_SORBI;Cytochrome P450 98A1	p450;PF00067.25	2	2	5
OG01158	80	BBX21_ARATH;B-box zinc finger protein 21 {ECO:0000303|PubMed:19920209}	zf-B_box;PF00643.27^CEBP_ZZ;PF16366.8	2	2	2
OG01160	80	NAC83_ARATH;NAC domain-containing protein 83 {ECO:0000303|PubMed:15029955}	NAM;PF02365.18	0	5	15
OG01161	80	NA	MULE;PF10551.12^SWIM;PF04434.20	0	0	7
OG01163	79	U87A1_ARATH;UDP-glycosyltransferase 87A1	UDPGT;PF00201.21	2	2	3
OG01164	79	RS23_MOUSE;Small ribosomal subunit protein uS12 {ECO:0000305}	Ribosom_S12_S23;PF00164.28	2	2	2
OG01165	79	LRK52_ARATH;Putative L-type lectin-domain containing receptor kinase V.2	DUF604;PF04646.15^Fringe;PF02434.19	2	2	3
OG01166	79	MGDG3_ORYSJ;Probable monogalactosyldiacylglycerol synthase 3 chloroplastic	MGDG_synth;PF06925.14^Glyco_tran_28_C;PF04101.19	2	2	4
OG01167	79	LIP2_ARATH;Triacylglycerol lipase 2	Hydrolase_4;PF12146.11^Abhydrolase_1;PF00561.23^Abhydro_lipase;PF04083.19^Esterase;PF00756.23^Abhydrolase_6;PF12697.10	4	4	5
OG01168	79	CNIH2_ARATH;Probable protein cornichon homolog 2	Cornichon;PF03311.17	2	2	4
OG01169	79	PRF1_SOLLC;36.4 kDa proline-rich protein	Hydrophob_seed;PF14547.9	3	3	4
OG01170	79	POT1_ARATH;Potassium transporter 1	K_trans;PF02705.19	3	2	3
OG01171	79	HOX1_ORYSI;Homeobox-leucine zipper protein HOX1	Homeodomain;PF00046.32^HALZ;PF02183.21	4	5	4
OG01172	79	EF4L4_ARATH;Protein ELF4-LIKE 4	Elf4;PF07011.14	2	2	3
OG01173	79	94D18_PARPY;Cytochrome P450 CYP94D108 {ECO:0000303|PubMed:31324795}	p450;PF00067.25	4	4	4
OG01174	79	RL34B_CANAL;Large ribosomal subunit protein eL34 {ECO:0000303|PubMed:35613268}	DUF1666;PF07891.15	2	2	3
OG01175	79	AFP3_ARATH;Ninja-family protein AFP3	TDBD;PF16135.8^EAR;PF07897.14^NINJA_B;PF16136.8	2	3	6
OG01176	79	HIP20_ARATH;Heavy metal-associated isoprenylated plant protein 20 {ECO:0000303|PubMed:21072340 ECO:0000303|PubMed:23368984}	HMA;PF00403.29	2	2	4
OG01177	79	PLY10_ARATH;Probable pectate lyase 10	Pectate_lyase_4;PF00544.22	2	2	2
OG01178	79	PPR7_ARATH;Putative pentatricopeptide repeat-containing protein At1g03510	NA	0	3	4
OG01179	79	HIP32_ARATH;Heavy metal-associated isoprenylated plant protein 32 {ECO:0000303|PubMed:21072340 ECO:0000303|PubMed:23368984}	HMA;PF00403.29	2	2	4
OG01180	79	ANGLT_ROSHC;Anthocyanidin 53-O-glucosyltransferase	UDPGT;PF00201.21	3	5	9
OG01181	79	PHO11_ARATH;Phosphate transporter PHO1 homolog 1	SPX;PF03105.22^EXS;PF03124.17	4	3	3
OG01182	79	CML44_ARATH;Probable calcium-binding protein CML44	EF-hand_6;PF13405.9^EF-hand_5;PF13202.9^EF-hand_1;PF00036.35^EF-hand_8;PF13833.9^EF-hand_7;PF13499.9^EF-hand_9;PF14658.9	4	2	7
OG01183	79	NA	NA	1	3	5
OG01184	79	PLA11_ARATH;Phospholipase A(1) DAD1 chloroplastic {ECO:0000305}	Lipase_3;PF01764.28	1	2	4
OG01185	79	TBC15_HUMAN;TBC1 domain family member 15	RabGAP-TBC;PF00566.21	2	2	1
OG01186	79	GH36_ARATH;Indole-3-acetic acid-amido synthetase GH3.6	GH3;PF03321.16	2	3	5
OG01187	79	DXS1_ORYSJ;1-deoxy-D-xylulose-5-phosphate synthase 1 chloroplastic	DXP_synthase_N;PF13292.9^Transket_pyr;PF02779.27^Transketolase_C;PF02780.23	3	4	6
OG01188	79	NA	NA	2	2	4
OG01189	79	ALKR4_ARATH;Probable aldo-keto reductase 4	Aldo_ket_red;PF00248.24	6	3	7
OG01190	79	FLZ2_ARATH;FCS-Like Zinc finger 2 {ECO:0000303|PubMed:24901469}	zf-FLZ;PF04570.17	2	2	2
OG01191	79	PGLR3_ARATH;Probable polygalacturonase At3g15720	Glyco_hydro_28;PF00295.20^Pectate_lyase_3;PF12708.10	1	1	2
OG01192	79	IQM6_ARATH;IQ domain-containing protein IQM6 {ECO:0000305}	NA	3	4	4
OG01193	79	ATX5_ARATH;Histone-lysine N-methyltransferase ATX5	zf-HC5HC2H_2;PF13832.9^zf-HC5HC2H;PF13771.9^PHD;PF00628.32^PHD_2;PF13831.9^SET;PF00856.31^PWWP;PF00855.20^LRR_8;PF13855.9^LRR_4;PF12799.10^LRR_1;PF00560.36	4	2	3
OG01194	79	CNGC7_ARATH;Putative cyclic nucleotide-gated ion channel 7	Ion_trans;PF00520.34^cNMP_binding;PF00027.32	2	2	3
OG01195	79	YIPL6_ARATH;Protein yippee-like At4g27745	Yippee-Mis18;PF03226.17	2	2	3
OG01196	79	U520_MOUSE;U5 small nuclear ribonucleoprotein 200 kDa helicase	DEAD;PF00270.32^Sec63;PF02889.19^ResIII;PF04851.18^Helicase_C;PF00271.34^AAA_22;PF13401.9^Helicase_PWI;PF18149.4^AAA_30;PF13604.9	4	4	7
OG01197	79	RBL_NICDE;Ribulose bisphosphate carboxylase large chain {ECO:0000255|HAMAP-Rule:MF_01338}	RuBisCO_large;PF00016.23^RuBisCO_large_N;PF02788.19	0	2	0
OG01198	79	FBK67_ARATH;F-box/kelch-repeat protein At3g23880	F-box;PF00646.36^F-box-like;PF12937.10^FBA_1;PF07734.16	2	3	4
OG01203	78	PHOX3_ARATH;Protein PHOX3 {ECO:0000303|PubMed:20856808}	TPR_2;PF07719.20^PB1;PF00564.27^TPR_11;PF13414.9^TPR_1;PF00515.31^TPR_19;PF14559.9	2	2	4
OG01204	78	AIRP2_ARATH;E3 ubiquitin-protein ligase AIRP2 {ECO:0000305}	zf-C3HC4_3;PF13920.9^zf-RING_2;PF13639.9^Prok-RING_4;PF14447.9^zf-C3HC4;PF00097.28	3	3	6
OG01205	78	RS3_HUMAN;Small ribosomal subunit protein uS3 {ECO:0000303|PubMed:24524803}	Ribosomal_S3_C;PF00189.23^KH_2;PF07650.20	2	2	3
OG01206	78	IX15L_ARATH;Protein IRX15-LIKE	Polysacc_synt_4;PF04669.16	2	2	4
OG01207	78	VQ22_ARATH;VQ motif-containing protein 22 {ECO:0000303|PubMed:22535423}	VQ;PF05678.17	0	1	1
OG01208	78	IQD26_ARATH;Protein IQ-domain 26 {ECO:0000303|PubMed:16368012}	IQ;PF00612.30^DUF4005;PF13178.9	2	2	4
OG01209	78	MYO3_ARATH;Myosin-3	IQ;PF00612.30^Myosin_head;PF00063.24	2	2	3
OG01210	78	CML2_ARATH;Calmodulin-like protein 2	EF-hand_1;PF00036.35^EF-hand_6;PF13405.9^EF-hand_5;PF13202.9^EF-hand_8;PF13833.9^EF-hand_7;PF13499.9^EF-hand_9;PF14658.9^EF-hand_4;PF12763.10^SPARC_Ca_bdg;PF10591.12^Dockerin_1;PF00404.21	2	3	3
OG01211	78	NA	PADRE;PF14009.9	2	2	4
OG01212	78	YUGF_BACSU;Uncharacterized hydrolase YugF	Abhydrolase_1;PF00561.23^Hydrolase_4;PF12146.11^Abhydrolase_6;PF12697.10^DLH;PF01738.21^Peptidase_S9;PF00326.24	3	4	6
OG01213	78	GDIB_MOUSE;Rab GDP dissociation inhibitor beta	GDI;PF00996.21	2	3	3
OG01214	78	BGL01_ARATH;Beta-glucosidase 1 {ECO:0000303|PubMed:15604686}	Glyco_hydro_1;PF00232.21^Cellulase;PF00150.21	7	10	11
OG01215	78	GLC_ARATH;Acyltransferase GLAUCE {ECO:0000303|PubMed:17965055 ECO:0000303|PubMed:22872756}	Transferase;PF02458.18	1	1	0
OG01216	78	GDL69_ARATH;GDSL esterase/lipase At5g03590	Lipase_GDSL;PF00657.25	2	3	7
OG01217	78	XB31_ARATH;Putative E3 ubiquitin-protein ligase XBAT31	Ank_5;PF13857.9^Ank_3;PF13606.9^Ank;PF00023.33^Ank_4;PF13637.9^Ank_2;PF12796.10	2	2	3
OG01218	78	E13L_TOBAC;Glucan endo-13-beta-glucosidase acidic isoform GL153	Glyco_hydro_17;PF00332.21	6	6	14
OG01219	78	GAE4_ARATH;UDP-glucuronate 4-epimerase 4	NA	2	1	2
OG01220	78	HPR3_ARATH;Glyoxylate/hydroxypyruvate reductase HPR3	2-Hacid_dh_C;PF02826.22^2-Hacid_dh;PF00389.33	2	2	3
OG01221	78	PGLR_SOLLC;Polygalacturonase-2	Glyco_hydro_28;PF00295.20^Pectate_lyase_3;PF12708.10	2	2	4
OG01222	78	PGK_NOSP7;Phosphoglycerate kinase {ECO:0000255|HAMAP-Rule:MF_00145}	PGK;PF00162.22	4	3	8
OG01223	78	NA	NA	3	3	5
OG01224	78	MPK17_ORYSJ;Mitogen-activated protein kinase 17	PK_Tyr_Ser-Thr;PF07714.20^Pkinase;PF00069.28^Kdo;PF06293.17	2	3	2
OG01225	78	ERF4_TOBAC;Ethylene-responsive transcription factor 4	AP2;PF00847.23	2	2	3
OG01226	78	ALFC6_ARATH;Fructose-bisphosphate aldolase 6 cytosolic {ECO:0000305}	Glycolytic;PF00274.22	3	3	3
OG01227	78	FRS11_ARATH;Protein FAR1-RELATED SEQUENCE 11	FAR1;PF03101.18^MULE;PF10551.12^SWIM;PF04434.20	0	4	7
OG01228	78	PTR51_ARATH;Protein NRT1/ PTR FAMILY 7.1	PTR2;PF00854.24^MFS_1;PF07690.19	2	2	3
OG01229	78	NA	NA	1	1	2
OG01230	78	WTR2_ARATH;WAT1-related protein At1g09380	EamA;PF00892.23	1	1	3
OG01231	78	AMI4G_ARATH;Probable amidase At4g34880 {ECO:0000305}	Amidase;PF01425.24	12	6	12
OG01232	78	CLC1_ARATH;Clathrin light chain 1	Clathrin_lg_ch;PF01086.20	2	2	3
OG01233	78	PUM4_ARATH;Pumilio homolog 4	PUF;PF00806.22^NABP;PF07990.15	2	2	4
OG01234	78	WSD3_ARATH;Wax ester synthase/diacylglycerol acyltransferase 3 {ECO:0000303|PubMed:18621978}	WS_DGAT_C;PF06974.16^WES_acyltransf;PF03007.19	1	1	1
OG01235	78	CDPKH_ORYSJ;Calcium-dependent protein kinase 17 {ECO:0000305}	EF-hand_1;PF00036.35^EF-hand_6;PF13405.9^EF-hand_8;PF13833.9^EF-hand_5;PF13202.9^EF-hand_7;PF13499.9^EF-hand_4;PF12763.10^EF-hand_9;PF14658.9^Pkinase;PF00069.28^PK_Tyr_Ser-Thr;PF07714.20	2	2	4
OG01236	78	DTX45_ARATH;Protein DETOXIFICATION 45 chloroplastic {ECO:0000303|PubMed:11739388}	MatE;PF01554.21^Polysacc_synt_C;PF14667.9	2	2	3
OG01237	78	PTR36_ARATH;Probable peptide/nitrate transporter At3g43790	MFS_1;PF07690.19^Sugar_tr;PF00083.27	3	2	4
OG01238	78	CHI2_TOBAC;Endochitinase B	Glyco_hydro_19;PF00182.22^Chitin_bind_1;PF00187.22	3	2	6
OG01242	77	KCS20_ARATH;3-ketoacyl-CoA synthase 20 {ECO:0000303|PubMed:18465198}	NA	2	2	3
OG01243	77	EPFL6_ARATH;EPIDERMAL PATTERNING FACTOR-like protein 6 {ECO:0000303|PubMed:19435754}	EPF;PF17181.7	2	2	3
OG01244	77	PER1_ORYSJ;Peroxidase 1	peroxidase;PF00141.26	3	3	5
OG01245	77	R35A4_ARATH;Large ribosomal subunit protein eL33x {ECO:0000303|PubMed:36423343}	Ribosomal_L35Ae;PF01247.21	3	3	5
OG01246	77	CAF1_SCHPO;Poly(A) ribonuclease pop2	CAF1;PF04857.23	2	2	2
OG01247	77	RL31_RAT;Large ribosomal subunit protein eL31 {ECO:0000305}	Ribosomal_L31e;PF01198.22	3	2	6
OG01248	77	CSLG3_ARATH;Cellulose synthase-like protein G3	Cellulose_synt;PF03552.17^Glyco_trans_2_3;PF13632.9	3	6	7
OG01249	77	ANL2_ARATH;Homeobox-leucine zipper protein ANTHOCYANINLESS 2 {ECO:0000303|PubMed:10402424}	START;PF01852.22^Homeodomain;PF00046.32	2	2	4
OG01250	77	SWT6A_ORYSI;Bidirectional sugar transporter SWEET6a	MtN3_slv;PF03083.19	4	3	6
OG01251	77	LNG1_ARATH;Protein LONGIFOLIA 1	DUF4378;PF14309.9^VARLMGL;PF14383.9	2	2	4
OG01252	77	ATHB6_ARATH;Homeobox-leucine zipper protein ATHB-6	Homeodomain;PF00046.32^HALZ;PF02183.21	2	2	3
OG01253	77	PMTD_ARATH;Probable pectin methyltransferase QUA3 {ECO:0000305}	Methyltransf_11;PF08241.15^Methyltransf_29;PF03141.19^Methyltransf_25;PF13649.9^Methyltransf_23;PF13489.9	2	3	3
OG01254	77	NA	NA	2	2	4
OG01255	77	PBL11_ARATH;Probable serine/threonine-protein kinase PBL11 {ECO:0000305}	PK_Tyr_Ser-Thr;PF07714.20^Pkinase;PF00069.28	2	2	3
OG01256	77	RL37A_BRARR;Large ribosomal subunit protein eL43 {ECO:0000305}	Ribosomal_L37ae;PF01780.22	1	2	4
OG01257	77	PIN5_ARATH;Auxin efflux carrier component 5 {ECO:0000303|PubMed:15817418}	Mem_trans;PF03547.21	3	3	7
OG01258	77	CASP3_SORBI;Casparian strip membrane protein 3	CASP_dom;PF04535.15	3	3	3
OG01259	77	TBL4_ARATH;Protein trichome birefringence-like 4	PC-Esterase;PF13839.9^PMR5N;PF14416.9	2	1	4
OG01260	77	NA	DUF547;PF04784.17^Lzipper-MIP1;PF14389.9	2	2	3
OG01261	77	FAD3E_BRANA;Acyl-lipid omega-3 desaturase (cytochrome b5) endoplasmic reticulum {ECO:0000303|PubMed:1455229}	FA_desaturase;PF00487.27^DUF3474;PF11960.11	2	2	4
OG01262	77	CYL2_ARATH;Cyclase-like protein 2 {ECO:0000305}	Root_cap;PF06830.14	3	3	6
OG01263	77	ERF37_ARATH;Ethylene-responsive transcription factor ERF037	AP2;PF00847.23	2	2	3
OG01264	77	ADH1_ZEALU;Alcohol dehydrogenase 1	ADH_zinc_N;PF00107.29^ADH_N;PF08240.15	4	5	8
OG01265	77	SAU40_ARATH;Auxin-responsive protein SAUR40 {ECO:0000305}	Auxin_inducible;PF02519.17	1	2	3
OG01266	77	CC50B_HUMAN;Cell cycle control protein 50B	CDC50;PF03381.18	3	4	6
OG01267	77	NA	PDDEXK_6;PF04720.15	4	3	10
OG01268	77	CIPKK_ARATH;CBL-interacting serine/threonine-protein kinase 20	ABC1;PF03109.19^Kinase-like;PF14531.9^PK_Tyr_Ser-Thr;PF07714.20^Pkinase;PF00069.28^NAF;PF03822.17	2	2	3
OG01269	77	TLP1_ARATH;Tubby-like F-box protein 1 {ECO:0000303|PubMed:15064372}	Tub;PF01167.21^F-box;PF00646.36^F-box-like;PF12937.10	2	3	3
OG01270	77	Y4598_ARATH;Uncharacterized protein At4g06598	NA	2	2	3
OG01271	77	RL10_EUPES;Large ribosomal subunit protein uL16 {ECO:0000305}	Ribosomal_L16;PF00252.21	2	2	4
OG01272	77	BGL16_ORYSJ;Beta-glucosidase 16 {ECO:0000303|PubMed:17196101}	Glyco_hydro_1;PF00232.21	7	11	12
OG01273	77	ACCO5_ARATH;1-aminocyclopropane-1-carboxylate oxidase 5	2OG-FeII_Oxy;PF03171.23^DIOX_N;PF14226.9	5	5	9
OG01274	77	PSBD_ANTMA;Photosystem II D2 protein {ECO:0000255|HAMAP-Rule:MF_01383}	PSII;PF00421.22^Photo_RC;PF00124.22	0	4	0
OG01275	77	RIPK_ARATH;Serine/threonine-protein kinase RIPK {ECO:0000305}	Pkinase;PF00069.28^PK_Tyr_Ser-Thr;PF07714.20	2	1	3
OG01277	77	PER39_ARATH;Peroxidase 39	peroxidase;PF00141.26	2	2	4
OG01278	77	NA	NA	0	1	3
OG01279	77	VA722_ARATH;Vesicle-associated membrane protein 722 {ECO:0000303|PubMed:11115874}	zf-RVT;PF13966.9	0	1	2
OG01286	76	MMK1_MEDSA;Mitogen-activated protein kinase homolog MMK1	Pkinase;PF00069.28^PK_Tyr_Ser-Thr;PF07714.20	2	2	4
OG01287	76	CNOT8_MOUSE;CCR4-NOT transcription complex subunit 8	CAF1;PF04857.23	2	2	6
OG01288	76	METE1_ORYSJ;5-methyltetrahydropteroyltriglutamate--homocysteine methyltransferase 1	Meth_synt_1;PF08267.15^Meth_synt_2;PF01717.21	1	1	1
OG01289	76	HMGB3_ARATH;High mobility group B protein 3	HMG_box;PF00505.22^HMG_box_2;PF09011.13	2	2	3
OG01290	76	AAPK1_HUMAN;5'-AMP-activated protein kinase catalytic subunit alpha-1	Pkinase;PF00069.28^PK_Tyr_Ser-Thr;PF07714.20^Kinase-like;PF14531.9^KA1;PF02149.22^AdenylateSensor;PF16579.8	2	2	3
OG01291	76	LBD38_ARATH;LOB domain-containing protein 38	LOB;PF03195.17	2	2	3
OG01292	76	RHD32_ARATH;Protein ROOT HAIR DEFECTIVE 3 homolog 2 {ECO:0000255|HAMAP-Rule:MF_03109}	Sey1_3HB;PF20428.1^RHD3_GTPase;PF05879.15	1	2	3
OG01293	76	NRP1_ORYSI;NAP1-related protein 1	NAP;PF00956.21	2	2	3
OG01294	76	C3H63_ARATH;Zinc finger CCCH domain-containing protein 63	WD40;PF00400.35^zf_CCCH_4;PF18345.4^NBCH_WD40;PF20426.1^Torus;PF16131.8^zf-CCCH_4;PF18044.4^Nup160;PF11715.11^zf-CCCH;PF00642.27	5	2	6
OG01295	76	RVE7L_ARATH;Protein REVEILLE 7-like	Myb_DNA-binding;PF00249.34	2	2	5
OG01296	76	CCD11_ORYSJ;Cyclin-D1-1	Cyclin_N;PF00134.26^Cyclin_C;PF02984.22	2	2	2
OG01297	76	Y5814_ORYSJ;B3 domain-containing protein Os05g0481400	B3;PF02362.24^DUF724;PF05266.17	2	3	4
OG01298	76	RAB5A_ORYSJ;Ras-related protein Rab5A {ECO:0000305}	Ras;PF00071.25^Roc;PF08477.16^Arf;PF00025.24	3	4	6
OG01299	76	U92A1_ARATH;UDP-glycosyltransferase 92A1	UDPGT;PF00201.21	2	4	5
OG01300	76	HFA6B_ARATH;Heat stress transcription factor A-6b	HSF_DNA-bind;PF00447.20	2	3	4
OG01301	76	6PGD1_SPIOL;6-phosphogluconate dehydrogenase decarboxylating 1	6PGD;PF00393.22^NAD_binding_2;PF03446.18	2	3	3
OG01302	76	NA	DUF1262;PF06880.14^Toxin_10;PF05431.14	4	4	5
OG01303	76	MPCP3_ARATH;Mitochondrial phosphate carrier protein 3 mitochondrial	Mito_carr;PF00153.30	3	2	5
OG01304	76	NA	TPR_17;PF13431.9^TPR_19;PF14559.9^TPR_1;PF00515.31	2	2	3
OG01305	76	NFYA9_ARATH;Nuclear transcription factor Y subunit A-9	CBFB_NFYA;PF02045.18	2	2	5
OG01306	76	AGAL2_ARATH;Alpha-galactosidase 2 {ECO:0000303|PubMed:15034167}	Melibiase_C;PF17801.4^Melibiase_2;PF16499.8^Melibiase_2_C;PF17450.5	2	4	4
OG01307	76	HQGT_RAUSE;Hydroquinone glucosyltransferase	UDPGT;PF00201.21	3	2	4
OG01308	76	DHE1_ARATH;Glutamate dehydrogenase 1	ELFV_dehydrog;PF00208.24^ELFV_dehydrog_N;PF02812.21	2	2	3
OG01309	76	MSL10_ARATH;Mechanosensitive ion channel protein 10	MS_channel;PF00924.21	2	2	2
OG01310	76	PMLN_PRUPE;Peamaclein {ECO:0000303|PubMed:23278887}	GASA;PF02704.17	3	4	5
OG01311	76	NA	SAGA-Tad1;PF12767.10	2	2	4
OG01312	76	Y7633_ORYSJ;B3 domain-containing protein Os07g0563300	B3;PF02362.24^zf-CW;PF07496.18	2	3	4
OG01313	76	COL9_ARATH;Zinc finger protein CONSTANS-LIKE 9	CCT;PF06203.17^zf-B_box;PF00643.27	1	1	2
OG01314	76	Y4423_ARATH;DUF21 domain-containing protein At4g14230	CBS;PF00571.31^CNNM;PF01595.23	2	2	4
OG01315	76	RPAB1_HUMAN;DNA-directed RNA polymerases I II and III subunit RPABC1	ROH1-like;PF05633.14	2	2	3
OG01316	76	POLX_TOBAC;Retrovirus-related Pol polyprotein from transposon TNT 1-94	Retrotran_gag_2;PF14223.9^gag_pre-integrs;PF13976.9^rve;PF00665.29^RVT_2;PF07727.17^zf-CCHC;PF00098.26	0	1	1
OG01317	76	TIA1_MOUSE;Cytotoxic granule associated RNA binding protein TIA1 {ECO:0000312|MGI:MGI:107914}	RRM_1;PF00076.25	2	2	2
OG01318	76	HMA5_ARATH;Probable copper-transporting ATPase HMA5	HMA;PF00403.29^Hydrolase;PF00702.29^E1-E2_ATPase;PF00122.23	3	3	6
OG01319	76	BURPH_ORYSJ;BURP domain-containing protein 17	BURP;PF03181.18^OB_NTP_bind;PF07717.19	4	11	12
OG01320	76	MIOX_ORYSJ;Probable inositol oxygenase	MIOX;PF05153.18	3	3	4
OG01321	76	POLX_TOBAC;Retrovirus-related Pol polyprotein from transposon TNT 1-94	Retrotran_gag_2;PF14223.9^gag_pre-integrs;PF13976.9^rve;PF00665.29	0	1	2
OG01323	75	NAC6_SOYBN;NAC domain-containing protein 6 {ECO:0000303|PubMed:16919368}	NAM;PF02365.18	2	2	3
OG01324	75	DCTP1_RAT;dCTP pyrophosphatase 1	MazG-like;PF12643.10^MazG;PF03819.20	2	3	5
OG01325	75	PUB24_ARATH;E3 ubiquitin-protein ligase PUB24	U-box;PF04564.18^zf-Nse;PF11789.11	1	2	2
OG01326	75	C94C1_ARATH;Cytochrome P450 94C1 {ECO:0000305}	p450;PF00067.25	2	2	4
OG01327	75	BH068_ARATH;Transcription factor bHLH68	NA	2	2	4
OG01328	75	NA	NA	0	29	36
OG01329	75	GT7_ARATH;Putative glycosyltransferase 7	Glyco_transf_34;PF05637.15	4	4	8
OG01330	75	RAD23_ORYSJ;Probable ubiquitin receptor RAD23	UBA;PF00627.34^XPC-binding;PF09280.14^ubiquitin;PF00240.26^Rad60-SLD;PF11976.11	2	2	4
OG01331	75	NA	DUF538;PF04398.15	2	2	4
OG01332	75	ALL9_OLEEU;Glucan endo-13-beta-D-glucosidase	Glyco_hydro_17;PF00332.21^X8;PF07983.16^Pentapeptide;PF00805.25^Pentapeptide_3;PF13576.9	3	4	6
OG01333	75	ISCU_HUMAN;Iron-sulfur cluster assembly enzyme ISCU {ECO:0000305}	NifU_N;PF01592.19	1	1	1
OG01334	75	ATL8_ARATH;RING-H2 finger protein ATL8	zf-RING_11;PF17123.8^zf-RING_2;PF13639.9^zf-C3HC4_2;PF13923.9^zf-rbx1;PF12678.10^zf-C3HC4;PF00097.28^zf-ANAPC11;PF12861.10	1	1	2
OG01335	75	PHSA_ARATH;Probable polyamine transporter At1g31820	AA_permease;PF00324.24^AA_permease_2;PF13520.9	1	1	2
OG01336	75	RANA1_TOBAC;GTP-binding nuclear protein Ran-A1	Ras;PF00071.25^Roc;PF08477.16^Arf;PF00025.24	2	3	6
OG01337	75	SYP21_ARATH;Syntaxin-21	Syntaxin_2;PF14523.9^SNARE;PF05739.22^Syntaxin;PF00804.28	3	5	5
OG01338	75	DHH1_MAGO7;ATP-dependent RNA helicase DHH1	Helicase_C;PF00271.34^DEAD;PF00270.32	2	2	4
OG01339	75	RL36_DAUCA;Large ribosomal subunit protein eL36 {ECO:0000305}	Ribosomal_L36e;PF01158.21	2	2	3
OG01340	75	U2A2A_ORYSJ;Splicing factor U2af large subunit A	RRM_1;PF00076.25	3	2	3
OG01341	75	AHL21_ARATH;AT-hook motif nuclear-localized protein 21 {ECO:0000312|EMBL:FAA00292.1}	PCC;PF03479.18	2	1	11
OG01342	75	MAN2_SOLLC;Mannan endo-14-beta-mannosidase 2	Cellulase;PF00150.21	6	3	7
OG01343	75	WTR45_ARATH;WAT1-related protein At5g64700	EamA;PF00892.23	5	4	7
OG01344	75	SKIP2_ARATH;F-box protein SKIP2	LRR_6;PF13516.9^LRR_4;PF12799.10^F-box-like;PF12937.10^F-box_5;PF18511.4	2	2	4
OG01345	75	TLP10_ARATH;Tubby-like F-box protein 10 {ECO:0000303|PubMed:15064372}	Tub;PF01167.21^F-box;PF00646.36^F-box-like;PF12937.10	2	2	2
OG01346	75	APF1_ARATH;Aspartyl protease family protein 1 {ECO:0000305}	Asp;PF00026.26^TAXi_N;PF14543.9^TAXi_C;PF14541.9	3	2	4
OG01347	75	E1314_ARATH;Glucan endo-13-beta-glucosidase 14	Glyco_hydro_17;PF00332.21^X8;PF07983.16	3	3	5
OG01348	75	GRXC9_ARATH;Glutaredoxin-C9	Glutaredoxin;PF00462.27	2	2	4
OG01349	75	RS3A_ORYSJ;Small ribosomal subunit protein eS1 {ECO:0000255|HAMAP-Rule:MF_03122}	Ribosomal_S3Ae;PF01015.21	2	2	3
OG01350	75	CRPK1_ARATH;Cold-responsive protein kinase 1 {ECO:0000303|PubMed:28344081}	PK_Tyr_Ser-Thr;PF07714.20^Pkinase;PF00069.28^ABC1;PF03109.19	2	2	4
OG01351	75	VQ4_ARATH;VQ motif-containing protein 4 {ECO:0000303|PubMed:22535423}	VQ;PF05678.17	2	2	4
OG01352	75	MNM1_ARATH;Protein METABOLIC NETWORK MODULATOR 1 {ECO:0000303|PubMed:25202318}	NA	1	1	3
OG01353	75	CASD1_DANRE;N-acetylneuraminate 9-O-acetyltransferase {ECO:0000250|UniProtKB:Q96PB1}	Cas1_AcylT;PF07779.15	2	2	4
OG01354	75	CATA1_GOSHI;Catalase isozyme 1	Catalase;PF00199.22^Catalase-rel;PF06628.15	4	3	4
OG01355	75	ODBA1_ARATH;2-oxoisovalerate dehydrogenase subunit alpha 1 mitochondrial	E1_dh;PF00676.23	3	2	4
OG01356	75	RL4A_ARATH;Large ribosomal subunit protein uL4z {ECO:0000303|PubMed:36423343}	Ribos_L4_asso_C;PF14374.9^Ribosomal_L4;PF00573.25	3	2	6
OG01357	75	CPR49_ARATH;GDSL esterase/lipase CPRD49	Lipase_GDSL_2;PF13472.9^Lipase_GDSL;PF00657.25	2	2	4
OG01358	75	ATL70_ARATH;RING-H2 finger protein ATL70	zf-RING_11;PF17123.8^zf-RING_2;PF13639.9^zf-rbx1;PF12678.10^zf-C3HC4_2;PF13923.9^zf-C3HC4;PF00097.28^zf-RING_UBOX;PF13445.9^zf-RING_5;PF14634.9	1	2	4
OG01359	75	CHD4_MOUSE;Chromodomain-helicase-DNA-binding protein 4	TDBD;PF16135.8^PHD;PF00628.32	2	3	3
OG01360	75	PME49_ARATH;Probable pectinesterase 49	Pectinesterase;PF01095.22^DUF5010_C;PF18099.4	3	3	6
OG01361	75	RS5_HUMAN;Small ribosomal subunit protein uS7 {ECO:0000303|PubMed:24524803}	Ribosomal_S7;PF00177.24	3	2	4
OG01362	75	BABL_LILLO;Chemocyanin	Cu_bind_like;PF02298.20	2	1	2
OG01364	75	NA	DDE_Tnp_4;PF13359.9^Plant_tran;PF04827.17	2	26	47
OG01367	74	MDLL_ARATH;(R)-mandelonitrile lyase-like	GMC_oxred_N;PF00732.22^GMC_oxred_C;PF05199.16	2	2	3
OG01368	74	ITPK1_SOYBN;Inositol-tetrakisphosphate 1-kinase 1 {ECO:0000303|PubMed:18474240}	Ins134_P3_kin;PF05770.14^Ins134_P3_kin_N;PF17927.4	2	3	4
OG01369	74	GH34_ORYSJ;Probable indole-3-acetic acid-amido synthetase GH3.4	GH3;PF03321.16	2	2	4
OG01370	74	MAF5_ARATH;Protein MADS AFFECTING FLOWERING 5	SRF-TF;PF00319.21^K-box;PF01486.20	1	1	2
OG01371	74	NA	MFS_1;PF07690.19^Sugar_tr;PF00083.27^OATP;PF03137.23	3	2	3
OG01372	74	RL35_HUMAN;Large ribosomal subunit protein uL29 {ECO:0000303|PubMed:24524803}	Ribosomal_L29;PF00831.26	3	2	3
OG01373	74	ARID3_ARATH;AT-rich interactive domain-containing protein 3	ARID;PF01388.24	2	2	3
OG01374	74	PIR_HUMAN;Pirin	Pirin_C;PF05726.16^Pirin;PF02678.19^Cupin_2;PF07883.14	2	3	2
OG01375	74	PUB70_ORYSJ;U-box domain-containing protein 70 {ECO:0000303|PubMed:19825583}	Pkinase;PF00069.28^PK_Tyr_Ser-Thr;PF07714.20^Usp;PF00582.29	2	2	1
OG01376	74	RBP1_MEDTR;RNA-binding protein 1 {ECO:0000303|PubMed:15037734}	RRM_1;PF00076.25	3	3	5
OG01377	74	CRK10_ARATH;Cysteine-rich receptor-like protein kinase 10	PK_Tyr_Ser-Thr;PF07714.20^DUF3403;PF11883.11^Pkinase;PF00069.28	2	2	0
OG01378	74	NFYBA_ORYSJ;Nuclear transcription factor Y subunit B-10 {ECO:0000305}	CBFD_NFYB_HMF;PF00808.26	2	4	4
OG01379	74	NA	NPR1_interact;PF15699.8	2	1	2
OG01380	74	JOX1_ARATH;Jasmonate-induced oxygenase 1 {ECO:0000303|PubMed:28559313}	2OG-FeII_Oxy;PF03171.23^DIOX_N;PF14226.9	2	2	4
OG01381	74	HIBC2_ARATH;Probable 3-hydroxyisobutyryl-CoA hydrolase 2	ECH_2;PF16113.8^ECH_1;PF00378.23	3	3	4
OG01382	74	HEC2_ARATH;Transcription factor HEC2	HLH;PF00010.29	1	2	4
OG01383	74	Y3264_ARATH;Putative UPF0481 protein At3g02645	DUF247;PF03140.18	6	12	19
OG01385	74	TIF5A_ARATH;Protein TIFY 5A {ECO:0000303|PubMed:17499004}	tify;PF06200.17^Jas_motif;PF09425.13	2	2	4
OG01386	74	FQRL1_ARATH;Probable NAD(P)H dehydrogenase (quinone) FQR1-like 1 {ECO:0000305}	FMN_red;PF03358.18^Flavodoxin_2;PF02525.20	3	3	4
OG01387	74	AML3_ARATH;Protein MEI2-like 3	RRM_1;PF00076.25^RRM_5;PF13893.9^RRM_2;PF04059.15^RRM_occluded;PF16842.8	2	2	4
OG01388	74	BH113_ARATH;Transcription factor bHLH113	NA	2	2	5
OG01389	74	PME51_ARATH;Probable pectinesterase/pectinesterase inhibitor 51	Pectinesterase;PF01095.22^PMEI;PF04043.18	2	2	4
OG01390	74	PES1_ARATH;Phytyl ester synthase 1 chloroplastic {ECO:0000303|PubMed:22623494}	Hydrolase_4;PF12146.11^Abhydrolase_1;PF00561.23^Abhydrolase_6;PF12697.10^DAGAT;PF03982.16	5	5	7
OG01391	74	NA	DUF868;PF05910.15	2	2	3
OG01392	74	TBL30_ARATH;Protein trichome birefringence-like 30	PC-Esterase;PF13839.9^PMR5N;PF14416.9	1	1	2
OG01393	74	MP701_ORYSJ;Microtubule-associated protein 70-1	MAP70;PF07058.14	2	3	4
OG01394	74	GAI_GOSHI;DELLA protein GAI	GRAS;PF03514.17^DELLA;PF12041.11	2	2	4
OG01395	74	P2C55_ARATH;Probable protein phosphatase 2C 55	SpoIIE;PF07228.15^PP2C;PF00481.24^PP2C_2;PF13672.9	2	3	6
OG01396	74	TRPB_PROM1;Tryptophan synthase beta chain {ECO:0000255|HAMAP-Rule:MF_00133}	Transposase_24;PF03004.17	0	5	2
OG01397	74	LAT52_SOLLC;Anther-specific protein LAT52	Pollen_Ole_e_1;PF01190.20	3	3	6
OG01398	74	NA	MULE;PF10551.12^SWIM;PF04434.20^DBD_Tnp_Mut;PF03108.18	1	27	37
OG01402	73	KNOS2_ORYSJ;Homeobox protein knotted-1-like 2	Homeobox_KN;PF05920.14^KNOX2;PF03791.16^KNOX1;PF03790.16^ELK;PF03789.16	2	2	3
OG01403	73	OPT8_ARATH;Oligopeptide transporter 8	OPT;PF03169.18	2	2	3
OG01404	73	PERK2_ARATH;Proline-rich receptor-like protein kinase PERK2	Pkinase;PF00069.28^PK_Tyr_Ser-Thr;PF07714.20^Usp;PF00582.29^BT1;PF03092.19	3	2	4
OG01405	73	OLE12_CORAV;Oleosin Cor a 12 {ECO:0000303|PubMed:34146442}	Oleosin;PF01277.20	2	2	4
OG01406	73	XLG1_ARATH;Extra-large guanine nucleotide-binding protein 1	G-alpha;PF00503.23	3	2	3
OG01407	73	SNP30_ARATH;Putative SNAP25 homologous protein SNAP30	V-SNARE_C;PF12352.11	2	2	6
OG01408	73	SGO2_ARATH;SHUGOSHIN 2 {ECO:0000303|PubMed:23884434}	Shugoshin_C;PF07557.14	3	2	5
OG01409	73	AB6G_ARATH;ABC transporter G family member 6	ABC2_membrane;PF01061.27^ABC_tran;PF00005.30^ABC2_membrane_7;PF19055.3	1	2	3
OG01410	73	TRNK1_HUMAN;TPR and ankyrin repeat-containing protein 1	AAA_30;PF13604.9^UvrD-helicase;PF00580.24^AAA_19;PF13245.9^AAA_12;PF13087.9^AAA_11;PF13086.9^UvrD_C;PF13361.9^AAA_22;PF13401.9^DUF6469;PF20073.2^Viral_helicase1;PF01443.21^UvrD_C_2;PF13538.9	4	4	5
OG01411	73	NA	NA	2	2	4
OG01412	73	IDHC_PONAB;Isocitrate dehydrogenase [NADP] cytoplasmic	Iso_dh;PF00180.23	2	2	4
OG01413	73	MD33B_ARATH;Mediator of RNA polymerase II transcription subunit 33B	NA	2	2	4
OG01414	73	RS24_ORYLA;Small ribosomal subunit protein eS24 {ECO:0000305}	Ribosomal_S24e;PF01282.22	3	3	5
OG01415	73	SYM_THEON;Methionine--tRNA ligase {ECO:0000255|HAMAP-Rule:MF_00098}	Apolipoprotein;PF01442.21	3	2	4
OG01416	73	SPXM1_ARATH;SPX domain-containing membrane protein At1g63010	SPX;PF03105.22^MFS_1;PF07690.19^Sugar_tr;PF00083.27	2	2	4
OG01418	73	FBL45_ARATH;Putative F-box/LRR-repeat protein At3g18150	NA	1	6	8
OG01419	73	UFOG_SOLME;Anthocyanidin 3-O-glucosyltransferase	UDPGT;PF00201.21	3	6	8
OG01420	73	CB60B_ARATH;Calmodulin-binding protein 60 B {ECO:0000303|PubMed:11782485}	Calmodulin_bind;PF07887.14^Calmod_bind_M;PF20451.1^Calmod_bind_C;PF20452.1	2	2	3
OG01421	73	NA	Transcrip_act;PF04949.16	2	2	3
OG01422	73	RS4X_MACFU;Small ribosomal subunit protein eS4 X isoform {ECO:0000305}	40S_S4_C;PF16121.8^Ribosomal_S4e;PF00900.23^RS4NT;PF08071.15^KOW;PF00467.32^S4;PF01479.28	1	1	3
OG01423	73	GDL62_ARATH;GDSL esterase/lipase At4g10955	Lipase_3;PF01764.28	2	3	5
OG01424	73	XERIC_ARATH;Probable E3 ubiquitin-protein ligase XERICO	zf-RING_2;PF13639.9^zf-RING_11;PF17123.8^zf-C3HC4;PF00097.28^zf-C3HC4_2;PF13923.9^zf-rbx1;PF12678.10	1	0	0
OG01425	73	R27A3_ARATH;Large ribosomal subunit protein uL15x {ECO:0000303|PubMed:36423343}	Ribosomal_L27A;PF00828.22	3	2	3
OG01426	73	PKS1_ARATH;Protein PHYTOCHROME KINASE SUBSTRATE 1	NA	1	2	4
OG01427	73	SLK2_ARATH;Probable transcriptional regulator SLK2	LIM_bind;PF01803.19	2	2	5
OG01428	73	CRL5_ORYSJ;AP2-like ethylene-responsive transcription factor CRL5 {ECO:0000305}	AP2;PF00847.23	4	2	3
OG01429	73	SIS8_ARATH;Probable serine/threonine-protein kinase SIS8 {ECO:0000305}	PK_Tyr_Ser-Thr;PF07714.20^Pkinase;PF00069.28^EDR1;PF14381.9	2	2	4
OG01430	73	TPT_FLATR;Triose phosphate/phosphate translocator chloroplastic	EamA;PF00892.23^TPT;PF03151.19	2	3	3
OG01431	73	NA	NA	2	2	3
OG01432	73	WSD4_ARATH;Wax ester synthase/diacylglycerol acyltransferase 4 {ECO:0000303|PubMed:18621978}	WS_DGAT_C;PF06974.16^WES_acyltransf;PF03007.19	3	4	5
OG01433	73	CBSX5_ARATH;CBS domain-containing protein CBSX5	CBS;PF00571.31	2	2	3
OG01434	73	FAAH_MEDTR;Fatty acid amide hydrolase {ECO:0000303|PubMed:16624618}	Amidase;PF01425.24	2	2	4
OG01435	73	RS15_PICMA;Small ribosomal subunit protein uS19 {ECO:0000305}	Ribosomal_S19;PF00203.24	2	2	1
OG01436	73	GPAT6_ARATH;Glycerol-3-phosphate 2-O-acyltransferase 6	HAD;PF12710.10^Acyltransferase;PF01553.24	2	3	3
OG01437	73	PLDB1_ARATH;Phospholipase D beta 1 {ECO:0000303|PubMed:11891260}	PLDc_2;PF13091.9^PLDc;PF00614.25^C2;PF00168.33^PLD_C;PF12357.11	2	2	4
OG01438	73	BLH1_ARATH;BEL1-like homeodomain protein 1	POX;PF07526.14^Homeobox_KN;PF05920.14^Homeodomain;PF00046.32	2	2	3
OG01439	73	AGM11_ARATH;Arabinogalactan O-methyltransferase 1 {ECO:0000303|PubMed:31245760}	Polysacc_synt_4;PF04669.16	3	3	5
OG01440	73	PTR19_ARATH;Protein NRT1/ PTR FAMILY 4.6	PTR2;PF00854.24	2	2	3
OG01441	73	NES2_FRAAN;(3S6E)-nerolidol synthase 2 chloroplastic/mitochondrial	Terpene_synth_C;PF03936.19^Terpene_syn_C_2;PF19086.3^Terpene_synth;PF01397.24	1	1	2
OG01442	73	SPZ4_HORVU;Serpin-Z4	Serpin;PF00079.23	1	2	3
OG01443	73	Y5838_ARATH;Probably inactive leucine-rich repeat receptor-like protein kinase At5g48380	PK_Tyr_Ser-Thr;PF07714.20^Pkinase;PF00069.28^LRR_4;PF12799.10^LRR_8;PF13855.9^LRRNT_2;PF08263.15	3	7	13
OG01444	73	M3K20_ARATH;Mitogen-activated protein kinase kinase kinase 20 {ECO:0000303|PubMed:21969089}	Pkinase;PF00069.28^PK_Tyr_Ser-Thr;PF07714.20	1	1	2
OG01449	72	RAA2B_ARATH;Ras-related protein RABA2b	Ras;PF00071.25^Roc;PF08477.16^Arf;PF00025.24	2	2	3
OG01450	72	FER1_RAPSA;Ferredoxin root R-B1	Fer2;PF00111.30	2	2	3
OG01451	72	RS3_RAT;Small ribosomal subunit protein uS3 {ECO:0000305}	NA	2	2	4
OG01452	72	TOE3_ARATH;AP2-like ethylene-responsive transcription factor TOE3	AP2;PF00847.23	1	1	2
OG01453	72	CHT5B_MEDTR;Class V chitinase CHIT5b {ECO:0000305}	Glyco_hydro_18;PF00704.31	2	5	9
OG01454	72	SD18_ARATH;Receptor-like serine/threonine-protein kinase SD1-8	S_locus_glycop;PF00954.23^B_lectin;PF01453.27^PAN_2;PF08276.14^PK_Tyr_Ser-Thr;PF07714.20^Pkinase;PF00069.28	1	0	2
OG01455	72	RING3_ARATH;E3 ubiquitin-protein ligase At3g02290	zf-rbx1;PF12678.10^zf-RING_2;PF13639.9^zf-C3HC4_2;PF13923.9^zf-ANAPC11;PF12861.10^zf-RING_5;PF14634.9^zf-RING_UBOX;PF13445.9	2	2	3
OG01456	72	BCP_PETHY;Blue copper protein {ECO:0000303|PubMed:25971550}	Cu_bind_like;PF02298.20	1	2	4
OG01457	72	OLEL_SESIN;Oleosin L {ECO:0000303|PubMed:12450125}	Oleosin;PF01277.20	2	1	4
OG01458	72	C96AF_ARATH;Alkane hydroxylase MAH1 {ECO:0000303|PubMed:17905869}	p450;PF00067.25	3	3	3
OG01459	72	PZ02_LUPPO;Protein PPLZ02	AP2;PF00847.23	2	3	4
OG01460	72	GASA2_ARATH;Gibberellin-regulated protein 2	Arm;PF00514.26^HEAT_2;PF13646.9^Adaptin_N;PF01602.23^HEAT_EZ;PF13513.9	2	2	2
OG01461	72	ACA3_ORYSJ;Calcium-transporting ATPase 3 plasma membrane-type {ECO:0000305}	Hydrolase;PF00702.29^Cation_ATPase_C;PF00689.24^E1-E2_ATPase;PF00122.23^Cation_ATPase_N;PF00690.29^Cation_ATPase;PF13246.9^CaATP_NAI;PF12515.11	2	2	4
OG01462	72	KRP5_ORYSJ;Cyclin-dependent kinase inhibitor 5	CDI;PF02234.22	2	2	2
OG01463	72	ALPL_ARATH;Protein ALP1-like {ECO:0000305}	DDE_Tnp_4;PF13359.9^Plant_tran;PF04827.17	4	4	5
OG01464	72	NA	TDBD;PF16135.8	2	2	4
OG01465	72	SED5_YEAST;Integral membrane protein SED5	NA	2	2	4
OG01466	72	REL2_ORYSJ;Protein ROLLING AND ERECT LEAF 2 {ECO:0000303|PubMed:27473144}	DUF632;PF04782.15^DUF630;PF04783.15	2	2	4
OG01467	72	YSL5_ARATH;Probable metal-nicotianamine transporter YSL5	OPT;PF03169.18	3	3	3
OG01468	72	SOT6_ARATH;Cytosolic sulfotransferase 6	Sulfotransfer_3;PF13469.9^Sulfotransfer_1;PF00685.30	3	4	6
OG01469	72	SCRK_ECOLX;Fructokinase	PfkB;PF00294.27	3	3	8
OG01470	72	PXC2_ARATH;Leucine-rich repeat receptor-like protein kinase PXC2 {ECO:0000305}	LRR_8;PF13855.9^LRR_4;PF12799.10^LRR_1;PF00560.36^LRR_6;PF13516.9^Pkinase;PF00069.28^PK_Tyr_Ser-Thr;PF07714.20^LRRNT_2;PF08263.15	1	1	2
OG01471	72	WTR8_ARATH;WAT1-related protein At1g44800	EamA;PF00892.23	1	2	6
OG01472	72	STY17_ARATH;Serine/threonine-protein kinase STY17 {ECO:0000305}	Pkinase;PF00069.28^PK_Tyr_Ser-Thr;PF07714.20^Pkinase_fungal;PF17667.4	2	2	2
OG01473	72	PLDA2_ORYSJ;Phospholipase D alpha 2	PLDc_2;PF13091.9^PLDc;PF00614.25^PLD_C;PF12357.11^C2;PF00168.33	2	2	1
OG01474	72	Y1015_ARATH;Uncharacterized protein At1g01500	NA	2	2	4
OG01475	72	KN7J_ORYSJ;Kinesin-like protein KIN-7J {ECO:0000305}	DUF3490;PF11995.11^Kinesin;PF00225.26^Microtub_bd;PF16796.8	2	1	2
OG01476	72	AAE1_ARATH;Butanoate--CoA ligase AAE1 {ECO:0000305|PubMed:23300257}	NA	2	2	5
OG01477	72	URGT2_ARATH;UDP-rhamnose/UDP-galactose transporter 2 {ECO:0000312|EMBL:AKA88220.1}	TPT;PF03151.19	3	2	5
OG01478	72	EHD2_ARATH;EH domain-containing protein 2 {ECO:0000303|PubMed:18547399}	Dynamin_N;PF00350.26^EHD_N;PF16880.8^DUF5600;PF18150.4^MMR_HSR1;PF01926.26^EF-hand_4;PF12763.10^EF-hand_7;PF13499.9^EF-hand_1;PF00036.35	3	2	3
OG01479	72	SBT18_ARATH;Subtilisin-like protease SBT1.8 {ECO:0000303|PubMed:16193095}	Peptidase_S8;PF00082.25^Inhibitor_I9;PF05922.19^fn3_6;PF17766.4^PA;PF02225.25	2	2	2
OG01480	72	GDL66_ARATH;GDSL esterase/lipase At4g26790	Lipase_GDSL;PF00657.25	2	2	4
OG01481	72	CAMT_MEDSA;Caffeoyl-CoA O-methyltransferase	Methyltransf_3;PF01596.20^Methyltransf_24;PF13578.9	2	1	2
OG01482	72	PME55_ARATH;Probable pectinesterase 55	Pectinesterase;PF01095.22	1	1	2
OG01483	72	CDC2C_ARATH;Cyclin-dependent kinase C-2 C {ECO:0000303|PubMed:10366720}	Pkinase;PF00069.28^PK_Tyr_Ser-Thr;PF07714.20	2	2	3
OG01485	72	RNFT1_DANRE;E3 ubiquitin-protein ligase RNFT1 {ECO:0000305}	zf-C3HC4_3;PF13920.9^zf-RING_2;PF13639.9^zf-RING_UBOX;PF13445.9^zf-C3HC4;PF00097.28^zf-C3HC4_2;PF13923.9^zf-RING_5;PF14634.9^zf-rbx1;PF12678.10^Prok-RING_4;PF14447.9	2	3	2
OG01486	72	SYT1_ARATH;Synaptotagmin-1	C2;PF00168.33^SMP_LBD;PF17047.8	2	2	3
OG01487	72	NAR21_ORYSJ;High-affinity nitrate transporter-activating protein 2.1	NAR2;PF16974.8^Kre9_KNH;PF10342.12	2	2	4
OG01488	72	RRT1_ARATH;Rhamnogalacturonan I rhamnosyltransferase 1 {ECO:0000303|PubMed:30082766}	O-FucT;PF10250.12	1	1	2
OG01489	72	ABIL3_ARATH;Protein ABIL3	NA	2	2	3
OG01490	72	ADO1_ARATH;Adagio protein 1	Kelch_4;PF13418.9^Kelch_6;PF13964.9^Kelch_2;PF07646.18^Kelch_5;PF13854.9^Kelch_1;PF01344.28^Kelch_3;PF13415.9^PAS_9;PF13426.10^PAS;PF00989.28^F-box-like;PF12937.10^PAS_3;PF08447.15	2	2	4
OG01491	72	JOX4_ARATH;Jasmonate-induced oxygenase 4 {ECO:0000303|PubMed:28559313}	2OG-FeII_Oxy;PF03171.23^DIOX_N;PF14226.9	2	2	4
OG01492	72	TMN1_ARATH;Transmembrane 9 superfamily member 1 {ECO:0000305}	EMP70;PF02990.19	1	1	1
OG01493	72	RD23C_ARATH;Ubiquitin receptor RAD23c	NA	2	1	2
OG01494	72	UFD1_DICDI;Ubiquitin fusion degradation protein 1 homolog	UFD1;PF03152.17	4	3	7
OG01496	72	R1C3_SOLDE;Putative late blight resistance protein homolog R1C-3	NB-LRR;PF12061.11^NB-ARC;PF00931.25	10	33	27
OG01499	71	NA	NA	2	2	2
OG01500	71	NA	NA	2	2	3
OG01501	71	FAB1B_ARATH;1-phosphatidylinositol-3-phosphate 5-kinase FAB1B	PIP5K;PF01504.21^Cpn60_TCP1;PF00118.27^FYVE;PF01363.24	2	2	2
OG01502	71	NDL1_ARATH;Protein NDL1 {ECO:0000305}	Ndr;PF03096.17^Abhydrolase_1;PF00561.23	2	2	3
OG01503	71	Y5262_ARATH;Ankyrin repeat-containing protein At5g02620	Ank_3;PF13606.9^Ank_5;PF13857.9^Ank;PF00023.33^Ank_4;PF13637.9^Ank_2;PF12796.10^PGG;PF13962.9	1	1	1
OG01504	71	PGAP3_XENTR;Post-GPI attachment to proteins factor 3	Retrotrans_gag;PF03732.20	0	2	3
OG01505	71	SKU5_ARATH;Monocopper oxidase-like protein SKU5	Cu-oxidase_3;PF07732.18^Cu-oxidase;PF00394.25^Cu-oxidase_2;PF07731.17	2	2	2
OG01506	71	BIG1A_ARATH;Protein BIG GRAIN 1-like A {ECO:0000305}	NA	2	2	4
OG01507	71	PERK1_ARATH;Proline-rich receptor-like protein kinase PERK1	PK_Tyr_Ser-Thr;PF07714.20^Pkinase;PF00069.28	2	2	4
OG01508	71	GLYT5_ARATH;Probable glycosyltransferase At5g20260	Exostosin;PF03016.18	3	3	3
OG01509	71	ZDH18_RAT;Palmitoyltransferase ZDHHC18 {ECO:0000305}	DHHC;PF01529.23^dsrm;PF00035.29	2	3	2
OG01510	71	SKI14_ARATH;F-box protein SKIP14	F-box-like;PF12937.10	2	2	1
OG01511	71	SEC23_USTMA;Protein transport protein SEC23	Sec23_trunk;PF04811.18^zf-Sec23_Sec24;PF04810.18^Sec23_helical;PF04815.18^Sec23_BS;PF08033.15^Gelsolin;PF00626.25	2	3	4
OG01512	71	MSR1_ARATH;Protein MANNAN SYNTHESIS-RELATED 1 {ECO:0000303|PubMed:22966747}	O-FucT;PF10250.12	2	3	4
OG01513	71	TIF6A_ARATH;Protein TIFY 6A	tify;PF06200.17^Jas_motif;PF09425.13	2	2	4
OG01514	71	NA	DUF1639;PF07797.17	1	2	3
OG01515	71	MLO10_ARATH;MLO-like protein 10	Mlo;PF03094.18	2	2	4
OG01516	71	AB15G_ARATH;ABC transporter G family member 15	ABC2_membrane_7;PF19055.3^AAA_21;PF13304.9^ABC_tran;PF00005.30^ABC2_membrane;PF01061.27	2	2	3
OG01517	71	SYT5_ARATH;Synaptotagmin-5	C2;PF00168.33^SMP_LBD;PF17047.8	2	2	4
OG01518	71	BI1_ARATH;Bax inhibitor 1	Bax1-I;PF01027.23	1	1	1
OG01519	71	P2C28_ORYSJ;Probable protein phosphatase 2C 28	PP2C;PF00481.24	2	2	3
OG01520	71	PDP2_ARATH;PWWP domain-containing protein 2 {ECO:0000303|PubMed:29314758}	PWWP;PF00855.20	2	3	3
OG01521	71	PUB9_ARATH;U-box domain-containing protein 9	Arm;PF00514.26^U-box;PF04564.18	2	2	4
OG01522	71	CLCA_ARATH;Chloride channel protein CLC-a	Voltage_CLC;PF00654.23^CBS;PF00571.31	2	2	3
OG01523	71	RL17_RAT;Large ribosomal subunit protein uL22 {ECO:0000305}	Ribosomal_L22;PF00237.22	4	8	4
OG01524	71	ORR5_ORYSJ;Two-component response regulator ORR5 {ECO:0000305}	Response_reg;PF00072.27	1	1	1
OG01525	71	ATL41_ORYSJ;E3 ubiquitin-protein ligase Os04g0590900	zf-RING_2;PF13639.9^zf-RING_11;PF17123.8^zf-rbx1;PF12678.10^zf-C3HC4_2;PF13923.9^zf-C3HC4;PF00097.28	2	1	5
OG01526	71	ENOXE_FRAAN;2-methylene-furan-3-one reductase	ADH_zinc_N_2;PF13602.9^ADH_N;PF08240.15^ADH_zinc_N;PF00107.29	5	8	10
OG01527	71	RLA0_OXYRB;Large ribosomal subunit protein uL10 {ECO:0000305}	Ribosomal_L10;PF00466.23^RL10P_insert;PF17777.4^Ribosomal_60s;PF00428.22	3	2	3
OG01528	71	TDL1_ARATH;TPD1 protein homolog 1 {ECO:0000305}	NA	3	0	2
OG01529	71	ZAT2_ARATH;Zinc finger protein ZAT2 {ECO:0000305}	zf-C2H2_6;PF13912.9^zf-C2H2_4;PF13894.9^zf-C2H2_jaz;PF12171.11^zf-met;PF12874.10^zf-C2H2;PF00096.29^zf-C2H2_2;PF12756.10	2	2	3
OG01530	71	CLV1A_SOYBN;Leucine-rich repeat receptor-like kinase protein CLV1a {ECO:0000305}	LRR_8;PF13855.9^LRR_4;PF12799.10^LRR_1;PF00560.36^Pkinase;PF00069.28^PK_Tyr_Ser-Thr;PF07714.20^LRRNT_2;PF08263.15^LRR_6;PF13516.9	2	2	3
OG01531	71	UBC39_ARATH;Putative ubiquitin-conjugating enzyme E2 39	UQ_con;PF00179.29	2	2	3
OG01532	71	PUP10_ARATH;Probable purine permease 10	PUNUT;PF16913.8^EamA;PF00892.23	3	5	8
OG01533	71	LEA34_GOSHI;Late embryogenesis abundant protein D-34	SMP;PF04927.15	1	1	2
OG01534	71	RNZ_YEAST;Ribonuclease Z	DUF4220;PF13968.9^DUF594;PF04578.16	8	5	11
OG01535	71	NUD11_ARATH;Nudix hydrolase 11	NUDIX;PF00293.31	2	2	3
OG01536	71	AED1_ARATH;Aspartyl protease AED1 {ECO:0000303|PubMed:24755512}	Asp;PF00026.26^TAXi_N;PF14543.9^TAXi_C;PF14541.9	3	2	3
OG01537	71	AAIP_WHEAT;Abscisic acid-inducible protein kinase	PK_Tyr_Ser-Thr;PF07714.20^Pkinase;PF00069.28	3	2	2
OG01538	71	C93B1_GLYEC;Licodione synthase {ECO:0000303|PubMed:9708921}	p450;PF00067.25	3	6	6
OG01539	71	TIP22_ARATH;Probable aquaporin TIP2-2	MIP;PF00230.23	2	2	2
OG01540	71	CID11_ARATH;Polyadenylate-binding protein-interacting protein 11	RRM_1;PF00076.25	1	1	1
OG01541	71	DET2_GOSHI;Steroid 5-alpha-reductase DET2 {ECO:0000303|PubMed:17565582}	Steroid_dh;PF02544.19	3	4	4
OG01542	71	P2B15_ARATH;F-box protein PP2-B15	PP2;PF14299.9	2	2	4
OG01543	71	ADPG2_ARATH;Polygalacturonase ADPG2	Glyco_hydro_28;PF00295.20^Pectate_lyase_3;PF12708.10	3	3	5
OG01544	71	TMVRN_NICGU;TMV resistance protein N	LRR_4;PF12799.10^LRR_8;PF13855.9^NB-ARC;PF00931.25^C-JID;PF20160.2^TIR;PF01582.23^TIR_2;PF13676.9^AAA_16;PF13191.9^NACHT;PF05729.15	13	1	10
OG01545	71	NA	NA	2	2	6
OG01549	70	CYB5S_TOBAC;Cytochrome b5 seed isoform	Cyt-b5;PF00173.31	2	2	3
OG01550	70	TRAH_PENCR;2-oxoglutarate-dependent dioxygenase traH {ECO:0000303|PubMed:30811183}	DIOX_N;PF14226.9^2OG-FeII_Oxy;PF03171.23	2	10	9
OG01551	70	UBC9_YEAST;SUMO-conjugating enzyme UBC9	UQ_con;PF00179.29	2	2	4
OG01552	70	SPG1_SCHPO;Septum-promoting GTP-binding protein 1	Ras;PF00071.25^Roc;PF08477.16	2	2	4
OG01553	70	KAPS_CATRO;Adenylyl-sulfate kinase chloroplastic	APS_kinase;PF01583.23	2	2	3
OG01554	70	PSBA_ATRBE;Photosystem II protein D1 {ECO:0000255|HAMAP-Rule:MF_01379}	Photo_RC;PF00124.22^ATP-synt_ab;PF00006.28	1	0	0
OG01555	70	TRL11_ARATH;Thioredoxin-like 1-1 chloroplastic	Thioredoxin;PF00085.23	2	3	4
OG01556	70	P2C77_ARATH;Protein phosphatase 2C 77 {ECO:0000303|PubMed:19021904}	PP2C;PF00481.24	2	2	4
OG01557	70	BTF3L_ARATH;Nascent polypeptide-associated complex subunit beta {ECO:0000255|RuleBase:RU361272}	NAC;PF01849.21	3	1	2
OG01558	70	P2C59_ARATH;Probable protein phosphatase 2C 59	PP2C;PF00481.24	2	2	3
OG01559	70	TTM1_ARATH;Inorganic pyrophosphatase TTM1 {ECO:0000305}	PRK;PF00485.21^CYTH;PF01928.24	3	2	3
OG01560	70	HIPL2_ARATH;HIPL2 protein	GSDH;PF07995.14	2	2	3
OG01561	70	BH071_ARATH;Transcription factor bHLH71	HLH;PF00010.29	3	3	6
OG01562	70	Y4967_ARATH;Uncharacterized oxidoreductase At4g09670	GFO_IDH_MocA;PF01408.25	3	3	6
OG01563	70	YUC10_ARATH;Probable indole-3-pyruvate monooxygenase YUCCA10	Lys_Orn_oxgnase;PF13434.9^Pyr_redox_3;PF13738.9^Pyr_redox_2;PF07992.17^FAD_binding_3;PF01494.22^FMO-like;PF00743.22^Pyr_redox;PF00070.30^Thi4;PF01946.20	3	3	6
OG01564	70	LPAT2_BRANA;1-acyl-sn-glycerol-3-phosphate acyltransferase 2	Acyltransf_C;PF16076.8^Acyltransferase;PF01553.24	2	2	4
OG01565	70	PEK14_ARATH;Proline-rich receptor-like protein kinase PERK14	PK_Tyr_Ser-Thr;PF07714.20^Pkinase;PF00069.28	2	2	1
OG01566	70	AP2L1_ARATH;AP2-like ethylene-responsive transcription factor At1g16060	AP2;PF00847.23	3	2	7
OG01567	70	RING3_ARATH;E3 ubiquitin-protein ligase At3g02290	zf-C3HC4_2;PF13923.9^zf-rbx1;PF12678.10^zf-RING_2;PF13639.9^zf-ANAPC11;PF12861.10^zf-C3HC4;PF00097.28^zf-RING_UBOX;PF13445.9^zf-RING_5;PF14634.9	2	2	3
OG01568	70	NU98B_ARATH;Nuclear pore complex protein NUP98B {ECO:0000303|PubMed:21189294}	Nucleoporin2;PF04096.17^Mucin-like;PF16058.8	2	3	4
OG01569	70	FBK67_ARATH;F-box/kelch-repeat protein At3g23880	F-box;PF00646.36^FBA_3;PF08268.15^F-box-like;PF12937.10^FBA_1;PF07734.16	0	1	2
OG01570	70	IMK3_ARATH;Probable leucine-rich repeat receptor-like protein kinase IMK3	LRR_4;PF12799.10^LRR_8;PF13855.9^LRR_1;PF00560.36^Pkinase;PF00069.28^PK_Tyr_Ser-Thr;PF07714.20^LRR_6;PF13516.9^LRRNT_2;PF08263.15	3	2	5
OG01571	70	COL6_ARATH;Zinc finger protein CONSTANS-LIKE 6	CCT;PF06203.17^zf-B_box;PF00643.27	2	3	3
OG01572	70	ELMOA_DICDI;ELMO domain-containing protein A	ELMO_CED12;PF04727.16	2	2	5
OG01573	70	B3GTI_ARATH;Hydroxyproline O-galactosyltransferase GALT5 {ECO:0000303|PubMed:25974423}	Galactosyl_T;PF01762.24^Gal-bind_lectin;PF00337.25	2	2	3
OG01574	70	PTR17_ARATH;Protein NRT1/ PTR FAMILY 8.5	PTR2;PF00854.24^MFS_1;PF07690.19	4	6	10
OG01575	70	AO1_ARATH;Primary amine oxidase 1 {ECO:0000303|PubMed:9681017}	Cu_amine_oxid;PF01179.23^Cu_amine_oxidN3;PF02728.19^Cu_amine_oxidN2;PF02727.19	3	3	6
OG01576	70	FPP2_ARATH;Filament-like plant protein 2 {ECO:0000303|PubMed:11972898}	FPP;PF05911.14^Crescentin;PF19220.3	2	2	3
OG01577	70	RL32_DROMI;Large ribosomal subunit protein eL32 {ECO:0000305}	Ribosomal_L32e;PF01655.21	3	2	5
OG01578	70	GLO1_ARATH;Glycolate oxidase 1	FMN_dh;PF01070.21^NMO;PF03060.18^IMPDH;PF00478.28	1	4	3
OG01579	70	B3GT4_ARATH;Probable beta-13-galactosyltransferase 4	DUF4094;PF13334.9^Galactosyl_T;PF01762.24	2	2	4
OG01580	70	NLTP2_ORYSI;Non-specific lipid-transfer protein 2	LTP_2;PF14368.9^Tryp_alpha_amyl;PF00234.25	1	3	7
OG01581	70	NA	NA	3	3	6
OG01582	70	PLCD4_ARATH;Phosphoinositide phospholipase C 4	PI-PLC-Y;PF00387.22^PI-PLC-X;PF00388.22^C2;PF00168.33^EF-hand_like;PF09279.14	2	3	3
OG01583	70	ERDL8_ARATH;Sugar transporter ERD6-like 8	MFS_1;PF07690.19^Sugar_tr;PF00083.27	2	2	4
OG01584	70	PGLR2_CRYJA;Polygalacturonase	Pectate_lyase_3;PF12708.10^Glyco_hydro_28;PF00295.20^Beta_helix;PF13229.9	2	2	3
OG01585	70	AHP2_ARATH;Histidine-containing phosphotransfer protein 2	Hpt;PF01627.26	3	3	6
OG01586	70	LLG1_ARATH;GPI-anchored protein LLG1 {ECO:0000305}	NA	2	3	3
OG01587	70	CMTA2_ARATH;Calmodulin-binding transcription activator 2 {ECO:0000303|PubMed:11925432}	IQ;PF00612.30^Ank_2;PF12796.10^CG-1;PF03859.19^Ank_4;PF13637.9	3	2	4
OG01588	70	YUID_BACSU;Uncharacterized membrane protein YuiD	DUF212;PF02681.17	2	2	5
OG01589	70	SQS10_PANGI;Squalene synthase 10 {ECO:0000303|PubMed:25642758}	SQS_PSY;PF00494.22	1	1	1
OG01590	70	NA	NA	2	2	3
OG01591	70	P2C70_ORYSJ;Probable protein phosphatase 2C 70	PP2C;PF00481.24	2	2	3
OG01592	70	LACS2_ARATH;Long chain acyl-CoA synthetase 2	AMP-binding;PF00501.31	2	2	3
OG01593	70	MEBL_ARATH;Membrane protein of ER body-like protein	VIT1;PF01988.22^Fascin;PF06268.16	3	3	6
OG01594	70	TE1_MAIZE;Protein terminal ear1	RRM_2;PF04059.15	2	2	2
OG01595	70	SWET1_ARATH;Bidirectional sugar transporter SWEET1 {ECO:0000303|PubMed:21107422}	MtN3_slv;PF03083.19	2	2	4
OG01596	70	PER2_ORYSJ;Peroxidase 2	peroxidase;PF00141.26	1	2	3
OG01597	70	ERDL7_ARATH;Sugar transporter ERD6-like 7	MFS_1;PF07690.19^Sugar_tr;PF00083.27	2	2	2
OG01598	70	NIP23_MAIZE;Aquaporin NIP2-3	MIP;PF00230.23	3	3	6
OG01599	70	ZFP4_ARATH;Zinc finger protein 4 {ECO:0000305}	NA	2	2	4
OG01600	70	SWT16_ORYSJ;Bidirectional sugar transporter SWEET16	MtN3_slv;PF03083.19	3	3	6
OG01601	70	ZED1_ARATH;Non-functional pseudokinase ZED1 {ECO:0000305}	Pkinase;PF00069.28^PK_Tyr_Ser-Thr;PF07714.20	4	9	10
OG01604	69	BC10_ORYSJ;Glycosyltransferase BC10 {ECO:0000305}	Branch;PF02485.24	2	2	2
OG01605	69	ABCG2_PIG;Broad substrate specificity ATP-binding cassette transporter ABCG2 {ECO:0000305}	ABC2_membrane_7;PF19055.3^ABC_tran;PF00005.30^AAA_21;PF13304.9	2	2	4
OG01606	69	RBX1B_ARATH;RING-box protein 1b	zf-rbx1;PF12678.10^zf-ANAPC11;PF12861.10	3	6	5
OG01607	69	M3K20_ARATH;Mitogen-activated protein kinase kinase kinase 20 {ECO:0000303|PubMed:21969089}	Pkinase;PF00069.28^PK_Tyr_Ser-Thr;PF07714.20	1	4	5
OG01608	69	NA	Hydrolase_4;PF12146.11^Abhydrolase_1;PF00561.23^Abhydrolase_6;PF12697.10^Abhydrolase_11;PF20408.1^Peptidase_S9;PF00326.24	2	2	4
OG01609	69	HRT2_HEVBR;Rubber cis-polyprenyltransferase HRT2	Prenyltransf;PF01255.22	5	4	7
OG01610	69	XAT2_ORYSJ;Alpha-13-arabinosyltransferase XAT2 {ECO:0000305}	Glyco_transf_61;PF04577.17	2	2	2
OG01611	69	WOX2_ORYSJ;Putative WUSCHEL-related homeobox 2	Homeodomain;PF00046.32	2	2	3
OG01612	69	MRS2A_ARATH;Magnesium transporter MRS2-10	CorA;PF01544.21	6	5	1
OG01613	69	FUT6_ARATH;Fucosyltransferase 6	XG_FTase;PF03254.16	5	7	10
OG01614	69	FAR1_ARATH;Protein FAR-RED IMPAIRED RESPONSE 1	FAR1;PF03101.18^MULE;PF10551.12	2	16	37
OG01615	69	XTH_BRAOB;Xyloglucan endotransglucosylase/hydrolase	Glyco_hydro_16;PF00722.24^XET_C;PF06955.15	2	2	3
OG01616	69	EX70I_MEDTR;Exocyst complex component EXO70I {ECO:0000303|PubMed:26234213}	Exo70;PF03081.18	2	2	5
OG01617	69	M3K20_ARATH;Mitogen-activated protein kinase kinase kinase 20 {ECO:0000303|PubMed:21969089}	PK_Tyr_Ser-Thr;PF07714.20^Pkinase;PF00069.28	1	1	2
OG01618	69	BZP53_ARATH;bZIP transcription factor 53 {ECO:0000303|PubMed:11906833}	bZIP_1;PF00170.24^bZIP_2;PF07716.18	2	3	4
OG01619	69	HOX1_ORYSI;Homeobox-leucine zipper protein HOX1	HALZ;PF02183.21^Homeodomain;PF00046.32	2	2	3
OG01620	69	EDR2_ARATH;Protein ENHANCED DISEASE RESISTANCE 2	START;PF01852.22^EDR2_C;PF07059.15^PH;PF00169.32	2	2	2
OG01621	69	BH075_ARATH;Transcription factor bHLH75	NA	1	2	5
OG01622	69	PTBP1_ARATH;Polypyrimidine tract-binding protein homolog 1	RRM_1;PF00076.25^RRM_8;PF11835.11^RRM_5;PF13893.9	2	2	1
OG01623	69	NU2C1_ATRBE;NAD(P)H-quinone oxidoreductase subunit 2 A chloroplastic {ECO:0000255|HAMAP-Rule:MF_00445}	Proton_antipo_M;PF00361.23^Ndh2_N;PF19530.2	1	0	1
OG01624	69	CCT13_ORYSJ;Cyclin-T1-3	Cyclin_N;PF00134.26	1	2	2
OG01625	69	PPR14_ARATH;Pentatricopeptide repeat-containing protein At1g06140 mitochondrial	DUF863;PF05904.14^PPR;PF01535.23^PPR_2;PF13041.9^PPR_3;PF13812.9	1	1	2
OG01626	69	PPDEX_ARATH;DeSI-like protein At4g17486	Peptidase_C97;PF05903.17	2	2	4
OG01627	69	ASR2_SOLLC;Abscisic stress-ripening protein 2 {ECO:0000303|PubMed:7846175}	ABA_WDS;PF02496.19	2	3	10
OG01628	69	IF5_PHAVU;Eukaryotic translation initiation factor 5	W2;PF02020.21^eIF-5_eIF-2B;PF01873.20	1	1	2
OG01629	69	SEC14_ASHGO;SEC14 cytosolic factor	CRAL_TRIO;PF00650.23^CRAL_TRIO_N;PF03765.18	1	1	2
OG01630	69	PYRG2_CHICK;CTP synthase 2	CTP_synth_N;PF06418.17^GATase;PF00117.31	2	2	4
OG01631	69	GRF1_ARATH;Growth-regulating factor 1	QLQ;PF08880.14^WRC;PF08879.13	2	2	4
OG01632	69	PTR27_ARATH;Protein NRT1/ PTR FAMILY 6.2	PTR2;PF00854.24^MFS_1;PF07690.19	3	3	5
OG01633	69	ATL1_ARATH;RING-H2 finger protein ATL1	zf-C3HC4_2;PF13923.9^zf-RING_2;PF13639.9^zf-RING_11;PF17123.8^zf-rbx1;PF12678.10^zf-C3HC4;PF00097.28	2	2	3
OG01634	69	RL13A_HUMAN;Large ribosomal subunit protein uL13 {ECO:0000303|PubMed:24524803}	Ribosomal_L13;PF00572.21	1	2	3
OG01635	69	UBTD2_DANRE;Ubiquitin domain-containing protein 2	UBD;PF16455.8	2	2	3
OG01636	69	DOGL2_ARATH;Protein DOG1-like 2 {ECO:0000303|PubMed:17065317}	DOG1;PF14144.9	1	1	1
OG01637	69	MOB1B_HUMAN;MOB kinase activator 1B	Mob1_phocein;PF03637.20	1	1	1
OG01638	69	ZFP34_ORYSJ;Probable E3 ubiquitin-protein ligase RZFP34 {ECO:0000305}	zf-CHY;PF05495.15^zinc_ribbon_6;PF14599.9^zf-RING_2;PF13639.9^zf-RING_UBOX;PF13445.9^zf-RING_5;PF14634.9	3	3	4
OG01639	69	FLA17_ARATH;Fasciclin-like arabinogalactan protein 17	Fasciclin;PF02469.25	1	1	1
OG01640	69	BRXL1_ORYSJ;Protein Brevis radix-like 1	BRX;PF08381.14^BRX_N;PF13713.9	2	2	3
OG01641	69	NA	NT-C2;PF10358.12	2	2	3
OG01642	69	FB202_ARATH;Putative F-box protein At3g52320	FBA_3;PF08268.15^F-box;PF00646.36^FBA_1;PF07734.16^F-box-like;PF12937.10	0	3	4
OG01643	69	XTH32_ARATH;Probable xyloglucan endotransglucosylase/hydrolase protein 32	Glyco_hydro_16;PF00722.24^XET_C;PF06955.15	2	2	2
OG01644	69	STOX_BERWI;Tetrahydroberberine oxidase {ECO:0000303|PubMed:3402447}	FAD_binding_4;PF01565.26^BBE;PF08031.15	3	3	5
OG01645	69	VA712_ARATH;Vesicle-associated membrane protein 712 {ECO:0000303|PubMed:11115874}	Longin;PF13774.9^Synaptobrevin;PF00957.24	2	2	3
OG01646	69	RS12_CHICK;Small ribosomal subunit protein eS12 {ECO:0000305}	Ribosomal_L7Ae;PF01248.29	2	2	4
OG01647	69	NA	Tetraspanin;PF00335.23	2	2	4
OG01648	69	SAU32_ARATH;Auxin-responsive protein SAUR32 {ECO:0000305}	Auxin_inducible;PF02519.17	0	1	2
OG01649	69	DNAK_NEOYE;Chaperone protein dnaK	MreB_Mbl;PF06723.16^HSP70;PF00012.23	2	2	3
OG01650	69	IQD17_ARATH;Protein IQ-DOMAIN 17 {ECO:0000303|PubMed:16368012}	IQ;PF00612.30^DUF4005;PF13178.9^RRM_1;PF00076.25	2	2	5
OG01651	69	B2_DAUCA;B2 protein	Kelch_1;PF01344.28^Kelch_6;PF13964.9^Kelch_2;PF07646.18^Kelch_5;PF13854.9^Kelch_4;PF13418.9^Kelch_3;PF13415.9^Dev_Cell_Death;PF10539.12	2	2	3
OG01652	69	RL3_NEUCR;Large ribosomal subunit protein uL3 {ECO:0000303|PubMed:34815343}	Ribosomal_L3;PF00297.25	2	2	2
OG01653	69	NA	DUF3675;PF12428.11^RINGv;PF12906.10	2	3	4
OG01654	69	NA	NA	1	1	4
OG01655	69	AVIL_MOUSE;Advillin {ECO:0000305}	zf-CCHC;PF00098.26^Retrotrans_gag;PF03732.20	0	1	0
OG01658	68	FABF_STAAR;3-oxoacyl-[acyl-carrier-protein] synthase 2	ketoacyl-synt;PF00109.29^Ketoacyl-synt_C;PF02801.25	2	2	1
OG01659	68	STOX_ARGME;Tetrahydroberberine oxidase {ECO:0000305}	FAD_binding_4;PF01565.26^BBE;PF08031.15	3	3	7
OG01660	68	TRB5_ARATH;Telomere repeat-binding factor 5	Myb_DNA-binding;PF00249.34^Linker_histone;PF00538.22^Myb_DNA-bind_6;PF13921.9	2	2	2
OG01661	68	PGLR_RHIRD;Polygalacturonase	Pectate_lyase_3;PF12708.10^Beta_helix;PF13229.9^Glyco_hydro_28;PF00295.20	2	2	3
OG01662	68	PRK3_ARATH;Pollen receptor-like kinase 3 {ECO:0000303|PubMed:12139002}	LRR_8;PF13855.9^LRR_4;PF12799.10^PK_Tyr_Ser-Thr;PF07714.20^Pkinase;PF00069.28^LRR_1;PF00560.36^LRRNT_2;PF08263.15	2	2	1
OG01663	68	NA	DUF1195;PF06708.14	2	2	3
OG01664	68	GYAR_THEPD;Glyoxylate reductase {ECO:0000255|HAMAP-Rule:MF_00776}	2-Hacid_dh_C;PF02826.22^2-Hacid_dh;PF00389.33^NAD_binding_2;PF03446.18	2	2	0
OG01665	68	NA	NA	2	4	9
OG01666	68	TPP4_ORYSJ;Probable trehalose-phosphate phosphatase 4	Trehalose_PPase;PF02358.19	1	2	3
OG01667	68	MYC2_ARATH;Transcription factor MYC2	bHLH-MYC_N;PF14215.9^HLH;PF00010.29	2	2	4
OG01668	68	VUP1_ARATH;Vascular-related unknown protein 1 {ECO:0000303|PubMed:24567189}	NA	2	3	3
OG01669	68	BC10_ORYSJ;Glycosyltransferase BC10 {ECO:0000305}	Branch;PF02485.24	3	3	3
OG01670	68	RL44_CANAL;Large ribosomal subunit protein eL42 {ECO:0000303|PubMed:35613268}	Ribosomal_L44;PF00935.22	1	1	2
OG01671	68	BC10_ORYSJ;Glycosyltransferase BC10 {ECO:0000305}	Branch;PF02485.24	2	2	4
OG01672	68	SAHH_MESCR;Adenosylhomocysteinase	AdoHcyase;PF05221.20^AdoHcyase_NAD;PF00670.24^2-Hacid_dh_C;PF02826.22	2	2	4
OG01673	68	RL5_CUCSA;Large ribosomal subunit protein uL18 {ECO:0000305}	Ribosomal_L18_c;PF14204.9^Ribosomal_L5e;PF17144.7	2	2	4
OG01674	68	RL37_ICTPU;Large ribosomal subunit protein eL37 {ECO:0000305}	Ribosomal_L37e;PF01907.22	2	3	3
OG01675	68	RPK2_ARATH;LRR receptor-like serine/threonine-protein kinase RPK2	LRR_4;PF12799.10^LRR_8;PF13855.9^LRR_1;PF00560.36^PK_Tyr_Ser-Thr;PF07714.20^Pkinase;PF00069.28^LRRNT_2;PF08263.15^LRR_6;PF13516.9	1	2	3
OG01676	68	NA	Agenet;PF05641.15^ENT;PF03735.17	2	2	3
OG01677	68	INVA_VICFA;Acid beta-fructofuranosidase	Glyco_hydro_32N;PF00251.23^Glyco_hydro_32C;PF08244.15^INV_N;PF11837.11	2	2	2
OG01678	68	GALM_HUMAN;Galactose mutarotase {ECO:0000303|PubMed:12753898 ECO:0000303|PubMed:15026423}	Aldose_epim;PF01263.23	3	3	4
OG01679	68	RK14_CALFG;Large ribosomal subunit protein uL14c {ECO:0000255|HAMAP-Rule:MF_01367}	Hyccin;PF09790.12	3	8	9
OG01680	68	MYO10_ARATH;Myosin-10	IQ;PF00612.30^DIL;PF01843.22^Myosin_head;PF00063.24^Myosin_N;PF02736.22	2	2	3
OG01681	68	CYB5B_MOUSE;Cytochrome b5 type B	Cyt-b5;PF00173.31	1	3	1
OG01682	68	CTF18_EMENI;Chromosome transmission fidelity protein 18	Ank_5;PF13857.9^Ank_4;PF13637.9^Ank_3;PF13606.9^Ank_2;PF12796.10^Ank;PF00023.33	2	2	2
OG01683	68	NIK1_ARATH;Protein NSP-INTERACTING KINASE 1 {ECO:0000303|PubMed:15489295}	LRR_8;PF13855.9^LRR_4;PF12799.10^PK_Tyr_Ser-Thr;PF07714.20^Pkinase;PF00069.28^LRRNT_2;PF08263.15	2	2	2
OG01684	68	APS1_ARATH;ATP sulfurylase 1 chloroplastic	ATP-sulfurylase;PF01747.20^PUA_2;PF14306.9	2	2	3
OG01685	68	SPAST_XENTR;Spastin {ECO:0000255|HAMAP-Rule:MF_03021}	AAA;PF00004.32^AAA_lid_3;PF17862.4	2	2	3
OG01686	68	CNR6_MAIZE;Cell number regulator 6	PLAC8;PF04749.20	3	3	5
OG01687	68	RL27_PYRST;Large ribosomal subunit protein eL27 {ECO:0000305}	Ribosomal_L27e;PF01777.21	1	2	2
OG01688	68	DTX19_ARATH;Protein DETOXIFICATION 19 {ECO:0000303|PubMed:11739388}	MatE;PF01554.21	1	2	2
OG01689	68	CDS2_MOUSE;Phosphatidate cytidylyltransferase 2 {ECO:0000305}	CTP_transf_1;PF01148.23	2	2	3
OG01690	68	GDL86_ARATH;GDSL esterase/lipase At5g45960	Lipase_GDSL;PF00657.25	2	2	4
OG01691	68	WRK69_ARATH;Probable WRKY transcription factor 69	WRKY;PF03106.18	2	3	3
OG01692	68	CX6B2_ARATH;Cytochrome c oxidase subunit 6b-2	COX6B;PF02297.20	2	2	5
OG01693	68	CVIF1_ARATH;Cell wall / vacuolar inhibitor of fructosidase 1	PMEI;PF04043.18	2	3	6
OG01694	68	RRAA3_ARATH;Putative 4-hydroxy-4-methyl-2-oxoglutarate aldolase 3	RraA-like;PF03737.18^PPR;PF01535.23	2	2	3
OG01695	68	PHY1_SELMA;Phytochrome 1	PAS_9;PF13426.10^PAS;PF00989.28^PAS_4;PF08448.13^PHY;PF00360.23^GAF;PF01590.29^PAS_2;PF08446.14^HisKA;PF00512.28^HATPase_c;PF02518.29^PAS_8;PF13188.10	1	1	2
OG01696	68	SIPL2_ORYSJ;Signal peptide peptidase-like 2	Peptidase_A22B;PF04258.16^PA;PF02225.25	2	2	3
OG01697	68	ACA9_ARATH;Calcium-transporting ATPase 9 plasma membrane-type	Cation_ATPase_C;PF00689.24^E1-E2_ATPase;PF00122.23^Cation_ATPase;PF13246.9^Hydrolase;PF00702.29^CaATP_NAI;PF12515.11^Cation_ATPase_N;PF00690.29	2	2	4
OG01698	68	HIBC3_ARATH;Probable 3-hydroxyisobutyryl-CoA hydrolase 3	NA	6	2	5
OG01699	68	SYM1_ASPOR;Protein sym1	Mpv17_PMP22;PF04117.15^LRR_4;PF12799.10	2	2	3
OG01700	68	AT21A_ARATH;Putative RING-H2 finger protein ATL21A	GUB_WAK_bind;PF13947.9^zf-RING_2;PF13639.9^zf-rbx1;PF12678.10^WAK_assoc;PF14380.9^zf-RING_11;PF17123.8^zf-C3HC4_2;PF13923.9^zf-C3HC4;PF00097.28^zf-RING_UBOX;PF13445.9	1	1	1
OG01701	68	RS16_ORYSJ;Small ribosomal subunit protein uS9 {ECO:0000305}	Ribosomal_S9;PF00380.22	1	1	2
OG01702	68	COP1_ARATH;E3 ubiquitin-protein ligase COP1 {ECO:0000303|PubMed:1423630}	WD40;PF00400.35^zf-C3HC4_2;PF13923.9^zf-C3HC4;PF00097.28^WD40_like;PF17005.8^zf-C3HC4_3;PF13920.9^ANAPC4_WD40;PF12894.10	3	3	5
OG01703	68	FIS1A_ARATH;Mitochondrial fission 1 protein A	Fis1_TPR_C;PF14853.9^Fis1_TPR_N;PF14852.9	3	2	3
OG01704	68	CY1_KLULA;Cytochrome c1 heme protein mitochondrial	Cytochrom_C1;PF02167.18	1	1	2
OG01705	68	DRP4C_ARATH;Dynamin-related protein 4C	Dynamin_M;PF01031.23^GED;PF02212.21^Dynamin_N;PF00350.26^TPR_2;PF07719.20^TPR_1;PF00515.31	5	6	2
OG01706	68	RL131_BRANA;Large ribosomal subunit protein eL13z {ECO:0000305}	Ribosomal_L13e;PF01294.21	5	2	4
OG01707	68	RBG7_ARATH;Glycine-rich RNA-binding protein 7 {ECO:0000303|PubMed:11809873 ECO:0000303|PubMed:16207746}	RRM_1;PF00076.25	2	1	2
OG01708	68	PM1_SOYBN;18 kDa seed maturation protein	LEA_1;PF03760.18	2	2	4
OG01709	68	TRXH_WHEAT;Thioredoxin H-type	Thioredoxin;PF00085.23^Thioredoxin_2;PF13098.9^Thioredoxin_8;PF13905.9	2	2	2
OG01710	68	AT74H_ARATH;Phosphoglycerate mutase-like protein AT74H {ECO:0000305}	His_Phos_1;PF00300.25	1	2	3
OG01712	68	RL23_BRUMA;Large ribosomal subunit protein uL14 {ECO:0000305}	F-box-like;PF12937.10^F-box;PF00646.36	1	2	6
OG01713	68	R13L1_ARATH;Putative disease resistance RPP13-like protein 1	LRR_4;PF12799.10^LRR_8;PF13855.9^NB-ARC;PF00931.25^Rx_N;PF18052.4^AAA_16;PF13191.9	31	27	10
OG01717	67	WRK24_ORYSI;WRKY transcription factor WRKY24 {ECO:0000303|PubMed:16919842}	WRKY;PF03106.18	2	2	3
OG01719	67	DYL1_HUMAN;Dynein light chain 1 cytoplasmic	Dynein_light;PF01221.21	3	3	4
OG01720	67	FBXL4_MOUSE;F-box/LRR-repeat protein 4	LRR_6;PF13516.9^LRR_4;PF12799.10	2	3	7
OG01721	67	STY13_ARATH;Serine/threonine-protein kinase STY13 {ECO:0000305}	PK_Tyr_Ser-Thr;PF07714.20^Pkinase;PF00069.28	1	1	2
OG01722	67	RS62_ARATH;Small ribosomal subunit protein eS6y {ECO:0000303|PubMed:36423343}	Ribosomal_S6e;PF01092.22	1	1	2
OG01723	67	SEC13_SCHPO;Protein transport protein sec13	WD40;PF00400.35^ANAPC4_WD40;PF12894.10	2	4	3
OG01724	67	RITF1_ARATH;Protein RGF1 INDUCIBLE TRANSCRIPTION FACTOR 1 {ECO:0000303|PubMed:31801996}	PLATZ;PF04640.17	1	1	3
OG01725	67	RL26_SCHPO;Large ribosomal subunit protein uL24 {ECO:0000305}	Ribosomal_L26;PF16906.8^KOW;PF00467.32	1	3	4
OG01726	67	LAZ1_ARATH;Protein LAZ1 {ECO:0000303|PubMed:20830211}	Solute_trans_a;PF03619.19	2	3	4
OG01727	67	WTR17_ARATH;WAT1-related protein At3g18200	EamA;PF00892.23	2	2	4
OG01728	67	DAO_ORYSI;2-oxoglutarate-dependent dioxygenase DAO	2OG-FeII_Oxy;PF03171.23^DIOX_N;PF14226.9	1	1	3
OG01729	67	TBL19_ARATH;Protein trichome birefringence-like 19	PC-Esterase;PF13839.9^PMR5N;PF14416.9	2	3	3
OG01730	67	Y4372_ARATH;Probable LRR receptor-like serine/threonine-protein kinase At4g37250	LRR_8;PF13855.9^LRR_4;PF12799.10^PK_Tyr_Ser-Thr;PF07714.20^Pkinase;PF00069.28^LRRNT_2;PF08263.15^LRR_1;PF00560.36^LRR_6;PF13516.9	2	2	4
OG01731	67	RL142_ARATH;Large ribosomal subunit protein eL14y {ECO:0000303|PubMed:36423343}	Ribosomal_L14e;PF01929.20	1	1	1
OG01732	67	RBP1C_ARATH;Ran-binding protein 1 homolog c	Ran_BP1;PF00638.21	2	2	4
OG01733	67	RH15_ARATH;DEAD-box ATP-dependent RNA helicase 15	Helicase_C;PF00271.34^DEAD;PF00270.32	3	1	3
OG01734	67	PPDEX_ARATH;DeSI-like protein At4g17486	Peptidase_C97;PF05903.17	2	2	3
OG01735	67	BRH1_ARATH;Brassinosteroid-responsive RING protein 1 {ECO:0000303|PubMed:12012249}	zf-RING_2;PF13639.9^zf-RING_11;PF17123.8^zf-C3HC4_2;PF13923.9^zf-rbx1;PF12678.10^zf-C3HC4;PF00097.28^zf-RING_5;PF14634.9	2	2	4
OG01736	67	CDC24_ARATH;Cell division cycle 20.4 cofactor of APC complex	WD40;PF00400.35^ANAPC4_WD40;PF12894.10^eIF2A;PF08662.14	2	2	3
OG01737	67	BCCP_NEOYE;Biotin carboxyl carrier protein of acetyl-CoA carboxylase	Biotin_lipoyl;PF00364.25^Biotin_lipoyl_2;PF13533.9	1	1	2
OG01738	67	PCP_MOUSE;Lysosomal Pro-X carboxypeptidase	Peptidase_S28;PF05577.15	4	4	5
OG01739	67	RMA2_ARATH;E3 ubiquitin-protein ligase RMA2	zf-C3HC4_2;PF13923.9^zf-C3HC4_3;PF13920.9^zf-C3HC4;PF00097.28^zf-RING_2;PF13639.9^zf-RING_5;PF14634.9^zf-RING_UBOX;PF13445.9	2	2	4
OG01740	67	FTSH3_ORYSJ;ATP-dependent zinc metalloprotease FTSH 3 mitochondrial	Peptidase_M41;PF01434.21^AAA_lid_3;PF17862.4^AAA;PF00004.32^FtsH_ext;PF06480.18	2	2	3
OG01741	67	TIF4B_ARATH;Protein TIFY 4B	Ank_2;PF12796.10^Ank_4;PF13637.9^Ank_5;PF13857.9^Ank_3;PF13606.9^Ank;PF00023.33^PGG;PF13962.9	6	5	6
OG01742	67	GIF3_ARATH;GRF1-interacting factor 3	SSXT;PF05030.15	2	2	4
OG01743	67	FB253_ARATH;F-box protein At5g07610	F-box;PF00646.36^F-box-like;PF12937.10	2	3	3
OG01744	67	CSPLI_MAIZE;CASP-like protein 5B3	CASP_dom;PF04535.15	2	3	2
OG01745	67	PGAP3_XENTR;Post-GPI attachment to proteins factor 3	Per1;PF04080.16	2	2	4
OG01746	67	ANX1_GOSHI;Annexin Gh1 {ECO:0000303|PubMed:12787021 ECO:0000303|PubMed:16331990 ECO:0000303|PubMed:18441010}	Annexin;PF00191.23	2	2	3
OG01747	67	CK3_ARATH;Probable choline kinase 3	Choline_kinase;PF01633.23^APH;PF01636.26	2	3	4
OG01748	67	ACP4_CUPLA;Acyl carrier protein 4 chloroplastic	NA	2	2	4
OG01749	67	BRG2_ARATH;Probable BOI-related E3 ubiquitin-protein ligase 2	zf-C3HC4_3;PF13920.9	2	3	3
OG01750	67	FEZ_ARATH;Protein FEZ	NAM;PF02365.18	2	2	4
OG01751	67	NA	DUF599;PF04654.15	2	3	6
OG01752	67	NA	NA	2	2	2
OG01754	67	BH162_ARATH;Transcription factor bHLH162	HLH;PF00010.29	4	5	8
OG01755	67	GGAP2_ARATH;GDP-L-galactose phosphorylase 2	NA	2	2	6
OG01756	67	P2C13_ARATH;Probable protein phosphatase 2C 13	PP2C;PF00481.24	2	2	3
OG01757	67	ARL8D_ARATH;ADP-ribosylation factor-like protein 8d {ECO:0000303|PubMed:22174675}	Ras;PF00071.25^Arf;PF00025.24^Roc;PF08477.16^Gtr1_RagA;PF04670.15^MMR_HSR1;PF01926.26^SRPRB;PF09439.13^G-alpha;PF00503.23	2	2	4
OG01758	67	MUR3_ARATH;Xyloglucan galactosyltransferase MUR3 {ECO:0000305}	Exostosin;PF03016.18	3	3	6
OG01759	67	PM19L_ORYSJ;Membrane protein PM19L {ECO:0000305}	AWPM-19;PF05512.14	2	2	4
OG01760	67	FB316_ARATH;F-box protein At1g61340	NA	1	1	4
OG01761	67	PMTI_ARATH;Probable methyltransferase PMT18	Methyltransf_11;PF08241.15^Methyltransf_29;PF03141.19^Methyltransf_25;PF13649.9^Methyltransf_23;PF13489.9	2	2	2
OG01762	67	C04C1_PINTA;Cytochrome P450 704C1	p450;PF00067.25	2	3	3
OG01763	67	NA	PsbX;PF06596.14	2	2	3
OG01764	67	DOF22_ARATH;Dof zinc finger protein DOF2.2	zf-Dof;PF02701.18	2	2	3
OG01765	67	IF1A_DICDI;Eukaryotic translation initiation factor 1A	eIF-1a;PF01176.22	3	3	5
OG01766	67	TMK2_ARATH;Receptor-like kinase TMK2 {ECO:0000303|PubMed:23613767}	LRR_8;PF13855.9^LRR_4;PF12799.10^LRRNT_2;PF08263.15^Pkinase;PF00069.28^PK_Tyr_Ser-Thr;PF07714.20	2	2	4
OG01767	67	SNX2A_ARATH;Sorting nexin 2A	PX;PF00787.27^Vps5;PF09325.13	2	2	4
OG01768	67	ADNT1_ARATH;Mitochondrial adenine nucleotide transporter ADNT1	Mito_carr;PF00153.30	2	3	3
OG01769	67	CBSX2_ARATH;CBS domain-containing protein CBSX2 chloroplastic	CBS;PF00571.31	2	2	4
OG01770	67	Y1465_ARATH;Late embryogenesis abundant protein At1g64065 {ECO:0000305}	LEA_2;PF03168.16	3	5	6
OG01771	67	FH5_ARATH;Formin-like protein 5	FH2;PF02181.26	2	2	3
OG01772	67	ZDH23_ARATH;Probable protein S-acyltransferase 6	DHHC;PF01529.23	2	2	4
OG01773	67	PER73_ARATH;Peroxidase 73	peroxidase;PF00141.26	2	2	4
OG01774	67	RPB8B_ARATH;DNA-directed RNA polymerases II IV and V subunit 8B	RNA_pol_Rpb8;PF03870.18^RNA_pol_RpbG;PF16992.8	2	2	4
OG01775	67	ATPBM_NICPL;ATP synthase subunit beta mitochondrial	ATP-synt_ab;PF00006.28^ATP-synt_ab_N;PF02874.26^Synthase_beta;PF11421.11	2	2	3
OG01776	67	NGR_MEDTR;Protein NEGATIVE GRAVITROPIC RESPONSE OF ROOTS {ECO:0000303|PubMed:27748769}	NA	2	2	5
OG01777	67	CIPK8_ARATH;CBL-interacting serine/threonine-protein kinase 8	Pkinase;PF00069.28^PK_Tyr_Ser-Thr;PF07714.20^NAF;PF03822.17^Kinase-like;PF14531.9	3	3	4
OG01778	67	AGDP1_ARATH;Protein AGENET DOMAIN (AGD)-CONTAINING P1 {ECO:0000303|PubMed:30382101}	Agenet;PF05641.15	2	2	5
OG01780	67	C2GR1_ARATH;C2 and GRAM domain-containing protein At1g03370	Cornifin;PF02389.18	0	3	2
OG01782	67	R1B16_SOLDE;Putative late blight resistance protein homolog R1B-16	NB-LRR;PF12061.11^NB-ARC;PF00931.25^AAA_16;PF13191.9	21	21	25
OG01785	66	NA	DUF716;PF04819.15	5	4	2
OG01786	66	SYP71_ARATH;Syntaxin-71	SNARE;PF05739.22	2	2	4
OG01787	66	HMGC2_MOUSE;3-hydroxy-3-methylglutaryl-CoA lyase cytoplasmic	DUF659;PF04937.18	2	2	3
OG01788	66	KN14K_ORYSJ;Kinesin-like protein KIN-14K {ECO:0000305}	Kinesin;PF00225.26^Microtub_bd;PF16796.8^CH;PF00307.34^Nup54_57_C;PF18570.4	3	3	2
OG01789	66	YBA9_SCHPO;Uncharacterized protein C119.09c	ORMDL;PF04061.17	2	2	3
OG01790	66	RS7_SCHPO;Small ribosomal subunit protein eS7 {ECO:0000305}	Ribosomal_S7e;PF01251.21	3	2	3
OG01791	66	U71E1_STERE;UDP-glycosyltransferase 71E1 {ECO:0000303|PubMed:15610349}	UDPGT;PF00201.21	12	13	20
OG01792	66	HA22A_ARATH;HVA22-like protein a	TB2_DP1_HVA22;PF03134.22	2	2	4
OG01793	66	OFT29_ARATH;O-fucosyltransferase 29 {ECO:0000305}	O-FucT;PF10250.12	1	2	3
OG01794	66	RS27_HORVU;Small ribosomal subunit protein eS27 {ECO:0000305}	Ribosomal_S27e;PF01667.20	2	1	2
OG01795	66	CRK1_ARATH;Cysteine-rich receptor-like protein kinase 1 {ECO:0000305}	Stress-antifung;PF01657.20^PK_Tyr_Ser-Thr;PF07714.20^Pkinase;PF00069.28	3	3	5
OG01796	66	CCD51_ARATH;Cyclin-D5-1	Cyclin_N;PF00134.26^Cyclin_C;PF02984.22	2	2	4
OG01797	66	P4H11_ARATH;Probable prolyl 4-hydroxylase 11 {ECO:0000305}	2OG-FeII_Oxy_3;PF13640.9^2OG-FeII_Oxy;PF03171.23	2	2	3
OG01798	66	GAT15_ARATH;GATA transcription factor 15	GATA;PF00320.30	4	2	7
OG01799	66	TLP10_ORYSJ;Tubby-like F-box protein 10	Tub;PF01167.21^F-box;PF00646.36	2	2	2
OG01800	66	GBLP_DANRE;Small ribosomal subunit protein RACK1 {ECO:0000305}	WD40;PF00400.35^NBCH_WD40;PF20426.1^ANAPC4_WD40;PF12894.10^Myb_DNA-binding;PF00249.34^Myb_DNA-bind_6;PF13921.9^eIF2A;PF08662.14	1	1	3
OG01801	66	BOR6_ARATH;Probable boron transporter 6	HCO3_cotransp;PF00955.24	1	1	2
OG01802	66	GATLA_ARATH;Probable galacturonosyltransferase-like 10	Glyco_transf_8;PF01501.23	2	1	4
OG01803	66	TBL2_ARATH;Protein trichome birefringence-like 2	PC-Esterase;PF13839.9^PMR5N;PF14416.9	2	2	4
OG01804	66	ATL72_ARATH;RING-H2 finger protein ATL72	zf-RING_2;PF13639.9^zf-RING_11;PF17123.8^zf-C3HC4_2;PF13923.9^zf-rbx1;PF12678.10	2	2	4
OG01805	66	CLH1_MOUSE;Clathrin heavy chain 1	Clathrin;PF00637.23^Clathrin_propel;PF01394.23^Clathrin-link;PF09268.13^Clathrin_H_link;PF13838.9	1	2	2
OG01806	66	H4_CAIMO;Histone H4	LEA_2;PF03168.16^PPR;PF01535.23^PPR_2;PF13041.9^PPR_1;PF12854.10^PPR_3;PF13812.9^PPR_long;PF17177.7	3	4	5
OG01807	66	BOB2_ARATH;Protein BOBBER 2	CS;PF04969.19	2	2	3
OG01808	66	SLAH3_ARATH;S-type anion channel SLAH3	SLAC1;PF03595.20	1	1	3
OG01809	66	PDR17_YEAST;Phosphatidylinositol transfer protein PDR17	CRAL_TRIO;PF00650.23^CRAL_TRIO_N;PF03765.18	2	2	3
OG01810	66	RER1_HUMAN;Protein RER1	Rer1;PF03248.16	1	1	1
OG01811	66	NDR1_ARATH;Protein NDR1	NA	1	1	1
OG01812	66	S404_ARATH;Protein S40-4 {ECO:0000303|PubMed:20238146}	Senescence_reg;PF04520.16	1	1	3
OG01813	66	CDKC1_ARATH;Cyclin-dependent kinase C-1	Pkinase;PF00069.28^PK_Tyr_Ser-Thr;PF07714.20	2	2	4
OG01814	66	CPC_ARATH;Transcription factor CPC	Myb_DNA-binding;PF00249.34	4	3	7
OG01815	66	BZR2_ORYSJ;Protein BZR1 homolog 2 {ECO:0000303|PubMed:30920691}	BES1_N;PF05687.16	2	2	4
OG01816	66	SODC_IPOBA;Superoxide dismutase [Cu-Zn]	Sod_Cu;PF00080.23	4	4	4
OG01817	66	FAO1_LOTJA;Long-chain-alcohol oxidase FAO1	GMC_oxred_N;PF00732.22^GMC_oxred_C;PF05199.16^FAD_binding_2;PF00890.27	3	4	4
OG01818	66	YL728_MIMIV;Uncharacterized protein L728	DUF2828;PF11443.11	2	2	1
OG01819	66	PP166_ARATH;Pentatricopeptide repeat-containing protein At2g20710 mitochondrial	PPR;PF01535.23^PPR_2;PF13041.9^PPR_3;PF13812.9^PPR_long;PF17177.7^PPR_1;PF12854.10^TPR_19;PF14559.9^TPR_7;PF13176.9^TPR_14;PF13428.9	3	2	6
OG01820	66	KPRS1_ARATH;Ribose-phosphate pyrophosphokinase 1 chloroplastic	Pribosyl_synth;PF14572.9^Pribosyltran;PF00156.30^Pribosyltran_N;PF13793.9	2	2	4
OG01821	66	SDI2_ARATH;Protein SULFUR DEFICIENCY-INDUCED 2 {ECO:0000305}	TPR_1;PF00515.31^TPR_2;PF07719.20^TPR_12;PF13424.9^TPR_8;PF13181.9^TPR_19;PF14559.9	2	2	3
OG01822	66	SBT43_ARATH;Subtilisin-like protease SBT4.3 {ECO:0000303|PubMed:16193095}	Peptidase_S8;PF00082.25^fn3_6;PF17766.4^Inhibitor_I9;PF05922.19	5	3	3
OG01823	66	IF4G_ARATH;Eukaryotic translation initiation factor 4G	MIF4G;PF02854.22^MA3;PF02847.20	2	1	2
OG01824	66	FRI2_VIGUN;Ferritin-2 chloroplastic	Ferritin;PF00210.27	2	2	5
OG01825	66	RNBP6_MOUSE;Ran-binding protein 6	HEAT_EZ;PF13513.9^HEAT;PF02985.25^HEAT_2;PF13646.9^MMS19_C;PF12460.11^Vac14_Fab1_bd;PF12755.10^Cnd1;PF12717.10^Importin_rep_6;PF18829.4^Importin_rep_4;PF18808.4^Arm;PF00514.26^IFRD;PF05004.16^PDS5;PF20168.1^Adaptin_N;PF01602.23^DUF577;PF04510.15^RIX1;PF08167.15^DUF3385;PF11865.11	1	1	2
OG01826	66	BH095_ARATH;Transcription factor bHLH95 {ECO:0000303|PubMed:14600211}	HLH;PF00010.29	1	1	1
OG01827	66	EF2_BETVU;Elongation factor 2	EFG_C;PF00679.27^EFG_IV;PF03764.21^GTP_EFTU;PF00009.30^GTP_EFTU_D2;PF03144.28^EFG_III;PF14492.9	3	2	4
OG01828	66	ARI4_ARATH;Putative E3 ubiquitin-protein ligase ARI4	IBR;PF01485.24^Ariadne;PF19422.2	3	3	4
OG01829	66	SEI3_ARATH;Seipin-3 {ECO:0000303|PubMed:26362606}	Seipin;PF06775.17	2	2	4
OG01830	66	Y1540_ARATH;Uncharacterized protein At1g15400	DUF4666;PF15697.8	2	2	5
OG01831	66	GAP22_ARATH;Rab GTPase-activating protein 22 {ECO:0000303|PubMed:16332933}	RabGAP-TBC;PF00566.21	2	4	3
OG01832	66	CML36_ARATH;Probable calcium-binding protein CML36	EF-hand_1;PF00036.35^EF-hand_6;PF13405.9^EF-hand_8;PF13833.9^EF-hand_5;PF13202.9^EF-hand_7;PF13499.9^EF-hand_9;PF14658.9	1	1	3
OG01833	66	LIP4_ARATH;GDSL esterase/lipase LIP-4	Lipase_GDSL;PF00657.25	1	1	2
OG01834	66	C3H44_ARATH;Zinc finger CCCH domain-containing protein 44	GYF;PF02213.19^SWIB;PF02201.21^Plus-3;PF03126.21	2	1	2
OG01835	66	TMK3_ARATH;Receptor-like kinase TMK3 {ECO:0000303|PubMed:23613767}	LRR_4;PF12799.10^LRR_8;PF13855.9^LRRNT_2;PF08263.15^Pkinase;PF00069.28^PK_Tyr_Ser-Thr;PF07714.20^LRR_1;PF00560.36	3	2	4
OG01836	66	UBP46_CAEEL;Ubiquitin carboxyl-terminal hydrolase 46	UCH;PF00443.32^UCH_1;PF13423.9	2	2	5
OG01837	66	NA	DUF1685;PF07939.14	2	3	5
OG01838	66	YR831_MIMIV;Putative serine/threonine-protein kinase/receptor R831	DUF1221;PF06760.14^PK_Tyr_Ser-Thr;PF07714.20^Pkinase;PF00069.28	2	3	3
OG01840	66	NA	NA	6	9	14
OG01843	65	RS13_PYRHO;Small ribosomal subunit protein uS13 {ECO:0000255|HAMAP-Rule:MF_01315}	Ribosomal_S13;PF00416.25	1	1	2
OG01844	65	BPC2_ARATH;Protein BASIC PENTACYSTEINE2 {ECO:0000303|PubMed:21435046}	GAGA_bind;PF06217.15	2	2	2
OG01845	65	Y1054_ORYSJ;B3 domain-containing protein Os01g0905400	B3;PF02362.24	1	1	1
OG01846	65	E70A3_ARATH;Exocyst complex component EXO70A3 {ECO:0000303|PubMed:16942608 ECO:0000303|PubMed:31299202}	Exo70;PF03081.18	2	2	3
OG01847	65	RIR2C_ARATH;Ribonucleoside-diphosphate reductase small chain C	Ribonuc_red_sm;PF00268.24^Dynamin_N;PF00350.26	7	4	3
OG01848	65	AMPD_ORYSJ;Probable AMP deaminase	AMP_deaminase;PF19326.2^A_deaminase;PF00962.25	2	2	4
OG01849	65	GLO13_ORYSJ;Very-long-chain aldehyde decarbonylase GL1-3 {ECO:0000305}	FA_hydroxylase;PF04116.16^Wax2_C;PF12076.11	2	2	3
OG01850	65	IQD10_ARATH;Protein IQ-DOMAIN 10 {ECO:0000303|PubMed:16368012}	NA	2	3	4
OG01851	65	CRPK1_ARATH;Cold-responsive protein kinase 1 {ECO:0000303|PubMed:28344081}	Pkinase;PF00069.28^PK_Tyr_Ser-Thr;PF07714.20	2	2	4
OG01852	65	SMR15_ARATH;Cyclin-dependent protein kinase inhibitor SMR15 {ECO:0000303|PubMed:26546445}	NA	1	2	2
OG01853	65	UBN1_ARATH;Ubinuclein-1 {ECO:0000303|PubMed:25086063}	NA	2	2	4
OG01855	65	Y4869_ORYSJ;B3 domain-containing protein Os04g0386900	B3;PF02362.24	4	4	8
OG01856	65	RBS4_SOLLC;Ribulose bisphosphate carboxylase small subunit chloroplastic 4 {ECO:0000255|HAMAP-Rule:MF_00860}	RuBisCO_small;PF00101.23^RbcS;PF12338.11	1	1	2
OG01857	65	P4H4_ARATH;Probable prolyl 4-hydroxylase 4 {ECO:0000305}	2OG-FeII_Oxy_3;PF13640.9^2OG-FeII_Oxy;PF03171.23	2	3	4
OG01858	65	NPG1_ARATH;Protein NPG1 {ECO:0000303|PubMed:12928497}	TPR_2;PF07719.20^TPR_19;PF14559.9^TPR_1;PF00515.31^TPR_11;PF13414.9^TPR_8;PF13181.9^TPR_12;PF13424.9^TPR_16;PF13432.9^TPR_14;PF13428.9^TPR_7;PF13176.9^ANAPC3;PF12895.10^TPR_17;PF13431.9	2	2	3
OG01859	65	DRIP1_ARATH;E3 ubiquitin protein ligase DRIP1	zf-C3HC4_2;PF13923.9	1	1	1
OG01860	65	AMT21_ORYSJ;Ammonium transporter 2 member 1	Ammonium_transp;PF00909.24	2	2	4
OG01861	65	COB21_ARATH;Coatomer subunit beta'-1	WD40;PF00400.35^Coatomer_WDAD;PF04053.17^NBCH_WD40;PF20426.1	1	1	2
OG01862	65	NC101_ARATH;NAC domain-containing protein 101 {ECO:0000303|PubMed:15029955}	NAM;PF02365.18	2	2	6
OG01863	65	RS20_PIG;Small ribosomal subunit protein uS10 {ECO:0000305}	Ribosomal_S10;PF00338.25	2	2	4
OG01864	65	WAKLP_ARATH;Wall-associated receptor kinase-like 15	PK_Tyr_Ser-Thr;PF07714.20^Pkinase;PF00069.28^GUB_WAK_bind;PF13947.9^RCC1_2;PF13540.9^RCC1;PF00415.21	4	4	2
OG01865	65	ASPG1_ARATH;Protein ASPARTIC PROTEASE IN GUARD CELL 1	Asp;PF00026.26^TAXi_N;PF14543.9^TAXi_C;PF14541.9	3	3	4
OG01866	65	NA	Remorin_C;PF03763.16	2	2	4
OG01867	65	UXS5_ARATH;UDP-glucuronic acid decarboxylase 5	NAD_binding_4;PF07993.15^Polysacc_synt_2;PF02719.18^GDP_Man_Dehyd;PF16363.8^3Beta_HSD;PF01073.22^Epimerase;PF01370.24^RmlD_sub_bind;PF04321.20	2	2	3
OG01868	65	ARID2_ARATH;AT-rich interactive domain-containing protein 2	LRR_4;PF12799.10^LRR_8;PF13855.9^Myb_DNA-binding;PF00249.34	2	2	4
OG01869	65	MIZ1_ARATH;Protein MIZU-KUSSEI 1	DUF617;PF04759.16	2	2	3
OG01870	65	MIRO3_ARATH;Mitochondrial Rho GTPase 3	Ras;PF00071.25^EF_assoc_1;PF08355.15^Roc;PF08477.16^EF_assoc_2;PF08356.15^MMR_HSR1;PF01926.26^AAA_16;PF13191.9	1	2	4
OG01871	65	IX10L_ARATH;Probable beta-14-xylosyltransferase IRX10L	Exostosin;PF03016.18	1	1	2
OG01872	65	BT2_ARATH;BTB/POZ and TAZ domain-containing protein 2	BTB;PF00651.34^zf-TAZ;PF02135.19	1	1	2
OG01873	65	KAO_ORYSJ;Ent-kaurenoic acid oxidase {ECO:0000305}	p450;PF00067.25	6	4	9
OG01874	65	SUT_SPIOL;Sucrose transport protein	MFS_2;PF13347.9^MFS_1;PF07690.19	2	2	3
OG01875	65	P2A10_ARATH;Protein PHLOEM PROTEIN 2-LIKE A10	NA	2	2	5
OG01876	65	FREE1_ARATH;Protein FREE1 {ECO:0000303|PubMed:25438943}	FYVE;PF01363.24	2	2	4
OG01877	65	Y1572_ARATH;WEB family protein At1g75720	WEMBL;PF05701.14	2	2	5
OG01878	65	LBD3_ARATH;LOB domain-containing protein 3	LOB;PF03195.17	2	1	4
OG01879	65	TTL4_ARATH;TPR repeat-containing thioredoxin TTL4	TPR_2;PF07719.20^TPR_1;PF00515.31^TPR_11;PF13414.9^TPR_19;PF14559.9^TPR_8;PF13181.9^TPR_16;PF13432.9^TPR_14;PF13428.9^TPR_17;PF13431.9^Thioredoxin;PF00085.23^TPR_12;PF13424.9^TPR_9;PF13371.9^ANAPC3;PF12895.10^TPR_7;PF13176.9^TPR_6;PF13174.9	1	1	1
OG01880	65	RGL2_ARATH;DELLA protein RGL2 {ECO:0000303|PubMed:11877383}	GRAS;PF03514.17	2	7	10
OG01881	65	FRB1_ARATH;Protein FRIABLE 1 {ECO:0000303|PubMed:22916179 ECO:0000312|EMBL:ARJ31446.1}	O-FucT;PF10250.12	2	2	4
OG01882	65	FMP32_YEAST;Protein FMP32 mitochondrial	CCDC90-like;PF07798.14	2	2	3
OG01883	65	NA	EGF;PF00008.30	4	3	5
OG01884	65	CH60A_ARATH;Chaperonin CPN60 mitochondrial	Cpn60_TCP1;PF00118.27	3	3	3
OG01885	65	CNBL4_ARATH;Calcineurin B-like protein 4 {ECO:0000303|PubMed:10590166}	EF-hand_6;PF13405.9^EF-hand_1;PF00036.35^EF-hand_5;PF13202.9^EF-hand_7;PF13499.9^EF-hand_8;PF13833.9	2	4	5
OG01886	65	SPL12_ARATH;Squamosa promoter-binding-like protein 12	SBP;PF03110.17^Ank_3;PF13606.9^Ank_2;PF12796.10	2	2	3
OG01887	65	Y2317_ARATH;Probable leucine-rich repeat receptor-like protein kinase At2g33170	LRR_8;PF13855.9^LRR_4;PF12799.10^LRR_1;PF00560.36^PK_Tyr_Ser-Thr;PF07714.20^Pkinase;PF00069.28^LRRNT_2;PF08263.15	2	2	3
OG01888	65	MIFH_TRITR;Macrophage migration inhibitory factor homolog	MIF;PF01187.21	3	4	7
OG01889	65	WAV3_ARATH;E3 ubiquitin-protein ligase WAV3 {ECO:0000305}	VWA_CoxE;PF05762.17^VWA_2;PF13519.9^VWA;PF00092.31^VWA_3;PF13768.9^Vwaint;PF14624.9^zf-RING_11;PF17123.8^zf-RING_2;PF13639.9^zf-rbx1;PF12678.10	2	2	3
OG01890	65	AKRCA_ARATH;Aldo-keto reductase family 4 member C10	Aldo_ket_red;PF00248.24	1	2	2
OG01891	65	MO3_ARATH;Monooxygenase 3 {ECO:0000303|PubMed:10216258}	FAD_binding_3;PF01494.22^Lycopene_cycl;PF05834.15^DAO;PF01266.27	3	3	5
OG01892	65	SC61B_ARATH;Protein transport protein Sec61 subunit beta	Sec61_beta;PF03911.19	2	2	5
OG01893	65	RL8_DICDI;Large ribosomal subunit protein uL2 {ECO:0000305}	Ribosomal_L2;PF00181.26^Ribosomal_L2_C;PF03947.21	1	1	2
OG01894	65	GLR24_ARATH;Glutamate receptor 2.4	SBP_bac_3;PF00497.23^ANF_receptor;PF01094.31^Peripla_BP_6;PF13458.9^Lig_chan;PF00060.29^Lig_chan-Glu_bd;PF10613.12	3	7	10
OG01895	65	CAB25_ARATH;Calmodulin-binding protein 25 {ECO:0000303|PubMed:15086802}	VQ;PF05678.17	1	1	2
OG01896	65	GBF4_ARATH;G-box-binding factor 4	bZIP_1;PF00170.24^bZIP_2;PF07716.18	2	2	3
OG01897	65	NA	NA	2	2	4
OG01898	65	CXE2_PAPSO;3-O-acetylpapaveroxine carboxylesterase CXE2 {ECO:0000305}	Abhydrolase_3;PF07859.16^BD-FAE;PF20434.1^COesterase;PF00135.31	1	1	2
OG01899	65	GSTZ1_DIACA;Glutathione S-transferase 1	GST_N_3;PF13417.9^GST_N;PF02798.23^GST_N_2;PF13409.9^GST_C_3;PF14497.9	4	5	9
OG01900	65	VINSY_RAUSE;Vinorine synthase {ECO:0000303|PubMed:15110860}	Transferase;PF02458.18	1	1	1
OG01904	64	FKB65_ARATH;Peptidyl-prolyl cis-trans isomerase FKBP65	FKBP_C;PF00254.31^TPR_2;PF07719.20^TPR_1;PF00515.31^TPR_8;PF13181.9^FKBP_N_2;PF18023.4^TPR_16;PF13432.9^TPR_11;PF13414.9^TPR_19;PF14559.9^PPR_2;PF13041.9	2	2	4
OG01905	64	MYB05_ANTMA;Myb-related protein 305	Myb_DNA-binding;PF00249.34^Myb_DNA-bind_6;PF13921.9	1	1	2
OG01906	64	Y1686_ARATH;Uncharacterized membrane protein At1g16860	NA	1	1	2
OG01907	64	BH035_ARATH;Transcription factor bHLH35	HLH;PF00010.29	4	3	5
OG01908	64	ZAT9_ARATH;Zinc finger protein ZAT9	zf-C2H2_6;PF13912.9^zf-C2H2_4;PF13894.9^zf-C2H2_jaz;PF12171.11^zf-C2H2;PF00096.29^zf-met;PF12874.10	1	0	6
OG01909	64	XTH2_ARATH;Xyloglucan endotransglucosylase/hydrolase protein 2	Glyco_hydro_16;PF00722.24^XET_C;PF06955.15	2	2	4
OG01910	64	GDL76_ARATH;GDSL esterase/lipase At5g14450	Lipase_GDSL;PF00657.25	4	4	3
OG01911	64	E139_ARATH;Glucan endo-13-beta-glucosidase 9	Glyco_hydro_17;PF00332.21^X8;PF07983.16	2	2	5
OG01912	64	FAOMT_VITVI;Flavonoid 3'5'-methyltransferase	Methyltransf_3;PF01596.20^Methyltransf_24;PF13578.9	1	1	2
OG01913	64	COBL4_ARATH;COBRA-like protein 4	COBRA;PF04833.18	2	2	4
OG01914	64	GEML3_ARATH;Putative GEM-like protein 3	GRAM;PF02893.23	2	2	4
OG01915	64	E132_ARATH;Glucan endo-13-beta-glucosidase 2	Glyco_hydro_17;PF00332.21^X8;PF07983.16	2	3	4
OG01916	64	STY13_ARATH;Serine/threonine-protein kinase STY13 {ECO:0000305}	PK_Tyr_Ser-Thr;PF07714.20^Pkinase;PF00069.28	2	2	2
OG01917	64	VPS2C_ARATH;Vacuolar protein sorting-associated protein 2 homolog 3	Snf7;PF03357.24	2	3	4
OG01918	64	DR100_ARATH;DNA damage-repair/toleration protein DRT100	LRR_8;PF13855.9^LRR_4;PF12799.10^LRR_1;PF00560.36^LRR_6;PF13516.9^LRRNT_2;PF08263.15	3	4	4
OG01919	64	Y1666_ARATH;Uncharacterized protein At1g76660	NA	2	2	3
OG01920	64	ODPB_PEA;Pyruvate dehydrogenase E1 component subunit beta mitochondrial	Transket_pyr;PF02779.27^Transketolase_C;PF02780.23	2	2	2
OG01921	64	GL93_ORYSJ;Germin-like protein 9-3	Cupin_1;PF00190.25^Cupin_2;PF07883.14	1	2	5
OG01922	64	GMPPB_BOVIN;Mannose-1-phosphate guanyltransferase beta	Hexapep;PF00132.27^NTP_transferase;PF00483.26^NTP_transf_3;PF12804.10	2	2	4
OG01923	64	TRPE_ARATH;Anthranilate synthase alpha subunit 1 chloroplastic {ECO:0000303|PubMed:7972519}	Chorismate_bind;PF00425.21^Anth_synt_I_N;PF04715.16	2	2	5
OG01924	64	NC2A_MOUSE;Dr1-associated corepressor	CBFD_NFYB_HMF;PF00808.26	2	2	3
OG01925	64	DCL2_ARATH;Endoribonuclease Dicer homolog 2	Ribonucleas_3_3;PF14622.9^Ribonuclease_3;PF00636.29^PAZ;PF02170.25^Helicase_C;PF00271.34^Dicer_dimer;PF03368.17^ResIII;PF04851.18^DEAD;PF00270.32	7	5	9
OG01926	64	CCU22_ARATH;Cyclin-U2-2	Cyclin_N;PF00134.26^Cyclin;PF08613.14	2	2	4
OG01927	64	SCP32_ARATH;Serine carboxypeptidase-like 32	Peptidase_S10;PF00450.25	1	1	2
OG01928	64	DTX6_ARATH;Protein DETOXIFICATION 6 {ECO:0000303|PubMed:11739388}	MatE;PF01554.21	4	5	8
OG01929	64	BGL34_ORYSJ;Beta-glucosidase 34	Glyco_hydro_1;PF00232.21	2	2	4
OG01930	64	ALMT6_ARATH;Aluminum-activated malate transporter 6	ALMT;PF11744.11^FUSC;PF04632.15^FUSC_2;PF13515.9^HEAT;PF02985.25^HEAT_2;PF13646.9	2	2	4
OG01931	64	Y1105_ARATH;Probable receptor-like protein kinase At1g11050	Pkinase;PF00069.28^PK_Tyr_Ser-Thr;PF07714.20^SPARK;PF19160.3	3	3	8
OG01932	64	OFUT9_ARATH;O-fucosyltransferase 9 {ECO:0000305}	O-FucT;PF10250.12	2	3	4
OG01933	64	Y2165_ARATH;Probable LRR receptor-like serine/threonine-protein kinase At2g16250	LRR_4;PF12799.10^LRR_8;PF13855.9^LRR_1;PF00560.36^PK_Tyr_Ser-Thr;PF07714.20^Pkinase;PF00069.28	2	2	4
OG01934	64	TLPH_ARATH;Thaumatin-like protein	Thaumatin;PF00314.20	2	2	4
OG01935	64	BDTIR_BRADI;Probable 2' cyclic ADP-D-ribose synthase BdTIR {ECO:0000305}	TIR_2;PF13676.9^TIR;PF01582.23	2	2	4
OG01936	64	DGK5_ARATH;Diacylglycerol kinase 5	DAGK_acc;PF00609.22^DAGK_cat;PF00781.27	1	1	1
OG01937	64	GT14C_ARATH;Beta-glucuronosyltransferase GlcAT14C {ECO:0000305}	Branch;PF02485.24	1	1	2
OG01938	64	RSSA1_ARATH;Small ribosomal subunit protein uS2z {ECO:0000303|PubMed:36423343}	Ribosomal_S2;PF00318.23	1	1	3
OG01939	64	FLP5_ORYSJ;Flowering-promoting factor 1-like protein 5	Exo_endo_phos;PF03372.26^RVT_1;PF00078.30	0	0	1
OG01940	64	GILT_BOVIN;Gamma-interferon-inducible lysosomal thiol reductase	GILT;PF03227.19	2	3	4
OG01941	64	KPYK_STAAC;Pyruvate kinase	PK;PF00224.24^PK_C;PF02887.19	2	2	3
OG01942	64	STR2_PETHY;ABC transporter G family member STR2 {ECO:0000303|PubMed:25971550}	NA	1	1	2
OG01943	64	NA	NA	2	2	4
OG01944	64	CKX5_ORYSJ;Cytokinin dehydrogenase 5	Cytokin-bind;PF09265.13^FAD_binding_4;PF01565.26	1	1	2
OG01945	64	LTG13_ARATH;Non-specific lipid transfer protein GPI-anchored 13 {ECO:0000303|PubMed:23893219}	LTP_2;PF14368.9^Tryp_alpha_amyl;PF00234.25	2	2	4
OG01946	64	BET11_ARATH;Bet1-like SNARE 1-1	NA	2	2	3
OG01947	64	PME28_ARATH;Putative pectinesterase/pectinesterase inhibitor 28	Pectinesterase;PF01095.22^PMEI;PF04043.18	1	2	1
OG01948	64	Y1864_ARATH;Probable receptor-like protein kinase At1g80640	PK_Tyr_Ser-Thr;PF07714.20^Pkinase;PF00069.28	2	2	4
OG01949	64	DIR12_ARATH;Dirigent protein 12	NA	2	2	3
OG01950	64	LSU3_ARATH;Protein RESPONSE TO LOW SULFUR 3 {ECO:0000303|PubMed:25628631}	NA	1	1	2
OG01951	64	RBM42_XENLA;RNA-binding protein 42	RRM_1;PF00076.25^LRR_4;PF12799.10^LRR_8;PF13855.9^LRR_1;PF00560.36	3	15	7
OG01952	64	SBT15_ARATH;Subtilisin-like protease SBT1.5 {ECO:0000303|PubMed:16193095}	Peptidase_S8;PF00082.25^PA;PF02225.25^fn3_6;PF17766.4^Inhibitor_I9;PF05922.19	1	1	2
OG01953	64	Y2881_DICDI;Uncharacterized protein DDB_G0288155	Hexapep;PF00132.27^Hexapep_2;PF14602.9	2	2	3
OG01954	64	RB11C_TOBAC;Ras-related protein Rab11C	Arf;PF00025.24^Ras;PF00071.25^Roc;PF08477.16	2	2	3
OG01955	64	NA	DUF1442;PF07279.14	2	2	4
OG01956	64	SR45A_ARATH;Serine/arginine-rich splicing factor SR45a	RRM_1;PF00076.25	3	3	5
OG01957	64	FB341_ARATH;F-box protein At5g49610	NA	1	1	1
OG01958	64	ZAT9_ARATH;Zinc finger protein ZAT9	zf-C2H2_6;PF13912.9^zf-C2H2_4;PF13894.9^zf-C2H2_jaz;PF12171.11	1	1	2
OG01959	64	ACLY_BOVIN;ATP-citrate synthase	ATP-grasp_2;PF08442.13^Citrate_bind;PF16114.8	2	2	3
OG01961	64	GL52_ORYSJ;Germin-like protein 5-1	Cupin_1;PF00190.25^Cupin_2;PF07883.14	1	1	2
OG01962	64	MPK13_ARATH;Mitogen-activated protein kinase 13	Pkinase;PF00069.28^PK_Tyr_Ser-Thr;PF07714.20^Kdo;PF06293.17	2	4	3
OG01963	64	ZHD10_ARATH;Zinc-finger homeodomain protein 10	NA	0	3	8
OG01965	64	M3K17_ARATH;Mitogen-activated protein kinase kinase kinase 17 {ECO:0000303|PubMed:25720833}	Pkinase;PF00069.28^PK_Tyr_Ser-Thr;PF07714.20	0	4	3
OG01970	63	BSL2_ORYSJ;Serine/threonine-protein phosphatase BSL2 homolog	Kelch_3;PF13415.9^Kelch_4;PF13418.9^Kelch_2;PF07646.18^Kelch_5;PF13854.9^Kelch_1;PF01344.28^Kelch_6;PF13964.9^Metallophos;PF00149.31	1	1	2
OG01971	63	FAFL_ARATH;Protein FAF-like chloroplastic	FAF;PF11250.11	1	1	2
OG01972	63	MSI5_ARATH;WD-40 repeat-containing protein MSI5 {ECO:0000305}	WD40;PF00400.35^CAF1C_H4-bd;PF12265.11	2	2	3
OG01973	63	MCU2_ARATH;Calcium uniporter protein 2 mitochondrial	MCU;PF04678.16	2	1	2
OG01974	63	RL7A_RAT;Large ribosomal subunit protein eL8 {ECO:0000305}	Ribosomal_L7Ae;PF01248.29	2	2	2
OG01975	63	SRK2F_ARATH;Serine/threonine-protein kinase SRK2F	Pkinase;PF00069.28^PK_Tyr_Ser-Thr;PF07714.20	2	2	4
OG01976	63	MORC6_ARATH;Protein MICRORCHIDIA 6 {ECO:0000303|PubMed:22555433}	Morc6_S5;PF17942.4^HATPase_c_3;PF13589.9^HATPase_c;PF02518.29	1	1	2
OG01977	63	GATL7_ARATH;Probable galacturonosyltransferase-like 7	NA	1	2	2
OG01978	63	RAP22_ARATH;Ethylene-responsive transcription factor RAP2-2	AP2;PF00847.23	2	3	4
OG01979	63	ATL38_ARATH;RING-H2 finger protein ATL38	zf-RING_2;PF13639.9^zf-RING_11;PF17123.8^zf-C3HC4_2;PF13923.9^zf-rbx1;PF12678.10^zf-C3HC4;PF00097.28^zf-RING_UBOX;PF13445.9	2	2	4
OG01980	63	NRPD7_ARATH;DNA-directed RNA polymerase IV subunit 7	CaM_binding;PF07839.14	1	2	2
OG01981	63	DRE2C_ORYSJ;Dehydration-responsive element-binding protein 2C	AP2;PF00847.23	3	4	5
OG01982	63	RHC2A_ARATH;Probable E3 ubiquitin-protein ligase RHC2A {ECO:0000305}	DUF1117;PF06547.15^zinc_ribbon_9;PF14369.9^zf-RING_2;PF13639.9^zf-C3HC4_2;PF13923.9^zf-rbx1;PF12678.10^zf-RING_11;PF17123.8	2	2	4
OG01983	63	AGD3_ARATH;ADP-ribosylation factor GTPase-activating protein AGD3	Ank_3;PF13606.9^Ank;PF00023.33^Ank_4;PF13637.9^Ank_5;PF13857.9^Ank_2;PF12796.10^ArfGap;PF01412.21^PH;PF00169.32^BAR_3;PF16746.8^BAR;PF03114.21	2	3	4
OG01984	63	PMTB_ARATH;Probable methyltransferase PMT11	Methyltransf_11;PF08241.15^Methyltransf_29;PF03141.19^Methyltransf_25;PF13649.9^Methyltransf_23;PF13489.9	1	1	2
OG01985	63	ASPGB_ARATH;Probable isoaspartyl peptidase/L-asparaginase 2	Asparaginase_2;PF01112.21	2	2	4
OG01986	63	AIPP3_ARATH;ASI1-immunoprecipitated protein 3 {ECO:0000303|PubMed:28808009 ECO:0000303|PubMed:33277495 ECO:0000303|PubMed:33433058}	Med26;PF08711.14^BAH;PF01426.21	1	1	2
OG01987	63	CALM4_ARATH;Calmodulin-4	NA	2	2	6
OG01988	63	BRTL3_ARATH;Probable mitochondrial adenine nucleotide transporter BTL3	Mito_carr;PF00153.30	2	2	4
OG01989	63	FLZ8_ARATH;FCS-Like Zinc finger 8 {ECO:0000303|PubMed:24901469}	zf-FLZ;PF04570.17	2	2	4
OG01990	63	NA	DUF1644;PF07800.15	3	2	5
OG01991	63	GT21_ORYSJ;Probable glucuronosyltransferase Os02g0520750	NA	2	3	3
OG01992	63	RS17_MOUSE;Small ribosomal subunit protein eS17 {ECO:0000305}	Ribosomal_S17e;PF00833.21	2	2	2
OG01993	63	GRTP6_CAEEL;Growth hormone-regulated TBC protein 6	RabGAP-TBC;PF00566.21	2	2	3
OG01994	63	CWC22_CAEBR;Pre-mRNA-splicing factor CWC22 homolog	MIF4G;PF02854.22^MA3;PF02847.20	2	3	1
OG01995	63	M3K2_ARATH;Mitogen-activated protein kinase kinase kinase 2	PK_Tyr_Ser-Thr;PF07714.20^Pkinase;PF00069.28^Kinase-like;PF14531.9	1	1	2
OG01996	63	GSXL5_ARATH;Flavin-containing monooxygenase FMO GS-OX-like 5	FMO-like;PF00743.22^DAO;PF01266.27^Pyr_redox_3;PF13738.9^Pyr_redox;PF00070.30^NAD_binding_8;PF13450.9^Pyr_redox_2;PF07992.17^NAD_binding_9;PF13454.9^HI0933_like;PF03486.17^Amino_oxidase;PF01593.27^Lys_Orn_oxgnase;PF13434.9^FAD_binding_2;PF00890.27	8	6	11
OG01997	63	TBL30_ARATH;Protein trichome birefringence-like 30	PC-Esterase;PF13839.9^PMR5N;PF14416.9	1	1	2
OG01998	63	GNL2_ARATH;ARF guanine-nucleotide exchange factor GNL2	Sec7_N;PF12783.10^Sec7;PF01369.23^DCB;PF16213.8	2	2	2
OG01999	63	EX84A_ARATH;Exocyst complex component EXO84A	Exo84_C;PF16528.8^Vps51;PF08700.14	2	2	3
OG02000	63	TAR4_ARATH;Tryptophan aminotransferase-related protein 4	Alliinase_C;PF04864.16^EGF_alliinase;PF04863.16^Aminotran_1_2;PF00155.24	5	3	6
OG02001	63	RCE1_ARATH;NEDD8-conjugating enzyme Ubc12	UQ_con;PF00179.29	2	1	2
OG02002	63	U496K_ARATH;UPF0496 protein At1g20180	DUF677;PF05055.15	1	3	3
OG02003	63	SKI25_ARATH;F-box/kelch-repeat protein SKIP25	Kelch_6;PF13964.9^Kelch_1;PF01344.28^Kelch_2;PF07646.18	2	2	3
OG02004	63	NAL1_ORYSJ;Protein NARROW LEAF 1 {ECO:0000303|PubMed:18562767}	NA	2	2	3
OG02005	63	TPS1A_ASPNG;Alphaalpha-trehalose-phosphate synthase [UDP-forming] 1	Glyco_transf_20;PF00982.24^Trehalose_PPase;PF02358.19	2	2	2
OG02006	63	R18A1_ARATH;Large ribosomal subunit protein eL20z {ECO:0000303|PubMed:36423343 ECO:0000305}	NA	2	3	3
OG02007	63	P2C10_ARATH;Probable protein phosphatase 2C 10	PP2C;PF00481.24	2	2	4
OG02008	63	RIC10_ARATH;CRIB domain-containing protein RIC10	PBD;PF00786.31	1	1	2
OG02009	63	SCL4_ARATH;Scarecrow-like protein 4	GRAS;PF03514.17	3	4	4
OG02010	63	FAH1_ARATH;Dihydroceramide fatty acyl 2-hydroxylase FAH1 {ECO:0000305}	FA_hydroxylase;PF04116.16	2	3	7
OG02011	63	FB285_ARATH;F-box protein At5g46170	F-box-like;PF12937.10	1	1	2
OG02012	63	USPL1_ARATH;BURP domain protein USPL1 {ECO:0000303|PubMed:19639386}	BURP;PF03181.18	2	9	11
OG02013	63	Y4361_ARATH;Probable LRR receptor-like serine/threonine-protein kinase At4g36180	LRR_4;PF12799.10^LRR_8;PF13855.9^LRR_1;PF00560.36^LRR_6;PF13516.9^PK_Tyr_Ser-Thr;PF07714.20^Pkinase;PF00069.28^LRRNT_2;PF08263.15	2	2	4
OG02014	63	LSD1_ARATH;Protein LSD1	zf-LSD1;PF06943.15	1	2	3
OG02015	63	NA	NA	1	1	1
OG02016	63	RAB7_CENCI;Ras-related protein Rab7	Ras;PF00071.25^Roc;PF08477.16^Arf;PF00025.24^MMR_HSR1;PF01926.26	2	2	3
OG02017	63	RER4_ARATH;Protein RETICULATA-RELATED 4 chloroplastic {ECO:0000303|PubMed:23596191}	RETICULATA-like;PF11891.11	2	2	4
OG02018	63	HBL1_GOSHI;Non-symbiotic hemoglobin 1	Globin;PF00042.25	5	5	7
OG02019	63	HSD4A_ARATH;11-beta-hydroxysteroid dehydrogenase-like 4A	adh_short_C2;PF13561.9^adh_short;PF00106.28^KR;PF08659.13	3	1	2
OG02020	63	TRXM2_ARATH;Thioredoxin M2 chloroplastic {ECO:0000305}	Thioredoxin;PF00085.23^Thioredoxin_2;PF13098.9^Thioredoxin_9;PF14595.9	1	2	3
OG02021	63	PILR2_LINUS;Bifunctional pinoresinol-lariciresinol reductase 2	NmrA;PF05368.16^NAD_binding_10;PF13460.9^Epimerase;PF01370.24	3	3	6
OG02022	63	RS101_ARATH;Small ribosomal subunit protein eS10z {ECO:0000303|PubMed:36423343}	S10_plectin;PF03501.18	3	3	4
OG02023	63	PP424_ARATH;Pentatricopeptide repeat-containing protein At5g48730 chloroplastic	PPR;PF01535.23^PPR_1;PF12854.10^PPR_2;PF13041.9^PPR_3;PF13812.9^PPR_long;PF17177.7^MRP-S27;PF10037.12	3	3	2
OG02024	63	ACCO1_SOLLC;1-aminocyclopropane-1-carboxylate oxidase 1	2OG-FeII_Oxy;PF03171.23^DIOX_N;PF14226.9	2	4	4
OG02025	63	PME7_ARATH;Probable pectinesterase/pectinesterase inhibitor 7	Pectinesterase;PF01095.22^PMEI;PF04043.18	4	4	7
OG02026	63	Y4791_ARATH;Uncharacterized protein At4g17910	NA	1	1	2
OG02028	63	POLR1_ARATH;Retrovirus-related Pol polyprotein from transposon RE1	rve;PF00665.29^RVT_2;PF07727.17^gag_pre-integrs;PF13976.9^Retrotran_gag_2;PF14223.9	1	1	8
OG02029	63	NA	RVT_1;PF00078.30	0	1	1
OG02033	62	GOT1_ARATH;Vesicle transport protein GOT1 {ECO:0000303|PubMed:25900983}	Got1;PF04178.15	2	3	5
OG02034	62	VATE1_ARATH;V-type proton ATPase subunit E1	vATP-synt_E;PF01991.21	1	1	1
OG02035	62	YHM3_SCHPO;Uncharacterized FCP1 homology domain-containing protein C1271.03c	NIF;PF03031.21	1	1	2
OG02036	62	KCS4_ARATH;3-ketoacyl-CoA synthase 4 {ECO:0000303|PubMed:18465198}	ACP_syn_III_C;PF08541.13^FAE1_CUT1_RppA;PF08392.15^Chal_sti_synt_C;PF02797.18	1	1	2
OG02037	62	YJF5_YEAST;LOG family protein YJL055W	Lysine_decarbox;PF03641.17^LDcluster4;PF18306.4	2	2	6
OG02038	62	RS212_ARATH;Small ribosomal subunit protein eS21y {ECO:0000303|PubMed:36423343}	Ribosomal_S21e;PF01249.21	1	1	2
OG02039	62	PME3_ARATH;Pectinesterase/pectinesterase inhibitor 3	Pectinesterase;PF01095.22^PMEI;PF04043.18	1	1	2
OG02040	62	Y5713_ARATH;PI-PLC X domain-containing protein At5g67130	NA	2	2	3
OG02041	62	VIK_ARATH;Serine/threonine-protein kinase VIK {ECO:0000305|PubMed:19000166}	Ank;PF00023.33^Ank_5;PF13857.9^Ank_4;PF13637.9^Ank_2;PF12796.10^PK_Tyr_Ser-Thr;PF07714.20^Pkinase;PF00069.28^Ank_3;PF13606.9	2	4	3
OG02042	62	RS19_MYXGL;Small ribosomal subunit protein eS19 {ECO:0000305}	Ribosomal_S19e;PF01090.22	2	3	5
OG02043	62	2ABD_HUMAN;Serine/threonine-protein phosphatase 2A 55 kDa regulatory subunit B delta isoform	WD40;PF00400.35	1	1	1
OG02045	62	GATL8_ARATH;Probable galacturonosyltransferase-like 8	Glyco_transf_8;PF01501.23^Glyco_transf_24;PF18404.4	3	2	2
OG02046	62	KCR2_ARATH;Very-long-chain 3-oxoacyl-CoA reductase-like protein At1g24470	adh_short;PF00106.28^adh_short_C2;PF13561.9^KR;PF08659.13	3	3	4
OG02047	62	AKT2_ARATH;Potassium channel AKT2/3	Ank_4;PF13637.9^Ank;PF00023.33^Ank_3;PF13606.9^Ank_5;PF13857.9^Ank_2;PF12796.10^Ion_trans;PF00520.34^cNMP_binding;PF00027.32^Ion_trans_2;PF07885.19^KHA;PF11834.11	2	2	4
OG02048	62	ULP2B_ARATH;Probable ubiquitin-like-specific protease 2B	Peptidase_C48;PF02902.22	2	3	2
OG02049	62	TF80_MEDTR;GRAS family protein TF80 {ECO:0000305}	GRAS;PF03514.17	2	2	5
OG02050	62	NA	PAPA-1;PF04795.15^zf-HIT;PF04438.19	2	2	5
OG02051	62	MCFJ_DICDI;Mitochondrial substrate carrier family protein J	Mito_carr;PF00153.30	2	2	5
OG02052	62	P2C11_ARATH;Probable protein phosphatase 2C 11	PP2C;PF00481.24	2	2	4
OG02053	62	COPZ2_ARATH;Coatomer subunit zeta-2	Clat_adaptor_s;PF01217.23	1	2	3
OG02054	62	RHG1A_ARATH;Probable E3 ubiquitin-protein ligase RHG1A {ECO:0000305}	zf-RING_2;PF13639.9^zf-C3HC4_2;PF13923.9^zf-rbx1;PF12678.10	2	4	6
OG02055	62	PBL10_ARATH;Probable serine/threonine-protein kinase PBL10 {ECO:0000305}	PK_Tyr_Ser-Thr;PF07714.20^Pkinase;PF00069.28	2	2	2
OG02056	62	THO4A_ARATH;THO complex subunit 4A	RRM_1;PF00076.25^FoP_duplication;PF13865.9	2	3	3
OG02057	62	REXO4_ASHGO;RNA exonuclease 4	RNase_T;PF00929.27	2	2	4
OG02058	62	DTX39_ARATH;Protein DETOXIFICATION 39 {ECO:0000303|PubMed:11739388}	MatE;PF01554.21^Polysacc_synt_C;PF14667.9	1	2	3
OG02059	62	AMT12_ORYSJ;Ammonium transporter 1 member 2	Ammonium_transp;PF00909.24	3	3	2
OG02060	62	TBB1_LUPAL;Tubulin beta-1 chain	NA	1	1	1
OG02061	62	P24D9_ARATH;Transmembrane emp24 domain-containing protein p24delta9	EMP24_GP25L;PF01105.27	1	2	2
OG02062	62	TI142_ARATH;Mitochondrial import inner membrane translocase subunit TIM14-2	NA	2	3	5
OG02063	62	REP1_ORYSJ;Cysteine endopeptidase Rep1 {ECO:0000303|PubMed:10394640}	Peptidase_C1;PF00112.26^Inhibitor_I29;PF08246.15	2	2	4
OG02064	62	WTR38_ARATH;WAT1-related protein At5g07050	EamA;PF00892.23	1	1	2
OG02065	62	PHD1_ARATH;PHD finger-containing protein 1 {ECO:0000303|PubMed:33433058}	NA	2	2	5
OG02066	62	CNGC9_ARATH;Putative cyclic nucleotide-gated ion channel 9	Ion_trans;PF00520.34^cNMP_binding;PF00027.32	2	2	4
OG02067	62	BH032_ARATH;Transcription factor AIG1	HLH;PF00010.29	2	3	4
OG02068	62	TCP3_ARATH;Transcription factor TCP3	TCP;PF03634.16	2	3	4
OG02069	62	PUX4_ARATH;Plant UBX domain-containing protein 4 {ECO:0000303|Ref.6}	SEP;PF08059.16^UBX;PF00789.23^UBA_4;PF14555.9	1	1	2
OG02070	62	S61A2_ONCMY;Protein transport protein Sec61 subunit alpha isoform B	SecY;PF00344.23^Plug_translocon;PF10559.12	2	1	4
OG02071	62	TPS5_ARATH;Alphaalpha-trehalose-phosphate synthase [UDP-forming] 5	Glyco_transf_20;PF00982.24^Trehalose_PPase;PF02358.19^Hydrolase_3;PF08282.15	2	2	3
OG02072	62	EPFL2_ARATH;EPIDERMAL PATTERNING FACTOR-like protein 2 {ECO:0000303|PubMed:19435754}	EPF;PF17181.7	2	3	4
OG02073	62	PDI11_ARATH;Protein disulfide isomerase-like 1-1	Thioredoxin_6;PF13848.9^Thioredoxin_8;PF13905.9^OST3_OST6;PF04756.16^Thioredoxin;PF00085.23^Thioredoxin_2;PF13098.9^Thioredoxin_7;PF13899.9^AhpC-TSA;PF00578.24^Redoxin;PF08534.13	1	1	2
OG02074	62	NA	PNRC;PF15365.9	2	3	3
OG02075	62	DPH3_PONAB;Diphthamide biosynthesis protein 3 {ECO:0000305}	Glyco_hydro_43;PF04616.17	2	2	4
OG02076	62	WNK1_ORYSI;Probable serine/threonine-protein kinase WNK1	PK_Tyr_Ser-Thr;PF07714.20^Pkinase;PF00069.28^OSR1_C;PF12202.11	2	2	4
OG02077	62	SAT1_ARATH;Serine acetyltransferase 1 chloroplastic	Hexapep;PF00132.27^SATase_N;PF06426.17^Hexapep_2;PF14602.9	1	1	2
OG02078	62	CCD61_ARATH;Putative cyclin-D6-1	Cyclin_N;PF00134.26^Cyclin_C;PF02984.22^WD40;PF00400.35	2	3	3
OG02079	62	FPF1_SINAL;Flowering-promoting factor 1	NA	2	3	4
OG02080	62	ELF3_ARATH;Protein EARLY FLOWERING 3	NA	1	1	2
OG02081	62	PTR10_ARATH;Protein NRT1/ PTR FAMILY 5.16	MFS_1;PF07690.19^PTR2;PF00854.24	2	2	3
OG02082	62	OFP5_ARATH;Transcription repressor OFP5	DNA_binding_2;PF13724.9^Ovate;PF04844.16	2	2	3
OG02083	62	GIR1_ARATH;Protein GL2-INTERACTING REPRESSOR 1 {ECO:0000303|PubMed:28526410}	NA	1	1	1
OG02084	62	QKI_BOVIN;KH domain-containing RNA-binding protein QKI {ECO:0000250|UniProtKB:Q9QYS9}	STAR_dimer;PF16544.8	2	2	3
OG02085	62	TBP_SOLTU;TATA-box-binding protein	TBP;PF00352.24	3	4	6
OG02086	62	QR1_TRIVS;Quinone-oxidoreductase QR1 chloroplastic {ECO:0000303|PubMed:11260494}	ADH_zinc_N_2;PF13602.9^ADH_zinc_N;PF00107.29^ADH_N;PF08240.15	1	1	2
OG02087	62	RS14_CAEEL;Small ribosomal subunit protein uS11 {ECO:0000305}	Ribosomal_S11;PF00411.22	2	2	4
OG02088	62	ERD2B_ARATH;ER lumen protein-retaining receptor B	ER_lumen_recept;PF00810.21	1	1	1
OG02089	62	Y4345_ARATH;Probable receptor-like serine/threonine-protein kinase At4g34500	Pkinase;PF00069.28^PK_Tyr_Ser-Thr;PF07714.20	3	4	4
OG02090	62	PME24_ARATH;Putative pectinesterase/pectinesterase inhibitor 24	Pectinesterase;PF01095.22^PMEI;PF04043.18	1	2	2
OG02091	62	RKD2_ARATH;Protein RKD2	RWP-RK;PF02042.18	1	1	1
OG02092	62	D53_ORYSJ;Protein DWARF 53 {ECO:0000303|PubMed:24336200}	AAA_2;PF07724.17	2	2	4
OG02093	62	RS11_MACFA;Small ribosomal subunit protein uS17 {ECO:0000305}	Ribosomal_S17;PF00366.23^Ribosomal_S17_N;PF16205.8	1	1	1
OG02094	62	SRPK1_MOUSE;SRSF protein kinase 1	Pkinase;PF00069.28^PK_Tyr_Ser-Thr;PF07714.20	1	1	2
OG02095	62	LIAS_AEDAE;Lipoyl synthase mitochondrial {ECO:0000255|HAMAP-Rule:MF_03123}	LIAS_N;PF16881.8^Radical_SAM;PF04055.24	2	2	4
OG02096	62	ZB14_BRAJU;14 kDa zinc-binding protein	DcpS_C;PF11969.11^HIT;PF01230.26	2	3	4
OG02097	62	MAO1_ARATH;NAD-dependent malic enzyme 1 mitochondrial	Malic_M;PF03949.18^malic;PF00390.22^adh_short_C2;PF13561.9^adh_short;PF00106.28	2	3	4
OG02098	62	U1125_ARATH;U11/U12 small nuclear ribonucleoprotein 25 kDa protein	Ubiquitin_4;PF18036.4^ubiquitin;PF00240.26	1	1	2
OG02099	62	MCA1_PICST;Metacaspase-1	Peptidase_C14;PF00656.25^zf-LSD1;PF06943.15	2	2	3
OG02100	62	ACA5_ORYSJ;Calcium-transporting ATPase 5 plasma membrane-type {ECO:0000305}	Cation_ATPase_C;PF00689.24^Hydrolase;PF00702.29^E1-E2_ATPase;PF00122.23^Cation_ATPase;PF13246.9^Cation_ATPase_N;PF00690.29^CaATP_NAI;PF12515.11	2	2	3
OG02101	62	BRG1_ARATH;BOI-related E3 ubiquitin-protein ligase 1	zf-C3HC4_3;PF13920.9	1	2	4
OG02102	62	SSL8_ARATH;Protein STRICTOSIDINE SYNTHASE-LIKE 8 {ECO:0000303|PubMed:10777701}	Str_synth;PF03088.19^SGL;PF08450.15	10	8	15
OG02103	62	TBL43_ARATH;Protein trichome birefringence-like 43	PC-Esterase;PF13839.9^PMR5N;PF14416.9	3	7	6
OG02104	62	GLR24_ARATH;Glutamate receptor 2.4	ANF_receptor;PF01094.31^Lig_chan;PF00060.29^Peripla_BP_6;PF13458.9^SBP_bac_3;PF00497.23^Lig_chan-Glu_bd;PF10613.12	1	1	2
OG02105	62	FLOT4_MEDTR;Flotillin-like protein 4	Band_7;PF01145.28	4	4	5
OG02106	62	DRL12_ARATH;Probable disease resistance protein At1g59620	NB-ARC;PF00931.25^Rx_N;PF18052.4^AAA_16;PF13191.9^AAA_22;PF13401.9	4	4	9
OG02107	62	NA	Retrotrans_gag;PF03732.20^Ty3_capsid;PF19259.2	0	37	24
OG02112	61	RL10A_CAEEL;Large ribosomal subunit protein uL1 {ECO:0000305}	Ribosomal_L1;PF00687.24	1	1	2
OG02113	61	SCMC1_RABIT;Mitochondrial adenyl nucleotide antiporter SLC25A24 {ECO:0000250|UniProtKB:Q6NUK1}	Mito_carr;PF00153.30	2	2	3
OG02114	61	STXB2_RAT;Syntaxin-binding protein 2	Sec1;PF00995.26	2	2	4
OG02115	61	NA	NA	0	19	39
OG02116	61	CID12_ARATH;Polyadenylate-binding protein-interacting protein 12	RRM_1;PF00076.25^RRM_occluded;PF16842.8	1	1	2
OG02117	61	NAC66_ARATH;NAC domain-containing protein 66	NAM;PF02365.18	2	2	3
OG02118	61	NTF2_ORYSJ;Nuclear transport factor 2	NTF2;PF02136.23	2	2	3
OG02119	61	RTL3_ORYSJ;Ribonuclease 3-like protein 3	Ribonucleas_3_3;PF14622.9^Ribonuclease_3;PF00636.29	2	2	4
OG02120	61	PUB20_ARATH;U-box domain-containing protein 20	U-box;PF04564.18	2	2	5
OG02121	61	NA	Ank_3;PF13606.9^Ank;PF00023.33^Ank_5;PF13857.9^Ank_4;PF13637.9^Ank_2;PF12796.10^PGG;PF13962.9	2	2	6
OG02122	61	NA	NA	2	2	3
OG02123	61	MIEL1_ARATH;E3 ubiquitin-protein ligase MIEL1 {ECO:0000303|PubMed:23403577}	zf-CHY;PF05495.15^zinc_ribbon_6;PF14599.9^zf-RING_2;PF13639.9^zf-C3HC4_2;PF13923.9	2	2	4
OG02124	61	RBL4_ARATH;RHOMBOID-like protein 4 {ECO:0000303|PubMed:16223493 ECO:0000303|PubMed:17181860}	Rhomboid;PF01694.25	3	3	4
OG02125	61	GAT26_ARATH;GATA transcription factor 26	GATA;PF00320.30^ASXH;PF13919.9^RPN13_C;PF16550.8	2	2	3
OG02126	61	MYB25_ARATH;Transcription factor MYB25 {ECO:0000303|PubMed:11597504}	Myb_DNA-binding;PF00249.34^Myb_DNA-bind_6;PF13921.9	2	2	3
OG02127	61	FB118_ARATH;F-box protein At2g26850	F-box;PF00646.36	2	2	4
OG02128	61	NSE4B_ARATH;Non-structural maintenance of chromosomes element 4 homolog B	Nse4_C;PF08743.13	2	2	4
OG02129	61	AXS_ORYSJ;UDP-D-apiose/UDP-D-xylose synthase	Polysacc_synt_2;PF02719.18^GDP_Man_Dehyd;PF16363.8^Epimerase;PF01370.24^Sacchrp_dh_NADP;PF03435.21^3Beta_HSD;PF01073.22	1	1	2
OG02130	61	PLP3_ARATH;Patatin-like protein 3	Patatin;PF01734.25	1	1	2
OG02131	61	NA	NHL;PF01436.24	2	2	4
OG02132	61	P4H8_ARATH;Probable prolyl 4-hydroxylase 8 {ECO:0000305}	Lipase3_N;PF03893.19^Lipase_3;PF01764.28	2	2	3
OG02133	61	RL21_PYUST;Large ribosomal subunit protein eL21 {ECO:0000305}	Ribosomal_L21e;PF01157.21	1	2	1
OG02134	61	BURPE_ORYSJ;BURP domain-containing protein 14	BURP;PF03181.18	2	2	3
OG02135	61	EXB15_ORYSJ;Expansin-B15	DPBB_1;PF03330.21^Expansin_C;PF01357.24	2	3	5
OG02136	61	MES11_ARATH;Putative methylesterase 11 chloroplastic {ECO:0000303|PubMed:18467465}	Abhydrolase_6;PF12697.10^Abhydrolase_1;PF00561.23^Hydrolase_4;PF12146.11	1	1	2
OG02137	61	FB289_ARATH;F-box protein At5g51370	F-box-like;PF12937.10	2	2	4
OG02138	61	P2C34_ARATH;Probable protein phosphatase 2C 34	PP2C;PF00481.24	2	3	4
OG02139	61	EML4_ARATH;Protein EMSY-LIKE 4 {ECO:0000303|PubMed:21830950}	ENT;PF03735.17	1	1	1
OG02140	61	AB42G_ARATH;ABC transporter G family member 42	AAA_21;PF13304.9^ABC2_membrane_7;PF19055.3^ABC2_membrane;PF01061.27^ABC_tran;PF00005.30^PDR_assoc;PF08370.14^AAA_16;PF13191.9^RsgA_GTPase;PF03193.19^ABC_trans_N;PF14510.9^AAA_25;PF13481.9^ABC2_membrane_3;PF12698.10	6	7	5
OG02141	61	CSLG1_ARATH;Cellulose synthase-like protein G1	Cellulose_synt;PF03552.17^Glyco_trans_2_3;PF13632.9	3	3	3
OG02142	61	RAA1D_ARATH;Ras-related protein RABA1d	Roc;PF08477.16^Arf;PF00025.24^Ras;PF00071.25	2	2	3
OG02143	61	ETR1_BRAOL;Ethylene receptor 1	HisKA;PF00512.28^GAF;PF01590.29^HATPase_c;PF02518.29^Response_reg;PF00072.27	2	2	4
OG02144	61	UAF30_SCHPO;Upstream activation factor subunit spp27	SWIB;PF02201.21^DEK_C;PF08766.14	1	1	3
OG02145	61	WNK1_ORYSJ;Probable serine/threonine-protein kinase WNK1	Pkinase;PF00069.28^PK_Tyr_Ser-Thr;PF07714.20	1	1	3
OG02146	61	MSRB6_ARATH;Peptide methionine sulfoxide reductase B6	SelR;PF01641.21	2	2	5
OG02147	61	NA	Abhydrolase_1;PF00561.23^Abhydrolase_6;PF12697.10^Hydrolase_4;PF12146.11	3	3	5
OG02148	61	ATXR5_RICCO;Probable Histone-lysine N-methyltransferase ATXR5	PHD;PF00628.32	2	3	3
OG02149	61	MDHC_MEDSA;Malate dehydrogenase cytoplasmic	Ldh_1_N;PF00056.26^Ldh_1_C;PF02866.21	2	2	2
OG02150	61	NEC2_NESMA;Ferritin-like catalase Nec2 {ECO:0000303|PubMed:35074876}	Ferritin_2;PF13668.9	4	5	6
OG02151	61	SUVH9_ARATH;Histone-lysine N-methyltransferase family member SUVH9	SAD_SRA;PF02182.20^Pre-SET;PF05033.19^SET;PF00856.31	2	2	4
OG02152	61	NA	NA	2	2	3
OG02153	61	CFAT_PETHY;Coniferyl alcohol acyltransferase {ECO:0000303|PubMed:17241449}	Transferase;PF02458.18	2	5	5
OG02154	61	RD19A_ARATH;Cysteine protease RD19A {ECO:0000305}	Inhibitor_I29;PF08246.15^Peptidase_C1;PF00112.26	2	2	2
OG02155	61	MSI1H_RAT;RNA-binding protein Musashi homolog 1	RRM_1;PF00076.25^RRM_7;PF16367.8	2	2	3
OG02156	61	TAD2A_ARATH;Transcriptional adapter ADA2a	Myb_DNA-binding;PF00249.34^ZZ;PF00569.20	2	2	4
OG02157	61	FB253_ARATH;F-box protein At5g07610	F-box;PF00646.36	1	1	3
OG02158	61	ERGI3_XENTR;Endoplasmic reticulum-Golgi intermediate compartment protein 3	COPIIcoated_ERV;PF07970.15^ERGIC_N;PF13850.9	2	3	4
OG02159	61	SMD3_DROME;Small nuclear ribonucleoprotein Sm D3	LSM;PF01423.25	5	5	5
OG02160	61	PER63_ARATH;Peroxidase 63	peroxidase;PF00141.26	2	2	2
OG02161	61	VCL22_ARATH;Vicilin-like seed storage protein At2g28490	Cupin_1;PF00190.25^Cupin_2;PF07883.14	1	1	2
OG02162	61	P2B12_ARATH;Putative F-box protein PP2-B12	PP2;PF14299.9	2	2	0
OG02163	61	VQ25_ARATH;VQ motif-containing protein 25 {ECO:0000303|PubMed:22535423}	VQ;PF05678.17	0	2	3
OG02164	61	PBL21_ARATH;Probable serine/threonine-protein kinase PBL21 {ECO:0000305}	PK_Tyr_Ser-Thr;PF07714.20^Pkinase;PF00069.28	2	2	4
OG02165	61	EREX_ARATH;PX domain-containing protein EREX {ECO:0000305}	PX;PF00787.27	2	2	3
OG02166	61	PME67_ARATH;Probable pectinesterase 67	Pectinesterase;PF01095.22	2	3	5
OG02168	61	NA	rve;PF00665.29	0	1	0
OG02169	61	FB181_ARATH;Putative F-box protein At3g23950	F-box;PF00646.36	0	4	6
OG02171	61	RGA1_SOLBU;Putative disease resistance protein RGA1	LRR_4;PF12799.10^LRR_8;PF13855.9^NB-ARC;PF00931.25^Rx_N;PF18052.4	33	5	22
OG02174	60	NA	PUB;PF09409.13^UBA;PF00627.34	2	2	3
OG02175	60	FBK22_ARATH;F-box/kelch-repeat protein At1g55270	Kelch_1;PF01344.28^Kelch_6;PF13964.9^Kelch_4;PF13418.9^Kelch_2;PF07646.18^Kelch_3;PF13415.9	2	2	3
OG02176	60	ACCH4_ARATH;1-aminocyclopropane-1-carboxylate oxidase homolog 4	NA	2	2	4
OG02177	60	UEV1C_ARATH;Ubiquitin-conjugating enzyme E2 variant 1C	UQ_con;PF00179.29	2	2	3
OG02178	60	SC16B_ARATH;Protein transport protein SEC16B homolog {ECO:0000305}	Sec16_C;PF12931.10^Sec16;PF12932.10	1	1	5
OG02179	60	UBC13_CAEEL;Ubiquitin-conjugating enzyme E2 13 {ECO:0000312|WormBase:Y54G2A.31}	UQ_con;PF00179.29	2	2	3
OG02180	60	BH003_ORYSJ;Transcription factor BHLH3 {ECO:0000305}	HLH;PF00010.29	2	2	4
OG02181	60	ORTH5_ARATH;E3 ubiquitin-protein ligase ORTHRUS 5	zf-C3HC4;PF00097.28^zf-C3HC4_3;PF13920.9^zf-C3HC4_2;PF13923.9^zf-RING_UBOX;PF13445.9^zf-RING_2;PF13639.9^SAD_SRA;PF02182.20^zf-C3HC4_4;PF15227.9^zf-RING_5;PF14634.9	2	3	4
OG02182	60	NPR4_ORYSJ;Ankyrin repeat-containing protein NPR4 {ECO:0000305}	Ank_5;PF13857.9^Ank;PF00023.33^Ank_3;PF13606.9^Ank_4;PF13637.9^Ank_2;PF12796.10^PGG;PF13962.9	2	2	3
OG02183	60	G6PD4_ARATH;Inactive glucose-6-phosphate 1-dehydrogenase 4 chloroplastic {ECO:0000305}	G6PD_C;PF02781.19^G6PD_N;PF00479.25	2	2	4
OG02184	60	GTE8_ARATH;Transcription factor GTE8	Bromodomain;PF00439.28^BET;PF17035.8	2	3	2
OG02185	60	NET2D_ARATH;Protein NETWORKED 2D {ECO:0000303|PubMed:22840520}	KIP1;PF07765.15	1	1	2
OG02186	60	GASAE_ARATH;Gibberellin-regulated protein 14	GASA;PF02704.17	2	2	2
OG02187	60	HOX14_ORYSJ;Homeobox-leucine zipper protein HOX14	Homeodomain;PF00046.32	1	1	1
OG02188	60	LOVG_DROME;Esterase CG5412	FSH1;PF03959.16	2	2	2
OG02189	60	HDG11_ARATH;Homeobox-leucine zipper protein HDG11 {ECO:0000305}	START;PF01852.22^Homeodomain;PF00046.32	2	3	3
OG02190	60	ASNS_TRIVS;Asparagine synthetase [glutamine-hydrolyzing]	Asn_synthase;PF00733.24^GATase_7;PF13537.9^GATase_6;PF13522.9^DUF3700;PF12481.11	2	3	4
OG02191	60	NA	DUF1645;PF07816.14	1	1	2
OG02192	60	NAC54_ARATH;Protein CUP-SHAPED COTYLEDON 1	NAM;PF02365.18	1	1	2
OG02193	60	Y8359_ORYSJ;Uncharacterized protein Os08g0359500	CS;PF04969.19	2	2	4
OG02194	60	C86A1_ARATH;Cytochrome P450 86A1	p450;PF00067.25	2	2	4
OG02195	60	VPS4_ARATH;Protein SUPPRESSOR OF K(+) TRANSPORT GROWTH DEFECT 1 {ECO:0000303|PubMed:17468262}	MIT;PF04212.21^AAA;PF00004.32^Vps4_C;PF09336.13	1	1	2
OG02196	60	U80A2_ARATH;Sterol 3-beta-glucosyltransferase UGT80A2	Glyco_transf_28;PF03033.23	1	2	2
OG02197	60	KAT1_PETHY;3-ketoacyl CoA thiolase 1 peroxisomal {ECO:0000303|PubMed:19659733}	Thiolase_N;PF00108.26^Thiolase_C;PF02803.21	2	2	3
OG02198	60	JMJ18_ARATH;Lysine-specific demethylase JMJ18 {ECO:0000303|PubMed:18713399}	JmjC;PF02373.25^JmjN;PF02375.20^zf-C5HC2;PF02928.19^FYRC;PF05965.17^FYRN;PF05964.17	2	2	4
OG02199	60	MTM1_ARATH;Mitochondrial carrier protein MTM1	Mito_carr;PF00153.30	2	2	4
OG02200	60	NA	HIG_1_N;PF04588.16	3	2	4
OG02201	60	TRXH1_ORYSJ;Thioredoxin H1	Thioredoxin_8;PF13905.9^Thioredoxin;PF00085.23^Thioredoxin_2;PF13098.9^TraF;PF13728.9^OST3_OST6;PF04756.16^Redoxin;PF08534.13^Thioredoxin_9;PF14595.9^Thioredoxin_7;PF13899.9^AhpC-TSA;PF00578.24^DIM1;PF02966.19	2	4	2
OG02202	60	SOFL4_ARATH;Protein SOB FIVE-LIKE 4 {ECO:0000303|PubMed:29467189}	NA	1	4	3
OG02203	60	EF104_ARATH;Ethylene-responsive transcription factor ERF104	AP2;PF00847.23	1	1	1
OG02204	60	ITPK1_MAIZE;Inositol-tetrakisphosphate 1-kinase 1 {ECO:0000303|PubMed:12586875}	Ins134_P3_kin;PF05770.14^Ins134_P3_kin_N;PF17927.4	2	2	2
OG02205	60	CYPR4_CYNCA;Protein CYPRO4	VID27;PF08553.13	2	2	4
OG02206	60	GLR31_ARATH;Glutamate receptor 3.1	Lig_chan;PF00060.29^ANF_receptor;PF01094.31^Peripla_BP_6;PF13458.9^SBP_bac_3;PF00497.23^Lig_chan-Glu_bd;PF10613.12	2	2	4
OG02207	60	VA722_ARATH;Vesicle-associated membrane protein 722 {ECO:0000303|PubMed:11115874}	Crescentin;PF19220.3	2	1	1
OG02208	60	ERF82_ARATH;Ethylene-responsive transcription factor 3	AP2;PF00847.23	1	1	2
OG02209	60	NAC68_ORYSJ;NAC domain-containing protein 68 {ECO:0000303|PubMed:15029955}	NAM;PF02365.18	1	1	2
OG02210	60	YJCK_BACSU;Putative [ribosomal protein S5]-alanine N-acetyltransferase {ECO:0000250|UniProtKB:P0A948}	Acetyltransf_3;PF13302.10^Acetyltransf_1;PF00583.28^Acetyltransf_8;PF13523.9^Acetyltransf_4;PF13420.10	1	3	5
OG02211	60	UPL5_ARATH;E3 ubiquitin-protein ligase UPL5	HECT;PF00632.28^ubiquitin;PF00240.26^Rad60-SLD;PF11976.11	1	1	2
OG02212	60	ACOHC_CUCMC;Aconitate hydratase	Aconitase;PF00330.23^Aconitase_C;PF00694.22	2	3	3
OG02213	60	HEM1_ACAM1;Glutamyl-tRNA reductase {ECO:0000255|HAMAP-Rule:MF_00087}	GlutR_dimer;PF00745.23^Shikimate_DH;PF01488.23^GlutR_N;PF05201.18^F420_oxidored;PF03807.20	2	2	4
OG02214	60	TRF1A_ARATH;TNF receptor-associated factor homolog 1a {ECO:0000305}	MATH;PF00917.29	1	1	1
OG02215	60	TCTP_WHEAT;Translationally-controlled tumor protein homolog	TCTP;PF00838.20	2	2	5
OG02216	60	ARID1_ARATH;AT-rich interactive domain-containing protein 1	NA	2	2	4
OG02217	60	1A112_ARATH;Probable aminotransferase ACS12	Aminotran_1_2;PF00155.24	2	2	4
OG02218	60	PLDZ2_ARATH;Phospholipase D zeta 2 {ECO:0000303|PubMed:11891260}	PLDc;PF00614.25^PLDc_2;PF13091.9	2	1	3
OG02219	60	SURE_SULDN;5'-nucleotidase SurE {ECO:0000255|HAMAP-Rule:MF_00060}	SurE;PF01975.20	1	1	2
OG02220	60	SRP_VITRI;Stress-related protein	REF;PF05755.15	3	1	4
OG02221	60	DNJ21_ARATH;DnaJ protein ERDJ2A	Sec63;PF02889.19^DnaJ;PF00226.34	2	2	4
OG02222	60	PBF_MAIZE;Dof zinc finger protein PBF	zf-Dof;PF02701.18	2	4	4
OG02223	60	AGL80_ARATH;Agamous-like MADS-box protein AGL80	SRF-TF;PF00319.21	2	2	2
OG02224	60	NECP1_PONAB;Adaptin ear-binding coat-associated protein 1	DUF1681;PF07933.17^Ubie_methyltran;PF01209.21^Methyltransf_25;PF13649.9^Methyltransf_11;PF08241.15^Methyltransf_12;PF08242.15^MTS;PF05175.17^Methyltransf_31;PF13847.9^Methyltransf_23;PF13489.9	4	4	3
OG02225	60	C7342_ORYSJ;Cytochrome P450 734A2	p450;PF00067.25	2	2	5
OG02226	60	AL1B1_HUMAN;Aldehyde dehydrogenase X mitochondrial	Aldedh;PF00171.25	2	2	3
OG02227	60	Y4539_ARATH;Receptor-like serine/threonine-protein kinase At4g25390	Pkinase;PF00069.28^PK_Tyr_Ser-Thr;PF07714.20	2	2	4
OG02228	60	PIOX_CAPAN;Alpha-dioxygenase 1 {ECO:0000303|PubMed:11807143}	An_peroxidase;PF03098.18	2	2	3
OG02229	60	SRK2I_ARATH;Serine/threonine-protein kinase SRK2I	PK_Tyr_Ser-Thr;PF07714.20^Pkinase;PF00069.28	3	4	4
OG02230	60	PHO34_ARATH;Universal stress protein PHOS34 {ECO:0000303|PubMed:12644671}	Usp;PF00582.29	2	2	5
OG02231	60	SCP10_ARATH;Serine carboxypeptidase-like 10	Peptidase_S10;PF00450.25	2	4	9
OG02232	60	POQ_ARATH;Protein PAL OF QUIRKY {ECO:0000303|PubMed:24173806}	PB1;PF00564.27	1	1	2
[truncated: 14,881 more rows]

## Sheet: Table S3
Table S3. Orthogroups specific to the Coffea-lineage
#NA indicates no significant match in the database
Orthogroup ID	UniProt.Hit	Pfam.Hit	Gene count
			C. canephora	C. eugenioides	C. arabica
OG00718	TF26_SCHPO;Transposon Tf2-6 polyprotein	Retrotrans_gag;PF03732.20^Ty3_capsid;PF19259.2^RVP_2;PF08284.14	2	50	45
OG00906	TM2NV_SOLLC;ToMV resistant protein Tm-2 netted virescent {ECO:0000303|Ref.1 ECO:0000303|Ref.2}	NB-ARC;PF00931.25^NB-LRR;PF12061.11	17	37	35
OG01364	NA#	DDE_Tnp_4;PF13359.9^Plant_tran;PF04827.17	2	26	47
OG01713	R13L1_ARATH;Putative disease resistance RPP13-like protein 1	LRR_4;PF12799.10^LRR_8;PF13855.9^NB-ARC;PF00931.25^Rx_N;PF18052.4^AAA_16;PF13191.9	31	27	10
OG01782	R1B16_SOLDE;Putative late blight resistance protein homolog R1B-16	NB-LRR;PF12061.11^NB-ARC;PF00931.25^AAA_16;PF13191.9	21	21	25
OG04114	NA	Plant_tran;PF04827.17^DDE_Tnp_4;PF13359.9^DDE_Tnp_1;PF01609.24	1	17	26
OG05908	NA	NA	4	7	26
OG06575	RFCS_AERPE;Replication factor C small subunit {ECO:0000255|HAMAP-Rule:MF_01509}	Myb_DNA-bind_3;PF12776.10	3	10	22
OG09049	IF2_NOSS1;Translation initiation factor IF-2 {ECO:0000255|HAMAP-Rule:MF_00100}	GTP_EFTU;PF00009.30^MIR;PF02815.22^MMR_HSR1;PF01926.26	23	2	5
OG12445	NA	NA	1	18	6
OG12446	CYT4_ARATH;Cysteine proteinase inhibitor 4	SQAPI;PF16845.8^Cystatin;PF00031.24	5	7	13
OG13281	GTOMC_ARATH;Tocopherol O-methyltransferase chloroplastic	CMAS;PF02353.23^Methyltransf_25;PF13649.9^Methyltransf_11;PF08241.15^Methyltransf_31;PF13847.9^Methyltransf_23;PF13489.9^Methyltransf_12;PF08242.15^Ubie_methyltran;PF01209.21	5	9	9
OG13282	NA	LRR_8;PF13855.9^LRR_4;PF12799.10^LRR_1;PF00560.36^LRR_6;PF13516.9^LRRNT_2;PF08263.15	10	12	1
OG13551	G2OX2_ARATH;Gibberellin 2-beta-dioxygenase 2	2OG-FeII_Oxy;PF03171.23^DIOX_N;PF14226.9	5	13	4
OG13783	SRP68_DROME;Signal recognition particle subunit SRP68	SRP68;PF16969.8	1	19	1
OG13785	ASPG1_ARATH;Protein ASPARTIC PROTEASE IN GUARD CELL 1	TAXi_N;PF14543.9^Asp;PF00026.26^TAXi_C;PF14541.9	5	5	11
OG14146	RPP13_ARATH;Disease resistance protein RPP13	NB-LRR;PF12061.11^NB-ARC;PF00931.25^AAA_16;PF13191.9	2	8	9
OG14154	NA	SQAPI;PF16845.8	1	8	10
OG14290	NA	Rep_fac-A_C;PF08646.13	1	2	15
OG14465	PYL8_ARATH;Abscisic acid receptor PYL8 {ECO:0000303|PubMed:19407142 ECO:0000303|PubMed:19624469}	Polyketide_cyc2;PF10604.12^Polyketide_cyc;PF03364.23	2	10	5
OG14466	CXE2_ARATH;Probable carboxylesterase 2	Abhydrolase_3;PF07859.16^Ldh_1_N;PF00056.26^BD-FAE;PF20434.1^COesterase;PF00135.31	15	1	1
OG14815	UNI_ARATH;Disease resistance protein UNI {ECO:0000305}	NB-ARC;PF00931.25^NACHT;PF05729.15	1	12	2
OG14817	NA	NA	2	8	5
OG14997	PUN1_CAPCH;Acyltransferase Pun1 {ECO:0000305}	Transferase;PF02458.18	1	8	5
OG15001	NA	Ank_4;PF13637.9^Ank_5;PF13857.9^Ank_2;PF12796.10^Ank_3;PF13606.9^Ank;PF00023.33^PGG;PF13962.9	3	4	7
OG15002	FB253_ARATH;F-box protein At5g07610	NA	2	4	8
OG15006	5MAT2_SALSN;Pelargonidin 3-O-(6-caffeoylglucoside) 5-O-(6-O-malonylglucoside) 4'''-malonyltransferase	Transferase;PF02458.18	4	5	5
OG15218	MES10_ARATH;Methylesterase 10 {ECO:0000303|PubMed:18467465}	Abhydrolase_1;PF00561.23^Hydrolase_4;PF12146.11^Abhydrolase_6;PF12697.10	3	4	6
OG15219	C7A15_ARATH;Cytochrome P450 72A15	p450;PF00067.25^Cyclin_C;PF02984.22	8	2	3
OG15220	NA	NA	4	3	6
OG15225	GH34_ORYSJ;Probable indole-3-acetic acid-amido synthetase GH3.4	GH3;PF03321.16	2	9	2
OG15421	NA	NA	2	3	7
OG15424	DIR11_ARATH;Dirigent protein 11	Dirigent;PF03018.17	1	1	10
OG15425	R1A_SOLDE;Late blight resistance protein R1-A	NB-LRR;PF12061.11^NB-ARC;PF00931.25	1	4	7
OG15431	NA	NA	4	6	2
OG15432	BGL17_ARATH;Beta-glucosidase 17 {ECO:0000303|PubMed:15604686}	Glyco_hydro_1;PF00232.21	4	4	4
OG15655	C7A75_MAELA;Cytochrome P450 716A75 {ECO:0000303|PubMed:25578277}	p450;PF00067.25	4	1	6
OG15661	RGA1_SOLBU;Putative disease resistance protein RGA1	LRR_8;PF13855.9^LRR_4;PF12799.10	2	3	6
OG15664	TCEB1_TULGE;Tuliposide B-converting enzyme 1 amyloplastic {ECO:0000303|PubMed:25997073}	Abhydrolase_3;PF07859.16^BD-FAE;PF20434.1	6	3	2
OG15680	CB60C_ARATH;Calmodulin-binding protein 60 C {ECO:0000303|PubMed:11782485}	Calmodulin_bind;PF07887.14^Calmod_bind_M;PF20451.1	3	3	5
OG15926	C71DB_LOTJA;Cytochrome P450 71D11	p450;PF00067.25	5	3	2
OG15937	NA	Plant_tran;PF04827.17^DDE_Tnp_4;PF13359.9	1	1	8
OG15942	R1A4_SOLDE;Putative late blight resistance protein homolog R1A-4	NB-ARC;PF00931.25	1	2	7
OG15946	R1B19_SOLDE;Putative late blight resistance protein homolog R1B-19	NB-LRR;PF12061.11^NB-ARC;PF00931.25	3	2	5
OG15949	FAR1_ARATH;Protein FAR-RED IMPAIRED RESPONSE 1	MULE;PF10551.12^FAR1;PF03101.18	1	3	6
OG15953	6PGL5_ARATH;Probable 6-phosphogluconolactonase 5 {ECO:0000305}	Glucosamine_iso;PF01182.23	4	2	4
OG15956	NA	Ank_2;PF12796.10^Ank_4;PF13637.9^Ank_3;PF13606.9^Ank_5;PF13857.9^PGG;PF13962.9	3	2	5
OG15970	GL812_ORYSJ;Germin-like protein 8-12	Cupin_1;PF00190.25	2	2	6
OG15971	MOMT_CATRO;Myricetin O-methyltransferase	Methyltransf_2;PF00891.21^Dimerisation;PF08100.14	2	6	2
OG15974	MFS_MENPI;(+)-menthofuran synthase	p450;PF00067.25^RT_RNaseH;PF17917.4	2	6	2
OG16251	SAPK6_ORYSJ;Serine/threonine-protein kinase SAPK6	CRM1_repeat_3;PF18787.4^PK_Tyr_Ser-Thr;PF07714.20^Pkinase;PF00069.28	2	1	6
OG16253	NA	Dirigent;PF03018.17	7	1	1
OG16256	NA	DUF1668;PF07893.16	2	3	4
OG16261	NA	RVT_3;PF13456.9^zf-RVT;PF13966.9	1	6	2
OG16263	R1B8_SOLDE;Putative late blight resistance protein homolog R1B-8	NB-ARC;PF00931.25^NB-LRR;PF12061.11^AAA_16;PF13191.9	1	5	3
OG16265	NA	NA	5	2	2
OG16267	NA	NA	4	2	3
OG16269	Y3471_ARATH;Putative receptor-like protein kinase At3g47110	LRR_4;PF12799.10^LRR_8;PF13855.9^LRR_1;PF00560.36^PK_Tyr_Ser-Thr;PF07714.20^Pkinase;PF00069.28^LRRNT_2;PF08263.15	4	2	3
OG16273	R1B8_SOLDE;Putative late blight resistance protein homolog R1B-8	NB-ARC;PF00931.25^NB-LRR;PF12061.11^Terpene_syn_C_2;PF19086.3^Terpene_synth_C;PF03936.19	1	2	6
OG16282	CRK5_ARATH;Cysteine-rich receptor-like protein kinase 5	Stress-antifung;PF01657.20	1	7	1
OG16287	NA	NA	3	5	1
OG16288	DRL40_ARATH;Probable disease resistance protein At5g63020	LRR_8;PF13855.9^Rx_N;PF18052.4^LRR_4;PF12799.10	2	2	5
OG16290	DNAT1_ARATH;14-dihydroxy-2-naphthoyl-CoA thioesterase 1 {ECO:0000303|PubMed:22372525}	4HBT;PF03061.25	1	2	6
OG16672	HCT1_ACTRA;Hydroxycinnamoyl-CoA:piscidic acid hydroxycinnamoyltransferase {ECO:0000303|PubMed:31069522}	Transferase;PF02458.18	1	2	5
OG16677	R1A3_SOLDE;Putative late blight resistance protein homolog R1A-3	NB-ARC;PF00931.25	1	3	4
OG16688	PABP4_ARATH;Polyadenylate-binding protein 4	RRM_1;PF00076.25	1	2	5
OG16691	NA	NA	2	3	3
OG16693	NA	DnaJ_C;PF01556.21	1	5	2
OG16702	WTR24_ARATH;WAT1-related protein At3g30340	EamA;PF00892.23	3	2	3
OG16708	BBE8_ARATH;Berberine bridge enzyme-like 8 {ECO:0000303|PubMed:26037923}	FAD_binding_4;PF01565.26	2	1	5
OG16713	R1B19_SOLDE;Putative late blight resistance protein homolog R1B-19	NB-LRR;PF12061.11^NB-ARC;PF00931.25^AAA_22;PF13401.9	2	1	5
OG16731	NA	NA	3	2	3
OG16738	XA21_ORYSI;Receptor kinase-like protein Xa21 {ECO:0000303|Ref.1}	LRR_8;PF13855.9^LRR_4;PF12799.10^LRR_1;PF00560.36^Pkinase;PF00069.28^PK_Tyr_Ser-Thr;PF07714.20	2	4	2
OG16739	EPS1_ARATH;Protein ENHANCED PSEUDOMONAS SUSCEPTIBILITY 1 {ECO:0000303|PubMed:19036031}	Transferase;PF02458.18	3	3	2
OG16742	R1A4_SOLDE;Putative late blight resistance protein homolog R1A-4	NB-LRR;PF12061.11^NB-ARC;PF00931.25	5	1	2
OG16743	PDR1_PETAX;Pleiotropic drug resistance protein 1 {ECO:0000303|PubMed:22398443}	ABC2_membrane;PF01061.27^ABC_tran;PF00005.30^ABC2_membrane_3;PF12698.10	5	2	1
OG16745	NA	SQAPI;PF16845.8^Cystatin;PF00031.24	1	6	1
OG16746	KRP4_ORYSJ;Cyclin-dependent kinase inhibitor 4	CDI;PF02234.22	2	2	4
OG16757	SOT10_ARATH;Cytosolic sulfotransferase 10	Sulfotransfer_3;PF13469.9^Sulfotransfer_1;PF00685.30	3	1	4
OG17250	NA	Dirigent;PF03018.17	1	4	2
OG17253	R1B17_SOLDE;Putative late blight resistance protein homolog R1B-17	NB-ARC;PF00931.25^NB-LRR;PF12061.11	1	2	4
OG17256	NA	NA	1	1	5
OG17258	NA	PMD;PF10536.12	1	1	5
OG17262	U7A16_PYRCO;UDP-glycosyltransferase 71A16 {ECO:0000303|Ref.1}	UDPGT;PF00201.21	2	3	2
OG17266	ISPG_ARATH;4-hydroxy-3-methylbut-2-en-1-yl diphosphate synthase (ferredoxin) chloroplastic	DUF819;PF05684.15	2	3	2
OG17267	NA	LRR_8;PF13855.9^LRR_4;PF12799.10	3	3	1
OG17268	NA	NA	2	1	4
OG17269	AOP1V_ARATH;Probable 2-oxoglutarate-dependent dioxygenase AOP1	DIOX_N;PF14226.9	1	2	4
OG17271	ECI2_ARATH;Enoyl-CoA delta isomerase 2 peroxisomal {ECO:0000305}	ECH_1;PF00378.23	2	1	4
OG17283	FBD15_ARATH;FBD-associated F-box protein At5g27750	FBD;PF08387.13	1	1	5
OG17289	RQL4A_ARATH;ATP-dependent DNA helicase Q-like 4A	Clathrin;PF00637.23	1	3	3
OG17299	SCL5_ARATH;Scarecrow-like protein 5	GRAS;PF03514.17	1	3	3
OG17300	C81D1_ARATH;Cytochrome P450 81D1	p450;PF00067.25	2	4	1
OG17303	SSL13_ARATH;Protein STRICTOSIDINE SYNTHASE-LIKE 13 {ECO:0000303|PubMed:10777701}	Str_synth;PF03088.19	1	3	3
OG17305	NA	Ank_5;PF13857.9^Ank_4;PF13637.9^Ank_3;PF13606.9^Ank;PF00023.33^Ank_2;PF12796.10^PGG;PF13962.9	2	3	2
OG17306	NA	Ank_5;PF13857.9^Ank_3;PF13606.9^Ank;PF00023.33^Ank_4;PF13637.9^Ank_2;PF12796.10^PGG;PF13962.9	1	2	4
OG17307	FRBB_BLOB1;Highly reducing polyketide synthase frbB {ECO:0000303|PubMed:27660098}	ADH_zinc_N_2;PF13602.9^ADH_zinc_N;PF00107.29	1	4	2
OG17308	PLY20_ARATH;Probable pectate lyase 20	Beta_helix;PF13229.9^Pectate_lyase_4;PF00544.22	2	3	2
OG17309	R1B23_SOLDE;Putative late blight resistance protein homolog R1B-23	NB-LRR;PF12061.11^NB-ARC;PF00931.25	2	3	2
OG17311	NA	zf-RVT;PF13966.9	1	1	5
OG17320	IT2_PSOTE;Trypsin inhibitor 2	Kunitz_legume;PF00197.21	4	2	1
OG17321	TMN5_ARATH;Transmembrane 9 superfamily member 5 {ECO:0000305}	EMP70;PF02990.19	3	1	3
OG17323	U76F2_ARATH;UDP-glycosyltransferase 76F2	UDPGT;PF00201.21	4	1	2
OG17325	Y2923_ARATH;Putative leucine-rich repeat receptor-like serine/threonine-protein kinase At2g19230	LRR_8;PF13855.9^LRR_4;PF12799.10^PK_Tyr_Ser-Thr;PF07714.20^Pkinase;PF00069.28^LRR_1;PF00560.36	1	3	3
OG17326	NA	Ank_5;PF13857.9^Ank_3;PF13606.9^Ank;PF00023.33^Ank_2;PF12796.10^Ank_4;PF13637.9^PGG;PF13962.9	2	2	3
OG17327	CHIT_PUNGR;Acidic endochitinase Pun g 14 amyloplastic {ECO:0000305}	Glyco_hydro_18;PF00704.31	2	1	4
OG17330	R13L2_ARATH;Putative disease resistance RPP13-like protein 2	NB-LRR;PF12061.11^Rx_N;PF18052.4^NB-ARC;PF00931.25^AAA_14;PF13173.9	1	4	2
OG17331	R1A10_SOLDE;Putative late blight resistance protein homolog R1A-10	NB-LRR;PF12061.11^NB-ARC;PF00931.25^Rx_N;PF18052.4	1	3	3
OG17332	NA	NA	1	3	3
OG17334	NA	DUF3444;PF11926.11	1	2	4
OG17338	NQR2_ORYSJ;Probable NADPH:quinone oxidoreductase 2	FMN_red;PF03358.18	2	3	2
OG17339	BNM2A_BRANA;BURP domain-containing protein BNM2A {ECO:0000303|PubMed:19714473}	BURP;PF03181.18	1	3	3
OG17340	NA	NA	1	1	5
OG17344	C93A3_SOYBN;Cytochrome P450 93A3	p450;PF00067.25	3	2	2
OG17350	NA	NA	1	5	1
OG17355	SBT36_ARATH;Subtilisin-like protease SBT3.6 {ECO:0000303|PubMed:16193095}	Inhibitor_I9;PF05922.19^Peptidase_S8;PF00082.25	2	4	1
OG17960	NA	Dirigent;PF03018.17	1	2	3
OG17967	NA	C1_2;PF03107.19^C1_1;PF00130.25	1	2	3
OG17969	RGA1_SOLBU;Putative disease resistance protein RGA1	NB-ARC;PF00931.25^Rx_N;PF18052.4	1	1	4
OG17974	FDL2_ARATH;F-box/FBD/LRR-repeat protein At1g13780	FBD;PF08387.13^F-box;PF00646.36	1	1	4
OG17975	FDL10_ARATH;F-box/FBD/LRR-repeat protein At1g78750	FBD;PF08387.13^F-box;PF00646.36	1	1	4
OG17984	NA	Organ_specific;PF10950.11	2	2	2
OG17988	YPTM1_MAIZE;GTP-binding protein YPTM1	Ras;PF00071.25^Roc;PF08477.16	1	1	4
OG17989	NA	NA	1	2	3
OG18008	GCK3_CAEEL;Germinal center kinase 3 {ECO:0000303|PubMed:15684092}	PK_Tyr_Ser-Thr;PF07714.20^Pkinase;PF00069.28^PDS5;PF20168.1	2	3	1
OG18011	FTSH1_ORYSJ;ATP-dependent zinc metalloprotease FTSH 1 chloroplastic	NA	2	3	1
OG18012	WR52W_ARATH;Disease resistance protein RRS1 {ECO:0000303|PubMed:19519800}	NB-ARC;PF00931.25	1	2	3
OG18015	R1A4_SOLDE;Putative late blight resistance protein homolog R1A-4	NB-LRR;PF12061.11^NB-ARC;PF00931.25	2	1	3
OG18027	Y3471_ARATH;Putative receptor-like protein kinase At3g47110	LRR_8;PF13855.9^LRR_4;PF12799.10^LRR_1;PF00560.36^LRR_6;PF13516.9^LRRNT_2;PF08263.15^Pkinase;PF00069.28^PK_Tyr_Ser-Thr;PF07714.20	1	3	2
OG18032	NA	Organ_specific;PF10950.11	2	3	1
OG18034	DNLI4_ARATH;DNA ligase 4	NA	1	2	3
OG18036	TIRC_ORYSJ;Transport inhibitor response 1-like protein Os11g0515500	NA	2	2	2
OG18040	DRL40_ARATH;Probable disease resistance protein At5g63020	NB-ARC;PF00931.25^LRR_4;PF12799.10^LRR_8;PF13855.9	1	1	4
OG18044	CPR1_ARATH;F-box protein CPR1	FBA_1;PF07734.16^F-box;PF00646.36^F-box-like;PF12937.10	1	2	3
OG18045	NFYB8_ORYSJ;Nuclear transcription factor Y subunit B-8 {ECO:0000305}	CBFD_NFYB_HMF;PF00808.26	1	1	4
OG18046	Y2165_ARATH;Probable LRR receptor-like serine/threonine-protein kinase At2g16250	Pkinase;PF00069.28^PK_Tyr_Ser-Thr;PF07714.20	2	1	3
OG18051	ASP_THECC;21 kDa seed protein	Kunitz_legume;PF00197.21	1	3	2
OG18054	CPR1_ARATH;F-box protein CPR1	F-box-like;PF12937.10^F-box;PF00646.36	1	3	2
OG18058	MIK2_ARATH;MDIS1-interacting receptor like kinase 2 {ECO:0000303|PubMed:26863186}	LRR_4;PF12799.10^LRR_8;PF13855.9^LRR_1;PF00560.36^PK_Tyr_Ser-Thr;PF07714.20^Pkinase;PF00069.28^LRRNT_2;PF08263.15	1	1	4
OG18064	SSL3_ARATH;Protein STRICTOSIDINE SYNTHASE-LIKE 3 {ECO:0000303|PubMed:10777701}	Str_synth;PF03088.19	3	1	2
OG18068	NA	NA	2	1	3
OG18075	DRL13_ARATH;Putative disease resistance protein At1g59780	NB-ARC;PF00931.25	1	2	3
OG18077	MCA9_ARATH;Metacaspase-9	Peptidase_C14;PF00656.25	1	2	3
OG18078	GAOX3_ARATH;Gibberellin 20 oxidase 3 {ECO:0000305|PubMed:7630935}	2OG-FeII_Oxy;PF03171.23	1	2	3
OG18081	RECA3_ARATH;DNA repair protein recA homolog 3 mitochondrial	RecA;PF00154.24^PK_Tyr_Ser-Thr;PF07714.20	3	2	1
OG18813	NA	NA	1	3	1
OG18817	R1B23_SOLDE;Putative late blight resistance protein homolog R1B-23	NB-LRR;PF12061.11^NB-ARC;PF00931.25^Rx_N;PF18052.4	1	1	3
OG18818	DRL12_ARATH;Probable disease resistance protein At1g59620	NB-LRR;PF12061.11^NB-ARC;PF00931.25	1	2	2
OG18820	AGDP1_ARATH;Protein AGENET DOMAIN (AGD)-CONTAINING P1 {ECO:0000303|PubMed:30382101}	Agenet;PF05641.15	1	1	3
OG18822	YHKF_SCHPO;Uncharacterized RNA-binding protein C660.15	RRM_1;PF00076.25	2	1	2
OG18823	R1B14_SOLDE;Putative late blight resistance protein homolog R1B-14	NB-ARC;PF00931.25	1	2	2
OG18825	F6H1_ARATH;Feruloyl CoA ortho-hydroxylase 1 {ECO:0000303|PubMed:18547395}	2OG-FeII_Oxy;PF03171.23	2	1	2
OG18830	ARI10_ARATH;Probable E3 ubiquitin-protein ligase ARI10	IBR;PF01485.24	1	1	3
OG18831	RBRA_DICDI;Probable E3 ubiquitin-protein ligase rbrA	IBR;PF01485.24^Ariadne;PF19422.2	1	1	3
OG18832	SBT56_ARATH;Subtilisin-like protease SBT5.6 {ECO:0000303|PubMed:16193095}	Peptidase_S8;PF00082.25^fn3_6;PF17766.4^Inhibitor_I9;PF05922.19	1	1	3
OG18838	NA	NA	1	1	3
OG18839	EHD2_ARATH;EH domain-containing protein 2 {ECO:0000303|PubMed:18547399}	EHD_N;PF16880.8	1	1	3
OG18840	NA	NA	1	1	3
OG18845	LYK3_ARATH;LysM domain receptor-like kinase 3	Pkinase;PF00069.28^PK_Tyr_Ser-Thr;PF07714.20^DUF2828;PF11443.11	2	1	2
OG18847	DRL13_ARATH;Putative disease resistance protein At1g59780	NB-ARC;PF00931.25	1	2	2
OG18850	ERLL1_ARATH;pEARLI1-like lipid transfer protein 1	Hydrophob_seed;PF14547.9^LTP_2;PF14368.9	2	1	2
OG18857	R1A3_SOLDE;Putative late blight resistance protein homolog R1A-3	NB-LRR;PF12061.11^NB-ARC;PF00931.25	1	3	1
OG18858	R1B12_SOLDE;Putative late blight resistance protein homolog R1B-12	NB-LRR;PF12061.11^NB-ARC;PF00931.25^AAA_16;PF13191.9	1	2	2
OG18861	FDL7_ARATH;Putative F-box/FBD/LRR-repeat protein At1g66290	FBD;PF08387.13	1	1	3
OG18863	NA	NA	1	1	3
OG18867	NA	BURP;PF03181.18	1	2	2
OG18869	IF4A2_NICPL;Eukaryotic initiation factor 4A-2	DEAD;PF00270.32	1	1	3
OG18870	PBL3_ARATH;Probable serine/threonine-protein kinase PBL3 {ECO:0000305}	Pkinase;PF00069.28^PK_Tyr_Ser-Thr;PF07714.20	1	2	2
OG18874	R1C3_SOLDE;Putative late blight resistance protein homolog R1C-3	NB-ARC;PF00931.25^AAA_16;PF13191.9	1	2	2
OG18881	ACT_GOSHI;Actin	Actin;PF00022.22	2	2	1
OG18887	NA	NA	2	1	2
OG18890	AGD9_ARATH;Probable ADP-ribosylation factor GTPase-activating protein AGD9	NA	1	2	2
OG18891	TET19_ARATH;Tetraspanin-19	Tetraspanin;PF00335.23	2	1	2
OG18892	IDD8_ARATH;Zinc finger protein NUTCRACKER {ECO:0000303|PubMed:25829440}	NA	1	1	3
OG18894	SEC6_ARATH;Exocyst complex component SEC6 {ECO:0000303|PubMed:18492870 ECO:0000303|PubMed:35249253}	Sec6;PF06046.16	1	1	3
OG18895	CPR1_ARATH;F-box protein CPR1	F-box-like;PF12937.10^F-box;PF00646.36	1	2	2
OG18898	SOT13_ARATH;Cytosolic sulfotransferase 13	Sulfotransfer_1;PF00685.30	1	2	2
OG18905	GL22_ARATH;Germin-like protein subfamily 2 member 2	Cupin_1;PF00190.25^Cupin_2;PF07883.14	1	1	3
OG18910	PLY18_SOLLC;Probable pectate lyase P18	Pectate_lyase_4;PF00544.22	1	2	2
OG18911	THCAS_CANSA;Tetrahydrocannabinolic acid synthase {ECO:0000303|Ref.4}	BBE;PF08031.15^FAD_binding_4;PF01565.26	1	1	3
OG18913	Y1853_ARATH;Receptor-like serine/threonine-protein kinase At1g78530	LRR_4;PF12799.10^LRR_8;PF13855.9^LRR_1;PF00560.36^ABC1;PF03109.19^Pkinase;PF00069.28^PK_Tyr_Ser-Thr;PF07714.20	1	1	3
OG18915	NA	DUF247;PF03140.18	1	1	3
OG18917	ENOXC_FRAAN;2-methylene-furan-3-one reductase	NA	1	2	2
OG18920	VAT1_HUMAN;Synaptic vesicle membrane protein VAT-1 homolog	ADH_zinc_N;PF00107.29^ADH_N;PF08240.15^ADH_zinc_N_2;PF13602.9	1	2	2
OG18922	PLY4_ARATH;Probable pectate lyase 4	Pectate_lyase_4;PF00544.22	1	2	2
OG18923	NA	NA	2	1	2
OG18925	AB10B_ARATH;ABC transporter B family member 10	ABC_membrane;PF00664.26^ABC_tran;PF00005.30^SMC_N;PF02463.22^AAA_21;PF13304.9^Retrotrans_gag;PF03732.20	1	3	1
OG18927	WAKLJ_ARATH;Wall-associated receptor kinase-like 10	GUB_WAK_bind;PF13947.9^Pkinase;PF00069.28^PK_Tyr_Ser-Thr;PF07714.20	2	2	1
OG18932	SPCS1_ARATH;Signal peptidase complex subunit 1	SPC12;PF06645.16	2	2	1
OG18935	NA	NA	1	1	3
OG18942	DIR23_ARATH;Dirigent protein 23	Dirigent;PF03018.17	1	1	3
OG18943	R1C3_SOLDE;Putative late blight resistance protein homolog R1C-3	NB-ARC;PF00931.25	2	1	2
OG18944	FB133_ARATH;F-box protein At3g03040	FBD;PF08387.13	1	2	2
OG18950	MYB30_ANTMA;Myb-related protein 330	Myb_DNA-bind_6;PF13921.9^Myb_DNA-binding;PF00249.34	2	1	2
OG18951	EF101_ARATH;Ethylene-responsive transcription factor 2	AP2;PF00847.23	1	1	3
OG18952	TI17B_BOVIN;Mitochondrial import inner membrane translocase subunit Tim17-B	Tim17;PF02466.22	1	1	3
OG18953	MLP43_ARATH;MLP-like protein 43	Bet_v_1;PF00407.22	1	2	2
OG18954	Y3471_ARATH;Putative receptor-like protein kinase At3g47110	LRR_8;PF13855.9^PK_Tyr_Ser-Thr;PF07714.20^Pkinase;PF00069.28	3	1	1
OG18957	MLP28_ARATH;MLP-like protein 28	Bet_v_1;PF00407.22	1	1	3
OG18960	CHI2_COCP7;Endochitinase 2	Glyco_hydro_18;PF00704.31	1	2	2
OG18964	IDE1_ARATH;Insulin-degrading enzyme-like 1 peroxisomal	Peptidase_M16_M;PF16187.8	1	1	3
OG18967	MUC70_ARATH;Probable hexosyltransferase MUCI70 {ECO:0000305}	DUF616;PF04765.16	1	2	2
OG18969	MOMT2_SOLHA;Myricetin 7/4'-O-methyltransferase 2 {ECO:0000303|PubMed:21343428}	Dimerisation;PF08100.14^Methyltransf_2;PF00891.21	3	1	1
OG18970	XA21_ORYSI;Receptor kinase-like protein Xa21 {ECO:0000303|Ref.1}	PK_Tyr_Ser-Thr;PF07714.20^Pkinase;PF00069.28^LRR_8;PF13855.9^LRR_4;PF12799.10^ABC1;PF03109.19^APH;PF01636.26	1	2	2
OG18972	DRKB_DICDI;Probable serine/threonine-protein kinase drkB	PK_Tyr_Ser-Thr;PF07714.20^Pkinase;PF00069.28	1	2	2
OG18977	TMK4_ARATH;Receptor-like kinase TMK4 {ECO:0000303|PubMed:23613767}	LRR_8;PF13855.9^LRR_4;PF12799.10^LRR_1;PF00560.36^PK_Tyr_Ser-Thr;PF07714.20^Pkinase;PF00069.28^LRRNT_2;PF08263.15	1	2	2
OG18978	PEK14_ARATH;Proline-rich receptor-like protein kinase PERK14	PK_Tyr_Ser-Thr;PF07714.20^Pkinase;PF00069.28	1	2	2
OG18981	PP2B1_ARATH;F-box protein PP2-B1	PP2;PF14299.9	1	1	3
OG18982	DRL7_ARATH;Probable disease resistance protein At1g58390	NB-ARC;PF00931.25^Rx_N;PF18052.4	1	1	3
OG18987	CYB5_DROME;Cytochrome b5	Cyt-b5;PF00173.31	1	1	3
OG18991	NA	NA	1	1	3
OG18992	ACH10_ARATH;1-aminocyclopropane-1-carboxylate oxidase homolog 10	2OG-FeII_Oxy;PF03171.23^DIOX_N;PF14226.9	2	2	1
OG18993	AOP3C_ARATH;2-oxoglutarate-dependent dioxygenase AOP3	DIOX_N;PF14226.9^2OG-FeII_Oxy;PF03171.23	1	2	2
OG18994	NA	SQAPI;PF16845.8	1	2	2
OG18997	NA	NA	1	2	2
OG18998	NA	NA	2	1	2
OG18999	DRL27_ARATH;Disease resistance protein At4g27190	NB-ARC;PF00931.25^LRR_8;PF13855.9	1	3	1
OG19004	RGA1_SOLBU;Putative disease resistance protein RGA1	LRR_4;PF12799.10^NB-ARC;PF00931.25^LRR_8;PF13855.9^Rx_N;PF18052.4	2	1	2
OG19005	RGA2_SOLBU;Disease resistance protein RGA2	NB-ARC;PF00931.25^LRR_8;PF13855.9^LRR_4;PF12799.10^Rx_N;PF18052.4	1	3	1
OG19007	E13B_PHAVU;Glucan endo-13-beta-glucosidase basic isoform	Glyco_hydro_17;PF00332.21^X8;PF07983.16	1	2	2
OG19009	EFR_ARATH;LRR receptor-like serine/threonine-protein kinase EFR {ECO:0000303|PubMed:16713565}	LRR_4;PF12799.10^LRR_8;PF13855.9	1	1	3
OG19012	FBK67_ARATH;F-box/kelch-repeat protein At3g23880	F-box;PF00646.36	1	2	2
OG19014	AVT6A_ARATH;Amino acid transporter AVT6A {ECO:0000305}	Aa_trans;PF01490.21	3	1	1
OG19021	Y3471_ARATH;Putative receptor-like protein kinase At3g47110	LRR_8;PF13855.9^LRR_4;PF12799.10^LRR_1;PF00560.36^LRRNT_2;PF08263.15^PK_Tyr_Ser-Thr;PF07714.20^Pkinase;PF00069.28^LRR_6;PF13516.9	1	1	3
OG19022	AB3B_ARATH;ABC transporter B family member 3	SMC_N;PF02463.22^AAA_21;PF13304.9^ABC_tran;PF00005.30^ABC_membrane;PF00664.26^AAA_16;PF13191.9^ABC_ATPase;PF09818.12^AAA_29;PF13555.9	2	1	2
OG19024	POHS1_ARATH;Protein POOR HOMOLOGOUS SYNAPSIS 1 {ECO:0000303|PubMed:19918061}	NA	2	1	2
OG19025	VSP1_ARATH;Vegetative storage protein 1	Acid_phosphat_B;PF03767.17	2	1	2
OG19026	NA	NA	1	2	2
OG19028	MYB1_CROXC;Transcription factor MYB1 {ECO:0000305}	Myb_DNA-bind_6;PF13921.9^Myb_DNA-binding;PF00249.34	2	1	2
OG20084	SWC6_ARATH;SWR1 complex subunit 6	NA	1	1	2
OG20092	HDG8_ARATH;Homeobox-leucine zipper protein HDG8 {ECO:0000303|PubMed:16778018}	START;PF01852.22^Homeodomain;PF00046.32	1	1	2
OG20093	C71DB_LOTJA;Cytochrome P450 71D11	p450;PF00067.25	1	1	2
OG20096	MYB30_ORYSJ;Transcription factor MYB30 {ECO:0000305}	Myb_DNA-bind_6;PF13921.9^Myb_DNA-binding;PF00249.34	1	2	1
OG20097	NA	Dirigent;PF03018.17	1	1	2
OG20102	BIOF_ARATH;8-amino-7-oxononanoate synthase	NA	2	1	1
OG20103	R1B12_SOLDE;Putative late blight resistance protein homolog R1B-12	NB-ARC;PF00931.25^NB-LRR;PF12061.11	1	1	2
OG20107	E13B_SOLLC;Glucan endo-13-beta-glucosidase B	Glyco_hydro_17;PF00332.21	1	1	2
OG20108	DRL4_ARATH;Putative disease resistance protein At1g50180	NB-ARC;PF00931.25^Rx_N;PF18052.4	1	1	2
OG20109	Y3475_ARATH;Probable LRR receptor-like serine/threonine-protein kinase At3g47570	LRR_4;PF12799.10^LRR_8;PF13855.9^LRR_1;PF00560.36^LRR_6;PF13516.9^LRRNT_2;PF08263.15	1	1	2
OG20111	NFYB_MOUSE;Nuclear transcription factor Y subunit beta	CBFD_NFYB_HMF;PF00808.26	1	1	2
OG20112	PATJ1_SOLTU;Patatin group J-1	Patatin;PF01734.25	1	1	2
OG20113	NA	Ribonuclease_T2;PF00445.21	1	1	2
OG20114	ASK19_ARATH;SKP1-like protein 19	Skp1;PF01466.22^Skp1_POZ;PF03931.18	1	1	2
OG20115	SKP5_ORYSJ;SKP1-like protein 5 {ECO:0000303|PubMed:24616269}	Skp1_POZ;PF03931.18^Skp1;PF01466.22	1	1	2
OG20117	NA	NB-ARC;PF00931.25	1	2	1
OG20118	HY6H_HYONI;Hyoscyamine 6-dioxygenase	DIOX_N;PF14226.9	1	1	2
OG20119	GT12_ARATH;Probable xyloglucan galactosyltransferase GT12 {ECO:0000305}	Exostosin;PF03016.18	1	2	1
OG20127	NA	PAR1;PF06521.14	1	1	2
OG20129	YMG12_ARATH;YlmG homolog protein 1-2 chloroplastic {ECO:0000305}	YGGT;PF02325.20	1	1	2
OG20131	EREC2_ORYSJ;LRR receptor-like serine/threonine-protein kinase ER2 {ECO:0000305}	LRR_8;PF13855.9^LRR_4;PF12799.10^LRR_1;PF00560.36^Pkinase;PF00069.28^PK_Tyr_Ser-Thr;PF07714.20^LRRNT_2;PF08263.15	1	1	2
OG20133	CHI2_COCP7;Endochitinase 2	Glyco_hydro_18;PF00704.31	1	1	2
OG20134	NA	NA	1	1	2
OG20135	NA	PAR1;PF06521.14	1	1	2
OG20138	NA	Myb_CC_LHEQLE;PF14379.9	1	1	2
OG20139	PVIP_NICBE;OBERON-like protein	PHD_Oberon;PF07227.14	1	1	2
OG20141	NA	NA	1	1	2
OG20145	RAB14_DICDI;Ras-related protein Rab-14	Roc;PF08477.16^Ras;PF00071.25^Arf;PF00025.24	1	1	2
OG20146	NA	NA	1	1	2
OG20148	HOX17_ORYSJ;Homeobox-leucine zipper protein HOX17	Homeodomain;PF00046.32	1	1	2
OG20149	NA	NA	1	1	2
OG20154	HSP11_SOLLC;17.8 kDa class I heat shock protein	HSP20;PF00011.24	1	1	2
OG20155	NA	NA	1	1	2
OG20156	Y1869_ARATH;Uncharacterized protein At1g28695	Nucleotid_trans;PF03407.19	1	1	2
OG20157	RP8L4_ARATH;Probable disease resistance RPP8-like protein 4	NB-LRR;PF12061.11^NB-ARC;PF00931.25^Rx_N;PF18052.4	1	1	2
OG20159	NA	MRP-L47;PF06984.16	1	1	2
OG20164	UFD1_YEAST;Ubiquitin fusion degradation protein 1	UFD1;PF03152.17	1	1	2
OG20172	R1C3_SOLDE;Putative late blight resistance protein homolog R1C-3	NB-ARC;PF00931.25	1	1	2
OG20179	NA	NA	1	1	2
OG20181	NA	NA	1	1	2
OG20188	FER1_CYAPA;Ferredoxin-1	Fer2;PF00111.30	1	1	2
OG20190	NAC10_ORYSJ;NAC domain-containing protein 10 {ECO:0000303|PubMed:15029955}	NAM;PF02365.18	1	1	2
OG20193	C71E6_SOLLC;Beta-amyrin 6-beta-monooxygenase {ECO:0000305}	NA	1	1	2
OG20196	WUN1_SOLTU;Wound-induced protein 1	WI12;PF07107.14	1	1	2
OG20207	NA	NA	1	1	2
OG20208	TAS_SHIFL;Protein tas	DUF1668;PF07893.16	1	1	2
OG20212	CATIN_CAEEL;Splicing factor Cactin {ECO:0000305}	Cactin_mid;PF10312.12^CactinC_cactus;PF09732.12	1	1	2
OG20214	R1C3_SOLDE;Putative late blight resistance protein homolog R1C-3	NB-LRR;PF12061.11^NB-ARC;PF00931.25	1	1	2
OG20215	R1C3_SOLDE;Putative late blight resistance protein homolog R1C-3	NB-LRR;PF12061.11^NB-ARC;PF00931.25	1	2	1
OG20216	72A61_TRIFG;Cytochrome P450 CYP72A613 {ECO:0000303|PubMed:31324795}	p450;PF00067.25	1	1	2
OG20218	R1A3_SOLDE;Putative late blight resistance protein homolog R1A-3	NB-ARC;PF00931.25	1	1	2
OG20219	GT18_ARATH;Xyloglucan galactosyltransferase XLT2 {ECO:0000305}	Exostosin;PF03016.18	1	1	2
OG20220	RGA3_SOLBU;Putative disease resistance protein RGA3	NB-ARC;PF00931.25^Rx_N;PF18052.4	1	1	2
OG20224	TM2S_SOLLC;ToMV susceptible protein tm-2 {ECO:0000303|PubMed:14558663}	NB-ARC;PF00931.25^AAA_16;PF13191.9	1	2	1
OG20225	PME_DAUCA;Pectinesterase	Pectinesterase;PF01095.22	1	1	2
OG20227	NA	NA	1	1	2
OG20228	SRM1_ARATH;Transcription factor SRM1 {ECO:0000305}	Myb_DNA-binding;PF00249.34	1	1	2
OG20229	AVT1J_ARATH;Amino acid transporter AVT1J {ECO:0000305}	Aa_trans;PF01490.21	1	1	2
OG20230	R1A6_SOLDE;Putative late blight resistance protein homolog R1A-6	NB-ARC;PF00931.25^NB-LRR;PF12061.11	1	1	2
OG20232	RAP22_ARATH;Ethylene-responsive transcription factor RAP2-2	NA	1	1	2
OG20234	DIR12_ARATH;Dirigent protein 12	Dirigent;PF03018.17	1	1	2
OG20237	NA	NA	1	1	2
OG20238	MMSA_HUMAN;Methylmalonate-semialdehyde dehydrogenase [acylating] mitochondrial	Aldedh;PF00171.25	2	1	1
OG20240	ANX13_HUMAN;Annexin A13	Annexin;PF00191.23	1	2	1
OG20241	BH018_ARATH;Transcription factor bHLH18	HLH;PF00010.29	1	1	2
OG20242	M2K4_ARATH;Mitogen-activated protein kinase kinase 4	PK_Tyr_Ser-Thr;PF07714.20^Pkinase;PF00069.28	1	1	2
OG20248	R1A_SOLDE;Late blight resistance protein R1-A	NB-ARC;PF00931.25	1	1	2
OG20251	GAI_ARATH;DELLA protein GAI {ECO:0000303|PubMed:9389651}	GRAS;PF03514.17	1	1	2
OG20255	NA	DUF3522;PF12036.11	1	1	2
OG20256	SR543_ARATH;Signal recognition particle subunit SRP54 3	SRP_SPB;PF02978.22^SRP54;PF00448.25^SRP54_N;PF02881.22	1	1	2
OG20258	MYB30_ANTMA;Myb-related protein 330	Myb_DNA-binding;PF00249.34^Myb_DNA-bind_6;PF13921.9	1	1	2
OG20263	R13L2_ARATH;Putative disease resistance RPP13-like protein 2	LRR_4;PF12799.10^NB-ARC;PF00931.25^Rx_N;PF18052.4	1	1	2
OG20264	TCX8_ARATH;Protein tesmin/TSO1-like CXC 8	TCR;PF03638.18	1	1	2
OG20265	FB207_ARATH;Putative F-box protein At3g58860	LRR_2;PF07723.16^FBD;PF08387.13	1	1	2
OG20266	TMK1_ARATH;Receptor protein kinase TMK1 {ECO:0000303|PubMed:1332795}	LRR_4;PF12799.10^LRR_8;PF13855.9^LRR_1;PF00560.36^PK_Tyr_Ser-Thr;PF07714.20^Pkinase;PF00069.28^LRRNT_2;PF08263.15	1	1	2
OG20267	DRL12_ARATH;Probable disease resistance protein At1g59620	NB-ARC;PF00931.25^Rx_N;PF18052.4^LRR_8;PF13855.9^LRR_4;PF12799.10	1	1	2
OG20268	MYB20_ARATH;Transcription factor MYB20 {ECO:0000305}	Myb_DNA-binding;PF00249.34^Myb_DNA-bind_6;PF13921.9	1	1	2
OG20270	NA	NA	1	1	2
OG20272	DRL8_ARATH;Putative disease resistance protein At1g58400	LRR_8;PF13855.9^NB-ARC;PF00931.25	1	1	2
OG20277	RX24L_ARATH;Probable disease resistance protein RXW24L	NB-ARC;PF00931.25^LRR_8;PF13855.9^Rx_N;PF18052.4	1	1	2
OG20279	DRL10_ARATH;Probable disease resistance protein RF45	Rx_N;PF18052.4^NB-LRR;PF12061.11^NB-ARC;PF00931.25	1	1	2
OG20281	NA	RVT_3;PF13456.9^zf-RVT;PF13966.9	1	1	2
OG20282	R1B13_SOLDE;Putative late blight resistance protein homolog R1B-13	NB-ARC;PF00931.25^NB-LRR;PF12061.11^AAA_22;PF13401.9	1	1	2
OG20284	F6H22_IPOBA;Bi-functional coumaroyl CoA and feruloyl CoA ortho-hydroxylase F6H2-2-1 {ECO:0000303|PubMed:22169019}	2OG-FeII_Oxy;PF03171.23^DIOX_N;PF14226.9	1	1	2
OG20287	Y3918_ARATH;B3 domain-containing protein At3g19184	B3;PF02362.24	1	1	2
OG20289	NA	NA	1	1	2
OG20296	NA	Rep_fac-A_C;PF08646.13	2	1	1
OG20297	NA	NA	2	1	1
OG20298	EXB10_ORYSJ;Expansin-B10	DPBB_1;PF03330.21^Expansin_C;PF01357.24	1	1	2
OG20301	PUP7_ARATH;Probable purine permease 7	PUNUT;PF16913.8^EamA;PF00892.23	2	1	1
OG20303	RADL6_ARATH;Protein RADIALIS-like 6	NA	1	1	2
OG20307	AGL23_ARATH;Agamous-like MADS-box protein AGL23 {ECO:0000305}	SRF-TF;PF00319.21	1	1	2
OG20312	NA	NA	1	1	2
OG20313	QORL2_BOVIN;Quinone oxidoreductase-like protein 2	ADH_zinc_N;PF00107.29^ADH_N;PF08240.15	1	1	2
OG20315	PBL34_ARATH;Serine/threonine-protein kinase PBL34 {ECO:0000303|PubMed:29907700}	PK_Tyr_Ser-Thr;PF07714.20^Pkinase;PF00069.28	1	1	2
OG20316	NA	Pep1_7;PF17232.5	1	1	2
OG20317	NLA_ARATH;E3 ubiquitin-protein ligase NLA {ECO:0000305}	NA	1	1	2
OG20320	C90B1_BRADI;Steroid (22S)-hydroxylase {ECO:0000305}	p450;PF00067.25	2	1	1
OG20324	P4H2_ARATH;Prolyl 4-hydroxylase 2 {ECO:0000305}	2OG-FeII_Oxy;PF03171.23^2OG-FeII_Oxy_3;PF13640.9^RVT_3;PF13456.9	1	1	2
OG20325	PTR46_ARATH;Protein NRT1/ PTR FAMILY 5.4	PTR2;PF00854.24	1	1	2
OG20329	MCAS_MYCBO;Mycocerosic acid synthase	ADH_N;PF08240.15^ADH_zinc_N;PF00107.29^ADH_zinc_N_2;PF13602.9	1	1	2
OG20330	SRF3_ARATH;Protein STRUBBELIG-RECEPTOR FAMILY 3	Pkinase;PF00069.28^PK_Tyr_Ser-Thr;PF07714.20	1	1	2
OG20331	MCTP2_ARATH;Multiple C2 domain and transmembrane region protein 2 {ECO:0000303|PubMed:29259105}	C2;PF00168.33^PRT_C;PF08372.13	1	1	2
OG20333	ERF38_ARATH;Ethylene-responsive transcription factor ERF038	AP2;PF00847.23	1	1	2
OG20334	U76E7_ARATH;UDP-glycosyltransferase 76E7	UDPGT;PF00201.21	1	1	2
OG20335	RX24L_ARATH;Probable disease resistance protein RXW24L	NB-ARC;PF00931.25	1	1	2
OG20336	RLF34_ARATH;Protein RALF-like 34	RALF;PF05498.14	1	1	2
OG20337	R1C3_SOLDE;Putative late blight resistance protein homolog R1C-3	NB-ARC;PF00931.25^ubiquitin;PF00240.26	1	1	2
OG20338	R1A_SOLDE;Late blight resistance protein R1-A	NB-LRR;PF12061.11^NB-ARC;PF00931.25	1	1	2
OG20339	MES16_ARATH;pFDCC methylesterase MES16 {ECO:0000303|PubMed:23723324}	Abhydrolase_1;PF00561.23^Hydrolase_4;PF12146.11^Abhydrolase_6;PF12697.10	1	1	2
OG20340	NA	NA	1	1	2
OG20341	NA	NA	1	1	2
OG20345	NTF2_ARATH;Nuclear transport factor 2 {ECO:0000303|PubMed:28229965}	RRM_1;PF00076.25^NTF2;PF02136.23	1	1	2
OG20346	TM9S1_MOUSE;Transmembrane 9 superfamily member 1	EMP70;PF02990.19	1	1	2
OG20347	R1C3_SOLDE;Putative late blight resistance protein homolog R1C-3	NB-ARC;PF00931.25	1	2	1
OG20348	RP8L2_ARATH;Probable disease resistance RPP8-like protein 2	NB-LRR;PF12061.11^NB-ARC;PF00931.25	1	1	2
OG20351	PPID_HUMAN;Peptidyl-prolyl cis-trans isomerase D {ECO:0000305|PubMed:11350175 ECO:0000305|PubMed:20676357}	Pro_isomerase;PF00160.24	1	1	2
OG20355	C7A47_PANGI;Dammarenediol 12-hydroxylase {ECO:0000305}	p450;PF00067.25	2	1	1
OG20356	EIX1_SOLLC;Receptor-like protein EIX1 {ECO:0000305}	LRR_8;PF13855.9^LRR_4;PF12799.10^LRR_1;PF00560.36	1	2	1
OG20359	LRK22_ARATH;Putative L-type lectin-domain containing receptor kinase II.2	LRR_4;PF12799.10^LRR_8;PF13855.9^LRR_1;PF00560.36^LRRNT_2;PF08263.15^Pkinase;PF00069.28^PK_Tyr_Ser-Thr;PF07714.20	1	1	2
OG20361	PHL2_ARATH;Protein PHR1-LIKE 2 {ECO:0000303|PubMed:26586833}	NA	1	1	2
OG20362	R1B14_SOLDE;Putative late blight resistance protein homolog R1B-14	NB-ARC;PF00931.25	1	1	2
OG20364	FB145_ARATH;Putative F-box protein At3g16210	F-box;PF00646.36	1	1	2
OG20365	TMN2_ARATH;Transmembrane 9 superfamily member 2 {ECO:0000305}	EMP70;PF02990.19	1	1	2
OG20366	RP8L4_ARATH;Probable disease resistance RPP8-like protein 4	NB-ARC;PF00931.25	1	1	2
OG20368	BAHL2_ORYSJ;Probable E3 ubiquitin-protein ligase BAH1-like 2	zf-C3HC4;PF00097.28	1	1	2
OG20369	PHYK3_SOYBN;Probable phytol kinase 3 chloroplastic	NA	2	1	1
OG20384	RNS4_ANTHI;Ribonuclease S-4	Ribonuclease_T2;PF00445.21	1	1	2
OG20385	GRC10_ORYSJ;Glutaredoxin-C10	Glutaredoxin;PF00462.27	1	1	2
OG20388	CADH1_ARATH;Probable cinnamyl alcohol dehydrogenase 1	ADH_zinc_N;PF00107.29	1	2	1
OG20389	NA	NA	1	1	2
OG20397	NA	NA	2	1	1
OG20398	BRI1_SOLLC;Brassinosteroid LRR receptor kinase	Pkinase;PF00069.28^PK_Tyr_Ser-Thr;PF07714.20	1	1	2
OG20399	1433_MESCR;14-3-3-like protein	14-3-3;PF00244.23	1	2	1
OG20402	PIK2_ORYSJ;Disease resistance protein Pik-2 {ECO:0000305}	NB-ARC;PF00931.25^Rx_N;PF18052.4	1	1	2
OG20403	SBT13_ARATH;Subtilisin-like protease SBT1.3 {ECO:0000303|PubMed:16193095}	Inhibitor_I9;PF05922.19^Peptidase_S8;PF00082.25^fn3_6;PF17766.4^PA;PF02225.25	1	1	2
OG20404	NA	F-box-like;PF12937.10^F-box;PF00646.36	1	1	2
OG20407	SYP22_ARATH;Syntaxin-22	Syntaxin_2;PF14523.9^SNARE;PF05739.22	1	1	2
OG20408	NA	Rce1-like;PF02517.19	1	1	2
OG20410	NA	NA	1	1	2
OG20411	PABN2_ARATH;Polyadenylate-binding protein 2 {ECO:0000303|PubMed:18479511}	RRM_1;PF00076.25	1	1	2
OG20412	LBD3_ARATH;LOB domain-containing protein 3	LOB;PF03195.17	1	1	2
OG20413	KCS13_ARATH;3-ketoacyl-CoA synthase 13 {ECO:0000303|PubMed:18465198}	FAE1_CUT1_RppA;PF08392.15^ACP_syn_III_C;PF08541.13^Chal_sti_synt_C;PF02797.18	1	2	1
OG20415	NA	SQAPI;PF16845.8	1	1	2
OG20416	NA	Pollen_Ole_e_1;PF01190.20	1	1	2
OG20417	UAF30_YEAST;Upstream activation factor subunit UAF30	SWIB;PF02201.21^DEK_C;PF08766.14	1	1	2
OG20419	NA	DUF2828;PF11443.11	1	1	2
OG20420	NA	NA	1	1	2
OG20421	P2A06_ARATH;Protein PHLOEM PROTEIN 2-LIKE A6	PP2;PF14299.9	1	1	2
OG20422	TATD1_HUMAN;Deoxyribonuclease TATDN1	TatD_DNase;PF01026.24	1	2	1
OG20423	NA	DUF3444;PF11926.11	1	1	2
OG20424	IDD9_ARATH;Zinc finger protein BALDIBIS {ECO:0000303|PubMed:25829440}	NA	1	1	2
OG20427	ARF1_CATRO;ADP-ribosylation factor 1	G-alpha;PF00503.23^Arf;PF00025.24^Ras;PF00071.25^SRPRB;PF09439.13^Roc;PF08477.16	1	1	2
OG20433	MNS2_ARATH;Mannosyl-oligosaccharide 12-alpha-mannosidase MNS2	Glyco_hydro_47;PF01532.23	2	1	1
OG20437	NFYC1_ARATH;Nuclear transcription factor Y subunit C-1	NA	1	2	1
OG20443	SAU26_ARATH;Auxin-responsive protein SAUR26 {ECO:0000305}	Auxin_inducible;PF02519.17	2	1	1
OG20444	GPC1_RICCO;Glycerophosphocholine acyltransferase 1 {ECO:0000303|PubMed:27758859}	DUF2838;PF10998.11	1	2	1
OG20449	FBK59_ARATH;F-box/kelch-repeat protein At3g17530	F-box;PF00646.36	1	1	2
OG20450	RHD3_ARATH;Protein ROOT HAIR DEFECTIVE 3 {ECO:0000255|HAMAP-Rule:MF_03109}	RHD3_GTPase;PF05879.15^Sey1_3HB;PF20428.1^GBP;PF02263.22^MMR_HSR1;PF01926.26	1	1	2
OG20451	CPR1_ARATH;F-box protein CPR1	F-box-like;PF12937.10^F-box;PF00646.36	1	1	2
OG20452	FB239_ARATH;Putative F-box protein At4g21240	F-box;PF00646.36	1	1	2
OG20454	PMT3_ARATH;Probable methyltransferase PMT3	Methyltransf_31;PF13847.9^Methyltransf_25;PF13649.9^Methyltransf_23;PF13489.9^Methyltransf_11;PF08241.15^Methyltransf_29;PF03141.19	1	2	1
OG20456	PP2B8_ARATH;Putative F-box protein PP2-B8	PP2;PF14299.9	1	1	2
OG20459	DRL7_ARATH;Probable disease resistance protein At1g58390	NB-ARC;PF00931.25^Rx_N;PF18052.4	2	1	1
OG20462	NA	NA	1	1	2
OG20463	PXG1_AVESA;Peroxygenase 1	Caleosin;PF05042.16	1	1	2
OG20464	R1B23_SOLDE;Putative late blight resistance protein homolog R1B-23	NB-ARC;PF00931.25^NB-LRR;PF12061.11	1	1	2
OG20467	CPR1_ARATH;F-box protein CPR1	F-box-like;PF12937.10^F-box;PF00646.36	1	2	1
OG20471	DRL21_ARATH;Putative disease resistance protein At3g14460	LRR_4;PF12799.10^LRR_8;PF13855.9^NB-ARC;PF00931.25^Rx_N;PF18052.4	1	1	2
OG20475	RGA3_SOLBU;Putative disease resistance protein RGA3	NB-ARC;PF00931.25^Rx_N;PF18052.4	2	1	1
OG20477	PTR1_ARATH;Protein NRT1/ PTR FAMILY 8.1	PTR2;PF00854.24	1	1	2
OG20479	U89A2_ARATH;UDP-glycosyltransferase 89A2	UDPGT;PF00201.21	1	1	2
OG20481	UGT13_HORVV;UDP-glucosyltransferase UGT13248 {ECO:0000305}	UDPGT;PF00201.21	1	1	2
OG20483	Y3720_ARATH;UPF0481 protein At3g47200	DUF247;PF03140.18	1	2	1
OG20485	KNOS1_ORYSJ;Homeobox protein knotted-1-like 1	KNOX1;PF03790.16^KNOX2;PF03791.16^Homeobox_KN;PF05920.14^ELK;PF03789.16	1	1	2
OG20487	CB60A_ARATH;Calmodulin-binding protein 60 A {ECO:0000303|PubMed:11782485}	Calmodulin_bind;PF07887.14^Calmod_bind_C;PF20452.1^Calmod_bind_M;PF20451.1	1	1	2
OG20489	CHUP1_ARATH;Protein CHUP1 chloroplastic	NA	1	1	2
OG20490	PIX13_ARATH;Probable serine/threonine-protein kinase PIX13 {ECO:0000305}	PK_Tyr_Ser-Thr;PF07714.20^Pkinase;PF00069.28	1	1	2
OG20493	CPR1_ARATH;F-box protein CPR1	FBA_1;PF07734.16^F-box;PF00646.36	1	1	2
OG20494	Y2165_ARATH;Probable LRR receptor-like serine/threonine-protein kinase At2g16250	Pkinase;PF00069.28^PK_Tyr_Ser-Thr;PF07714.20	1	1	2
OG20495	NEPRN_NEPVE;Protein neprosin {ECO:0000303|PubMed:27481162}	Neprosin;PF03080.18^Neprosin_AP;PF14365.9	1	1	2
OG20496	NA	NIF;PF03031.21	1	1	2
OG20497	EIX2_SOLLC;Receptor-like protein EIX2 {ECO:0000305}	LRR_8;PF13855.9^LRR_4;PF12799.10^LRR_1;PF00560.36^LRRNT_2;PF08263.15	1	1	2
OG20504	E70B2_ARATH;Exocyst complex component EXO70B2 {ECO:0000303|PubMed:16942608}	Exo70;PF03081.18	1	1	2
OG20508	ERF98_ARATH;Ethylene-responsive transcription factor ERF098	AP2;PF00847.23	2	1	1
OG22147	C90A1_ARATH;3beta22alpha-dihydroxysteroid 3-dehydrogenase {ECO:0000305}	p450;PF00067.25	1	1	1
OG22149	BBE14_ARATH;Berberine bridge enzyme-like 14 {ECO:0000303|PubMed:26037923}	BBE;PF08031.15^FAD_binding_4;PF01565.26	1	1	1
OG22157	SINA4_ARATH;E3 ubiquitin-protein ligase SINAT4 {ECO:0000305}	Sina;PF03145.19	1	1	1
OG22158	NA	NA	1	1	1
OG22159	NA	NA	1	1	1
OG22160	PSY_NARPS;Phytoene synthase chloroplastic	SQS_PSY;PF00494.22	1	1	1
OG22172	ACOX3_ARATH;Acyl-coenzyme A oxidase 3 peroxisomal	ACOX;PF01756.22	1	1	1
OG22173	2A5A_MOUSE;Serine/threonine-protein phosphatase 2A 56 kDa regulatory subunit alpha isoform	B56;PF01603.23	1	1	1
OG22174	PUX4_ARATH;Plant UBX domain-containing protein 4 {ECO:0000303|Ref.6}	SEP;PF08059.16	1	1	1
OG22175	NA	NA	1	1	1
OG22179	NA	NA	1	1	1
OG22182	PME34_ARATH;Probable pectinesterase/pectinesterase inhibitor 34	Pectinesterase;PF01095.22^PMEI;PF04043.18	1	1	1
OG22184	NA	NA	1	1	1
OG22187	NA	DDE_Tnp_4;PF13359.9	1	1	1
OG22191	NA	NA	1	1	1
OG22197	ARI10_ARATH;Probable E3 ubiquitin-protein ligase ARI10	IBR;PF01485.24	1	1	1
OG22201	NA	NA	1	1	1
OG22221	IF1A_SULIK;Translation initiation factor 1A {ECO:0000255|HAMAP-Rule:MF_00216}	eIF-1a;PF01176.22	1	1	1
OG22224	Y4597_ARATH;Uncharacterized protein At4g15970	Nucleotid_trans;PF03407.19	1	1	1
OG22234	VATG2_ARATH;V-type proton ATPase subunit G2	V-ATPase_G;PF03179.18	1	1	1
OG22235	TIL_ARATH;Temperature-induced lipocalin-1 {ECO:0000303|PubMed:18671872}	Lipocalin_2;PF08212.15	1	1	1
OG22242	SKI20_ARATH;F-box/kelch-repeat protein SKIP20	Kelch_1;PF01344.28^Kelch_6;PF13964.9^Kelch_3;PF13415.9^Kelch_4;PF13418.9^Kelch_2;PF07646.18	1	1	1
OG22245	R13L2_ARATH;Putative disease resistance RPP13-like protein 2	LRR_4;PF12799.10^Rx_N;PF18052.4^NB-ARC;PF00931.25	1	1	1
OG22246	PP390_ARATH;Pentatricopeptide repeat-containing protein At5g16860	PPR;PF01535.23^PPR_2;PF13041.9^PPR_1;PF12854.10^PPR_3;PF13812.9^E_motif;PF20431.1^PPR_long;PF17177.7	1	1	1
OG22247	GDT14_ARATH;GDT1-like protein 4	UPF0016;PF01169.22	1	1	1
OG22248	FBL62_ARATH;Putative F-box/LRR-repeat protein At3g59170	FBD;PF08387.13	1	1	1
OG22261	14336_ARATH;14-3-3-like protein G-BOX factor 14 lambda {ECO:0000303|PubMed:9276953 ECO:0000303|Ref.4}	14-3-3;PF00244.23	1	1	1
OG22263	NIP42_ARATH;Probable aquaporin NIP4-2	MIP;PF00230.23	1	1	1
OG22265	C71AJ_APIGR;Psoralen synthase	p450;PF00067.25	1	1	1
OG22275	GT13_ARATH;Probable xyloglucan galactosyltransferase GT13 {ECO:0000305}	Exostosin;PF03016.18	1	1	1
OG22278	FDL2_ARATH;F-box/FBD/LRR-repeat protein At1g13780	NA	1	1	1
OG22290	NA	DUF1350;PF07082.14	1	1	1
OG22303	NA	LRR_4;PF12799.10^LRR_8;PF13855.9^LRR_1;PF00560.36	1	1	1
OG22312	NOV_ARATH;Protein NO VEIN {ECO:0000303|PubMed:19880797}	NA	1	1	1
OG22313	BGL32_ARATH;Beta-glucosidase 32 {ECO:0000303|PubMed:15604686}	Glyco_hydro_1;PF00232.21	1	1	1
OG22314	NA	Ank_5;PF13857.9^Ank_3;PF13606.9^Ank;PF00023.33^Ank_4;PF13637.9^Ank_2;PF12796.10^PGG;PF13962.9	1	1	1
OG22315	EXLA2_ARATH;Expansin-like A2	Expansin_C;PF01357.24^DPBB_1;PF03330.21	1	1	1
OG22320	RETIC_ARATH;Protein RETICULATA chloroplastic {ECO:0000303|PubMed:16873448}	RETICULATA-like;PF11891.11	1	1	1
OG22321	BSD2_ARATH;Protein BUNDLE SHEATH DEFECTIVE 2 chloroplastic {ECO:0000303|PubMed:29217567}	NA	1	1	1
OG22323	H2B4_CAEEL;Probable histone H2B 4	Histone;PF00125.27	1	1	1
OG22325	TAF9_ARATH;Transcription initiation factor TFIID subunit 9	TFIID-31kDa;PF02291.18	1	1	1
OG22332	C76BA_SWEMU;Geraniol 8-hydroxylase	p450;PF00067.25	1	1	1
OG22342	MAD14_ORYSJ;MADS-box transcription factor 14	SRF-TF;PF00319.21	1	1	1
OG22347	AGL61_ARATH;Agamous-like MADS-box protein AGL61	SRF-TF;PF00319.21	1	1	1
OG22350	NA	NA	1	1	1
OG22351	MDHG_CITLA;Malate dehydrogenase glyoxysomal	Ldh_1_N;PF00056.26	1	1	1
OG22352	FDP_ARATH;bZIP transcription factor 27 {ECO:0000303|PubMed:11906833}	bZIP_2;PF07716.18^bZIP_1;PF00170.24	1	1	1
OG22360	PTR30_ARATH;Protein NRT1/ PTR FAMILY 5.1	PTR2;PF00854.24	1	1	1
OG22365	SBT47_ARATH;Subtilisin-like protease SBT4.7 {ECO:0000303|PubMed:16193095}	Peptidase_S8;PF00082.25^fn3_6;PF17766.4	1	1	1
OG22366	NA	NA	1	1	1
OG22372	RH28_ARATH;DEAD-box ATP-dependent RNA helicase 28	NA	1	1	1
OG22373	NA	Ank_3;PF13606.9^Ank_2;PF12796.10^Ank_4;PF13637.9^Ank_5;PF13857.9^PGG;PF13962.9	1	1	1
OG22377	NA	NA	1	1	1
OG22380	Y4345_ARATH;Probable receptor-like serine/threonine-protein kinase At4g34500	Pkinase;PF00069.28^PK_Tyr_Ser-Thr;PF07714.20	1	1	1
OG22382	IFR_MEDSA;Isoflavone reductase {ECO:0000303|PubMed:7866024}	NmrA;PF05368.16	1	1	1
OG22383	R13L2_ARATH;Putative disease resistance RPP13-like protein 2	NB-ARC;PF00931.25	1	1	1
OG22387	NA	Extensin_2;PF04554.16	1	1	1
OG22389	Y2245_ARATH;Uncharacterized TPR repeat-containing protein At2g32450	TPR_8;PF13181.9^TPR_16;PF13432.9^TPR_11;PF13414.9^TPR_19;PF14559.9^TPR_2;PF07719.20^TPR_1;PF00515.31^TPR_12;PF13424.9^TPR_14;PF13428.9^TPR_6;PF13174.9^TPR_17;PF13431.9^EF-hand_1;PF00036.35^EF-hand_7;PF13499.9^EF-hand_6;PF13405.9^EF-hand_5;PF13202.9	1	1	1
OG22391	NA	NA	1	1	1
OG22393	FYPP3_ARATH;Phytochrome-associated serine/threonine-protein phosphatase 3 {ECO:0000303|PubMed:12468726}	Metallophos;PF00149.31	1	1	1
OG22405	FB202_ARATH;Putative F-box protein At3g52320	F-box;PF00646.36^F-box-like;PF12937.10	1	1	1
OG22413	EIX2_SOLLC;Receptor-like protein EIX2 {ECO:0000305}	LRR_4;PF12799.10^LRR_8;PF13855.9^LRR_1;PF00560.36^LRRNT_2;PF08263.15	1	1	1
OG22416	CAF1I_ARATH;Probable CCR4-associated factor 1 homolog 9	CAF1;PF04857.23	1	1	1
OG22420	GLOX_ARTAN;Putative aldehyde oxidase Art an 7 {ECO:0000305}	Glyoxal_oxid_N;PF07250.14^GO-like_E_set;PF09118.14	1	1	1
OG22422	SV91A_DANRE;Histone-lysine N-methyltransferase SUV39H1-A	SET;PF00856.31^Pre-SET;PF05033.19	1	1	1
OG22423	R1A3_SOLDE;Putative late blight resistance protein homolog R1A-3	NB-LRR;PF12061.11^NB-ARC;PF00931.25	1	1	1
OG22424	R13L4_ARATH;Disease resistance RPP13-like protein 4	NB-ARC;PF00931.25	1	1	1
OG22425	NA	NA	1	1	1
OG22433	CHIE_BETVU;Acidic endochitinase SE2	Glyco_hydro_18;PF00704.31	1	1	1
OG22434	NA	LRR_4;PF12799.10^LRR_8;PF13855.9^LRR_1;PF00560.36^LRRNT_2;PF08263.15	1	1	1
OG22435	NA	NA	1	1	1
OG22467	NA	NA	1	1	1
OG22468	NA	NA	1	1	1
OG22469	NA	NA	1	1	1
OG22471	EBIII_PETHY;MYB-like transcription factor 4 {ECO:0000303|PubMed:21068208}	Myb_DNA-binding;PF00249.34^Myb_DNA-bind_6;PF13921.9	1	1	1
OG22480	MRS2I_ORYSI;Magnesium transporter MRS2-I	NA	1	1	1
OG22481	MRS2D_ORYSJ;Putative magnesium transporter MRS2-D	NA	1	1	1
OG22482	MRS2E_ORYSI;Magnesium transporter MRS2-E	NA	1	1	1
OG22483	FBK28_ARATH;F-box/kelch-repeat protein At1g67480	Kelch_2;PF07646.18^Kelch_6;PF13964.9^Kelch_4;PF13418.9^Kelch_1;PF01344.28	1	1	1
OG22484	APMAP_SALSA;Adipocyte plasma membrane-associated protein	NHL;PF01436.24^Str_synth;PF03088.19^SGL;PF08450.15	1	1	1
OG22494	NA	DUF3444;PF11926.11	1	1	1
OG22495	NA	NA	1	1	1
OG22496	PPIA_NOMLE;Peptidyl-prolyl cis-trans isomerase A	Pro_isomerase;PF00160.24	1	1	1
OG22500	ARI9_ARATH;Probable E3 ubiquitin-protein ligase ARI9	IBR;PF01485.24	1	1	1
OG22505	DRL12_ARATH;Probable disease resistance protein At1g59620	LRR_4;PF12799.10^LRR_8;PF13855.9^Rx_N;PF18052.4^NB-ARC;PF00931.25	1	1	1
OG22506	BGL12_ORYSJ;Beta-glucosidase 12 {ECO:0000305}	Glyco_hydro_1;PF00232.21	1	1	1
OG22508	NA	AGP;PF06376.15	1	1	1
OG22510	FLS_CITUN;Flavonol synthase/flavanone 3-hydroxylase	2OG-FeII_Oxy;PF03171.23^DIOX_N;PF14226.9	1	1	1
OG22515	KCS1_ARATH;3-ketoacyl-CoA synthase 1 {ECO:0000303|PubMed:10074711}	FAE1_CUT1_RppA;PF08392.15^Chal_sti_synt_C;PF02797.18^ACP_syn_III_C;PF08541.13	1	1	1
OG22516	AT2B1_MOUSE;Plasma membrane calcium-transporting ATPase 1 {ECO:0000305}	E1-E2_ATPase;PF00122.23^Chlorophyllase;PF07224.14^Chlorophyllase2;PF12740.10	1	1	1
OG22520	RP8L3_ARATH;Disease resistance RPP8-like protein 3	NB-ARC;PF00931.25^LRR_4;PF12799.10^Rx_N;PF18052.4	1	1	1
OG22521	DRL8_ARATH;Putative disease resistance protein At1g58400	NB-ARC;PF00931.25	1	1	1
OG22523	DRL4_ARATH;Putative disease resistance protein At1g50180	NB-ARC;PF00931.25^Rx_N;PF18052.4	1	1	1
OG22530	XA21_ORYSI;Receptor kinase-like protein Xa21 {ECO:0000303|Ref.1}	LRR_4;PF12799.10^LRR_8;PF13855.9^LRR_1;PF00560.36^LRR_6;PF13516.9^PK_Tyr_Ser-Thr;PF07714.20^Pkinase;PF00069.28^LRRNT_2;PF08263.15	1	1	1
OG22540	C71AM_ARATH;Cytochrome P450 71A22	p450;PF00067.25	1	1	1
OG22550	WOX13_ARATH;WUSCHEL-related homeobox 13	Homeodomain;PF00046.32	1	1	1
OG22551	R1A4_SOLDE;Putative late blight resistance protein homolog R1A-4	NB-ARC;PF00931.25	1	1	1
OG22554	C71DK_TOBAC;5-epiaristolochene 13-dihydroxylase	p450;PF00067.25	1	1	1
OG22556	NEPRN_NEPVE;Protein neprosin {ECO:0000303|PubMed:27481162}	Neprosin;PF03080.18^Neprosin_AP;PF14365.9	1	1	1
OG22558	DRL45_ARATH;Probable disease resistance protein RDL6	NB-ARC;PF00931.25^Rx_N;PF18052.4	1	1	1
OG22561	LRL28_ARATH;LEAF RUST 10 DISEASE-RESISTANCE LOCUS RECEPTOR-LIKE PROTEIN KINASE-like 2.8 {ECO:0000303|PubMed:12805585}	PK_Tyr_Ser-Thr;PF07714.20^Pkinase;PF00069.28^WAK_assoc;PF14380.9^GUB_WAK_bind;PF13947.9	1	1	1
OG22563	SD113_ARATH;G-type lectin S-receptor-like serine/threonine-protein kinase SD1-13	B_lectin;PF01453.27^PK_Tyr_Ser-Thr;PF07714.20^Pkinase;PF00069.28	1	1	1
OG22564	NA	NA	1	1	1
OG22565	TRNH8_ARATH;Tropinone reductase homolog At2g29310 {ECO:0000305}	adh_short;PF00106.28^adh_short_C2;PF13561.9^KR;PF08659.13	1	1	1
OG22567	PME62_ARATH;Pectinesterase QRT1 {ECO:0000303|PubMed:16980565}	Pectinesterase;PF01095.22	1	1	1
OG22570	NA	NA	1	1	1
OG22572	PP269_ARATH;Pentatricopeptide repeat-containing protein At3g48250 chloroplastic	PPR_2;PF13041.9^PPR;PF01535.23^PPR_1;PF12854.10	1	1	1
OG22573	E70A3_ARATH;Exocyst complex component EXO70A3 {ECO:0000303|PubMed:16942608 ECO:0000303|PubMed:31299202}	Exo70;PF03081.18	1	1	1
OG22574	MFT2_ORYSJ;Protein MOTHER of FT and TFL1 homolog 2 {ECO:0000305}	PBP;PF01161.23	1	1	1
OG22575	CIRBP_LITCT;Cold-inducible RNA-binding protein {ECO:0000303|PubMed:10817911}	RRM_1;PF00076.25	1	1	1

## Sheet: Table S4
Table S4. Enriched GO biological processes in Coffea-specific orthogroups
GO ID	GO Term	Funtional Category	FDR
GO:0009626	plant-type hypersensitive response	Defense/Stress Response	7.35588e-140
GO:0006614	SRP-dependent cotranslational protein targeting to membrane	Protein Targeting/Modification	9.6219e-09
GO:0009697	salicylic acid biosynthetic process	Defense/Stress Response	7.17706e-06
GO:0009410	response to xenobiotic stimulus	Defense/Stress Response	5.21704e-05
GO:0031998	regulation of fatty acid beta-oxidation	Secondary Metabolism	0.000101579
GO:0009820	alkaloid metabolic process	Secondary Metabolism	0.000104577
GO:0080163	regulation of protein serine/threonine phosphatase activity	Regulatory Process	0.000217213
GO:0080021	response to benzoic acid	Defense/Stress Response	0.000291786
GO:0080003	thalianol metabolic process	Secondary Metabolism	0.000487869
GO:0071476	cellular hypotonic response	Defense/Stress Response	0.000938295
GO:1901017	negative regulation of potassium ion transmembrane transporter activity	Regulatory Process	0.000852996
GO:1990869	cellular response to chemokine	Defense/Stress Response	0.000721766
GO:0038146	chemokine (C-X-C motif) ligand 12 signaling pathway	Regulatory Process	0.000670211
GO:1901380	negative regulation of potassium ion transmembrane transport	Regulatory Process	0.000586434
GO:0009627	systemic acquired resistance	Defense/Stress Response	0.000932214
GO:0035835	indole alkaloid biosynthetic process	Secondary Metabolism	0.00171781
GO:0051289	protein homotetramerization	Protein Targeting/Modification	0.0024561
GO:0080093	regulation of photorespiration	Regulatory Process	0.00253841
GO:0080026	response to indolebutyric acid	Defense/Stress Response	0.00325101
GO:0019742	pentacyclic triterpenoid metabolic process	Secondary Metabolism	0.00331443
GO:0009969	xyloglucan biosynthetic process	Secondary Metabolism	0.00382571
GO:0051103	DNA ligation involved in DNA repair	DNA Repair	0.00478741
GO:0045736	negative regulation of cyclin-dependent protein serine/threonine kinase activity	Regulatory Process	0.00544287
GO:0080037	negative regulation of cytokinin-activated signaling pathway	Regulatory Process	0.00586228
GO:1902386	glycyrrhetinate biosynthetic process	Secondary Metabolism	0.00594606
GO:1902382	11-oxo-beta-amyrin catabolic process	Secondary Metabolism	0.00574103
GO:0080142	regulation of salicylic acid biosynthetic process	Secondary Metabolism	0.00610866
GO:0010888	negative regulation of lipid storage	Regulatory Process	0.00658695
GO:0080183	response to photooxidative stress	Defense/Stress Response	0.00987096
GO:0009696	salicylic acid metabolic process	Secondary Metabolism	0.0208204
GO:0032436	positive regulation of proteasomal ubiquitin-dependent protein catabolic process	Secondary Metabolism	0.0215606
GO:0033353	S-adenosylmethionine cycle	Regulatory Process	0.021588
GO:0042178	xenobiotic catabolic process	Secondary Metabolism	0.0270709
GO:0006297	nucleotide-excision repair DNA gap filling	DNA Repair	0.0343423
GO:0042855	eugenol biosynthetic process	Secondary Metabolism	0.0336992

## Sheet: Table S5
Table S5. Species-specific orthogroups in C. arabica, C. canephora, and C. eugenioides
*NA indicates no significant match in the database
Orthogroup ID	UniProt.Hit	Pfam.Hit	Gene count
			C. canephora	C. eugenioides	C. arabica
OG07381	NA*	Retrotrans_gag;PF03732.20	0	0	33
OG13550	NA	Retrotrans_gag;PF03732.20	0	0	22
OG14813	NA	Retrotrans_gag;PF03732.20^Ty3_capsid;PF19259.2^RVP_2;PF08284.14	0	0	15
OG16671	NA	Transposase_24;PF03004.17^DUF4218;PF13960.9	0	0	8
OG16678	NA	Retrotrans_gag;PF03732.20^Ty3_capsid;PF19259.2	0	0	8
OG16682	MTEF4_ARATH;Transcription termination factor MTERF4 chloroplastic {ECO:0000305}	mTERF;PF02536.17	0	0	8
OG17261	GL114_ARATH;Germin-like protein subfamily 1 member 14	Cupin_1;PF00190.25^Cupin_2;PF07883.14	0	0	7
OG17291	NA	NA	0	0	7
OG17329	PYL9_ARATH;Abscisic acid receptor PYL9	Polyketide_cyc2;PF10604.12	0	0	7
OG17966	ALL9_OLEEU;Glucan endo-13-beta-D-glucosidase	Glyco_hydro_17;PF00332.21	0	0	6
OG18000	NA	MULE;PF10551.12^DBD_Tnp_Mut;PF03108.18	0	0	6
OG18001	NA	RVT_3;PF13456.9	0	0	6
OG18014	PHR2_ARATH;Blue-light photoreceptor PHR2	DNA_photolyase;PF00875.21	0	0	6
OG18025	NA	SWIM;PF04434.20^MULE;PF10551.12	0	0	6
OG18056	NA	SWIM;PF04434.20^MULE;PF10551.12^DBD_Tnp_Mut;PF03108.18	0	0	6
OG18827	M1250_ARATH;Uncharacterized mitochondrial protein AtMg01250	RVT_1;PF00078.30	0	0	5
OG18828	TRPC_PARMW;Indole-3-glycerol phosphate synthase {ECO:0000255|HAMAP-Rule:MF_00134}	IGPS;PF00218.24	0	0	5
OG18873	FRS5_ARATH;Protein FAR1-RELATED SEQUENCE 5	MULE;PF10551.12^FAR1;PF03101.18	0	0	5
OG18885	NA	Helitron_like_N;PF14214.9^PIF1;PF05970.17^AAA_30;PF13604.9	0	0	5
OG18907	POL2_DROME;Retrovirus-related Pol polyprotein from transposon 297	RVT_3;PF13456.9^RT_RNaseH;PF17917.4^RVT_1;PF00078.30^RT_RNaseH_2;PF17919.4	0	0	5
OG18916	Y3475_ARATH;Probable LRR receptor-like serine/threonine-protein kinase At3g47570	LRR_8;PF13855.9^LRR_4;PF12799.10^LRR_1;PF00560.36^ABC1;PF03109.19^LRRNT_2;PF08263.15^PK_Tyr_Ser-Thr;PF07714.20^Pkinase;PF00069.28	0	0	5
OG20094	R1B16_SOLDE;Putative late blight resistance protein homolog R1B-16	NB-ARC;PF00931.25	0	0	4
OG20104	WAKLP_ARATH;Wall-associated receptor kinase-like 15		0	0	4
OG20125	NA	PIF1;PF05970.17^Helitron_like_N;PF14214.9^AAA_30;PF13604.9	0	0	4
OG20168	U71K2_PYRCO;UDP-glycosyltransferase 71K2 {ECO:0000303|Ref.1}	UDPGT;PF00201.21	0	0	4
OG20194	PBL35_ARATH;Serine/threonine-protein kinase PBL35 {ECO:0000303|PubMed:29907700}	Pkinase;PF00069.28^PK_Tyr_Ser-Thr;PF07714.20	0	0	4
OG20197	M310_ARATH;Uncharacterized mitochondrial protein AtMg00310	RVT_1;PF00078.30	0	0	4
OG20210	TATD1_HUMAN;Deoxyribonuclease TATDN1		0	0	4
OG20217	ENDO1_ARATH;Endonuclease 1 {ECO:0000303|PubMed:17651368}	S1-P1_nuclease;PF02265.19	0	0	4
OG20245	NA	DUF4283;PF14111.9^zf-CCHC_4;PF14392.9	0	0	4
OG20250	NA	NA	0	0	4
OG20269	DRL11_ARATH;Probable disease resistance protein RF9	Rx_N;PF18052.4^NB-ARC;PF00931.25	0	0	4
OG20278	75L17_MALDO;Phloretin 4'-O-glucosyltransferase {ECO:0000303|PubMed:27316677}	UDPGT;PF00201.21	0	0	4
OG20291	NA	Retrotrans_gag;PF03732.20	0	0	4
OG20293	RBM42_HUMAN;RNA-binding protein 42		0	0	4
OG20308	GDL87_ARATH;GDSL esterase/lipase At5g55050	Lipase_GDSL;PF00657.25	0	0	4
OG20322	PO21_NASVI;Retrovirus-related Pol polyprotein from type-1 retrotransposable element R2	RVT_1;PF00078.30^DUF4283;PF14111.9^Transposase_21;PF02992.17^RVT_3;PF13456.9^zf-RVT;PF13966.9	0	0	4
OG20328	GH34_ARATH;Indole-3-acetic acid-amido synthetase GH3.4	GH3;PF03321.16	0	0	4
OG20357	NA	NA	0	0	4
OG20376	NA	Retrotrans_gag;PF03732.20	0	0	4
OG20377	NA	DUF883;PF05957.16^ImmE5;PF11480.11^HMW1C_N;PF18071.4	0	0	4
OG20406	FRIGI_ARATH;Protein FRIGIDA {ECO:0000303|PubMed:11030654}	Frigida;PF07899.14	0	0	4
OG22155	NA	zf-RVT;PF13966.9^RVT_3;PF13456.9	0	0	3
OG22165	NA	NA	0	0	3
OG22171	ODD21_ORYSJ;2-oxoglutarate-dependent dioxygenase 21 chloroplastic {ECO:0000303|PubMed:25728912}	DIOX_N;PF14226.9^2OG-FeII_Oxy;PF03171.23	0	0	3
OG22176	NA	SWIM;PF04434.20	0	0	3
OG22181	NA	NA	0	0	3
OG22189	BCP_PETHY;Blue copper protein {ECO:0000303|PubMed:25971550}	Cu_bind_like;PF02298.20	0	0	3
OG22204	CLSY3_ARATH;SNF2 domain-containing protein CLASSY 3	SNF2-rel_dom;PF00176.26	0	0	3
OG22213	NA	NA	0	0	3
OG22225	MNS2_ARATH;Mannosyl-oligosaccharide 12-alpha-mannosidase MNS2	Glyco_hydro_47;PF01532.23	0	0	3
OG22237	ADH1_ARATH;Alcohol dehydrogenase class-P {ECO:0000305}	ADH_N;PF08240.15	0	0	3
OG22240	NA	NA	0	0	3
OG22244	R1C3_SOLDE;Putative late blight resistance protein homolog R1C-3	NB-ARC;PF00931.25	0	0	3
OG22260	NA	PIF1;PF05970.17	0	0	3
OG22279	NA	NA	0	0	3
OG22280	SUVH6_ARATH;Histone-lysine N-methyltransferase H3 lysine-9 specific SUVH6	SAD_SRA;PF02182.20	0	0	3
OG22281	NA	NA	0	0	3
OG22282	NA	NA	0	0	3
OG22286	SOT14_ARATH;Cytosolic sulfotransferase 14	Sulfotransfer_1;PF00685.30	0	0	3
OG22292	NA	RVT_1;PF00078.30^zf-RVT;PF13966.9	0	0	3
OG22293	LOV1C_ARATH;Inactive disease susceptibility protein LOV1	NB-ARC;PF00931.25	0	0	3
OG22294	NA	NA	0	0	3
OG22299	PIF1_XENLA;ATP-dependent DNA helicase PIF1 {ECO:0000255|HAMAP-Rule:MF_03176}	PIF1;PF05970.17	0	0	3
OG22304	LORF2_HUMAN;LINE-1 retrotransposable element ORF2 protein	RVT_1;PF00078.30	0	0	3
OG22311	NA	Retrotrans_gag;PF03732.20^Ty3_capsid;PF19259.2	0	0	3
OG22326	FRS5_ARATH;Protein FAR1-RELATED SEQUENCE 5	MULE;PF10551.12	0	0	3
OG22339	POL5_DROME;Retrovirus-related Pol polyprotein from transposon opus	RT_RNaseH;PF17917.4^RT_RNaseH_2;PF17919.4^RVT_3;PF13456.9	0	0	3
OG22354	NA	NA	0	0	3
OG22357	U70G2_CROXC;Myricetin 3-O-rhamnoside 12-glucosyltransferase UGT709G2	UDPGT;PF00201.21	0	0	3
OG22384	NA	zf-RVT;PF13966.9^RVT_3;PF13456.9^RVT_1;PF00078.30	0	0	3
OG22397	NA	DBD_Tnp_Mut;PF03108.18^MULE;PF10551.12	0	0	3
OG22402	TM2R_SOLLC;ToMV resistance protein Tm-2(GCR236) {ECO:0000303|PubMed:14558663}	NB-ARC;PF00931.25	0	0	3
OG22431	CHMU_TRIPA;Chorismate mutase {ECO:0000303|PubMed:26579090}		0	0	3
OG22460	NA	FBA_1;PF07734.16	0	0	3
OG22465	NA	NA	0	0	3
OG22524	DRL7_ARATH;Probable disease resistance protein At1g58390	NB-ARC;PF00931.25	0	0	3
OG22525	FB115_ARATH;F-box protein At2g21930	F-box;PF00646.36^FBA_1;PF07734.16^F-box-like;PF12937.10^FBA_3;PF08268.15	0	0	3
OG22560	GL52_ORYSJ;Germin-like protein 5-1	Cupin_1;PF00190.25	0	0	3
OG25583	NA	Dirigent;PF03018.17	0	0	2
OG25584	GUN5_ARATH;Endoglucanase 5	Glyco_hydro_9;PF00759.22	0	0	2
OG25588	FB65_ARATH;Putative F-box protein At1g58310		0	0	2
OG25589	SDF2_MOUSE;Stromal cell-derived factor 2	MIR;PF02815.22	0	0	2
OG25593	PLIP1_ARATH;Phospholipase A1 PLIP1 chloroplastic {ECO:0000305}		0	0	2
OG25595	NA	NA	0	0	2
OG25600	NA	SRF-TF;PF00319.21	0	0	2
OG25604	NA	NA	0	0	2
OG25605	MOCOS_SOLLC;Molybdenum cofactor sulfurase {ECO:0000255|HAMAP-Rule:MF_03050}		0	0	2
OG25607	NA	NA	0	0	2
OG25608	NA	Retrotrans_gag;PF03732.20	0	0	2
OG25609	NA	DUF4283;PF14111.9	0	0	2
OG25610	PPR85_ARATH;Pentatricopeptide repeat-containing protein At1g59720 chloroplastic/mitochondrial {ECO:0000305}	PPR;PF01535.23^PPR_2;PF13041.9^PPR_1;PF12854.10^PPR_3;PF13812.9^PPR_long;PF17177.7	0	0	2
OG25616	NA	NA	0	0	2
OG25618	PTR35_ARATH;Protein NRT1/ PTR FAMILY 4.2	PTR2;PF00854.24	0	0	2
OG25624	NA	NA	0	0	2
OG25627	NA	NA	0	0	2
OG25628	H2AV_DROME;Histone H2A.v	Histone;PF00125.27^Histone_H2A_C;PF16211.8	0	0	2
OG25630	NA	NA	0	0	2
OG25632	NA	NA	0	0	2
OG25635	PP285_ARATH;Pentatricopeptide repeat-containing protein At3g57430 chloroplastic	PPR_2;PF13041.9^PPR_3;PF13812.9^PPR_1;PF12854.10^PPR;PF01535.23	0	0	2
OG25637	PAK2_MOUSE;Serine/threonine-protein kinase PAK 2	Pkinase;PF00069.28^PK_Tyr_Ser-Thr;PF07714.20	0	0	2
OG25646	NA	Self-incomp_S1;PF05938.14	0	0	2
OG25649	RU2A_ARATH;U2 small nuclear ribonucleoprotein A'		0	0	2
OG25650	NA	NA	0	0	2
OG25651	Y5457_ARATH;Probable LRR receptor-like serine/threonine-protein kinase At5g45780	PK_Tyr_Ser-Thr;PF07714.20^Pkinase;PF00069.28	0	0	2
OG25652	RP8HA_ARATH;Disease resistance protein RPH8A	NB-ARC;PF00931.25	0	0	2
OG25655	NA	LRR_8;PF13855.9^LRR_4;PF12799.10	0	0	2
OG25675	LRR5_MAIZE;Disease resistance protein BAK6 {ECO:0000305}	LRR_4;PF12799.10^LRR_8;PF13855.9^LRRNT_2;PF08263.15	0	0	2
OG25676	CATA_SOLAP;Catalase	Catalase;PF00199.22	0	0	2
OG25686	NA	NA	0	0	2
OG25688	NA	NA	0	0	2
OG25698	NA	PIF1;PF05970.17	0	0	2
OG25714	NA	NA	0	0	2
OG25718	NA	NA	0	0	2
OG25719	E2FF_ARATH;E2F transcription factor-like E2FF	E2F_TDP;PF02319.23	0	0	2
OG25720	NA	NA	0	0	2
OG25721	REP_ARATH;Rab escort protein 1 {ECO:0000305}		0	0	2
OG25723	POL5_DROME;Retrovirus-related Pol polyprotein from transposon opus	RVT_1;PF00078.30^RVT_3;PF13456.9	0	0	2
OG25724	NA	NA	0	0	2
OG25728	NA	PIF1;PF05970.17	0	0	2
OG25729	DSLE_ARATH;Zinc finger BED domain-containing protein DAYSLEEPER	Dimer_Tnp_hAT;PF05699.17^DUF4413;PF14372.9	0	0	2
OG25731	NA	RVT_1;PF00078.30^zf-RVT;PF13966.9	0	0	2
OG25751	SOT10_ARATH;Cytosolic sulfotransferase 10	Sulfotransfer_1;PF00685.30	0	0	2
OG25754	TF2H4_HUMAN;General transcription factor IIH subunit 4	Tfb2_C;PF18307.4^Tfb2;PF03849.17	0	0	2
OG25758	UBQ4_ARATH;Polyubiquitin 4	ubiquitin;PF00240.26^Ubiquitin_2;PF14560.9^Rad60-SLD;PF11976.11	0	0	2
OG25759	NA	NA	0	0	2
OG25767	NA	NA	0	0	2
OG25768	TBL20_ARATH;Protein trichome birefringence-like 20	PC-Esterase;PF13839.9^PMR5N;PF14416.9	0	0	2
OG25771	DJC17_RAT;DnaJ homolog subfamily C member 17	DnaJ;PF00226.34	0	0	2
OG25772	PME8_ARATH;Probable pectinesterase 8	Pectinesterase;PF01095.22	0	0	2
OG25773	DRL7_ARATH;Probable disease resistance protein At1g58390	Rx_N;PF18052.4^NB-ARC;PF00931.25	0	0	2
OG25775	NA	NA	0	0	2
OG25779	DRL3_ARATH;Probable disease resistance protein At1g15890		0	0	2
OG25780	RL28A_SCHPO;Large ribosomal subunit protein uL15A {ECO:0000305}	Ribosomal_L27A;PF00828.22	0	0	2
OG25781	NA	DUF4283;PF14111.9	0	0	2
OG25786	T3O_CATRO;Tabersonine 3-oxygenase {ECO:0000303|PubMed:25918424}	p450;PF00067.25	0	0	2
OG25789	XA21_ORYSJ;Receptor kinase-like protein Xa21 {ECO:0000303|PubMed:22735448}	LRR_4;PF12799.10^LRR_8;PF13855.9^LRR_6;PF13516.9^LRR_1;PF00560.36^LRRNT_2;PF08263.15	0	0	2
OG25795	NA	NA	0	0	2
OG25798	NA	NA	0	0	2
OG25799	RP8L2_ARATH;Probable disease resistance RPP8-like protein 2	NB-ARC;PF00931.25^Rx_N;PF18052.4	0	0	2
OG25800	M1250_ARATH;Uncharacterized mitochondrial protein AtMg01250	RVT_1;PF00078.30^zf-RVT;PF13966.9	0	0	2
OG25803	GUN18_ORYSJ;Endoglucanase 18	Glyco_hydro_9;PF00759.22	0	0	2
OG25805	IF2_SYNPW;Translation initiation factor IF-2 {ECO:0000255|HAMAP-Rule:MF_00100}	GTP_EFTU;PF00009.30^MMR_HSR1;PF01926.26	0	0	2
OG25810	NA	NA	0	0	2
OG25811	NA	NA	0	0	2
OG25813	NA	NA	0	0	2
OG25814	PP167_ARATH;Pentatricopeptide repeat-containing protein At2g21090	PPR;PF01535.23^PPR_2;PF13041.9^PPR_1;PF12854.10^PPR_3;PF13812.9^E_motif;PF20431.1	0	0	2
OG25816	NA	NA	0	0	2
OG25818	NA	NA	0	0	2
OG25819	JOX4_ARATH;Jasmonate-induced oxygenase 4 {ECO:0000303|PubMed:28559313}	DIOX_N;PF14226.9^2OG-FeII_Oxy;PF03171.23	0	0	2
OG25821	NA	NA	0	0	2
OG25822	NA	NA	0	0	2
OG25825	NA	DUF4283;PF14111.9	0	0	2
OG25826	PULR_MENPI;(+)-pulegone reductase	ADH_N_2;PF16884.8^ADH_zinc_N;PF00107.29	0	0	2
OG25838	NA	PIF1;PF05970.17	0	0	2
OG25842	NA	NA	0	0	2
OG25849	RNHX1_ARATH;Putative ribonuclease H protein At1g65750	zf-RVT;PF13966.9^RVT_3;PF13456.9	0	0	2
OG25850	RGA2_SOLBU;Disease resistance protein RGA2	NB-ARC;PF00931.25	0	0	2
OG25851	NA	NA	0	0	2
OG25852	GH315_ARATH;Indole-3-acetic acid-amido synthetase GH3.15 {ECO:0000303|PubMed:12036261}	GH3;PF03321.16	0	0	2
OG25859	CXE7_ARATH;Probable carboxylesterase 7		0	0	2
OG25866	NA	NA	0	0	2
OG25868	NA	NA	0	0	2
OG25871	NA	NA	0	0	2
OG25878	R1A3_SOLDE;Putative late blight resistance protein homolog R1A-3	NB-ARC;PF00931.25	0	0	2
OG25879	C76C2_ARATH;Cytochrome P450 76C2	p450;PF00067.25	0	0	2
OG25888	RPP13_ARATH;Disease resistance protein RPP13	NB-ARC;PF00931.25	0	0	2
OG25889	DRL11_ARATH;Probable disease resistance protein RF9	NB-ARC;PF00931.25	0	0	2
OG25891	NA	NA	0	0	2
OG25894	RL23A_DAUCA;Large ribosomal subunit protein uL23 {ECO:0000305}	Ribosomal_L23;PF00276.23^Ribosomal_L23eN;PF03939.16	0	0	2
OG25898	C71BE_SINHE;Desmethyl-deoxy-podophyllotoxin synthase {ECO:0000303|PubMed:26359402}	p450;PF00067.25	0	0	2
OG25900	DOX1_PERHD;Drimenol monooxygenase {ECO:0000305}	p450;PF00067.25	0	0	2
OG25902	NA	F-box;PF00646.36^FBA_1;PF07734.16	0	0	2
OG25904	NA	NA	0	0	2
OG25910	NA	RVT_1;PF00078.30	0	0	2
OG25931	NA	PIF1;PF05970.17	0	0	2
OG25935	P2C66_ARATH;Probable protein phosphatase 2C 66		0	0	2
OG25942	PSRK_ARATH;Putative inactive G-type lectin S-receptor-like serine/threonine-protein kinase SRK	S_locus_glycop;PF00954.23^B_lectin;PF01453.27	0	0	2
OG25943	NA	NA	0	0	2
OG25945	NA	Gamma-thionin;PF00304.23	0	0	2
OG25948	NA	NA	0	0	2
OG25950	FAP3_ARATH;Fatty-acid-binding protein 3 chloroplastic	Chalcone;PF02431.18	0	0	2
OG25953	NA	NA	0	0	2
OG25961	AT2B1_CHICK;Plasma membrane calcium-transporting ATPase 1 {ECO:0000250|UniProtKB:P20020}	E1-E2_ATPase;PF00122.23^Hydrolase;PF00702.29^Cation_ATPase;PF13246.9^Cation_ATPase_N;PF00690.29^Cation_ATPase_C;PF00689.24	0	0	2
OG25962	LORF2_MOUSE;LINE-1 retrotransposable element ORF2 protein	DUF4283;PF14111.9	0	0	2
OG25971	NA	NA	0	0	2
OG25977	NA	NA	0	0	2
OG26022	NA	NA	0	0	2
OG26030	NA	DUF247;PF03140.18	0	0	2
OG26033	NA	Rx_N;PF18052.4	0	0	2
OG26036	DMP1_ARATH;Protein DMP1 {ECO:0000303|PubMed:20712629}	DUF679;PF05078.15	0	0	2
OG26037	NA	DUF1517;PF07466.14	0	0	2
OG26041	R1B13_SOLDE;Putative late blight resistance protein homolog R1B-13	NB-ARC;PF00931.25	0	0	2
OG26042	NA	NA	0	0	2
OG26050	LRK14_ARATH;Putative L-type lectin-domain containing receptor kinase I.4	Lectin_legB;PF00139.22	0	0	2
OG26058	NA	NA	0	0	2
OG26063	RL282_ARATH;Large ribosomal subunit protein eL28y {ECO:0000303|PubMed:36423343}	Ribosomal_L28e;PF01778.20	0	0	2
OG26065	NA	NA	0	0	2
OG26066	CPR1_ARATH;F-box protein CPR1		0	0	2
OG26083	NA	NA	0	0	2
OG26094	NA	NA	0	0	2
OG26097	ANGS_PASSA;Angelicin synthase {ECO:0000303|PubMed:19098286}	p450;PF00067.25	0	0	2
OG26098	NA	B_lectin;PF01453.27	0	0	2
OG26114	NA	NA	0	0	2
OG26122	RSH1C_ARATH;Putative GTP diphosphokinase RSH1 chloroplastic	HD_4;PF13328.9^HD;PF01966.25	0	0	2
OG15687	NA	NA	11	0	0
OG15978	CYQ32_CATRO;Cytochrome P450 81Q32 {ECO:0000303|PubMed:24710322}	p450;PF00067.25	10	0	0
OG16294	UBIQ_WHEAT;Ubiquitin	ubiquitin;PF00240.26	9	0	0
OG16296	NA	NA	9	0	0
OG16298	PSD1A_ARATH;26S proteasome non-ATPase regulatory subunit 1 homolog A		9	0	0
OG16766	RL9_RAT;Large ribosomal subunit protein uL6 {ECO:0000305}		8	0	0
OG16768	PCBER_PINTA;Phenylcoumaran benzylic ether reductase PT1 {ECO:0000303|PubMed:10066819}	NmrA;PF05368.16^NAD_binding_10;PF13460.9^Epimerase;PF01370.24^GDP_Man_Dehyd;PF16363.8	8	0	0
OG16770	AB2A_ARATH;ABC transporter A family member 2	ABC2_membrane_3;PF12698.10^ABC_tran;PF00005.30	8	0	0
OG17366	BSK8_ARATH;Serine/threonine-protein kinase BSK8 {ECO:0000305}		7	0	0
OG17368	RL17_PODCA;Large ribosomal subunit protein uL22 {ECO:0000305}	Ribosomal_L22;PF00237.22^PAE;PF03283.16^C2;PF00168.33^NUDIX;PF00293.31	7	0	0
OG17369	PSA_ORYSJ;Puromycin-sensitive aminopeptidase		7	0	0
OG18101	Y5830_ARATH;Probable inactive receptor kinase At5g58300		6	0	0
OG18102	PP315_ARATH;Pentatricopeptide repeat-containing protein At4g16470	PPR;PF01535.23^PPR_2;PF13041.9	6	0	0
OG18115	NA	NA	6	0	0
OG19051	TCPH_TETPY;T-complex protein 1 subunit eta	Cpn60_TCP1;PF00118.27^ubiquitin;PF00240.26	5	0	0
OG19053	KITH_ORYSJ;Thymidine kinase	TK;PF00265.21	5	0	0
OG19054	RISB_SPIOL;67-dimethyl-8-ribityllumazine synthase chloroplastic	DMRL_synthase;PF00885.22	5	0	0
OG19058	XK2_ARATH;Xylulose kinase 2 {ECO:0000303|PubMed:16920870}		5	0	0
OG19059	VILI3_ARATH;Villin-3 {ECO:0000303|PubMed:10631247}		5	0	0
OG19064	NA	NA	5	0	0
OG19066	PERK9_ARATH;Proline-rich receptor-like protein kinase PERK9	Pkinase;PF00069.28^PK_Tyr_Ser-Thr;PF07714.20	5	0	0
OG19070	SYPM_ARATH;Proline--tRNA ligase chloroplastic/mitochondrial {ECO:0000305}	HGTP_anticodon;PF03129.23	5	0	0
OG20543	CAMK1_ORYSJ;Calcium/calmodulin-dependent serine/threonine-protein kinase 1		4	0	0
OG20545	NA	NA	4	0	0
OG20546	NA	NA	4	0	0
OG20549	NA	Helitron_like_N;PF14214.9^Not1;PF04054.18	4	0	0
OG20551	HD16N_ORYSJ;Casein kinase 1-like protein HD16 {ECO:0000305}		4	0	0
OG20553	NEPRN_NEPVE;Protein neprosin {ECO:0000303|PubMed:27481162}	Neprosin;PF03080.18^Neprosin_AP;PF14365.9	4	0	0
OG20568	SIP2_ORYSJ;Signal peptide peptidase 2	Peptidase_A22B;PF04258.16	4	0	0
OG22632	NA	NA	3	0	0
OG22633	DPH2_ASPFU;2-(3-amino-3-carboxypropyl)histidine synthase subunit 2 {ECO:0000305}	Diphthamide_syn;PF01866.20	3	0	0
OG22634	EF2_NEUCR;Elongation factor 2		3	0	0
OG22635	PPIL2_ARATH;Peptidyl-prolyl cis-trans isomerase CYP65 {ECO:0000305}		3	0	0
OG22638	NA	NA	3	0	0
OG22639	RS9_RHIME;Small ribosomal subunit protein uS9 {ECO:0000255|HAMAP-Rule:MF_00532}	Ribosomal_S9;PF00380.22	3	0	0
OG22640	NA	NA	3	0	0
OG22641	DUS12_RAT;Dual specificity protein phosphatase 12	DSPc;PF00782.23	3	0	0
OG22644	NA	NA	3	0	0
OG22646	NA	NA	3	0	0
OG22647	NA	TPX2;PF06886.14	3	0	0
OG22651	AAP8_ARATH;Amino acid permease 8	Aa_trans;PF01490.21	3	0	0
OG22653	AXS1_ARATH;UDP-D-apiose/UDP-D-xylose synthase 1		3	0	0
OG22655	NA	NA	3	0	0
OG22656	NA	NA	3	0	0
OG22657	RL4A_ARATH;Large ribosomal subunit protein uL4z {ECO:0000303|PubMed:36423343}		3	0	0
OG22658	NIK3_ARATH;Protein NSP-INTERACTING KINASE 3	PK_Tyr_Ser-Thr;PF07714.20^Pkinase;PF00069.28	3	0	0
OG22659	FTSHC_ARATH;ATP-dependent zinc metalloprotease FTSH 12 chloroplastic	Peptidase_M41;PF01434.21	3	0	0
OG22660	NA	NA	3	0	0
OG22661	GRID2_MOUSE;Glutamate receptor ionotropic delta-2	SBP_bac_3;PF00497.23^ANF_receptor;PF01094.31^Lig_chan;PF00060.29^Lig_chan-Glu_bd;PF10613.12	3	0	0
OG22663	NA	NA	3	0	0
OG22664	RS27A_SOLLC;Ubiquitin-ribosomal protein eS31 fusion protein {ECO:0000305}	ubiquitin;PF00240.26	3	0	0
OG22665	SALAT_PAPSO;Salutaridinol 7-O-acetyltransferase {ECO:0000303|PubMed:11404355}	Transferase;PF02458.18	3	0	0
OG22666	RS10A_ORYSJ;Small ribosomal subunit protein eS10z {ECO:0000305}	S10_plectin;PF03501.18	3	0	0
OG22667	AVT3A_ARATH;Amino acid transporter AVT3A {ECO:0000305}	Aa_trans;PF01490.21	3	0	0
OG22668	NA	NA	3	0	0
OG22671	NA	NA	3	0	0
OG22677	PGML1_ARATH;Phosphoglycerate mutase-like protein 1 {ECO:0000305}	Pkinase;PF00069.28^PK_Tyr_Ser-Thr;PF07714.20	3	0	0
OG22680	DXR_ARATH;1-deoxy-D-xylulose 5-phosphate reductoisomerase chloroplastic	DXP_redisom_C;PF08436.15^DXPR_C;PF13288.9^DXP_reductoisom;PF02670.19	3	0	0
OG22681	NA	NA	3	0	0
OG22683	NA	NA	3	0	0
OG22684	NA	NA	3	0	0
OG22685	MYB7_ARATH;Transcription factor MYB7 {ECO:0000305}		3	0	0
OG22686	NA	NA	3	0	0
OG22688	BIP2_ORYSJ;Heat shock 70 kDa protein BIP2 {ECO:0000305}	HSP70;PF00012.23^MreB_Mbl;PF06723.16	3	0	0
OG22695	PDI53_ARATH;Protein disulfide-isomerase 5-3	Glyco_hydro_47;PF01532.23	3	0	0
OG22699	NA	NA	3	0	0
OG22702	SUI1_SPOST;Protein translation factor SUI1 homolog	SUI1;PF01253.25	3	0	0
OG22709	NA	NA	3	0	0
OG22710	PEX12_ARATH;Peroxisome biogenesis protein 12 {ECO:0000305}		3	0	0
OG26228	NA	NA	2	0	0
OG26229	NA	NA	2	0	0
OG26230	NA	NA	2	0	0
OG26231	EFR_ARATH;LRR receptor-like serine/threonine-protein kinase EFR {ECO:0000303|PubMed:16713565}	LRR_8;PF13855.9^LRR_6;PF13516.9^LRRNT_2;PF08263.15	2	0	0
OG26232	C7A11_ARATH;Cytochrome P450 72A11	p450;PF00067.25	2	0	0
OG26233	AVT1J_ARATH;Amino acid transporter AVT1J {ECO:0000305}	Aa_trans;PF01490.21	2	0	0
OG26234	SKA1_ORYSI;Spindle and kinetochore-associated protein 1 homolog	SKA1;PF07160.15	2	0	0
OG26235	NA	NA	2	0	0
OG26236	MAX2A_PETHY;F-box/LRR-repeat MAX2 homolog A		2	0	0
OG26237	NA	NA	2	0	0
OG26238	MRP3_RAT;ATP-binding cassette sub-family C member 3	ABC_membrane;PF00664.26^ABC_tran;PF00005.30	2	0	0
OG26239	UB2E2_HUMAN;Ubiquitin-conjugating enzyme E2 E2	UQ_con;PF00179.29	2	0	0
OG26242	PP315_ARATH;Pentatricopeptide repeat-containing protein At4g16470		2	0	0
OG26243	SC5D2_ARATH;Putative Delta(7)-sterol-C5(6)-desaturase 2		2	0	0
OG26244	DCAF7_DICDI;DDB1- and CUL4-associated factor 7 homolog		2	0	0
OG26247	AAE1_ARATH;Butanoate--CoA ligase AAE1 {ECO:0000305|PubMed:23300257}		2	0	0
OG26249	NA	NA	2	0	0
OG26250	NA	Rx_N;PF18052.4	2	0	0
OG26251	RL7_RAT;Large ribosomal subunit protein uL30 {ECO:0000305}	Ribosomal_L30;PF00327.23	2	0	0
OG26253	PDI22_ORYSJ;Protein disulfide isomerase-like 2-2	Thioredoxin;PF00085.23	2	0	0
OG26254	NA	NA	2	0	0
OG26255	RRT2_ARATH;Rhamnogalacturonan I rhamnosyltransferase 1 {ECO:0000303|PubMed:30082766}	O-FucT;PF10250.12	2	0	0
OG26257	PURU1_ARATH;Formyltetrahydrofolate deformylase 1 mitochondrial	Formyl_trans_N;PF00551.22	2	0	0
OG26258	NA	NA	2	0	0
OG26259	U76E2_ARATH;UDP-glycosyltransferase 76E2	UDPGT;PF00201.21	2	0	0
OG26260	Y5371_ARATH;Probable LRR receptor-like serine/threonine-protein kinase At5g63710		2	0	0
OG26261	KSGT_BRANA;Shaggy-related protein kinase theta		2	0	0
OG26262	NA	NA	2	0	0
OG26263	NA	NA	2	0	0
OG26264	NA	NA	2	0	0
OG26265	RH16_ORYSJ;DEAD-box ATP-dependent RNA helicase 16		2	0	0
OG26266	SUS_VIGRR;Sucrose synthase	Sucrose_synth;PF00862.22	2	0	0
OG26267	ACBP4_ARATH;Acyl-CoA-binding domain-containing protein 4	Kelch_4;PF13418.9^Kelch_6;PF13964.9^Kelch_5;PF13854.9^Kelch_1;PF01344.28^Kelch_3;PF13415.9^Kelch_2;PF07646.18	2	0	0
OG26271	XTH34_POPPZ;Xyloglucan endotransglucosylase protein 34 {ECO:0000305}	Glyco_hydro_16;PF00722.24	2	0	0
OG26272	NA	NA	2	0	0
OG26273	ARL2_DICDI;ADP-ribosylation factor-like protein 2	Arf;PF00025.24	2	0	0
OG26275	NA	NA	2	0	0
OG26276	BUB1_ARATH;Mitotic checkpoint serine/threonine-protein kinase BUB1		2	0	0
OG26277	Y4230_ARATH;G-type lectin S-receptor-like serine/threonine-protein kinase At4g03230	Pkinase;PF00069.28	2	0	0
OG26278	NA	NA	2	0	0
OG26280	NA	NA	2	0	0
OG26282	SF3A2_BOVIN;Splicing factor 3A subunit 2	zf-met;PF12874.10	2	0	0
OG26284	GFAT1_ARATH;Glutamine--fructose-6-phosphate aminotransferase [isomerizing] 1 {ECO:0000303|PubMed:30775776}		2	0	0
OG26285	NA	NA	2	0	0
OG26286	NA	NA	2	0	0
OG26287	NA	NA	2	0	0
OG26288	NA	NA	2	0	0
OG26289	API5_ORYSJ;Apoptosis inhibitor 5-like protein API5	API5;PF05918.14	2	0	0
OG26290	API5_ORYSJ;Apoptosis inhibitor 5-like protein API5	API5;PF05918.14	2	0	0
OG26292	RL23A_TOBAC;Large ribosomal subunit protein uL23 {ECO:0000305}	Ribosomal_L23eN;PF03939.16	2	0	0
OG26293	NA	NA	2	0	0
OG26294	NA	NA	2	0	0
OG26295	MYB4_ORYSJ;Transcription factor MYB4 {ECO:0000305}		2	0	0
OG26297	DOF2_ORYSJ;Dof zinc finger protein 2 {ECO:0000305}	zf-Dof;PF02701.18	2	0	0
OG26298	PATL4_ARATH;Patellin-4		2	0	0
OG26302	ARGB_GLOVI;Acetylglutamate kinase {ECO:0000255|HAMAP-Rule:MF_00082}	AA_kinase;PF00696.31	2	0	0
OG26303	VTE7_ARATH;Alpha/beta hydrolase domain-containing protein VTE7 {ECO:0000305}		2	0	0
OG26305	NA	NA	2	0	0
OG26306	NA	NA	2	0	0
OG26307	NA	NA	2	0	0
OG26309	DBR2_ARTAN;Artemisinic aldehyde Delta(11(13)) reductase {ECO:0000303|PubMed:18495659}	Oxidored_FMN;PF00724.23	2	0	0
OG26310	NA	NA	2	0	0
OG26319	NA	NA	2	0	0
OG26323	NA	NA	2	0	0
OG26329	NA	NA	2	0	0
OG26330	SYP_ROSCS;Proline--tRNA ligase {ECO:0000255|HAMAP-Rule:MF_01571}		2	0	0
OG26331	AB24B_ARATH;ABC transporter B family member 24 mitochondrial		2	0	0
OG26333	AB18B_ARATH;ABC transporter B family member 18	ABC_membrane;PF00664.26	2	0	0
OG26336	MCM2_DROME;DNA replication licensing factor Mcm2	MCM_lid;PF17855.4^MCM;PF00493.26	2	0	0
OG26340	NA	NA	2	0	0
OG26341	NA	NA	2	0	0
OG26343	NA	NA	2	0	0
OG26344	NA	NA	2	0	0
OG26345	RADL4_ARATH;Protein RADIALIS-like 4	Myb_DNA-binding;PF00249.34^Myb_DNA-bind_6;PF13921.9	2	0	0
OG26347	HPSE1_ARATH;Heparanase-like protein 1		2	0	0
OG26349	DR206_PEA;Disease resistance response protein 206		2	0	0
OG26351	NA	NA	2	0	0
OG26354	PCNA_BOVIN;Proliferating cell nuclear antigen	PCNA_C;PF02747.18^PCNA_N;PF00705.21	2	0	0
OG26355	H32_CHLRE;Histone H3 type 2	Histone;PF00125.27	2	0	0
OG26356	NA	NA	2	0	0
OG26359	NA	NA	2	0	0
OG26361	XA21_ORYSI;Receptor kinase-like protein Xa21 {ECO:0000303|Ref.1}	LRR_8;PF13855.9^LRR_4;PF12799.10^Pkinase;PF00069.28^PK_Tyr_Ser-Thr;PF07714.20	2	0	0
OG26372	NA	NA	2	0	0
OG26374	ZEP1_ORYSJ;Synaptonemal complex protein ZEP1 {ECO:0000305}		2	0	0
OG26382	TCR1_ECOLX;Tetracycline resistance protein class A	MFS_1;PF07690.19	2	0	0
OG26385	RUS2_ARATH;Protein root UVB sensitive 2 chloroplastic {ECO:0000303|PubMed:19515790}		2	0	0
OG26386	NA	NA	2	0	0
OG26387	SEC8_ARATH;Exocyst complex component SEC8		2	0	0
OG26411	RPO1N_THEAC;DNA-directed RNA polymerase subunit Rpo1N {ECO:0000255|HAMAP-Rule:MF_00863}	RNA_pol_Rpb1_1;PF04997.15	2	0	0
OG26412	WTR7_ARATH;WAT1-related protein At1g43650	EamA;PF00892.23	2	0	0
OG26415	C05AK_ARATH;Cytochrome P450 705A22 {ECO:0000303|PubMed:23284057}	p450;PF00067.25	2	0	0
OG26416	NA	NA	2	0	0
OG26417	PHB2_DICDI;Prohibitin-2	Band_7;PF01145.28	2	0	0
OG26430	AB23G_ARATH;ABC transporter G family member 23	ABC2_membrane;PF01061.27	2	0	0
OG15016	NA	NA	0	14	0
OG15975	NA	Helitron_like_N;PF14214.9^PIF1;PF05970.17^AAA_30;PF13604.9	0	10	0
OG17359	PPR39_ARATH;Pentatricopeptide repeat-containing protein At1g12775 mitochondrial	PPR_2;PF13041.9^PPR;PF01535.23^PPR_1;PF12854.10^PPR_3;PF13812.9^PPR_long;PF17177.7^MRP-S27;PF10037.12^TPR_19;PF14559.9^ATP13;PF12921.10	0	7	0
OG18092	NA	Retrotrans_gag;PF03732.20	0	6	0
OG18093	PURU1_ARATH;Formyltetrahydrofolate deformylase 1 mitochondrial		0	6	0
OG18095	NA	Retrotrans_gag;PF03732.20	0	6	0
OG19037	NA	Retrotrans_gag;PF03732.20	0	5	0
OG19044	NA	NA	0	5	0
OG19049	DRL13_ARATH;Putative disease resistance protein At1g59780	LRR_8;PF13855.9^LRR_4;PF12799.10^NB-ARC;PF00931.25	0	5	0
OG20516	NA	NA	0	4	0
OG20521	M1250_ARATH;Uncharacterized mitochondrial protein AtMg01250	RVT_1;PF00078.30^zf-RVT;PF13966.9	0	4	0
OG20523	DGR2_ARATH;Protein DUF642 L-GALACTONO-14-LACTONE-RESPONSIVE GENE 2 {ECO:0000303|PubMed:22323769}	DUF642;PF04862.15	0	4	0
OG20525	NA	FAR1;PF03101.18	0	4	0
OG20531	NA	MULE;PF10551.12^DBD_Tnp_Mut;PF03108.18	0	4	0
OG20533	R1B19_SOLDE;Putative late blight resistance protein homolog R1B-19	NB-ARC;PF00931.25^NB-LRR;PF12061.11	0	4	0
OG22579	NA	NA	0	3	0
OG22581	NA	NA	0	3	0
OG22587	XA21_ORYSI;Receptor kinase-like protein Xa21 {ECO:0000303|Ref.1}	LRR_8;PF13855.9^LRR_4;PF12799.10^LRR_1;PF00560.36^Pkinase;PF00069.28^PK_Tyr_Ser-Thr;PF07714.20^LRRNT_2;PF08263.15	0	3	0
OG22588	NAC55_ARATH;NAC domain-containing protein 55	NAM;PF02365.18	0	3	0
OG22590	RP8L4_ARATH;Probable disease resistance RPP8-like protein 4	LRR_8;PF13855.9^NB-ARC;PF00931.25	0	3	0
OG22592	ACA7_ARATH;Putative calcium-transporting ATPase 7 plasma membrane-type	CaATP_NAI;PF12515.11	0	3	0
OG22593	NA	NA	0	3	0
OG22594	NA	NA	0	3	0
OG22598	POL_MLVCB;Gag-Pol polyprotein	rve;PF00665.29^RT_RNaseH_2;PF17919.4^RVT_3;PF13456.9^RVT_1;PF00078.30^RT_RNaseH;PF17917.4^Integrase_H2C2;PF17921.4	0	3	0
OG22599	NA	DSPc;PF00782.23	0	3	0
OG22600	NA	GrpE;PF01025.22	0	3	0
OG22610	NA	NA	0	3	0
OG22615	NA	NA	0	3	0
OG22617	DIOX1_RUTGR;Bi-functional coumaroyl CoA and feruloyl CoA ortho-hydroxylase Diox1 {ECO:0000303|PubMed:22168819}	2OG-FeII_Oxy;PF03171.23	0	3	0
OG22623	NA	NA	0	3	0
OG22630	NA	NA	0	3	0
OG26127	NA	NA	0	2	0
OG26131	NA	NA	0	2	0
OG26133	XA21_ORYSJ;Receptor kinase-like protein Xa21 {ECO:0000303|PubMed:22735448}	LRR_8;PF13855.9^LRR_4;PF12799.10^LRR_1;PF00560.36^Pkinase;PF00069.28^PK_Tyr_Ser-Thr;PF07714.20^p450;PF00067.25	0	2	0
OG26137	NA	NA	0	2	0
OG26141	MCA1B_ASPOR;Metacaspase-1B	Peptidase_C14;PF00656.25	0	2	0
OG26142	NA	NA	0	2	0
OG26143	RPP8_ARATH;Disease resistance protein RPP8	LRR_4;PF12799.10^LRR_8;PF13855.9^Rx_N;PF18052.4^NB-ARC;PF00931.25	0	2	0
OG26144	NA	Organ_specific;PF10950.11	0	2	0
OG26145	AHP3_ARATH;Histidine-containing phosphotransfer protein 3	Hpt;PF01627.26	0	2	0
OG26146	F6H21_IPOBA;Bi-functional coumaroyl CoA and feruloyl CoA ortho-hydroxylase F6H2-1-1 {ECO:0000303|PubMed:22169019}	2OG-FeII_Oxy;PF03171.23	0	2	0
OG26147	DRL17_ARATH;Probable disease resistance protein At1g61300	NB-ARC;PF00931.25	0	2	0
OG26150	BGL47_ARATH;Beta-glucosidase 47 {ECO:0000303|PubMed:15604686}	Glyco_hydro_1;PF00232.21	0	2	0
OG26151	ROC6_ORYSJ;Homeobox-leucine zipper protein ROC6	START;PF01852.22	0	2	0
OG26154	NA	NA	0	2	0
OG26158	MBR1_ARATH;E3 ubiquitin-protein ligase MBR1	zf-rbx1;PF12678.10^zf-RING_2;PF13639.9	0	2	0
OG26159	NA	NA	0	2	0
OG26160	R1B14_SOLDE;Putative late blight resistance protein homolog R1B-14	NB-ARC;PF00931.25^NB-LRR;PF12061.11^Oxidored_FMN;PF00724.23	0	2	0
OG26161	FRS10_ARATH;Putative protein FAR1-RELATED SEQUENCE 10	MULE;PF10551.12	0	2	0
OG26162	NA	F-box;PF00646.36	0	2	0
OG26163	R1B11_SOLDE;Putative late blight resistance protein homolog R1B-11		0	2	0
OG26165	R1B14_SOLDE;Putative late blight resistance protein homolog R1B-14	NB-LRR;PF12061.11^NB-ARC;PF00931.25	0	2	0
OG26166	R13L3_ARATH;Putative disease resistance RPP13-like protein 3	NB-LRR;PF12061.11^Rx_N;PF18052.4^NB-ARC;PF00931.25	0	2	0
OG26167	NA	Cnn_1N;PF07989.14	0	2	0
OG26168	BH036_ARATH;Transcription factor bHLH36	HLH;PF00010.29	0	2	0
OG26173	PRU1_PRUAV;Major allergen Pru av 1	Bet_v_1;PF00407.22	0	2	0
OG26179	CPR1_ARATH;F-box protein CPR1	F-box-like;PF12937.10^Retrotrans_gag;PF03732.20^F-box;PF00646.36	0	2	0
OG26180	NA	zf-C3HC4_2;PF13923.9^zf-C3HC4;PF00097.28^zf-RING_2;PF13639.9^zf-RING_11;PF17123.8^zf-rbx1;PF12678.10	0	2	0
OG26184	NA	PIF1;PF05970.17	0	2	0
OG26185	NA	NA	0	2	0
OG26186	NA	NA	0	2	0
OG26188	NA	NA	0	2	0
OG26193	WAKLG_ARATH;Wall-associated receptor kinase-like 8	LRR_4;PF12799.10^LRR_8;PF13855.9^LRR_1;PF00560.36^Pkinase;PF00069.28^PK_Tyr_Ser-Thr;PF07714.20	0	2	0
OG26194	Y1154_ARATH;Probable serine/threonine-protein kinase At1g01540	LRR_4;PF12799.10^LRR_8;PF13855.9^LRR_1;PF00560.36^Pkinase;PF00069.28^PK_Tyr_Ser-Thr;PF07714.20	0	2	0
OG26204	SDEH3_ARATH;Senescence/dehydration-associated protein At3g51250 {ECO:0000305}		0	2	0
OG26205	R1A3_SOLDE;Putative late blight resistance protein homolog R1A-3	NB-LRR;PF12061.11^NB-ARC;PF00931.25	0	2	0
OG26206	SMD3_DROME;Small nuclear ribonucleoprotein Sm D3	LSM;PF01423.25	0	2	0
OG26207	NA	NA	0	2	0
OG26209	GSTU3_ARATH;Glutathione S-transferase U3	GST_N;PF02798.23^GST_C_2;PF13410.9	0	2	0
OG26214	PIKS2_ORYSJ;Disease resistance protein Piks-2 {ECO:0000305}	Rx_N;PF18052.4^NB-ARC;PF00931.25^AAA_16;PF13191.9	0	2	0
OG26216	RP8L3_ARATH;Disease resistance RPP8-like protein 3	LRR_8;PF13855.9^LRR_4;PF12799.10	0	2	0

## Sheet: Table S6
Table S6. Enriched GO biological processes for unassigned genes in C. eugenioides
GO ID	GO Term	FDR
GO:0009955	adaxial/abaxial pattern specification	0.026168
GO:1900426	positive regulation of defense response to bacterium	0.0301946
GO:0006880	intracellular sequestering of iron ion	0.0311666

## Sheet: Table S7
Table S7. Rapidly evolving gene families (expansion or contraction) in the Coffea-lineage
*CAFE5 family-wide P-value
#NA indicates no significant match in the database
Orthogroup ID	Expansion/Contraction	Number of genes			P-value*	UniProt.Hit	Pfam.Hit
		C. canephora	C. eugenioides	C. arabica
OG00043	expansion	61	72	70	5.27256e-18	Y3471_ARATH;Putative receptor-like protein kinase At3g47110	LRR_8;PF13855.9^LRR_4;PF12799.10^LRR_1;PF00560.36^PK_Tyr_Ser-Thr;PF07714.20^Pkinase;PF00069.28^LRRNT_2;PF08263.15^LRR_6;PF13516.9^ABC1;PF03109.19
OG00494	expansion	58	16	36	2.56238e-14	RGA2_SOLBU;Disease resistance protein RGA2	LRR_8;PF13855.9^NB-ARC;PF00931.25^Rx_N;PF18052.4
OG00151	expansion	36	25	50	1.19715e-13	RPP13_ARATH;Disease resistance protein RPP13	NB-ARC;PF00931.25^Rx_N;PF18052.4^LRR_4;PF12799.10^LRR_8;PF13855.9
OG00203	expansion	45	26	37	2.69298e-12	R13L1_ARATH;Putative disease resistance RPP13-like protein 1	LRR_4;PF12799.10^LRR_8;PF13855.9^NB-ARC;PF00931.25^Rx_N;PF18052.4
OG00172	expansion	29	64	42	5.45332e-10	EIX1_SOLLC;Receptor-like protein EIX1 {ECO:0000305}	LRR_4;PF12799.10^LRR_8;PF13855.9^LRR_1;PF00560.36^LRR_6;PF13516.9^LRRNT_2;PF08263.15
OG00334	expansion	21	34	16	3.5618e-09	DRL3_ARATH;Probable disease resistance protein At1g15890	NB-ARC;PF00931.25^LRR_8;PF13855.9^AAA_22;PF13401.9^NACHT;PF05729.15
OG00081	expansion	27	49	36	3.81384e-09	DRL31_ARATH;Putative disease resistance protein At5g05400	LRR_4;PF12799.10^LRR_8;PF13855.9^NB-ARC;PF00931.25^ATPase_2;PF01637.21^AAA_22;PF13401.9
OG00223	expansion	28	36	42	9.83196e-09	LRK44_ARATH;L-type lectin-domain containing receptor kinase IV.4 {ECO:0000303|PubMed:19773388}	Lectin_legB;PF00139.22^Pkinase;PF00069.28^PK_Tyr_Ser-Thr;PF07714.20
OG00085	expansion	4	63	97	5.25826e-08	C76AD_BETVU;Cytochrome P450 76AD1 {ECO:0000303|PubMed:22660548}	RVT_3;PF13456.9^zf-RVT;PF13966.9
OG00109	expansion	31	36	31	5.72935e-08	RGA3_SOLBU;Putative disease resistance protein RGA3	LRR_4;PF12799.10^LRR_8;PF13855.9^NB-ARC;PF00931.25^Rx_N;PF18052.4^LRR_1;PF00560.36^Nucleoporin2;PF04096.17
OG00057	expansion	29	44	48	9.56469e-08	Y3475_ARATH;Probable LRR receptor-like serine/threonine-protein kinase At3g47570	LRR_4;PF12799.10^LRR_8;PF13855.9^LRR_1;PF00560.36^LRRNT_2;PF08263.15^LRR_6;PF13516.9
OG00164	expansion	26	29	42	1.66235e-07	DRL4_ARATH;Putative disease resistance protein At1g50180	NB-ARC;PF00931.25^Rx_N;PF18052.4^LRR_8;PF13855.9^LRR_4;PF12799.10
OG00194	expansion	22	32	39	1.84696e-07	YAKC_SCHPO;Aldo-keto reductase yakc [NADP(+)]	Aldo_ket_red;PF00248.24
OG01091	expansion	9	26	26	3.99009e-07	NA#	Ank;PF00023.33^Ank_2;PF12796.10^Ank_5;PF13857.9^Ank_3;PF13606.9^Ank_4;PF13637.9^PGG;PF13962.9
OG01092	expansion	29	11	17	4.34097e-07	NLP4_ARATH;Protein NLP4	RWP-RK;PF02042.18^PB1;PF00564.27
OG00042	expansion	0	98	91	8.63333e-07	POL3_DROME;Retrovirus-related Pol polyprotein from transposon 17.6	Retrotrans_gag;PF03732.20
OG00285	expansion	0	69	56	8.90605e-07	RNH_HALSA;Ribonuclease HI	RT_RNaseH_2;PF17919.4^RVT_3;PF13456.9^RVT_1;PF00078.30^RT_RNaseH;PF17917.4^rve;PF00665.29^RNase_H;PF00075.27^Retrotrans_gag;PF03732.20^Integrase_H2C2;PF17921.4
OG00308	expansion	17	16	31	1.23603e-06	LERK1_ORYSJ;G-type lectin S-receptor-like serine/threonine-protein kinase LECRK1 {ECO:0000305}	B_lectin;PF01453.27^Pkinase;PF00069.28^PK_Tyr_Ser-Thr;PF07714.20^S_locus_glycop;PF00954.23^ABC1;PF03109.19
OG00035	expansion	37	41	58	2.2081e-06	CA225_CATRO;Cytochrome P450 72A225 {ECO:0000303|PubMed:24710322}	p450;PF00067.25
OG00039	expansion	0	83	83	2.59551e-06	YI31B_YEAST;Transposon Ty3-I Gag-Pol polyprotein	Retrotrans_gag;PF03732.20^RT_RNaseH_2;PF17919.4^RT_RNaseH;PF17917.4^RVT_1;PF00078.30^Integrase_H2C2;PF17921.4^Ty3_capsid;PF19259.2^rve;PF00665.29
OG00072	expansion	24	40	40	2.91195e-06	CRK25_ARATH;Cysteine-rich receptor-like protein kinase 25	Stress-antifung;PF01657.20^PK_Tyr_Ser-Thr;PF07714.20^Pkinase;PF00069.28^ABC1;PF03109.19
OG00441	expansion	7	30	32	7.88656e-06	FB79_ARATH;Putative F-box protein At1g67623	NA
OG01012	expansion	17	11	20	9.8039e-06	RD22_ARATH;BURP domain protein RD22 {ECO:0000303|PubMed:9790599}	BURP;PF03181.18
OG00573	expansion	0	39	63	1.30102e-05	NA	NA
OG03169	expansion	13	10	19	2.32734e-05	DRL36_ARATH;Probable disease resistance protein At5g45510	LRR_4;PF12799.10^LRR_8;PF13855.9^NB-ARC;PF00931.25^LRR_5;PF13306.9
OG00337	expansion	0	58	46	2.32734e-05	FRS12_ARATH;Protein FAR1-RELATED SEQUENCE 12	MULE;PF10551.12^FAR1;PF03101.18
OG00216	expansion	16	21	30	2.33748e-05	C92C6_MAIZE;Trimethyltridecatetraene synthase {ECO:0000303|PubMed:27662898}	p450;PF00067.25
OG00411	expansion	15	16	33	2.65483e-05	RFA1B_ORYSJ;Replication protein A 70 kDa DNA-binding subunit B	Rep_fac-A_C;PF08646.13^REPA_OB_2;PF16900.8
OG01018	expansion	13	18	23	2.72559e-05	CBPR_HEVBR;Citrate-binding protein	Alginate_lyase2;PF08787.14
OG00305	expansion	13	16	22	2.72559e-05	C79D3_LOTJA;Isoleucine N-monooxygenase 1	p450;PF00067.25
OG00170	expansion	12	48	15	2.72559e-05	RGA3_SOLBU;Putative disease resistance protein RGA3	LRR_4;PF12799.10^LRR_8;PF13855.9^NB-ARC;PF00931.25^Rx_N;PF18052.4
OG00110	expansion	19	31	28	3.66266e-05	OMT3_HUMLU;Probable O-methyltransferase 3 {ECO:0000303|PubMed:18223037}	Methyltransf_2;PF00891.21^Dimerisation;PF08100.14
OG01057	expansion	0	39	36	4.1564e-05	FRS10_ARATH;Putative protein FAR1-RELATED SEQUENCE 10	MULE;PF10551.12^FAR1;PF03101.18
OG00171	expansion	0	37	39	4.1564e-05	AUR2_ARATH;Serine/threonine-protein kinase Aurora-2	Retrotrans_gag;PF03732.20
OG00186	expansion	19	20	22	4.73258e-05	Y3720_ARATH;UPF0481 protein At3g47200	DUF247;PF03140.18
OG00253	expansion	12	23	30	6.96068e-05	GRP1_TOBAC;Glycine-rich protein	GRP;PF07172.14
OG00088	expansion	14	29	53	8.61083e-05	GL118_ARATH;Germin-like protein subfamily 1 member 18	Cupin_1;PF00190.25^Cupin_2;PF07883.14
OG00105	expansion	20	26	40	0.000132123	U74C1_ARATH;UDP-glycosyltransferase 74C1	UDPGT;PF00201.21
OG00089	expansion	23	22	33	0.000132123	SCPL2_ARATH;Serine carboxypeptidase-like 2	Peptidase_S10;PF00450.25^Peptidase_S9;PF00326.24
OG03122	expansion	8	14	5	0.000132786	NA	NA
OG00165	expansion	14	20	27	0.00014675	DIOX2_PAPSO;Protopine O-dealkylase {ECO:0000303|PubMed:23928311}	2OG-FeII_Oxy;PF03171.23^DIOX_N;PF14226.9
OG00029	expansion	33	45	70	0.00017974	C7D55_HYOMU;Premnaspirodiene oxygenase	p450;PF00067.25
OG00424	expansion	9	11	26	0.000198303	BAD1_ARATH;Ankyrin repeat-containing protein BDA1 {ECO:0000305}	Ank_3;PF13606.9^Ank_5;PF13857.9^Ank_4;PF13637.9^Ank_2;PF12796.10^Ank;PF00023.33^PGG;PF13962.9
OG00217	expansion	18	21	26	0.000199212	CHIA_TOBAC;Acidic endochitinase	Glyco_hydro_18;PF00704.31
OG00445	expansion	12	12	16	0.000203899	U83A1_ARATH;UDP-glycosyltransferase 83A1	UDPGT;PF00201.21
OG00022	expansion	27	35	54	0.000259632	R1A10_SOLDE;Putative late blight resistance protein homolog R1A-10	NB-ARC;PF00931.25^Rx_N;PF18052.4^Arm;PF00514.26
OG00192	expansion	16	19	32	0.000270738	CCR1_PETHY;Cinnamoyl-CoA reductase 1 {ECO:0000303|PubMed:24985707 ECO:0000303|PubMed:25217505}	Epimerase;PF01370.24^3Beta_HSD;PF01073.22^NAD_binding_4;PF07993.15^NAD_binding_10;PF13460.9^GDP_Man_Dehyd;PF16363.8^NmrA;PF05368.16
OG00235	expansion	26	30	47	0.00027981	R1A6_SOLDE;Putative late blight resistance protein homolog R1A-6	NB-ARC;PF00931.25^NB-LRR;PF12061.11^Rx_N;PF18052.4^AAA_16;PF13191.9^AAA_22;PF13401.9^AAA_14;PF13173.9^LRR_4;PF12799.10
OG00044	expansion	20	20	22	0.000413458	EIX2_SOLLC;Receptor-like protein EIX2 {ECO:0000305}	LRR_4;PF12799.10^LRR_8;PF13855.9^LRR_1;PF00560.36^LRR_6;PF13516.9^LRRNT_2;PF08263.15
OG01328	expansion	0	29	36	0.000424214	NA	NA
OG02107	expansion	0	37	24	0.000424214	NA	Retrotrans_gag;PF03732.20^Ty3_capsid;PF19259.2
OG13280	expansion	10	2	9	0.000424214	REP_BGYMV;Replication-associated protein	Gemini_AL1;PF00799.23^Gemini_AL1_M;PF08283.14
OG01840	expansion	6	9	14	0.000424214	NA	NA
OG02771	expansion	7	5	17	0.000424214	U75C1_SOLLC;UDP-glycosyltransferase 75C1 {ECO:0000303|PubMed:28482127}	UDPGT;PF00201.21
OG00102	expansion	22	25	31	0.000481591	UGT2_GARJA;7-deoxyloganetin glucosyltransferase	UDPGT;PF00201.21
OG00060	expansion	4	54	70	0.000515642	PLY11_ARATH;Putative pectate lyase 11	DUF4283;PF14111.9^zf-CCHC_4;PF14392.9
OG00026	expansion	11	37	78	0.000515642	RAB14_PIG;Ras-related protein Rab-14	DDE_Tnp_4;PF13359.9^Plant_tran;PF04827.17^DDE_Tnp_1;PF01609.24
OG00427	expansion	0	36	61	0.000546634	NA	Retrotrans_gag;PF03732.20
OG00756	expansion	10	12	24	0.000546634	VLG_ARATH;Protein VACUOLELESS GAMETOPHYTES {ECO:0000303|PubMed:28107777}	C1_2;PF03107.19^C1_1;PF00130.25^PHD;PF00628.32
OG01544	expansion	13	1	10	0.000570856	TMVRN_NICGU;TMV resistance protein N	LRR_4;PF12799.10^LRR_8;PF13855.9^NB-ARC;PF00931.25^C-JID;PF20160.2^TIR;PF01582.23^TIR_2;PF13676.9^AAA_16;PF13191.9^NACHT;PF05729.15
OG00250	expansion	1	28	49	0.000570856	RSLE1_ORYSJ;Zinc finger BED domain-containing protein RICESLEEPER 1	DUF4413;PF14372.9^Dimer_Tnp_hAT;PF05699.17^PPR_2;PF13041.9
OG00222	expansion	16	17	22	0.000630615	AER_ARATH;NADPH-dependent oxidoreductase 2-alkenal reductase {ECO:0000303|PubMed:16299173}	ADH_zinc_N;PF00107.29^ADH_N_2;PF16884.8^ADH_zinc_N_2;PF13602.9
OG00120	expansion	14	22	23	0.000630615	9DC3_SOLPI;Receptor-like protein 9DC3 {ECO:0000312|EMBL:AAT77550.1}	LRR_4;PF12799.10^LRR_8;PF13855.9^LRR_1;PF00560.36^LRR_6;PF13516.9^LRRNT_2;PF08263.15
OG00074	expansion	6	39	73	0.000747173	RSLE2_ORYSJ;Zinc finger BED domain-containing protein RICESLEEPER 2	DUF4413;PF14372.9^Dimer_Tnp_hAT;PF05699.17^zf-BED;PF02892.18
OG00255	expansion	18	21	27	0.000794513	BGL12_ORYSI;Beta-glucosidase 12 {ECO:0000305}	Glyco_hydro_1;PF00232.21
OG00077	expansion	16	28	25	0.000794513	XB35_ORYSJ;Probable E3 ubiquitin-protein ligase XBOS35	Ank_2;PF12796.10^Ank_4;PF13637.9^Ank_5;PF13857.9^PGG;PF13962.9^Ank_3;PF13606.9^Ank;PF00023.33^DUF4219;PF13961.9
OG01076	expansion	19	9	15	0.000862609	C81Q2_SESRA;(+)-piperitol/(+)-sesamin synthase CYP81Q2 {ECO:0000305}	p450;PF00067.25
OG00133	expansion	8	26	27	0.000862609	RGA2_SOLBU;Disease resistance protein RGA2	LRR_4;PF12799.10^LRR_8;PF13855.9^NB-ARC;PF00931.25^Rx_N;PF18052.4^AAA_16;PF13191.9
OG00282	expansion	3	29	56	0.00114529	POLR1_ARATH;Retrovirus-related Pol polyprotein from transposon RE1	DUF659;PF04937.18^Dimer_Tnp_hAT;PF05699.17^zf-BED;PF02892.18
OG00417	expansion	8	23	25	0.00114529	EGS2_CLABR;Eugenol synthase 2 {ECO:0000303|PubMed:18208524}	NmrA;PF05368.16^NAD_binding_10;PF13460.9^Epimerase;PF01370.24^GDP_Man_Dehyd;PF16363.8^Sacchrp_dh_NADP;PF03435.21
OG00175	expansion	11	11	23	0.00114529	LERK4_ORYSI;G-type lectin S-receptor-like serine/threonine-protein kinase LECRK4 {ECO:0000305}	B_lectin;PF01453.27^PK_Tyr_Ser-Thr;PF07714.20^Pkinase;PF00069.28
OG00082	expansion	0	35	66	0.00114529	TF29_SCHPO;Transposon Tf2-9 polyprotein	RVT_3;PF13456.9^RT_RNaseH;PF17917.4^RT_RNaseH_2;PF17919.4^RVT_1;PF00078.30^rve;PF00665.29^Integrase_H2C2;PF17921.4^RNase_H;PF00075.27
OG01614	expansion	2	16	37	0.00135525	FAR1_ARATH;Protein FAR-RED IMPAIRED RESPONSE 1	FAR1;PF03101.18^MULE;PF10551.12
OG03600	expansion	5	6	22	0.00135525	CE101_ARATH;G-type lectin S-receptor-like serine/threonine-protein kinase CES101	Pkinase;PF00069.28^PK_Tyr_Ser-Thr;PF07714.20^B_lectin;PF01453.27^ABC1;PF03109.19^DUF3403;PF11883.11^CAP;PF00188.29^LysM;PF01476.23
OG00985	expansion	1	21	27	0.00135525	ZMYM1_HUMAN;Zinc finger MYM-type protein 1	DUF4371;PF14291.9^Dimer_Tnp_hAT;PF05699.17^LRR_8;PF13855.9^LRR_4;PF12799.10
OG02102	expansion	10	8	15	0.00144122	SSL8_ARATH;Protein STRICTOSIDINE SYNTHASE-LIKE 8 {ECO:0000303|PubMed:10777701}	Str_synth;PF03088.19^SGL;PF08450.15
OG00762	expansion	9	12	19	0.00144122	BH025_ARATH;Transcription factor bHLH25	HLH;PF00010.29
OG01083	expansion	11	9	15	0.00144122	BSPA_POPDE;Bark storage protein A	PNP_UDP_1;PF01048.23
OG01231	expansion	12	6	12	0.00144122	AMI4G_ARATH;Probable amidase At4g34880 {ECO:0000305}	Amidase;PF01425.24
OG00505	expansion	10	8	14	0.00144122	GAOX3_ARATH;Gibberellin 20 oxidase 3 {ECO:0000305|PubMed:7630935}	2OG-FeII_Oxy;PF03171.23^DIOX_N;PF14226.9
OG01398	expansion	1	27	37	0.00162352	NA	MULE;PF10551.12^SWIM;PF04434.20^DBD_Tnp_Mut;PF03108.18
OG00055	expansion	19	41	49	0.001825	C7317_PRUMU;Cytochrome P450 736A117 {ECO:0000303|PubMed:25015725}	p450;PF00067.25
OG00204	expansion	11	18	18	0.00202834	GDL16_ARATH;GDSL esterase/lipase At1g31550	Lipase_GDSL;PF00657.25
OG00207	expansion	13	12	23	0.00202834	PTR32_ARATH;Protein NRT1/ PTR FAMILY 1.1	PTR2;PF00854.24^MFS_1;PF07690.19
OG00153	expansion	11	17	21	0.00202834	ACD6_ARATH;Protein ACCELERATED CELL DEATH 6 {ECO:0000303|PubMed:10488236}	Ank_3;PF13606.9^Ank;PF00023.33^Ank_5;PF13857.9^Ank_2;PF12796.10^Ank_4;PF13637.9^PGG;PF13962.9
OG00238	expansion	14	15	34	0.00237943	MIRA_SYNDU;Miraculin	Kunitz_legume;PF00197.21
OG00187	expansion	13	16	32	0.00237943	Y1465_ARATH;Late embryogenesis abundant protein At1g64065 {ECO:0000305}	LEA_2;PF03168.16
OG00218	expansion	24	5	13	0.00237943	PPP7L_ARATH;Serine/threonine-protein phosphatase 7 long form homolog	PMD;PF10536.12
OG00069	expansion	17	21	41	0.00254108	FRA16_FRAAN;Major strawberry allergen Fra a 1.06 {ECO:0000305}	Bet_v_1;PF00407.22
OG00772	expansion	9	14	22	0.0028019	CXE1_PAPSO;3-O-acetylpapaveroxine carboxylesterase CXE1 {ECO:0000305}	Abhydrolase_3;PF07859.16^BD-FAE;PF20434.1^Say1_Mug180;PF10340.12
OG00511	expansion	11	9	19	0.0028019	SD25_ARATH;G-type lectin S-receptor-like serine/threonine-protein kinase SD2-5	B_lectin;PF01453.27^PK_Tyr_Ser-Thr;PF07714.20^Pkinase;PF00069.28^PAN_2;PF08276.14
OG00405	expansion	14	9	11	0.0028019	SCP34_ARATH;Serine carboxypeptidase-like 34	Peptidase_S10;PF00450.25
OG00333	expansion	9	22	48	0.00414761	RFA1B_ORYSJ;Replication protein A 70 kDa DNA-binding subunit B	REPA_OB_2;PF16900.8^Rep_fac-A_C;PF08646.13
OG02115	expansion	0	19	39	0.00432964	NA	NA
OG03749	expansion	0	23	17	0.00432964	NA	Transposase_24;PF03004.17^Transposase_23;PF03017.17
OG05059	expansion	2	14	20	0.00432964	NA	Transposase_24;PF03004.17
OG05905	expansion	5	4	9	0.00432964	TPS3_LITCU;Alpha-thujene synthase TPS3 chloroplastic {ECO:0000303|Ref.1}	Terpene_synth_C;PF03936.19^Terpene_syn_C_2;PF19086.3^Terpene_synth;PF01397.24
OG00684	expansion	5	5	9	0.00432964	FDL10_ARATH;F-box/FBD/LRR-repeat protein At1g78750	FBD;PF08387.13^F-box;PF00646.36
OG00131	expansion	15	17	35	0.00434962	UFOG6_FRAAN;UDP-glucose flavonoid 3-O-glucosyltransferase 6 {ECO:0000303|PubMed:18487633}	UDPGT;PF00201.21
OG00075	expansion	12	32	28	0.00434962	TPS32_SOLLC;Viridiflorene synthase {ECO:0000303|PubMed:21813655}	Terpene_synth_C;PF03936.19^Terpene_syn_C_2;PF19086.3^Terpene_synth;PF01397.24
OG01156	expansion	9	2	9	0.00454711	LEA1_CICAR;Late embryogenesis abundant protein 1	NA
OG01534	expansion	8	5	11	0.00454711	RNZ_YEAST;Ribonuclease Z	DUF4220;PF13968.9^DUF594;PF04578.16
OG01925	expansion	7	5	9	0.00454711	DCL2_ARATH;Endoribonuclease Dicer homolog 2	Ribonucleas_3_3;PF14622.9^Ribonuclease_3;PF00636.29^PAZ;PF02170.25^Helicase_C;PF00271.34^Dicer_dimer;PF03368.17^ResIII;PF04851.18^DEAD;PF00270.32
OG00311	expansion	0	25	26	0.00454711	NA	NA
OG00067	expansion	17	25	41	0.00596802	CYT24_CATRO;Cytochrome P450 76T24 {ECO:0000303|PubMed:24710322}	p450;PF00067.25
OG00030	expansion	17	28	43	0.00596802	WAKLG_ARATH;Wall-associated receptor kinase-like 8	EGF_CA;PF07645.18^Pkinase;PF00069.28^PK_Tyr_Ser-Thr;PF07714.20^GUB_WAK_bind;PF13947.9^EGF_3;PF12947.10^cEGF;PF12662.10^EGF;PF00008.30^FXa_inhibition;PF14670.9
OG00535	expansion	10	9	18	0.00668281	PTR29_ARATH;Protein NRT1/ PTR FAMILY 5.5	PTR2;PF00854.24^MFS_1;PF07690.19
OG00150	expansion	14	19	23	0.00761809	SOT14_ARATH;Cytosolic sulfotransferase 14	Sulfotransfer_1;PF00685.30^Sulfotransfer_3;PF13469.9
OG00156	expansion	16	17	18	0.00761809	TRNH_DATST;Tropinone reductase homolog	adh_short_C2;PF13561.9^adh_short;PF00106.28^KR;PF08659.13
OG00389	expansion	10	16	22	0.00765839	C87A3_ORYSJ;Cytochrome P450 87A3	p450;PF00067.25
OG00400	expansion	11	12	24	0.00765839	GLIP5_ARATH;GDSL esterase/lipase 5	Lipase_GDSL;PF00657.25
OG00168	expansion	11	19	16	0.00765839	LAMT_CATRO;Loganic acid O-methyltransferase {ECO:0000303|PubMed:24104568 ECO:0000303|PubMed:29399933}	Methyltransf_7;PF03492.18
OG00059	expansion	1	36	40	0.00765839	FH13_ARATH;Formin-like protein 13	zf-GRF;PF06839.15
OG00309	expansion	14	11	18	0.00790023	U91A1_ARATH;UDP-glycosyltransferase 91A1	UDPGT;PF00201.21
OG00325	expansion	13	14	18	0.00790023	UGT7_CATRO;UDP-glucose iridoid glucosyltransferase	UDPGT;PF00201.21
OG00211	expansion	14	10	19	0.00790023	PLP3_ARATH;Patatin-like protein 3	Patatin;PF01734.25
OG00117	expansion	14	16	29	0.0080768	GSTXA_TOBAC;Probable glutathione S-transferase parA	GST_N;PF02798.23^GST_N_3;PF13417.9^GST_C_2;PF13410.9^GST_N_2;PF13409.9^GST_C;PF00043.28
OG00038	expansion	18	22	36	0.00929399	Y5597_ARATH;Probable receptor-like protein kinase At5g59700	Malectin;PF11721.11^Malectin_like;PF12819.10^Pkinase;PF00069.28^PK_Tyr_Ser-Thr;PF07714.20
OG00557	expansion	8	7	10	0.00938655	C80B3_PAPSO;(S)-N-methylcoclaurine 3'-hydroxylase isozyme 1 {ECO:0000305}	p450;PF00067.25
OG00914	expansion	10	5	10	0.00938655	XDH_CHICK;Xanthine dehydrogenase/oxidase	MoCoBD_2;PF20256.1^MoCoBD_1;PF02738.21^Ald_Xan_dh_C;PF01315.25^FAD_binding_5;PF00941.24^CO_deh_flav_C;PF03450.20^Fer2_2;PF01799.23^Fer2;PF00111.30
OG02257	expansion	6	5	14	0.0124834	RL39_CANAX;Large ribosomal subunit protein eL39 {ECO:0000305}	Ribosomal_L39;PF00832.23
OG02594	expansion	9	0	9	0.0124834	UTP20_HUMAN;Small subunit processome component 20 homolog	DRIM;PF07539.15^DUF6700;PF20416.1
OG01873	expansion	6	4	9	0.0124834	KAO_ORYSJ;Ent-kaurenoic acid oxidase {ECO:0000305}	p450;PF00067.25
OG00918	expansion	7	5	7	0.0124834	FB333_ARATH;Probable F-box protein At4g22030	Chloroplast_duf;PF14476.9
OG00941	expansion	6	5	10	0.0124834	GSTU8_ARATH;Glutathione S-transferase U8	GST_N;PF02798.23^GST_N_2;PF13409.9^GST_N_3;PF13417.9^GST_C;PF00043.28
OG00108	expansion	21	21	29	0.0125074	NEPRN_NEPVE;Protein neprosin {ECO:0000303|PubMed:27481162}	Neprosin;PF03080.18^Neprosin_AP;PF14365.9
OG00087	expansion	19	17	44	0.0125074	DIR23_ARATH;Dirigent protein 23	Dirigent;PF03018.17
OG00241	expansion	13	13	24	0.0130668	PCR3_ARATH;Protein PLANT CADMIUM RESISTANCE 3	PLAC8;PF04749.20
OG00495	expansion	11	8	21	0.0133787	F6H1_ARATH;Feruloyl CoA ortho-hydroxylase 1 {ECO:0000303|PubMed:18547395}	2OG-FeII_Oxy;PF03171.23^DIOX_N;PF14226.9
OG03188	expansion	1	13	17	0.013832	ZMYM1_HUMAN;Zinc finger MYM-type protein 1	Dimer_Tnp_hAT;PF05699.17^DUF4371;PF14291.9
OG03190	expansion	0	13	36	0.013832	RNH_HALSA;Ribonuclease HI	RVT_3;PF13456.9^RT_RNaseH_2;PF17919.4^RT_RNaseH;PF17917.4^RVT_1;PF00078.30^rve;PF00665.29
OG06224	expansion	0	20	15	0.013832	NA	Transposase_21;PF02992.17^Transpos_assoc;PF13963.9^DUF4218;PF13960.9
OG06741	expansion	3	7	8	0.013832	R13L4_ARATH;Disease resistance RPP13-like protein 4	LRR_4;PF12799.10^LRR_8;PF13855.9
OG07907	expansion	4	4	16	0.013832	CYC02_CATRO;CYC02 protein	GRP;PF07172.14
OG11841	expansion	5	2	7	0.013832	RNS4_ANTHI;Ribonuclease S-4	Ribonuclease_T2;PF00445.21
OG13242	expansion	21	0	0	0.013832	POLG_PVCV2;Genome polyprotein	MP;PF01107.21
OG14294	expansion	4	1	9	0.013832	RPM1_ARATH;Disease resistance protein RPM1 {ECO:0000303|PubMed:7638602}	NB-ARC;PF00931.25^Rx_N;PF18052.4^LRR_8;PF13855.9^AAA_16;PF13191.9^Retrotran_gag_2;PF14223.9^AAA_22;PF13401.9
OG14469	expansion	8	3	0	0.013832	RL91_ARATH;Large ribosomal subunit protein uL6z/uL6y {ECO:0000303|PubMed:36423343}	Ribosomal_L6;PF00347.26
OG15217	expansion	4	0	8	0.013832	NA	Rx_N;PF18052.4
OG01015	expansion	2	7	28	0.013832	NA	PMD;PF10536.12
OG01443	expansion	3	7	13	0.013832	Y5838_ARATH;Probably inactive leucine-rich repeat receptor-like protein kinase At5g48380	PK_Tyr_Ser-Thr;PF07714.20^Pkinase;PF00069.28^LRR_4;PF12799.10^LRR_8;PF13855.9^LRRNT_2;PF08263.15
OG02106	expansion	4	4	9	0.013832	DRL12_ARATH;Probable disease resistance protein At1g59620	NB-ARC;PF00931.25^Rx_N;PF18052.4^AAA_16;PF13191.9^AAA_22;PF13401.9
OG02663	expansion	4	3	6	0.013832	EIX2_SOLLC;Receptor-like protein EIX2 {ECO:0000305}	LRR_4;PF12799.10^LRR_8;PF13855.9^LRR_1;PF00560.36^LRR_6;PF13516.9^LRRNT_2;PF08263.15^UPRTase;PF14681.9
OG00166	expansion	11	20	32	0.0201255	GDL8_ARATH;GDSL esterase/lipase At1g28590	Lipase_GDSL;PF00657.25
OG00249	expansion	10	18	18	0.0227572	C81F1_ARATH;Cytochrome P450 81F1 {ECO:0000305}	p450;PF00067.25
OG00134	expansion	12	13	19	0.0227572	C7150_PRUMU;Cytochrome P450 71AU50 {ECO:0000303|PubMed:25015725}	p450;PF00067.25
OG00104	expansion	13	11	21	0.0227572	XYL2_MEDSV;Beta-xylosidase/alpha-L-arabinofuranosidase 2 {ECO:0000303|PubMed:17615411 ECO:0000312|EMBL:ABQ45228.1}	Glyco_hydro_3_C;PF01915.25^Glyco_hydro_3;PF00933.24^Fn3-like;PF14310.9
OG00098	expansion	11	16	17	0.0227572	SBT4_LOTJA;Subtilisin-like protease 4 {ECO:0000303|PubMed:19220794}	Peptidase_S8;PF00082.25^fn3_6;PF17766.4^PA;PF02225.25^Inhibitor_I9;PF05922.19
OG00633	expansion	2	19	20	0.0229314	R23A2_ARATH;Large ribosomal subunit protein uL23y {ECO:0000303|PubMed:36423343}	Ribosomal_L23eN;PF03939.16^Ribosomal_L23;PF00276.23
OG01003	expansion	7	7	12	0.0229314	CBP22_HORVU;Serine carboxypeptidase II-2	Peptidase_S10;PF00450.25
OG00580	expansion	6	8	14	0.0229314	OBL1_TOBAC;Triacylglycerol lipase OBL1 {ECO:0000305}	Lipase_3;PF01764.28^Mbeg1-like;PF11187.11
OG00627	expansion	6	8	9	0.0229314	NA	NA
OG00629	expansion	6	9	13	0.0229314	HIDM_GLYEC;2-hydroxyisoflavanone dehydratase	COesterase;PF00135.31^Abhydrolase_3;PF07859.16^BD-FAE;PF20434.1
OG00680	expansion	7	6	10	0.0229314	TYDC5_PAPSO;Tyrosine/DOPA decarboxylase 5	Pyridoxal_deC;PF00282.22
OG00692	expansion	6	12	10	0.0229314	ACA12_ARATH;Calcium-transporting ATPase 12 plasma membrane-type	Cation_ATPase_C;PF00689.24^E1-E2_ATPase;PF00122.23^Cation_ATPase;PF13246.9^Hydrolase;PF00702.29^Cation_ATPase_N;PF00690.29
OG00086	expansion	11	14	14	0.0240957	F6H_OCIBA;Flavonoid-6-hydroxylase {ECO:0000303|PubMed:23184958}	p450;PF00067.25
OG00073	expansion	5	25	26	0.0240957	NA	DUF659;PF04937.18^Dimer_Tnp_hAT;PF05699.17
OG00064	expansion	15	17	30	0.024982	UGT29_PANGI;UDP-glucosyltransferase 29 {ECO:0000303|PubMed:25769286}	UDPGT;PF00201.21
OG00246	expansion	9	4	15	0.0250593	SOC1_ARATH;MADS-box protein SOC1 {ECO:0000303|PubMed:15805477 ECO:0000303|PubMed:17428825 ECO:0000303|PubMed:18339670}	K-box;PF01486.20^SRF-TF;PF00319.21
OG00220	expansion	7	15	22	0.0253604	PGLR_TOBAC;Polygalacturonase	Glyco_hydro_28;PF00295.20^Pectate_lyase_3;PF12708.10
OG00083	expansion	14	19	22	0.0287518	SAT_CATRO;Stemmadenine O-acetyltransferase {ECO:0000303|PubMed:29511102}	Transferase;PF02458.18
OG01951	expansion	3	15	7	0.0333531	RBM42_XENLA;RNA-binding protein 42	RRM_1;PF00076.25^LRR_4;PF12799.10^LRR_8;PF13855.9^LRR_1;PF00560.36
OG03073	expansion	5	4	11	0.0333531	GSTU9_ARATH;Glutathione S-transferase U9	GST_N_3;PF13417.9^GST_N;PF02798.23^GST_N_2;PF13409.9
OG00984	expansion	2	10	18	0.0333531	FBK67_ARATH;F-box/kelch-repeat protein At3g23880	F-box;PF00646.36^F-box-like;PF12937.10^FBA_1;PF07734.16^FBA_3;PF08268.15
OG01609	expansion	5	4	7	0.0333531	HRT2_HEVBR;Rubber cis-polyprenyltransferase HRT2	Prenyltransf;PF01255.22
OG00983	expansion	4	6	9	0.0333531	DEF19_ARATH;Defensin-like protein 19	Gamma-thionin;PF00304.23
OG01189	expansion	6	3	7	0.0333531	ALKR4_ARATH;Probable aldo-keto reductase 4	Aldo_ket_red;PF00248.24
OG00327	expansion	10	11	18	0.0391928	OPR5_ORYSJ;Putative 12-oxophytodienoate reductase 5	Oxidored_FMN;PF00724.23
OG01383	expansion	6	12	19	0.0440501	Y3264_ARATH;Putative UPF0481 protein At3g02645	DUF247;PF03140.18
OG00406	expansion	0	31	22	0.0440501	NA	Transposase_24;PF03004.17^Transposase_23;PF03017.17^DUF4216;PF13952.9
OG00716	expansion	8	7	14	0.0440501	SSL3_ARATH;Protein STRICTOSIDINE SYNTHASE-LIKE 3 {ECO:0000303|PubMed:10777701}	SGL;PF08450.15^Str_synth;PF03088.19^NHL;PF01436.24^SSL_N;PF20067.2
OG00429	expansion	7	10	11	0.0440501	GRXS6_ARATH;Monothiol glutaredoxin-S6	Glutaredoxin;PF00462.27
OG00252	expansion	3	17	23	0.0440501	CURE1_SOLLC;Cuscuta receptor 1 {ECO:0000303|PubMed:27471302 ECO:0000303|PubMed:33082345}	LRR_4;PF12799.10^LRR_8;PF13855.9^LRR_1;PF00560.36^LRR_6;PF13516.9^LRRNT_2;PF08263.15
OG00293	expansion	7	9	16	0.0440501	PERX_NICSY;Lignin-forming anionic peroxidase	peroxidase;PF00141.26
OG00200	expansion	8	9	14	0.0440501	BBE15_ARATH;Monolignol oxidoreductase AtBBE-like 15 {ECO:0000303|PubMed:26037923}	FAD_binding_4;PF01565.26^BBE;PF08031.15
OG03076	expansion	0	41	7	0.0441895	NA	Transposase_21;PF02992.17^DUF4218;PF13960.9
OG06226	expansion	1	18	10	0.0441895	NA	Transposase_32;PF20167.1
OG09048	expansion	8	2	1	0.0441895	POLG_PVCV2;Genome polyprotein	RT_RNaseH_2;PF17919.4^RT_RNaseH;PF17917.4^RVT_1;PF00078.30
OG09699	expansion	0	13	9	0.0441895	FAR1_ARATH;Protein FAR-RED IMPAIRED RESPONSE 1	MULE;PF10551.12^FAR1;PF03101.18
OG10314	expansion	0	9	18	0.0441895	NA	NA
OG14627	expansion	5	0	2	0.0441895	TPR1_ARATH;Topless-related protein 1	WD40;PF00400.35
OG03307	expansion	3	4	5	0.0441895	TAX1_ARATH;Signaling peptide TAXIMIN 1 {ECO:0000303|PubMed:26071531}	NA
OG03319	expansion	3	3	7	0.0441895	RS29_GRIJA;Small ribosomal subunit protein uS14 {ECO:0000305}	Ribosomal_S14;PF00253.24
OG04968	expansion	3	2	3	0.0441895	C71D7_SOLCH;Cytochrome P450 71D7	p450;PF00067.25
OG05283	expansion	3	1	8	0.0441895	BH168_ARATH;Transcription factor bHLH168 {ECO:0000305}	NA
OG05571	expansion	3	2	7	0.0441895	CHIC_ARATH;Class V chitinase {ECO:0000303|PubMed:22936594}	Glyco_hydro_18;PF00704.31
OG01017	expansion	4	3	3	0.0441895	R13L1_ARATH;Putative disease resistance RPP13-like protein 1	LRR_4;PF12799.10^NB-ARC;PF00931.25^Rx_N;PF18052.4^LRR_8;PF13855.9^AAA_16;PF13191.9
OG00097	contraction	0	0	0	0.0141952	PME3_ARATH;Pectinesterase/pectinesterase inhibitor 3	Myb_DNA-bind_3;PF12776.10
OG01448	contraction	0	0	0	0.0141952	SKP1_PONAB;S-phase kinase-associated protein 1	Transposase_28;PF04195.15
OG00272	contraction	0	0	0	0.0477851	RNG1L_ARATH;E3 ubiquitin-protein ligase RING1-like	zf-RING_2;PF13639.9^zf-rbx1;PF12678.10^zf-RING_11;PF17123.8^zf-C3HC4_2;PF13923.9^zf-C3HC4;PF00097.28^zf-RING_UBOX;PF13445.9^zf-C3HC4_3;PF13920.9^zf-RING_5;PF14634.9^zf-ANAPC11;PF12861.10

## Sheet: Table S8
Table S8. Enriched GO biological processes in rapidly expanded orthogroups of the Coffea-lineage
GO ID	GO Term	FDR	Functional category
GO:0002229	defense response to oomycetes	6.1e-11	Stress/Defense
GO:0002238	response to molecule of fungal origin	2.47e-15	Stress/Defense
GO:0002240	response to molecule of oomycetes origin	0.000137729	Stress/Defense
GO:0002242	defense response to parasitic plant	2.26e-05	Stress/Defense
GO:0002752	cell surface pattern recognition receptor signaling pathway	2.2e-05	Signaling / Regulation
GO:0002768	immune response-regulating cell surface receptor signaling pathway	0.0030205	Stress/Defense
GO:0006032	chitin catabolic process	5.73e-06	Metabolism / Secondary Metabolism
GO:0006749	glutathione metabolic process	3.49e-13	Metabolism / Secondary Metabolism
GO:0007166	cell surface receptor signaling pathway	4.48e-05	Signaling / Regulation
GO:0009164	nucleoside catabolic process	2.16e-07	Metabolism / Secondary Metabolism
GO:0009610	response to symbiotic fungus	3.47e-05	Stress/Defense
GO:0009625	response to insect	0.00224454	Stress/Defense
GO:0009686	gibberellin biosynthetic process	0.000675486	Metabolism / Secondary Metabolism
GO:0009688	abscisic acid biosynthetic process	7.39e-05	Metabolism / Secondary Metabolism
GO:0009751	response to salicylic acid	7.14e-13	Stress/Defense
GO:0009805	coumarin biosynthetic process	6.54e-05	Metabolism / Secondary Metabolism
GO:0009807	lignan biosynthetic process	3.67e-06	Metabolism / Secondary Metabolism
GO:0009820	alkaloid metabolic process	4e-07	Metabolism / Secondary Metabolism
GO:0009866	induced systemic resistance ethylene mediated signaling pathway	3.45e-05	Stress/Defense
GO:0009871	jasmonic acid and ethylene-dependent systemic resistance ethylene mediated signaling pathway	7.51e-07	Stress/Defense
GO:0009992	intracellular water homeostasis	1.22e-06	Transport / Homeostasis
GO:0010017	red or far-red light signaling pathway	2.59e-13	Signaling / Regulation
GO:0010018	far-red light signaling pathway	5.13e-22	Signaling / Regulation
GO:0010077	maintenance of inflorescence meristem identity	0.00940745	Growth and Development
GO:0010218	response to far red light	1.2e-06	Stress/Defense
GO:0010268	brassinosteroid homeostasis	3.26e-10	Transport / Homeostasis
GO:0010359	regulation of anion channel activity	5.92e-07	Signaling / Regulation
GO:0010466	negative regulation of peptidase activity	0.000431155	Signaling / Regulation
GO:0010483	pollen tube reception	2.73e-06	Signaling / Regulation
GO:0010930	negative regulation of auxin mediated signaling pathway	0.000138753	Signaling / Regulation
GO:0015706	nitrate transmembrane transport	0.000519271	Transport / Homeostasis
GO:0016045	detection of bacterium	9.89e-12	Stress/Defense
GO:0016094	polyprenol biosynthetic process	7.26e-07	Metabolism / Secondary Metabolism
GO:0016102	diterpenoid biosynthetic process	0.00385768	Metabolism / Secondary Metabolism
GO:0016132	brassinosteroid biosynthetic process	1.68e-11	Metabolism / Secondary Metabolism
GO:0016135	saponin biosynthetic process	1.26e-09	Metabolism / Secondary Metabolism
GO:0018874	benzoate metabolic process	0.00202615	Metabolism / Secondary Metabolism
GO:0019284	L-methionine salvage from S-adenosylmethionine	4.39e-05	Metabolism / Secondary Metabolism
GO:0019509	L-methionine salvage from methylthioadenosine	3.74e-06	Metabolism / Secondary Metabolism
GO:0019756	cyanogenic glycoside biosynthetic process	8.29e-10	Metabolism / Secondary Metabolism
GO:0030308	negative regulation of cell growth	0.00184152	Signaling / Regulation
GO:0031222	arabinan catabolic process	1.59e-18	Metabolism / Secondary Metabolism
GO:0031408	oxylipin biosynthetic process	1.07e-05	Metabolism / Secondary Metabolism
GO:0032922	circadian regulation of gene expression	0.00378502	Signaling / Regulation
GO:0035835	indole alkaloid biosynthetic process	4.07e-09	Metabolism / Secondary Metabolism
GO:0036377	arbuscular mycorrhizal association	3.41e-13	Stress/Defense
GO:0042753	positive regulation of circadian rhythm	3.99e-18	Signaling / Regulation
GO:0042938	dipeptide transport	2.99e-07	Transport / Homeostasis
GO:0045339	farnesyl diphosphate catabolic process	2.48e-08	Metabolism / Secondary Metabolism
GO:0045493	xylan catabolic process	7.51e-11	Metabolism / Secondary Metabolism
GO:0046246	terpene biosynthetic process	0.00870921	Metabolism / Secondary Metabolism
GO:0046256	2 4 6-trinitrotoluene catabolic process	0.00505188	Metabolism / Secondary Metabolism
GO:0046740	transport of virus in host cell to cell	4.71e-08	Transport / Homeostasis
GO:0048530	fruit morphogenesis	0.00952419	Growth and Development
GO:0051365	cellular response to potassium ion starvation	0.00047642	Stress/Defense
GO:0051762	sesquiterpene biosynthetic process	2.39e-05	Metabolism / Secondary Metabolism
GO:0051923	sulfation	9.93e-09	Signaling / Regulation
GO:0051924	regulation of calcium ion transport	0.00512728	Transport / Homeostasis
GO:0070301	cellular response to hydrogen peroxide	0.00503105	Stress/Defense
GO:0071446	cellular response to salicylic acid stimulus	1.55e-09	Stress/Defense
GO:0071475	cellular hyperosmotic salinity response	2.28e-05	Stress/Defense
GO:0080148	negative regulation of response to water deprivation	0.00227036	Stress/Defense
GO:0097275	intracellular ammonium homeostasis	0.00528504	Transport / Homeostasis
GO:0106146	sideretin biosynthesis	0.00520496	Metabolism / Secondary Metabolism
GO:1900056	negative regulation of leaf senescence	3.95e-13	Signaling / Regulation
GO:1900426	positive regulation of defense response to bacterium	0.000148494	Stress/Defense
GO:1900994	(-)-secologanin biosynthetic process	9.29e-11	Metabolism / Secondary Metabolism
GO:1902290	positive regulation of defense response to oomycetes	0.000274235	Stress/Defense

## Sheet: Table S9
Table S9. Rapidly evolving gene families (expansion or contraction) in C. arabica
*CAFE5 family-wide P-value
#NA indicates no significant match in the database
Orthogroup ID	Expansion/Contraction	Gene count			P-value*	UniProt.Hit	Pfam.Hit
		C. canephora	C. eugenioides	C. arabica
OG00085	expansion	4	63	97	2.0724e-36	C76AD_BETVU;Cytochrome P450 76AD1 {ECO:0000303|PubMed:22660548}	RVT_3;PF13456.9^zf-RVT;PF13966.9
OG00026	expansion	11	37	78	5.97492e-49	RAB14_PIG;Ras-related protein Rab-14	DDE_Tnp_4;PF13359.9^Plant_tran;PF04827.17^DDE_Tnp_1;PF01609.24
OG00074	expansion	6	39	73	1.94036e-39	RSLE2_ORYSJ;Zinc finger BED domain-containing protein RICESLEEPER 2	DUF4413;PF14372.9^Dimer_Tnp_hAT;PF05699.17^zf-BED;PF02892.18
OG00060	expansion	4	54	70	1.16506e-14	PLY11_ARATH;Putative pectate lyase 11	DUF4283;PF14111.9^zf-CCHC_4;PF14392.9
OG00082	expansion	0	35	66	1.48649e-37	TF29_SCHPO;Transposon Tf2-9 polyprotein	RVT_3;PF13456.9^RT_RNaseH;PF17917.4^RT_RNaseH_2;PF17919.4^RVT_1;PF00078.30^rve;PF00665.29^Integrase_H2C2;PF17921.4^RNase_H;PF00075.27
OG00573	expansion	0	39	63	6.17289e-28	NA#	NA
OG00427	expansion	0	36	61	2.49715e-28	NA	Retrotrans_gag;PF03732.20
OG00282	expansion	3	29	56	1.70779e-32	POLR1_ARATH;Retrovirus-related Pol polyprotein from transposon RE1	DUF659;PF04937.18^Dimer_Tnp_hAT;PF05699.17^zf-BED;PF02892.18	guide the stereoselective coupling of phenolic compounds
OG00088	expansion	14	29	53	1.39744e-26	GL118_ARATH;Germin-like protein subfamily 1 member 18	Cupin_1;PF00190.25^Cupin_2;PF07883.14
OG00250	expansion	1	28	49	1.0046e-25	RSLE1_ORYSJ;Zinc finger BED domain-containing protein RICESLEEPER 1	DUF4413;PF14372.9^Dimer_Tnp_hAT;PF05699.17^PPR_2;PF13041.9
OG00333	expansion	9	22	48	5.0177e-31	RFA1B_ORYSJ;Replication protein A 70 kDa DNA-binding subunit B	REPA_OB_2;PF16900.8^Rep_fac-A_C;PF08646.13
OG00087	expansion	19	17	44	9.27181e-27	DIR23_ARATH;Dirigent protein 23	Dirigent;PF03018.17
OG03450	expansion	1	1	43	1.58851e-67	NA	Retrotrans_gag;PF03732.20
OG00069	expansion	17	21	41	2.89247e-20	FRA16_FRAAN;Major strawberry allergen Fra a 1.06 {ECO:0000305}	Bet_v_1;PF00407.22
OG00059	expansion	1	36	40	0.00145696	FH13_ARATH;Formin-like protein 13	zf-GRF;PF06839.15
OG02115	expansion	0	19	39	2.29355e-26	NA	NA
OG01614	expansion	2	16	37	5.10104e-27	FAR1_ARATH;Protein FAR-RED IMPAIRED RESPONSE 1	FAR1;PF03101.18^MULE;PF10551.12
OG01398	expansion	1	27	37	1.13355e-11	NA	MULE;PF10551.12^SWIM;PF04434.20^DBD_Tnp_Mut;PF03108.18
OG03190	expansion	0	13	36	2.49614e-31	RNH_HALSA;Ribonuclease HI	RVT_3;PF13456.9^RT_RNaseH_2;PF17919.4^RT_RNaseH;PF17917.4^RVT_1;PF00078.30^rve;PF00665.29
OG01328	expansion	0	29	36	1.82162e-07	NA	NA
OG00131	expansion	15	17	35	1.99524e-18	UFOG6_FRAAN;UDP-glucose flavonoid 3-O-glucosyltransferase 6 {ECO:0000303|PubMed:18487633}	UDPGT;PF00201.21
OG00238	expansion	14	15	34	2.7914e-20	MIRA_SYNDU;Miraculin	Kunitz_legume;PF00197.21
OG00080	expansion	14	19	34	3.88568e-15	C71A1_PERAE;Cytochrome P450 71A1	p450;PF00067.25
OG00411	expansion	15	16	33	4.05352e-17	RFA1B_ORYSJ;Replication protein A 70 kDa DNA-binding subunit B	Rep_fac-A_C;PF08646.13^REPA_OB_2;PF16900.8
OG00187	expansion	13	16	32	2.41183e-17	Y1465_ARATH;Late embryogenesis abundant protein At1g64065 {ECO:0000305}	LEA_2;PF03168.16
OG00166	expansion	11	20	32	2.13017e-12	GDL8_ARATH;GDSL esterase/lipase At1g28590	Lipase_GDSL;PF00657.25
OG00118	expansion	8	14	32	6.78614e-21	AGL62_ARATH;Agamous-like MADS-box protein AGL62	SRF-TF;PF00319.21
OG00095	expansion	2	21	30	3.89363e-11	PGLR_PERAE;Polygalacturonase	MULE;PF10551.12^SWIM;PF04434.20
OG01015	expansion	2	7	28	1.61128e-30	NA	PMD;PF10536.12
OG00985	expansion	1	21	27	5.72758e-07	ZMYM1_HUMAN;Zinc finger MYM-type protein 1	DUF4371;PF14291.9^Dimer_Tnp_hAT;PF05699.17^LRR_8;PF13855.9^LRR_4;PF12799.10
OG00424	expansion	9	11	26	8.19287e-19	BAD1_ARATH;Ankyrin repeat-containing protein BDA1 {ECO:0000305}	Ank_3;PF13606.9^Ank_5;PF13857.9^Ank_4;PF13637.9^Ank_2;PF12796.10^Ank;PF00023.33^PGG;PF13962.9
OG00233	expansion	0	16	26	8.37845e-12	POLR2_ARATH;Retrovirus-related Pol polyprotein from transposon RE2	Retrotran_gag_3;PF14244.9^gag_pre-integrs;PF13976.9^rve;PF00665.29^Retrotran_gag_2;PF14223.9
OG00400	expansion	11	12	24	8.2006e-12	GLIP5_ARATH;GDSL esterase/lipase 5	Lipase_GDSL;PF00657.25
OG00756	expansion	10	12	24	8.457e-14	VLG_ARATH;Protein VACUOLELESS GAMETOPHYTES {ECO:0000303|PubMed:28107777}	C1_2;PF03107.19^C1_1;PF00130.25^PHD;PF00628.32
OG00175	expansion	11	11	23	4.41676e-12	LERK4_ORYSI;G-type lectin S-receptor-like serine/threonine-protein kinase LECRK4 {ECO:0000305}	B_lectin;PF01453.27^PK_Tyr_Ser-Thr;PF07714.20^Pkinase;PF00069.28
OG00252	expansion	3	17	23	1.82625e-07	CURE1_SOLLC;Cuscuta receptor 1 {ECO:0000303|PubMed:27471302 ECO:0000303|PubMed:33082345}	LRR_4;PF12799.10^LRR_8;PF13855.9^LRR_1;PF00560.36^LRR_6;PF13516.9^LRRNT_2;PF08263.15
OG00220	expansion	7	15	22	1.3184e-07	PGLR_TOBAC;Polygalacturonase	Glyco_hydro_28;PF00295.20^Pectate_lyase_3;PF12708.10
OG03600	expansion	5	6	22	2.22196e-22	CE101_ARATH;G-type lectin S-receptor-like serine/threonine-protein kinase CES101	Pkinase;PF00069.28^PK_Tyr_Ser-Thr;PF07714.20^B_lectin;PF01453.27^ABC1;PF03109.19^DUF3403;PF11883.11^CAP;PF00188.29^LysM;PF01476.23
OG00495	expansion	11	8	21	1.14923e-12	F6H1_ARATH;Feruloyl CoA ortho-hydroxylase 1 {ECO:0000303|PubMed:18547395}	2OG-FeII_Oxy;PF03171.23^DIOX_N;PF14226.9
OG00270	expansion	9	11	21	4.31544e-11	RUMI_CULQU;O-glucosyltransferase rumi homolog	Glyco_transf_90;PF05686.15
OG00096	expansion	0	10	21	1.17108e-14	RSLE2_ORYSJ;Zinc finger BED domain-containing protein RICESLEEPER 2	DUF4413;PF14372.9^Dimer_Tnp_hAT;PF05699.17^zf-BED;PF02892.18
OG00173	expansion	8	9	20	7.30556e-11	AT17_ACTDE;Alcohol acyltransferase 17 {ECO:0000303|PubMed:21450321}	Transferase;PF02458.18
OG00100	expansion	6	9	20	5.59293e-13	NLTP_HELAN;Non-specific lipid-transfer protein	Tryp_alpha_amyl;PF00234.25^LTP_2;PF14368.9
OG05059	expansion	2	14	20	6.47266e-08	NA	Transposase_24;PF03004.17
OG00054	expansion	0	13	20	1.38956e-09	RNHX1_ARATH;Putative ribonuclease H protein At1g65750	RVT_1;PF00078.30
OG00099	expansion	10	8	19	3.54787e-11	ZOX_PHAVU;Zeatin O-xylosyltransferase {ECO:0000303|PubMed:10364407}	UDPGT;PF00201.21
OG01383	expansion	6	12	19	4.38277e-08	Y3264_ARATH;Putative UPF0481 protein At3g02645	DUF247;PF03140.18
OG00084	expansion	9	9	18	5.41059e-10	IDD10_ARATH;Zinc finger protein JACKDAW {ECO:0000303|PubMed:17785527}	zf-C2H2;PF00096.29
OG00984	expansion	2	10	18	1.6226e-11	FBK67_ARATH;F-box/kelch-repeat protein At3g23880	F-box;PF00646.36^F-box-like;PF12937.10^FBA_1;PF07734.16^FBA_3;PF08268.15
OG11164	expansion	0	8	18	2.14005e-15	PPR32_ARATH;Pentatricopeptide repeat-containing protein At1g11290 chloroplastic {ECO:0000305}	Retrotrans_gag;PF03732.20^PPR;PF01535.23^PPR_2;PF13041.9^PPR_1;PF12854.10^Ty3_capsid;PF19259.2^PPR_3;PF13812.9^TPR_19;PF14559.9
OG10314	expansion	0	9	18	1.24655e-13	NA	NA
OG00474	expansion	0	13	18	1.34648e-06	NA	Retrotran_gag_2;PF14223.9
OG02771	expansion	7	5	17	5.72003e-14	U75C1_SOLLC;UDP-glycosyltransferase 75C1 {ECO:0000303|PubMed:28482127}	UDPGT;PF00201.21
OG00176	expansion	6	8	17	7.03221e-12	PRB1_TOBAC;Basic form of pathogenesis-related protein 1	CAP;PF00188.29
OG00215	expansion	6	11	17	9.33261e-07	GIP2_NICBE;Probable aspartic proteinase GIP2 {ECO:0000305}	TAXi_C;PF14541.9^TAXi_N;PF14543.9
OG03188	expansion	1	13	17	3.8319e-05	ZMYM1_HUMAN;Zinc finger MYM-type protein 1	Dimer_Tnp_hAT;PF05699.17^DUF4371;PF14291.9
OG00076	expansion	0	9	17	7.03221e-12	POLX_TOBAC;Retrovirus-related Pol polyprotein from transposon TNT 1-94	Retrotran_gag_2;PF14223.9^DUF4219;PF13961.9^gag_pre-integrs;PF13976.9
OG00854	expansion	8	6	16	1.82695e-10	DTX27_ARATH;Protein DETOXIFICATION 27 {ECO:0000303|PubMed:11739388}	MatE;PF01554.21
OG00248	expansion	7	7	16	1.82695e-10	Y5389_ARATH;Probable receptor-like protein kinase At5g38990	PK_Tyr_Ser-Thr;PF07714.20^Pkinase;PF00069.28^Malectin;PF11721.11^Malectin_like;PF12819.10^ABC1;PF03109.19
OG00293	expansion	7	9	16	1.14664e-08	PERX_NICSY;Lignin-forming anionic peroxidase	peroxidase;PF00141.26
OG00536	expansion	5	8	16	1.82695e-10	CRR55_ARATH;Cysteine-rich repeat secretory protein 55	Stress-antifung;PF01657.20
OG07907	expansion	4	4	16	2.0327e-16	CYC02_CATRO;CYC02 protein	GRP;PF07172.14
OG00158	expansion	4	7	16	2.9431e-12	5MAT1_SALSN;Malonyl-coenzyme:anthocyanin 5-O-glucoside-6'''-O-malonyltransferase {ECO:0000303|PubMed:11598135}	Transferase;PF02458.18
OG00545	expansion	3	13	16	0.00092488	ACCO_DIOKA;1-aminocyclopropane-1-carboxylate oxidase	2OG-FeII_Oxy;PF03171.23^DIOX_N;PF14226.9
OG03075	expansion	0	7	16	2.52257e-14	NA	DUF247;PF03140.18
OG00148	expansion	9	6	15	6.83566e-09	MYBF_ARATH;Putative Myb family transcription factor At1g14600	Myb_DNA-binding;PF00249.34
OG00246	expansion	9	4	15	6.83566e-09	SOC1_ARATH;MADS-box protein SOC1 {ECO:0000303|PubMed:15805477 ECO:0000303|PubMed:17428825 ECO:0000303|PubMed:18339670}	K-box;PF01486.20^SRF-TF;PF00319.21
OG00390	expansion	6	7	15	6.83566e-09	BBE21_ARATH;Berberine bridge enzyme-like 21 {ECO:0000303|PubMed:26037923}	BBE;PF08031.15^FAD_binding_4;PF01565.26
OG00395	expansion	4	8	15	6.83566e-09	YS1_MAIZE;Iron-phytosiderophore transporter yellow stripe 1	mTERF;PF02536.17
OG00314	expansion	2	8	15	2.35223e-10	ZFP1_ORYSJ;Probable E3 ubiquitin-protein ligase ZFP1 {ECO:0000305}	zf-RING_2;PF13639.9^zf-rbx1;PF12678.10^zf-C3HC4_2;PF13923.9^zf-C3HC4;PF00097.28^zf-RING_11;PF17123.8^zf-RING_5;PF14634.9^zf-C3HC4_3;PF13920.9
OG01160	expansion	0	5	15	1.03313e-14	NAC83_ARATH;NAC domain-containing protein 83 {ECO:0000303|PubMed:15029955}	NAM;PF02365.18
OG01218	expansion	6	6	14	8.53973e-11	E13L_TOBAC;Glucan endo-13-beta-glucosidase acidic isoform GL153	Glyco_hydro_17;PF00332.21
OG02257	expansion	6	5	14	8.53973e-11	RL39_CANAX;Large ribosomal subunit protein eL39 {ECO:0000305}	Ribosomal_L39;PF00832.23
OG00345	expansion	6	6	14	3.89697e-09	E13C_MUSAC;Glucan endo-13-beta-glucosidase {ECO:0000305}	Glyco_hydro_17;PF00332.21
OG00580	expansion	6	8	14	2.55808e-07	OBL1_TOBAC;Triacylglycerol lipase OBL1 {ECO:0000305}	Lipase_3;PF01764.28^Mbeg1-like;PF11187.11
OG00509	expansion	5	7	14	3.89697e-09	UBQ10_ARATH;Polyubiquitin 10	ubiquitin;PF00240.26^Rad60-SLD;PF11976.11^Ubiquitin_2;PF14560.9^TBK1_ULD;PF18396.4^Rad60-SLD_2;PF13881.9^Dsc3_N;PF10302.12^DUF2604;PF10790.12^Ubiquitin_5;PF18037.4^Plexin_RBD;PF20170.1^TmoB;PF06234.15^Crinkler;PF20147.2^DUF3861;PF12977.10^Staphylokinase;PF02821.19^HemeBinding_Shp;PF11545.11^Sde2_N_Ubi;PF13019.9^ACT_5;PF13710.9^CFAP298;PF11069.11^UDP-g_GGTase;PF06427.14^DUF493;PF04359.17^NEAT;PF05…
OG00418	expansion	0	5	14	5.06479e-13	Y3518_ARATH;B3 domain-containing protein At3g25182	At2g31720-like;PF03754.16
OG00347	expansion	0	9	14	2.55808e-07	YG31B_YEAST;Transposon Ty3-G Gag-Pol polyprotein	NA
OG00122	expansion	6	7	13	1.53101e-07	SUT32_ARATH;Sulfate transporter 3.2	Sulfate_transp;PF00916.23^STAS;PF01740.24
OG00807	expansion	5	8	13	1.53101e-07	PME59_ARATH;Probable pectinesterase/pectinesterase inhibitor 59	Pectinesterase;PF01095.22^PMEI;PF04043.18
OG00184	expansion	4	6	13	2.10552e-09	DTX43_ARATH;Protein DETOXIFICATION 43 {ECO:0000303|PubMed:11739388}	BPS1;PF03087.17
OG00373	expansion	4	6	13	2.10552e-09	RLP6_ARATH;Receptor-like protein 6 {ECO:0000303|PubMed:18434605}	LRR_4;PF12799.10^LRR_8;PF13855.9^LRR_1;PF00560.36^LRR_6;PF13516.9^LRRNT_2;PF08263.15
OG00195	expansion	4	7	13	1.53101e-07	UBP13_ARATH;Ubiquitin C-terminal hydrolase 13 {ECO:0000303|PubMed:11115897}	MATH;PF00917.29
OG00188	expansion	4	9	13	9.55914e-06	ERF92_ARATH;Ethylene-responsive transcription factor 1B	AP2;PF00847.23
OG01443	expansion	3	7	13	2.10552e-09	Y5838_ARATH;Probably inactive leucine-rich repeat receptor-like protein kinase At5g48380	PK_Tyr_Ser-Thr;PF07714.20^Pkinase;PF00069.28^LRR_4;PF12799.10^LRR_8;PF13855.9^LRRNT_2;PF08263.15
OG00140	expansion	6	6	12	8.69522e-08	RAC5_ORYSJ;Rac-like GTP-binding protein 5	Ras;PF00071.25^Roc;PF08477.16
OG00291	expansion	6	6	12	8.69522e-08	ARF1_DAUCA;ADP-ribosylation factor 1	G-alpha;PF00503.23^Roc;PF08477.16^Arf;PF00025.24^Ras;PF00071.25^SRPRB;PF09439.13^Gtr1_RagA;PF04670.15
OG00808	expansion	5	5	12	1.06382e-09	U75B1_ARATH;UDP-glycosyltransferase 75B1	UDPGT;PF00201.21
OG00300	expansion	5	7	12	6.13325e-06	BH118_ARATH;Transcription factor bHLH118	HLH;PF00010.29
OG00708	expansion	4	7	12	8.69522e-08	CPR1_ARATH;F-box protein CPR1	F-box;PF00646.36^FBA_1;PF07734.16^F-box-like;PF12937.10^FBA_3;PF08268.15
OG00951	expansion	4	6	12	8.69522e-08	XGAT3_POPTR;Xyloglucan O-acetyltransferase 3 {ECO:0000303|PubMed:30083810}	PC-Esterase;PF13839.9^PMR5N;PF14416.9
OG00163	expansion	3	5	12	1.06382e-09	PPO_MALDO;Polyphenol oxidase chloroplastic	Tyrosinase;PF00264.23^PPO1_KFDV;PF12143.11^PPO1_DWL;PF12142.11
OG00754	expansion	3	5	12	1.06382e-09	SRC2_ARATH;Protein SRC2 homolog {ECO:0000305}	C2;PF00168.33
OG00936	expansion	3	9	12	0.000325723	FBK50_ARATH;F-box/kelch-repeat protein At3g06240	FBA_1;PF07734.16^F-box;PF00646.36^FBA_3;PF08268.15^F-box-like;PF12937.10
OG00290	expansion	1	7	12	8.69522e-08	PMEI_ACTDE;Pectinesterase inhibitor	PMEI;PF04043.18
OG14994	expansion	0	1	12	8.19417e-19	NA	zf-RVT;PF13966.9^RVT_3;PF13456.9
OG14641	expansion	0	3	12	3.04721e-16	NA	Retrotrans_gag;PF03732.20^Ty3_capsid;PF19259.2
OG13777	expansion	0	4	12	6.80377e-14	M310_ARATH;Uncharacterized mitochondrial protein AtMg00310	NA
OG13771	expansion	0	7	12	8.69522e-08	NA	Retrotrans_gag;PF03732.20
OG00271	expansion	6	4	11	4.64009e-08	PDS5C_ARATH;Sister chromatid cohesion protein PDS5 homolog C {ECO:0000305}	PDS5;PF20168.1
OG00298	expansion	5	5	11	4.64009e-08	JMJ29_ARATH;Lysine-specific demethylase JMJ29 {ECO:0000303|PubMed:18713399}	JmjC;PF02373.25^WRC;PF08879.13
OG00848	expansion	5	5	11	4.64009e-08	SCL30_ARATH;Scarecrow-like protein 30	GRAS;PF03514.17
OG03073	expansion	5	4	11	4.64009e-08	GSTU9_ARATH;Glutathione S-transferase U9	GST_N_3;PF13417.9^GST_N;PF02798.23^GST_N_2;PF13409.9
OG00371	expansion	5	6	11	3.72369e-06	ODD19_ORYSJ;2-oxoglutarate-dependent dioxygenase 19 {ECO:0000303|PubMed:25728912}	2OG-FeII_Oxy;PF03171.23^DIOX_N;PF14226.9
OG02489	expansion	4	4	11	8.82831e-10	GL33_ORYSJ;Germin-like protein 3-3	Cupin_1;PF00190.25^Cupin_2;PF07883.14
OG01341	expansion	2	1	11	5.67351e-17	AHL21_ARATH;AT-hook motif nuclear-localized protein 21 {ECO:0000312|EMBL:FAA00292.1}	PCC;PF03479.18
OG02012	expansion	2	9	11	0.00871827	USPL1_ARATH;BURP domain protein USPL1 {ECO:0000303|PubMed:19639386}	BURP;PF03181.18
OG14456	expansion	0	3	11	1.89952e-14	FRS7_ARATH;Protein FAR1-RELATED SEQUENCE 7	NA
OG14293	expansion	0	5	11	8.82831e-10	NA	Transposase_28;PF04195.15
OG00237	expansion	5	5	10	2.11262e-06	TT1_ARATH;Protein TRANSPARENT TESTA 1	NA
OG01267	expansion	4	3	10	2.01338e-10	NA	PDDEXK_6;PF04720.15
OG00366	expansion	4	4	10	2.29329e-08	PER5_VITVI;Peroxidase 5 {ECO:0000250|UniProtKB:P22195}	peroxidase;PF00141.26
OG00689	expansion	4	4	10	2.29329e-08	EGC_CITJA;EG45-like domain containing protein	DPBB_1;PF03330.21
OG02733	expansion	4	4	10	2.29329e-08	SD25_ARATH;G-type lectin S-receptor-like serine/threonine-protein kinase SD2-5	B_lectin;PF01453.27^Pkinase;PF00069.28^PK_Tyr_Ser-Thr;PF07714.20
OG00245	expansion	4	6	10	2.11262e-06	NA	mTERF;PF02536.17
OG00497	expansion	4	5	10	2.11262e-06	CPR1_ARATH;F-box protein CPR1	F-box;PF00646.36^F-box-like;PF12937.10^FBA_1;PF07734.16
OG00533	expansion	3	5	10	2.29329e-08	WAXS4_ARATH;Probable long-chain-alcohol O-fatty-acyltransferase 4	MBOAT_2;PF13813.9
OG00948	expansion	3	7	10	0.000156893	HCT1_ACTRA;Hydroxycinnamoyl-CoA:piscidic acid hydroxycinnamoyltransferase {ECO:0000303|PubMed:31069522}	Transferase;PF02458.18
OG01894	expansion	3	7	10	0.000156893	GLR24_ARATH;Glutamate receptor 2.4	SBP_bac_3;PF00497.23^ANF_receptor;PF01094.31^Peripla_BP_6;PF13458.9^Lig_chan;PF00060.29^Lig_chan-Glu_bd;PF10613.12
OG01627	expansion	2	3	10	2.01338e-10	ASR2_SOLLC;Abscisic stress-ripening protein 2 {ECO:0000303|PubMed:7846175}	ABA_WDS;PF02496.19
OG00144	expansion	2	6	10	2.11262e-06	CPR1_ARATH;F-box protein CPR1	F-box;PF00646.36^F-box-like;PF12937.10^FBA_1;PF07734.16
OG01880	expansion	2	7	10	0.000156893	RGL2_ARATH;DELLA protein RGL2 {ECO:0000303|PubMed:11877383}	GRAS;PF03514.17
OG14783	expansion	1	3	10	1.15796e-12	NA	Dimer_Tnp_hAT;PF05699.17
OG02562	expansion	1	5	10	2.29329e-08	FB30_ARATH;Putative F-box protein At1g32420	F-box;PF00646.36^FBA_3;PF08268.15^F-box-like;PF12937.10
OG00996	expansion	0	5	10	2.29329e-08	M860_ARATH;Uncharacterized mitochondrial protein AtMg00860	RT_RNaseH_2;PF17919.4^RVT_1;PF00078.30^RT_RNaseH;PF17917.4
OG02594	expansion	9	0	9	9.97646e-05	UTP20_HUMAN;Small subunit processome component 20 homolog	DRIM;PF07539.15^DUF6700;PF20416.1
OG05905	expansion	5	4	9	1.10227e-06	TPS3_LITCU;Alpha-thujene synthase TPS3 chloroplastic {ECO:0000303|Ref.1}	Terpene_synth_C;PF03936.19^Terpene_syn_C_2;PF19086.3^Terpene_synth;PF01397.24
OG14294	expansion	4	1	9	1.024e-08	RPM1_ARATH;Disease resistance protein RPM1 {ECO:0000303|PubMed:7638602}	NB-ARC;PF00931.25^Rx_N;PF18052.4^LRR_8;PF13855.9^AAA_16;PF13191.9^Retrotran_gag_2;PF14223.9^AAA_22;PF13401.9
OG00360	expansion	4	4	9	1.10227e-06	PUP1_ARATH;Purine permease 1 {ECO:0000303|PubMed:10662864}	PUNUT;PF16913.8^EamA;PF00892.23^Nuc_sug_transp;PF04142.18
OG01899	expansion	4	5	9	1.10227e-06	GSTZ1_DIACA;Glutathione S-transferase 1	GST_N_3;PF13417.9^GST_N;PF02798.23^GST_N_2;PF13409.9^GST_C_3;PF14497.9
OG02106	expansion	4	4	9	1.10227e-06	DRL12_ARATH;Probable disease resistance protein At1g59620	NB-ARC;PF00931.25^Rx_N;PF18052.4^AAA_16;PF13191.9^AAA_22;PF13401.9
OG00651	expansion	4	5	9	9.97646e-05	PHI1_TOBAC;Protein PHOSPHATE-INDUCED 1 {ECO:0000303|PubMed:10189698}	Phi_1;PF04674.15
OG00430	expansion	3	4	9	1.10227e-06	DVL4_ARATH;Small polypeptide DEVIL 4 {ECO:0000303|PubMed:14871303}	DVL;PF08137.15
OG01180	expansion	3	5	9	1.10227e-06	ANGLT_ROSHC;Anthocyanidin 53-O-glucosyltransferase	UDPGT;PF00201.21
OG00378	expansion	3	5	9	9.97646e-05	Y5698_ARATH;Putative B3 domain-containing protein At5g66980	B3;PF02362.24
OG01665	expansion	2	4	9	1.024e-08	NA	NA
OG02231	expansion	2	4	9	1.024e-08	SCP10_ARATH;Serine carboxypeptidase-like 10	Peptidase_S10;PF00450.25
OG01453	expansion	2	5	9	1.10227e-06	CHT5B_MEDTR;Class V chitinase CHIT5b {ECO:0000305}	Glyco_hydro_18;PF00704.31
OG00695	expansion	1	4	9	1.024e-08	PTI5_SOLLC;Pathogenesis-related genes transcriptional activator PTI5	AP2;PF00847.23
OG00281	expansion	1	5	9	1.10227e-06	1433C_TOBAC;14-3-3-like protein C	14-3-3;PF00244.23
OG00766	expansion	1	5	9	1.10227e-06	HSP21_MAIZE;17.5 kDa class II heat shock protein	HSP20;PF00011.24^ArsA_HSP20;PF17886.4
OG15222	expansion	0	2	9	2.6333e-13	NA	MULE;PF10551.12^DBD_Tnp_Mut;PF03108.18^SWIM;PF04434.20
OG00068	expansion	0	3	9	6.8643e-11	FB145_ARATH;Putative F-box protein At3g16210	NA
OG11157	expansion	0	5	9	1.10227e-06	NDC1_ARATH;Alternative NAD(P)H-ubiquinone oxidoreductase C1 chloroplastic/mitochondrial {ECO:0000303|PubMed:15333756}	Myb_DNA-bind_3;PF12776.10
OG00568	expansion	5	2	8	5.82637e-05	PER1_ORYSJ;Peroxidase 1	peroxidase;PF00141.26
OG00840	expansion	4	3	8	5.18378e-07	Y4744_ARATH;Uncharacterized protein At4g06744	LRR_8;PF13855.9^LRR_4;PF12799.10^LRR_1;PF00560.36
OG00889	expansion	4	3	8	5.18378e-07	SEOB_ARATH;Protein SIEVE ELEMENT OCCLUSION B {ECO:0000303|PubMed:20932300}	SEO_C;PF14577.9^SEO_N;PF14576.9
OG15217	expansion	4	0	8	5.18378e-07	NA	Rx_N;PF18052.4
OG00276	expansion	4	4	8	5.82637e-05	PME28_ARATH;Putative pectinesterase/pectinesterase inhibitor 28	Pectinesterase;PF01095.22^PMEI;PF04043.18
OG00319	expansion	4	4	8	5.82637e-05	ABAH3_ORYSJ;Abscisic acid 8'-hydroxylase 3	p450;PF00067.25
OG00380	expansion	4	4	8	5.82637e-05	AATP6_ARATH;AAA-ATPase At3g28520	AAA;PF00004.32^AAA_assoc;PF14363.9
OG00391	expansion	4	4	8	5.82637e-05	21KD_DAUCA;21 kDa protein	PMEI;PF04043.18
OG00453	expansion	4	4	8	5.82637e-05	JGB_ARATH;Protein JINGUBANG {ECO:0000303|PubMed:27468890}	WD40;PF00400.35^NBCH_WD40;PF20426.1^PQQ_3;PF13570.9^WD40_2;PF19056.3
OG00488	expansion	4	4	8	5.82637e-05	EIF1B_HUMAN;Eukaryotic translation initiation factor 1b	SUI1;PF01253.25
OG00521	expansion	4	4	8	5.82637e-05	Y2416_ARATH;Uncharacterized protein At2g34160	Alba;PF01918.24
OG00820	expansion	4	4	8	5.82637e-05	B561J_ARATH;Cytochrome b561 and DOMON domain-containing protein At5g47530	DUF568;PF04526.16^Cytochrom_B561;PF03188.19
OG00943	expansion	4	4	8	5.82637e-05	APY_SOLTU;Apyrase	GDA1_CD39;PF01150.20
OG00974	expansion	4	4	8	5.82637e-05	HIDM_GLYEC;2-hydroxyisoflavanone dehydratase	Abhydrolase_3;PF07859.16^BD-FAE;PF20434.1^COesterase;PF00135.31^Say1_Mug180;PF10340.12
OG05283	expansion	3	1	8	3.92504e-09	BH168_ARATH;Transcription factor bHLH168 {ECO:0000305}	NA
OG00374	expansion	3	3	8	5.18378e-07	UXS2_ARATH;UDP-glucuronic acid decarboxylase 2	NAD_binding_4;PF07993.15^GDP_Man_Dehyd;PF16363.8^Epimerase;PF01370.24^3Beta_HSD;PF01073.22^RmlD_sub_bind;PF04321.20^Polysacc_synt_2;PF02719.18
OG01931	expansion	3	3	8	5.18378e-07	Y1105_ARATH;Probable receptor-like protein kinase At1g11050	Pkinase;PF00069.28^PK_Tyr_Ser-Thr;PF07714.20^SPARK;PF19160.3
OG02300	expansion	3	4	8	5.18378e-07	NEP1_CAEEL;Ribosomal RNA small subunit methyltransferase nep-1 {ECO:0000250|UniProtKB:Q92979}	EMG1;PF03587.17
OG00257	expansion	3	5	8	5.82637e-05	SAU51_ARATH;Protein SMALL AUXIN UP-REGULATED RNA 51 {ECO:0000303|PubMed:29258424}	Auxin_inducible;PF02519.17
OG00289	expansion	3	4	8	5.82637e-05	NA	BPS1;PF03087.17
OG00446	expansion	3	4	8	5.82637e-05	LAC16_ARATH;Laccase-16	Cu-oxidase_2;PF07731.17^Cu-oxidase_3;PF07732.18^Cu-oxidase;PF00394.25
OG00942	expansion	3	5	8	5.82637e-05	G3OX_PEA;Gibberellin 3-beta-dioxygenase 1	2OG-FeII_Oxy;PF03171.23^DIOX_N;PF14226.9
OG01532	expansion	3	5	8	5.82637e-05	PUP10_ARATH;Probable purine permease 10	PUNUT;PF16913.8^EamA;PF00892.23
OG02028	expansion	1	1	8	1.75529e-11	POLR1_ARATH;Retrovirus-related Pol polyprotein from transposon RE1	rve;PF00665.29^RVT_2;PF07727.17^gag_pre-integrs;PF13976.9^Retrotran_gag_2;PF14223.9
OG01418	expansion	1	6	8	0.00403118	FBL45_ARATH;Putative F-box/LRR-repeat protein At3g18150	NA
OG00129	expansion	0	3	8	3.92504e-09	OGG1_RAT;N-glycosylase/DNA lyase	Retrotran_gag_2;PF14223.9
OG01963	expansion	0	3	8	3.92504e-09	ZHD10_ARATH;Zinc-finger homeodomain protein 10	NA
OG11841	expansion	5	2	7	3.02e-05	RNS4_ANTHI;Ribonuclease S-4	Ribonuclease_T2;PF00445.21
OG00328	expansion	4	3	7	3.02e-05	DIR1_ARATH;Dirigent protein 1	DUF707;PF05212.15
OG00462	expansion	4	3	7	3.02e-05	HIP39_ARATH;Heavy metal-associated isoprenylated plant protein 39 {ECO:0000303|PubMed:21072340 ECO:0000303|PubMed:23368984}	HMA;PF00403.29
OG00742	expansion	4	3	7	3.02e-05	RLA13_ARATH;Large ribosomal subunit protein P1y {ECO:0000303|PubMed:36423343}	Ribosomal_60s;PF00428.22
OG01086	expansion	4	3	7	3.02e-05	JOX2_ARATH;Jasmonate-induced oxygenase 2 {ECO:0000303|PubMed:28559313}	2OG-FeII_Oxy;PF03171.23^DIOX_N;PF14226.9
OG01182	expansion	4	2	7	3.02e-05	CML44_ARATH;Probable calcium-binding protein CML44	EF-hand_6;PF13405.9^EF-hand_5;PF13202.9^EF-hand_1;PF00036.35^EF-hand_8;PF13833.9^EF-hand_7;PF13499.9^EF-hand_9;PF14658.9
OG01494	expansion	4	3	7	3.02e-05	UFD1_DICDI;Ubiquitin fusion degradation protein 1 homolog	UFD1;PF03152.17
OG01798	expansion	4	2	7	3.02e-05	GAT15_ARATH;GATA transcription factor 15	GATA;PF00320.30
OG01814	expansion	4	3	7	3.02e-05	CPC_ARATH;Transcription factor CPC	Myb_DNA-binding;PF00249.34
OG02298	expansion	4	3	7	3.02e-05	CLSY3_ARATH;SNF2 domain-containing protein CLASSY 3	SNF2-rel_dom;PF00176.26^Helicase_C;PF00271.34^ResIII;PF04851.18
OG00841	expansion	3	2	7	2.13856e-07	ENOL1_ORYSJ;Early nodulin-like protein 1 {ECO:0000303|PubMed:15653800}	Cu_bind_like;PF02298.20
OG01566	expansion	3	2	7	2.13856e-07	AP2L1_ARATH;AP2-like ethylene-responsive transcription factor At1g16060	AP2;PF00847.23
OG05571	expansion	3	2	7	2.13856e-07	CHIC_ARATH;Class V chitinase {ECO:0000303|PubMed:22936594}	Glyco_hydro_18;PF00704.31
OG00283	expansion	3	3	7	3.02e-05	LTPG5_ARATH;Non-specific lipid transfer protein GPI-anchored 5 {ECO:0000303|PubMed:23893219}	LTP_2;PF14368.9^Tryp_alpha_amyl;PF00234.25
OG00343	expansion	3	3	7	3.02e-05	ERF36_ARATH;Ethylene-responsive transcription factor ERF036	AP2;PF00847.23
OG00435	expansion	3	3	7	3.02e-05	IMPA4_ARATH;Importin subunit alpha-4 {ECO:0000305}	Arm;PF00514.26^HEAT_2;PF13646.9^HEAT_EZ;PF13513.9^HEAT;PF02985.25^Arm_2;PF04826.16^IBB;PF01749.23^Arm_3;PF16186.8
OG00436	expansion	3	3	7	3.02e-05	RTNLA_ARATH;Reticulon-like protein B1	Reticulon;PF02453.20
OG00628	expansion	3	4	7	3.02e-05	NA	Myb_DNA-bind_4;PF13837.9
OG00655	expansion	3	4	7	3.02e-05	SUMO2_ARATH;Small ubiquitin-related modifier 2	Rad60-SLD;PF11976.11^ubiquitin;PF00240.26
OG00658	expansion	3	3	7	3.02e-05	ALFL5_ORYSI;PHD finger protein ALFIN-LIKE 5	Alfin;PF12165.11^PHD;PF00628.32
OG00794	expansion	3	3	7	3.02e-05	P2A13_ARATH;F-box protein PP2-A13	PP2;PF14299.9
OG00896	expansion	3	3	7	3.02e-05	DGR2_ARATH;Protein DUF642 L-GALACTONO-14-LACTONE-RESPONSIVE GENE 2 {ECO:0000303|PubMed:22323769}	DUF642;PF04862.15
OG00960	expansion	3	3	7	3.02e-05	AOP2V_ARATH;2-oxoglutarate-dependent dioxygenase AOP2	2OG-FeII_Oxy;PF03171.23^DIOX_N;PF14226.9
OG01006	expansion	3	4	7	3.02e-05	M313B_XENLA;Mitogen-activated protein kinase kinase kinase 13-B	PK_Tyr_Ser-Thr;PF07714.20^Pkinase;PF00069.28^PB1;PF00564.27
OG01257	expansion	3	3	7	3.02e-05	PIN5_ARATH;Auxin efflux carrier component 5 {ECO:0000303|PubMed:15817418}	Mem_trans;PF03547.21
OG01659	expansion	3	3	7	3.02e-05	STOX_ARGME;Tetrahydroberberine oxidase {ECO:0000305}	FAD_binding_4;PF01565.26^BBE;PF08031.15
OG03319	expansion	3	3	7	3.02e-05	RS29_GRIJA;Small ribosomal subunit protein uS14 {ECO:0000305}	Ribosomal_S14;PF00253.24
OG01216	expansion	2	3	7	2.13856e-07	GDL69_ARATH;GDSL esterase/lipase At5g03590	Lipase_GDSL;PF00657.25
OG02657	expansion	2	3	7	2.13856e-07	Y3622_ARATH;B3 domain-containing protein At3g06220	B3;PF02362.24
OG03629	expansion	2	2	7	2.13856e-07	CSPLL_POPTR;CASP-like protein 4D1	CASP_dom;PF04535.15
OG03725	expansion	2	2	7	2.13856e-07	708G1_CITJP;UDP-glycosyltransferase 708G1 {ECO:0000303|PubMed:28370711}	UDPGT;PF00201.21^LRR_8;PF13855.9
OG00612	expansion	2	4	7	3.02e-05	PLAT3_ARATH;PLAT domain-containing protein 3 {ECO:0000305}	PLAT;PF01477.26^ATS3;PF06232.14
OG00700	expansion	2	3	7	3.02e-05	MAVI_CUCPE;Mavicyanin	Cu_bind_like;PF02298.20
OG00707	expansion	2	3	7	3.02e-05	PSI1_ARATH;Protein PSK SIMULATOR 1 {ECO:0000303|PubMed:25062973}	DUF668;PF05003.15^DUF3475;PF11961.11
OG00917	expansion	2	4	7	3.02e-05	YIPL4_ARATH;Protein yippee-like At3g55890	Yippee-Mis18;PF03226.17
OG03447	expansion	1	1	7	1.14633e-09	HIP32_ARATH;Heavy metal-associated isoprenylated plant protein 32 {ECO:0000303|PubMed:21072340 ECO:0000303|PubMed:23368984}	HMA;PF00403.29
OG06926	expansion	1	2	7	1.14633e-09	NA	Rho_N;PF07498.15
OG01580	expansion	1	3	7	2.13856e-07	NLTP2_ORYSI;Non-specific lipid-transfer protein 2	LTP_2;PF14368.9^Tryp_alpha_amyl;PF00234.25
OG01161	expansion	0	0	7	2.56499e-12	NA	MULE;PF10551.12^SWIM;PF04434.20
OG15659	expansion	0	1	7	2.56499e-12	M1250_ARATH;Uncharacterized mitochondrial protein AtMg01250	RVT_1;PF00078.30
OG07361	expansion	0	2	7	1.14633e-09	NA	NA
OG01227	expansion	0	4	7	3.02e-05	FRS11_ARATH;Protein FAR1-RELATED SEQUENCE 11	FAR1;PF03101.18^MULE;PF10551.12^SWIM;PF04434.20
OG11842	expansion	0	4	7	3.02e-05	POL_CAMVN;Enzymatic polyprotein	Retrotrans_gag;PF03732.20^Ty3_capsid;PF19259.2^RVP_2;PF08284.14
OG00362	expansion	3	3	6	1.315e-05	LSH10_ARATH;Protein LIGHT-DEPENDENT SHORT HYPOCOTYLS 10	ALOG_dom;PF04852.15
OG00459	expansion	3	3	6	1.315e-05	METK2_CATRO;S-adenosylmethionine synthase 2	S-AdoMet_synt_M;PF02772.19^S-AdoMet_synt_N;PF00438.23^S-AdoMet_synt_C;PF02773.19
OG00519	expansion	3	3	6	1.315e-05	14311_ARATH;14-3-3-like protein GF14 omicron	14-3-3;PF00244.23
OG00564	expansion	3	3	6	1.315e-05	JOIN_SOLLC;MADS-box protein JOINTLESS	K-box;PF01486.20^SRF-TF;PF00319.21
OG00569	expansion	3	3	6	1.315e-05	ARFL_ORYSI;Auxin response factor 12	AUX_IAA;PF02309.19^Auxin_resp;PF06507.16^B3;PF02362.24
OG00665	expansion	3	3	6	1.315e-05	TBL34_ARATH;Protein trichome birefringence-like 34	PC-Esterase;PF13839.9^PMR5N;PF14416.9
OG00691	expansion	3	3	6	1.315e-05	NFYB4_ARATH;Nuclear transcription factor Y subunit B-4	CBFD_NFYB_HMF;PF00808.26^Histone;PF00125.27
OG00723	expansion	3	3	6	1.315e-05	BCP_PETHY;Blue copper protein {ECO:0000303|PubMed:25971550}	Cu_bind_like;PF02298.20
OG01152	expansion	3	2	6	1.315e-05	CSLE2_ORYSJ;Cellulose synthase-like protein E2	Cellulose_synt;PF03552.17^EMP24_GP25L;PF01105.27
OG01238	expansion	3	2	6	1.315e-05	CHI2_TOBAC;Endochitinase B	Glyco_hydro_19;PF00182.22^Chitin_bind_1;PF00187.22
OG01262	expansion	3	3	6	1.315e-05	CYL2_ARATH;Cyclase-like protein 2 {ECO:0000305}	Root_cap;PF06830.14
OG01356	expansion	3	2	6	1.315e-05	RL4A_ARATH;Large ribosomal subunit protein uL4z {ECO:0000303|PubMed:36423343}	Ribos_L4_asso_C;PF14374.9^Ribosomal_L4;PF00573.25
OG01360	expansion	3	3	6	1.315e-05	PME49_ARATH;Probable pectinesterase 49	Pectinesterase;PF01095.22^DUF5010_C;PF18099.4
OG01397	expansion	3	3	6	1.315e-05	LAT52_SOLLC;Anther-specific protein LAT52	Pollen_Ole_e_1;PF01190.20
OG01581	expansion	3	3	6	1.315e-05	NA	NA
OG01600	expansion	3	3	6	1.315e-05	SWT16_ORYSJ;Bidirectional sugar transporter SWEET16	MtN3_slv;PF03083.19
OG01819	expansion	3	2	6	1.315e-05	PP166_ARATH;Pentatricopeptide repeat-containing protein At2g20710 mitochondrial	PPR;PF01535.23^PPR_2;PF13041.9^PPR_3;PF13812.9^PPR_long;PF17177.7^PPR_1;PF12854.10^TPR_19;PF14559.9^TPR_7;PF13176.9^TPR_14;PF13428.9
OG02413	expansion	3	3	6	1.315e-05	EXG_SCHOC;Glucan 13-beta-glucosidase	Cellulase;PF00150.21^Fascin;PF06268.16
OG03136	expansion	3	2	6	1.315e-05	BC10_ORYSJ;Glycosyltransferase BC10 {ECO:0000305}	Branch;PF02485.24
OG03223	expansion	3	2	6	1.315e-05	FAA26_MYCBO;Long-chain-fatty-acid--AMP ligase FadD26	Catalase;PF00199.22^Hexapep;PF00132.27^AMP-binding;PF00501.31^Amino_oxidase;PF01593.27^PP-binding;PF00550.28^NAD_binding_8;PF13450.9^DAO;PF01266.27
OG00275	expansion	3	3	6	0.00180865	STC_RICCO;Sugar carrier protein C	MFS_1;PF07690.19^Sugar_tr;PF00083.27^TRI12;PF06609.16
OG00611	expansion	3	3	6	0.00180865	CAES_ARATH;Probable carbohydrate esterase At4g34215	SASA;PF03629.21
OG01545	expansion	2	2	6	7.28029e-08	NA	NA
OG02037	expansion	2	2	6	7.28029e-08	YJF5_YEAST;LOG family protein YJL055W	Lysine_decarbox;PF03641.17^LDcluster4;PF18306.4
OG02121	expansion	2	2	6	7.28029e-08	NA	Ank_3;PF13606.9^Ank;PF00023.33^Ank_5;PF13857.9^Ank_4;PF13637.9^Ank_2;PF12796.10^PGG;PF13962.9
OG00899	expansion	2	3	6	1.315e-05	NOI4_ARATH;Protein NOI4 {ECO:0000303|PubMed:15845764}	AvrRpt-cleavage;PF05627.14
OG01062	expansion	2	2	6	1.315e-05	RL72_ARATH;Large ribosomal subunit protein uL30y {ECO:0000303|PubMed:36423343}	Ribosomal_L30_N;PF08079.15^Ribosomal_L30;PF00327.23
OG01336	expansion	2	3	6	1.315e-05	RANA1_TOBAC;GTP-binding nuclear protein Ran-A1	Ras;PF00071.25^Roc;PF08477.16^Arf;PF00025.24
OG01395	expansion	2	3	6	1.315e-05	P2C55_ARATH;Probable protein phosphatase 2C 55	SpoIIE;PF07228.15^PP2C;PF00481.24^PP2C_2;PF13672.9
OG02382	expansion	2	3	6	1.315e-05	CKI1_ARATH;Histidine kinase CKI1	Response_reg;PF00072.27^HATPase_c;PF02518.29^HisKA;PF00512.28^PPR;PF01535.23^PPR_2;PF13041.9^PPR_1;PF12854.10^PPR_3;PF13812.9^PPR_long;PF17177.7
OG03531	expansion	2	3	6	1.315e-05	BAMS_PEA;Beta-amyrin synthase	SQHop_cyclase_N;PF13249.9^Prenyltrans;PF00432.24^SQHop_cyclase_C;PF13243.9
OG00434	expansion	2	4	6	0.00180865	MJE1_VITVI;Methyl jasmonate esterase 1 {ECO:0000303|PubMed:26934101}	Abhydrolase_6;PF12697.10^Abhydrolase_1;PF00561.23^Hydrolase_4;PF12146.11
OG01908	expansion	1	0	6	1.95308e-10	ZAT9_ARATH;Zinc finger protein ZAT9	zf-C2H2_6;PF13912.9^zf-C2H2_4;PF13894.9^zf-C2H2_jaz;PF12171.11^zf-C2H2;PF00096.29^zf-met;PF12874.10
OG01471	expansion	1	2	6	7.28029e-08	WTR8_ARATH;WAT1-related protein At1g44800	EamA;PF00892.23
OG01712	expansion	1	2	6	7.28029e-08	RL23_BRUMA;Large ribosomal subunit protein uL14 {ECO:0000305}	F-box-like;PF12937.10^F-box;PF00646.36
OG03660	expansion	1	2	6	7.28029e-08	FBL42_ARATH;F-box/LRR-repeat protein At3g03360	F-box;PF00646.36
OG02169	expansion	0	4	6	0.00180865	FB181_ARATH;Putative F-box protein At3g23950	F-box;PF00646.36
OG00385	expansion	4	1	5	0.0262402	NBS_NARPS;Norbelladine synthase {ECO:0000303|PubMed:30526483}	Bet_v_1;PF00407.22^Polyketide_cyc2;PF10604.12
OG00379	expansion	3	2	5	0.00100568	CB25_PETSP;Chlorophyll a-b binding protein 91R chloroplastic	Chloroa_b-bind;PF00504.24
OG00810	expansion	3	2	5	0.00100568	C7A94_KALSE;Beta-amyrin 28-monooxygenase	p450;PF00067.25
OG03585	expansion	3	2	5	0.00100568	BAP2_ARATH;BON1-associated protein 2	C2;PF00168.33
OG00401	expansion	2	2	5	4.44067e-06	FER1_NOSSO;Ferredoxin-1	Abhydrolase_1;PF00561.23^Abhydrolase_6;PF12697.10^Hydrolase_4;PF12146.11
OG00437	expansion	2	2	5	4.44067e-06	DEF02_ARATH;Defensin-like protein 2	Gamma-thionin;PF00304.23
OG00592	expansion	2	2	5	4.44067e-06	RGGA_TOBAC;RGG repeats nuclear RNA binding protein A {ECO:0000303|PubMed:11905967}	HABP4_PAI-RBP1;PF04774.18^Stm1_N;PF09598.13^PPR_2;PF13041.9^PPR;PF01535.23^PPR_1;PF12854.10
OG00972	expansion	2	2	5	4.44067e-06	IRT1_ARATH;Fe(2+) transport protein 1	Zip;PF02535.25
OG00977	expansion	2	2	5	4.44067e-06	TSR2_MOUSE;Pre-rRNA-processing protein TSR2 homolog	WGG;PF10273.12
OG01108	expansion	2	2	5	4.44067e-06	RL223_ARATH;Large ribosomal subunit protein eL22y {ECO:0000303|PubMed:36423343}	Ribosomal_L22e;PF01776.20
OG01525	expansion	2	1	5	4.44067e-06	ATL41_ORYSJ;E3 ubiquitin-protein ligase Os04g0590900	zf-RING_2;PF13639.9^zf-RING_11;PF17123.8^zf-rbx1;PF12678.10^zf-C3HC4_2;PF13923.9^zf-C3HC4;PF00097.28
OG01692	expansion	2	2	5	4.44067e-06	CX6B2_ARATH;Cytochrome c oxidase subunit 6b-2	COX6B;PF02297.20
OG01776	expansion	2	2	5	4.44067e-06	NGR_MEDTR;Protein NEGATIVE GRAVITROPIC RESPONSE OF ROOTS {ECO:0000303|PubMed:27748769}	NA
OG01778	expansion	2	2	5	4.44067e-06	AGDP1_ARATH;Protein AGENET DOMAIN (AGD)-CONTAINING P1 {ECO:0000303|PubMed:30382101}	Agenet;PF05641.15
OG01892	expansion	2	2	5	4.44067e-06	SC61B_ARATH;Protein transport protein Sec61 subunit beta	Sec61_beta;PF03911.19
OG02527	expansion	2	1	5	4.44067e-06	NA	Dynein_IC2;PF11540.11
OG02703	expansion	2	2	5	4.44067e-06	RL38_ARATH;Large ribosomal subunit protein eL38z/eL38y {ECO:0000303|PubMed:36423343}	Ribosomal_L38e;PF01781.21
OG02744	expansion	2	2	5	4.44067e-06	SRC33_ARATH;Serine/arginine-rich SC35-like splicing factor SCL33	RRM_1;PF00076.25
OG03623	expansion	2	2	5	4.44067e-06	NA	NA
OG15651	expansion	2	0	5	4.44067e-06	ARR10_ARATH;Two-component response regulator ARR10	Response_reg;PF00072.27
OG00287	expansion	2	3	5	0.00100568	IPT3_ARATH;Adenylate isopentenyltransferase 3 chloroplastic	IPPT;PF01715.20^IPT;PF01745.19
OG00544	expansion	2	3	5	0.00100568	VITH4_ARATH;Vacuolar iron transporter homolog 4 {ECO:0000305}	VIT1;PF01988.22
OG00959	expansion	2	3	5	0.00100568	TMK4_ARATH;Receptor-like kinase TMK4 {ECO:0000303|PubMed:23613767}	LRR_4;PF12799.10^LRR_8;PF13855.9^Pkinase;PF00069.28^PK_Tyr_Ser-Thr;PF07714.20^LRRNT_2;PF08263.15^LRR_1;PF00560.36^PPR;PF01535.23^PPR_2;PF13041.9^PPR_1;PF12854.10
OG01014	expansion	2	3	5	0.00100568	VESTR_MEDSA;Vestitone reductase	Epimerase;PF01370.24^3Beta_HSD;PF01073.22^GDP_Man_Dehyd;PF16363.8^NAD_binding_4;PF07993.15^NAD_binding_10;PF13460.9^NmrA;PF05368.16
OG02944	expansion	2	3	5	0.00100568	DV4H_CATRO;Deacetoxyvindoline 4-hydroxylase {ECO:0000303|PubMed:9290645}	DIOX_N;PF14226.9^2OG-FeII_Oxy;PF03171.23
OG03359	expansion	2	3	5	0.00100568	NA	DUF659;PF04937.18^Dimer_Tnp_hAT;PF05699.17
OG02238	expansion	1	1	5	1.48715e-08	CST_ARATH;Probable serine/threonine-protein kinase CST {ECO:0000305}	PK_Tyr_Ser-Thr;PF07714.20^Pkinase;PF00069.28
OG00669	expansion	1	2	5	4.44067e-06	PUN1_CAPAN;Acyltransferase Pun1 {ECO:0000305}	Transferase;PF02458.18
OG01621	expansion	1	2	5	4.44067e-06	BH075_ARATH;Transcription factor bHLH75	NA
OG01921	expansion	1	2	5	4.44067e-06	GL93_ORYSJ;Germin-like protein 9-3	Cupin_1;PF00190.25^Cupin_2;PF07883.14
OG02178	expansion	1	1	5	4.44067e-06	SC16B_ARATH;Protein transport protein SEC16B homolog {ECO:0000305}	Sec16_C;PF12931.10^Sec16;PF12932.10
OG03764	expansion	1	1	5	4.44067e-06	JOS1_PONAB;Josephin-1	NA
OG04135	expansion	1	2	5	4.44067e-06	RS30_ARATH;Small ribosomal subunit protein eS30z/eS30y/eS30x {ECO:0000303|PubMed:36423343}	Ribosomal_S30;PF04758.17
OG00313	expansion	1	3	5	0.00100568	NA	Plant_tran;PF04827.17^DDE_Tnp_4;PF13359.9
OG00912	expansion	1	3	5	0.00100568	RCI2B_ARATH;Hydrophobic protein RCI2B	Pmp3;PF01679.20
OG01183	expansion	1	3	5	0.00100568	NA	NA
OG00167	expansion	0	0	5	1.48715e-08	POLX_TOBAC;Retrovirus-related Pol polyprotein from transposon TNT 1-94	RVT_2;PF07727.17
OG00336	expansion	0	0	5	1.48715e-08	COPIA_DROME;Copia protein	Retrotran_gag_2;PF14223.9
OG14134	expansion	0	1	5	1.48715e-08	RDUF1_ARATH;E3 ubiquitin-protein ligase RDUF1 {ECO:0000305}	zf-C3HC4_2;PF13923.9^zf-RING_2;PF13639.9^zf-RING_11;PF17123.8^zf-rbx1;PF12678.10^zf-RING_UBOX;PF13445.9
OG00757	expansion	0	3	5	0.00100568	RNHX1_ARATH;Putative ribonuclease H protein At1g65750	RVT_1;PF00078.30^RVT_3;PF13456.9^zf-RVT;PF13966.9^Exo_endo_phos;PF03372.26
OG00811	expansion	0	3	5	0.00100568	2SS5_HELAN;2S seed storage protein	Tryp_alpha_amyl;PF00234.25
OG03882	expansion	0	3	5	0.00100568	ERF22_ARATH;Ethylene-responsive transcription factor ERF022	AP2;PF00847.23
OG00717	expansion	0	4	5	0.0262402	NA	NA
OG03338	expansion	0	4	5	0.0262402	POLR2_ARATH;Retrovirus-related Pol polyprotein from transposon RE2	zf-CCHC;PF00098.26^Retrotran_gag_2;PF14223.9^Retrotrans_gag;PF03732.20
OG00160	expansion	2	1	4	0.000426633	POLR_DROME;Retrovirus-related Pol polyprotein from type-2 retrotransposable element R2DM	RVT_1;PF00078.30^DUF4283;PF14111.9
OG00286	expansion	2	2	4	0.000426633	CYCLD_ANTMA;Transcription factor CYCLOIDEA	TCP;PF03634.16
OG00443	expansion	2	2	4	0.000426633	DRE1A_ARATH;Dehydration-responsive element-binding protein 1A {ECO:0000303|PubMed:9707537}	AP2;PF00847.23
OG00500	expansion	2	2	4	0.000426633	LBD1_ARATH;LOB domain-containing protein 1	LOB;PF03195.17
OG00506	expansion	2	2	4	0.000426633	NRT21_ARATH;High-affinity nitrate transporter 2.1	MFS_1;PF07690.19
OG00605	expansion	2	2	4	0.000426633	NCL_ARATH;Sodium/calcium exchanger NCL {ECO:0000305}	EF-hand_1;PF00036.35^Na_Ca_ex;PF01699.27^EF-hand_6;PF13405.9^EF-hand_7;PF13499.9^EF-hand_5;PF13202.9^EF-hand_8;PF13833.9^PPR;PF01535.23^PPR_2;PF13041.9^PPR_1;PF12854.10
OG00640	expansion	2	2	4	0.000426633	DTX32_ARATH;Protein DETOXIFICATION 32 {ECO:0000303|PubMed:11739388}	MatE;PF01554.21^Polysacc_synt_C;PF14667.9
OG00694	expansion	2	2	4	0.000426633	ARI9_ARATH;Probable E3 ubiquitin-protein ligase ARI9	A_thal_3526;PF09713.13^PPR_2;PF13041.9^PPR_1;PF12854.10^PPR;PF01535.23^PPR_3;PF13812.9
OG00738	expansion	2	2	4	0.000426633	SP1L2_ORYSJ;Protein SPIRAL1-like 2	NA
OG00804	expansion	2	2	4	0.000426633	AHL2_ARATH;AT-hook motif nuclear-localized protein 2 {ECO:0000312|EMBL:FAA00273.1}	PCC;PF03479.18
OG00851	expansion	2	2	4	0.000426633	ERF25_ARATH;Ethylene-responsive transcription factor ERF025	AP2;PF00847.23
OG01030	expansion	2	2	4	0.000426633	1A12_CUCPE;1-aminocyclopropane-1-carboxylate synthase 2	Aminotran_1_2;PF00155.24
OG01050	expansion	2	1	4	0.000426633	KASC1_HORVU;3-oxoacyl-[acyl-carrier-protein] synthase I chloroplastic	ketoacyl-synt;PF00109.29^Ketoacyl-synt_C;PF02801.25
OG01124	expansion	2	2	4	0.000426633	LBD18_ARATH;LOB domain-containing protein 18	LOB;PF03195.17
OG01131	expansion	2	1	4	0.000426633	DNJ20_ARATH;Chaperone protein dnaJ 20 chloroplastic	DnaJ;PF00226.34
OG01153	expansion	2	2	4	0.000426633	SLD1_KLULA;Delta 8-(E)-sphingolipid desaturase {ECO:0000250|UniProtKB:Q8NKG8}	FA_desaturase;PF00487.27^Cyt-b5;PF00173.31
OG01277	expansion	2	2	4	0.000426633	PER39_ARATH;Peroxidase 39	peroxidase;PF00141.26
OG01348	expansion	2	2	4	0.000426633	GRXC9_ARATH;Glutaredoxin-C9	Glutaredoxin;PF00462.27
OG01491	expansion	2	2	4	0.000426633	JOX4_ARATH;Jasmonate-induced oxygenase 4 {ECO:0000303|PubMed:28559313}	2OG-FeII_Oxy;PF03171.23^DIOX_N;PF14226.9
OG02412	expansion	2	2	4	0.000426633	RS28A_YEAST;Small ribosomal subunit protein eS28A {ECO:0000303|PubMed:24524803}	Ribosomal_S28e;PF01200.21
OG02535	expansion	2	1	4	0.000426633	RFS6_ARATH;Probable galactinol--sucrose galactosyltransferase 6	Raffinose_syn;PF05691.15^RRM_1;PF00076.25
OG02557	expansion	2	2	4	0.000426633	PSK6_ARATH;Putative phytosulfokines 6	PSK;PF06404.15
OG02882	expansion	2	2	4	0.000426633	ACD6_ARATH;Protein ACCELERATED CELL DEATH 6 {ECO:0000303|PubMed:10488236}	Ank_3;PF13606.9^Ank_5;PF13857.9^Ank;PF00023.33^Ank_4;PF13637.9^Ank_2;PF12796.10^PGG;PF13962.9
OG02905	expansion	2	2	4	0.000426633	YOAA_BACSU;Uncharacterized N-acetyltransferase YoaA	Acetyltransf_3;PF13302.10^Acetyltransf_1;PF00583.28^Acetyltransf_4;PF13420.10
OG03054	expansion	2	2	4	0.000426633	BRH1_ARATH;Brassinosteroid-responsive RING protein 1 {ECO:0000303|PubMed:12012249}	zf-RING_2;PF13639.9^zf-RING_11;PF17123.8^zf-C3HC4;PF00097.28^zf-rbx1;PF12678.10^zf-C3HC4_2;PF13923.9^zf-RING_UBOX;PF13445.9^zf-ANAPC11;PF12861.10^zf-RING_5;PF14634.9
OG03591	expansion	2	1	4	0.000426633	AIL6_ARATH;AP2-like ethylene-responsive transcription factor AIL6 {ECO:0000303|PubMed:15988559}	PHD_Oberon;PF07227.14
OG04107	expansion	2	2	4	0.000426633	CE101_ARATH;G-type lectin S-receptor-like serine/threonine-protein kinase CES101	Glyco_hydro_18;PF00704.31^Pkinase;PF00069.28^PK_Tyr_Ser-Thr;PF07714.20
OG06756	expansion	2	2	4	0.000426633	ATP6A_ARATH;ATP synthase small subunit 6-A mitochondrial {ECO:0000303|PubMed:18338219 ECO:0000303|PubMed:23096681}	NA
OG01654	expansion	1	1	4	1.13237e-06	NA	NA
OG01760	expansion	1	1	4	1.13237e-06	FB316_ARATH;F-box protein At1g61340	NA
OG03474	expansion	1	1	4	1.13237e-06	RTL2_ARATH;Ribonuclease 3-like protein 2	dsrm;PF00035.29^DND1_DSRM;PF14709.10^Ribonucleas_3_3;PF14622.9^Ribonuclease_3;PF00636.29
OG03972	expansion	1	1	4	1.13237e-06	CIP1_ARATH;COP1-interactive protein 1 {ECO:0000303|PubMed:7753789}	KIP1;PF07765.15^Tropomyosin_1;PF12718.10^Crescentin;PF19220.3^HAP1_N;PF04849.16^ATG16;PF08614.14
OG04242	expansion	1	1	4	1.13237e-06	NA	DUF1639;PF07797.17
OG01256	expansion	1	2	4	0.000426633	RL37A_BRARR;Large ribosomal subunit protein eL43 {ECO:0000305}	Ribosomal_L37ae;PF01780.22
OG01358	expansion	1	2	4	0.000426633	ATL70_ARATH;RING-H2 finger protein ATL70	zf-RING_11;PF17123.8^zf-RING_2;PF13639.9^zf-rbx1;PF12678.10^zf-C3HC4_2;PF13923.9^zf-C3HC4;PF00097.28^zf-RING_UBOX;PF13445.9^zf-RING_5;PF14634.9
OG01456	expansion	1	2	4	0.000426633	BCP_PETHY;Blue copper protein {ECO:0000303|PubMed:25971550}	Cu_bind_like;PF02298.20
OG05053	expansion	1	2	4	0.000426633	U91D2_STERE;UDP-glycosyltransferase 91D2 {ECO:0000303|PubMed:26358188 ECO:0000303|PubMed:27923373}	UDPGT;PF00201.21
OG09687	expansion	1	2	4	0.000426633	GLR28_ARATH;Glutamate receptor 2.8	Lig_chan;PF00060.29^ANF_receptor;PF01094.31^SBP_bac_3;PF00497.23^Peripla_BP_6;PF13458.9^Lig_chan-Glu_bd;PF10613.12
OG00477	expansion	0	0	4	1.13237e-06	NA	PMD;PF10536.12
OG12910	expansion	0	0	4	1.13237e-06	PP2B8_ARATH;Putative F-box protein PP2-B8	PP2;PF14299.9
OG00688	expansion	0	2	4	0.000426633	PRB1_ARATH;Pathogenesis-related protein 1 {ECO:0000303|PubMed:11725949}	NA
OG05588	expansion	0	2	4	0.000426633	GRI22_VITVI;Ripening-related protein grip22	NA
OG07368	expansion	0	2	4	0.000426633	TIP12_MAIZE;Aquaporin TIP1-2	DUF295;PF03478.21
OG09032	expansion	0	2	4	0.000426633	ATL3_ARATH;RING-H2 finger protein ATL3	zf-RING_2;PF13639.9^zf-RING_11;PF17123.8^zf-rbx1;PF12678.10^zf-C3HC4_2;PF13923.9^zf-C3HC4;PF00097.28
OG00869	expansion	2	1	3	0.0131309	Y1675_ARATH;G-type lectin S-receptor-like serine/threonine-protein kinase At1g67520	PK_Tyr_Ser-Thr;PF07714.20^Pkinase;PF00069.28^B_lectin;PF01453.27^PAN_2;PF08276.14^ABC1;PF03109.19^DUF3403;PF11883.11^Pkinase_fungal;PF17667.4^Haspin_kinase;PF12330.11
OG00964	expansion	2	1	3	0.0131309	FMO1_ARATH;Probable flavin-containing monooxygenase 1	Pyr_redox_3;PF13738.9^FMO-like;PF00743.22^Pyr_redox_2;PF07992.17^Lys_Orn_oxgnase;PF13434.9^NAD_binding_8;PF13450.9
OG02275	expansion	2	1	3	0.0131309	U79B6_ARATH;UDP-glycosyltransferase 79B6	UDPGT;PF00201.21
OG02459	expansion	2	1	3	0.0131309	PSK3_ARATH;Phytosulfokines 3	PSK;PF06404.15
OG14256	expansion	2	0	3	0.0131309	CRK34_ARATH;Cysteine-rich receptor-like protein kinase 34 {ECO:0000305}	Pkinase;PF00069.28^PK_Tyr_Ser-Thr;PF07714.20
OG00998	expansion	1	1	3	8.62234e-05	MYB75_ARATH;Transcription factor MYB75	Myb_DNA-binding;PF00249.34^Myb_DNA-bind_6;PF13921.9
OG01230	expansion	1	1	3	8.62234e-05	WTR2_ARATH;WAT1-related protein At1g09380	EamA;PF00892.23
OG02157	expansion	1	1	3	8.62234e-05	FB253_ARATH;F-box protein At5g07610	F-box;PF00646.36
OG03068	expansion	1	1	3	8.62234e-05	NA	NA
OG03446	expansion	1	1	3	8.62234e-05	FB300_ARATH;F-box protein At5g65850	F-box;PF00646.36^F-box-like;PF12937.10^FBA_1;PF07734.16
OG04113	expansion	1	1	3	8.62234e-05	PME_PRUPE;Pectinesterase/pectinesterase inhibitor PPE8B	Pectinesterase;PF01095.22
OG04243	expansion	1	1	3	8.62234e-05	MAKR6_ARATH;Probable membrane-associated kinase regulator 6	NA
OG04578	expansion	1	1	3	8.62234e-05	NA	NA
OG00315	expansion	1	2	3	0.0131309	FDL1_ARATH;F-box/FBD/LRR-repeat protein At1g13570	F-box;PF00646.36
OG00499	expansion	1	2	3	0.0131309	AGL61_ARATH;Agamous-like MADS-box protein AGL61	SRF-TF;PF00319.21
OG00745	expansion	1	2	3	0.0131309	CYT1_ACTCC;Cysteine proteinase inhibitor 1 {ECO:0000303|PubMed:14697268}	SQAPI;PF16845.8^Cystatin;PF00031.24
OG01265	expansion	1	2	3	0.0131309	SAU40_ARATH;Auxin-responsive protein SAUR40 {ECO:0000305}	Auxin_inducible;PF02519.17
OG01442	expansion	1	2	3	0.0131309	SPZ4_HORVU;Serpin-Z4	Serpin;PF00079.23
OG01596	expansion	1	2	3	0.0131309	PER2_ORYSJ;Peroxidase 2	peroxidase;PF00141.26
OG02451	expansion	1	2	3	0.0131309	FB279_ARATH;F-box protein At5g41720	FBA_3;PF08268.15
OG00361	expansion	0	1	3	8.62234e-05	POL5_DROME;Retrovirus-related Pol polyprotein from transposon opus	Integrase_H2C2;PF17921.4^RT_RNaseH_2;PF17919.4^RT_RNaseH;PF17917.4^LRR_4;PF12799.10
OG00945	expansion	0	0	3	8.62234e-05	POL2_DROME;Retrovirus-related Pol polyprotein from transposon 297	RVT_3;PF13456.9^Integrase_H2C2;PF17921.4^RT_RNaseH_2;PF17919.4^RT_RNaseH;PF17917.4^RVT_1;PF00078.30^rve;PF00665.29^RNase_H;PF00075.27
OG01278	expansion	0	1	3	8.62234e-05	NA	NA
OG02395	expansion	0	0	3	8.62234e-05	FB52_ARATH;Putative F-box protein At1g50870	F-box;PF00646.36^FBA_3;PF08268.15^F-box-like;PF12937.10
OG12915	expansion	0	0	3	8.62234e-05	SABP2_TOBAC;Salicylic acid-binding protein 2 {ECO:0000303|PubMed:14673096}	Abhydrolase_6;PF12697.10^Abhydrolase_1;PF00561.23^Hydrolase_4;PF12146.11
OG13939	expansion	0	0	3	8.62234e-05	NA	NA
OG01504	expansion	0	2	3	0.0131309	PGAP3_XENTR;Post-GPI attachment to proteins factor 3	Retrotrans_gag;PF03732.20
OG03918	expansion	0	2	3	0.0131309	NA	Retrotrans_gag;PF03732.20^Ty3_capsid;PF19259.2
OG00334	contraction	21	34	16	1.8141e-07	DRL3_ARATH;Probable disease resistance protein At1g15890	NB-ARC;PF00931.25^LRR_8;PF13855.9^AAA_22;PF13401.9^NACHT;PF05729.15
OG14469	contraction	8	3	0	1.55257e-06	RL91_ARATH;Large ribosomal subunit protein uL6z/uL6y {ECO:0000303|PubMed:36423343}	Ribosomal_L6;PF00347.26
OG00170	contraction	12	48	15	2.75968e-06	RGA3_SOLBU;Putative disease resistance protein RGA3	LRR_4;PF12799.10^LRR_8;PF13855.9^NB-ARC;PF00931.25^Rx_N;PF18052.4
OG03122	contraction	8	14	5	6.57329e-05	NA	NA
OG01377	contraction	2	2	0	9.49763e-05	CRK10_ARATH;Cysteine-rich receptor-like protein kinase 10	PK_Tyr_Ser-Thr;PF07714.20^DUF3403;PF11883.11^Pkinase;PF00069.28
OG01664	contraction	2	2	0	9.49763e-05	GYAR_THEPD;Glyoxylate reductase {ECO:0000255|HAMAP-Rule:MF_00776}	2-Hacid_dh_C;PF02826.22^2-Hacid_dh;PF00389.33^NAD_binding_2;PF03446.18
OG09684	contraction	2	2	0	9.49763e-05	EPHB_MYCTU;Epoxide hydrolase B {ECO:0000303|PubMed:16511284}	Abhydrolase_1;PF00561.23^Abhydrolase_6;PF12697.10^Hydrolase_4;PF12146.11
OG03076	contraction	0	41	7	0.000135581	NA	Transposase_21;PF02992.17^DUF4218;PF13960.9
OG01705	contraction	5	6	2	0.000541426	DRP4C_ARATH;Dynamin-related protein 4C	Dynamin_M;PF01031.23^GED;PF02212.21^Dynamin_N;PF00350.26^TPR_2;PF07719.20^TPR_1;PF00515.31
OG03467	contraction	1	18	2	0.000541426	DPM2_ARATH;Dolichol-phosphate mannose synthase subunit 2 {ECO:0000305}	DPM2;PF07297.15
OG00178	contraction	8	7	4	0.00131853	TPSGD_VITVI;(-)-germacrene D synthase	Terpene_synth_C;PF03936.19^Terpene_syn_C_2;PF19086.3^Terpene_synth;PF01397.24
OG00172	contraction	29	64	42	0.00135092	EIX1_SOLLC;Receptor-like protein EIX1 {ECO:0000305}	LRR_4;PF12799.10^LRR_8;PF13855.9^LRR_1;PF00560.36^LRR_6;PF13516.9^LRRNT_2;PF08263.15
OG00649	contraction	8	10	5	0.00182471	SABP2_TOBAC;Salicylic acid-binding protein 2 {ECO:0000303|PubMed:14673096}	Abhydrolase_6;PF12697.10^Abhydrolase_1;PF00561.23^Hydrolase_4;PF12146.11
OG00243	contraction	0	4	0	0.0195271	RRPO_OENBE;RNA-directed DNA polymerase homolog	Retrotrans_gag;PF03732.20^gag-asp_proteas;PF13975.9^Asp_protease_2;PF13650.9^Ty3_capsid;PF19259.2^RVT_1;PF00078.30^RVP_2;PF08284.14^RT_RNaseH;PF17917.4^RT_RNaseH_2;PF17919.4^Asp_protease;PF09668.13^Integrase_H2C2;PF17921.4
OG01274	contraction	0	4	0	0.0195271	PSBD_ANTMA;Photosystem II D2 protein {ECO:0000255|HAMAP-Rule:MF_01383}	PSII;PF00421.22^Photo_RC;PF00124.22
OG00109	contraction	31	36	31	0.0349544	RGA3_SOLBU;Putative disease resistance protein RGA3	LRR_4;PF12799.10^LRR_8;PF13855.9^NB-ARC;PF00931.25^Rx_N;PF18052.4^LRR_1;PF00560.36^Nucleoporin2;PF04096.17
OG01818	contraction	2	2	1	0.03838	YL728_MIMIV;Uncharacterized protein L728	DUF2828;PF11443.11
OG09048	contraction	8	2	1	0.03838	POLG_PVCV2;Genome polyprotein	RT_RNaseH_2;PF17919.4^RT_RNaseH;PF17917.4^RVT_1;PF00078.30
OG10039	contraction	2	5	1	0.03838	MLO15_ARATH;MLO-like protein 15	NA
OG00081	contraction	27	49	36	0.0442079	DRL31_ARATH;Putative disease resistance protein At5g05400	LRR_4;PF12799.10^LRR_8;PF13855.9^NB-ARC;PF00931.25^ATPase_2;PF01637.21^AAA_22;PF13401.9

[truncated: 3 more sheets: Table S10, Table S11, Table S12]
